# Supplementary material for: Arabidopsis LTR retrotransposons and their regulation by epigenetically activated small RNA
Source: bioRxiv preprint, doi:10.1101/2020.01.24.919167, version 3 (2020-02-27)
Supplement: Supplemental Table S5 [file 919167_file13.xlsx]

## Sheet: Notes
Table S5. ChIPseq data of H3K9me2
Four comparisons were made:
1) WT vs rdr6 of Replicate 1 (R1)
2) WT vs rdr6 of Replicate 2 (R2)
3) WT vs ddm1 R1
4) WT vs ddm1 R2
5) ddm1 vs ddm1rdr6 R1
6) ddm1 vs ddm1rdr6 R2
Column labels:
chr	chromosome name
start	start position of the peak
end	end position of the peak
summit	summit position of the peak (relative to start)
M_value	M value (log2 fold change) of normalized read densities under comparison
A_value	A value (average signal strength) of normalized read densities under comparison
P_value
Peak_Group	indicates where the peak is come from and whether it is a common peak
normalized_read_density_in_sample1
normalized_read_density_in_sample2

## Sheet: WT vs rdr6 R1
chr	start	end	summit	M_value	A_value	P_value	Peak_Group	normalized_read_density_in_H3K9me2_WT_R1	normalized_read_density_in_H3K9me2_rdr6_R1
1	525574	526353	390	-0.22297	7.15752	0.0101342	k9me2_wt_r1_peaks_unique	132.15	154.237
1	578027	579168	571	0.10289	7.06283	0.020216	k9me2_wt_r1_peaks_unique	138.551	129.014
1	1265216	1268045	1415	-0.00659	7.18681	0.0233264	k9me2_wt_r1_peaks_unique	145.363	146.028
1	1619812	1620288	238	-0.27874	7.19927	0.00559346	k9me2_wt_r1_peaks_unique	133.426	161.864
1	2587332	2588268	468	0.4097	6.66343	0.00358963	k9me2_wt_r1_peaks_unique	116.831	87.9481
1	2843989	2844853	432	0.0656	7.12084	0.0224118	k9me2_wt_r1_peaks_unique	142.384	136.054
1	2957886	2958782	448	-0.21062	7.20162	0.0110113	k9me2_wt_r1_peaks_unique	136.837	158.345
1	3737617	3738023	203	-0.16063	7.17215	0.0150795	k9me2_wt_r1_peaks_unique	136.413	152.479
1	4093614	4094319	353	0.27228	6.80893	0.01	k9me2_wt_r1_peaks_unique	123.218	102.026
1	5658424	5658814	195	0.11382	6.6617	0.0239453	k9me2_wt_r1_peaks_unique	105.318	97.3285
1	5700922	5701236	157	0.31885	7.01147	0.00548881	k9me2_wt_r1_peaks_unique	144.097	115.524
1	6197710	6198048	169	0.16994	6.72415	0.0195141	k9me2_wt_r1_peaks_unique	112.137	99.6764
1	7036121	7036702	291	0.16697	6.63515	0.0208689	k9me2_wt_r1_peaks_unique	105.32	93.8097
1	7124086	7124894	404	-0.06214	7.06314	0.0227706	k9me2_wt_r1_peaks_unique	130.877	136.638
1	7204327	7205363	518	-0.19899	7.24439	0.0118612	k9me2_wt_r1_peaks_unique	141.523	162.454
1	7595473	7596595	561	-0.21342	7.18949	0.0109928	k9me2_wt_r1_peaks_unique	135.559	157.172
1	7725359	7726671	656	0.08568	7.23877	0.0200431	k9me2_wt_r1_peaks_unique	155.59	146.619
1	7861536	7863658	1061	-0.00128	7.15426	0.0235693	k9me2_wt_r1_peaks_unique	142.382	142.508
1	8160255	8160650	198	-0.00823	7.02678	0.0246232	k9me2_wt_r1_peaks_unique	130.027	130.771
1	8204918	8205274	178	-0.03793	6.91832	0.0247888	k9me2_wt_r1_peaks_unique	119.375	122.555
1	8238039	8238949	455	0.35288	6.96864	0.00376101	k9me2_wt_r1_peaks_unique	141.541	110.83
1	8289794	8290885	546	0.62336	7.13421	3.50483e-05	k9me2_wt_r1_peaks_unique	174.356	113.184
1	8475132	8476255	562	0.17544	7.23673	0.0134343	k9me2_wt_r1_peaks_unique	160.28	141.927
1	8627661	8628760	550	-0.37919	7.24022	0.0018885	k9me2_wt_r1_peaks_unique	132.571	172.424
1	8870076	8870365	145	0.24234	6.6547	0.0137609	k9me2_wt_r1_peaks_unique	109.582	92.6379
1	9111521	9112361	420	0.00199	7.14396	0.023652	k9me2_wt_r1_peaks_unique	141.529	141.334
1	9194161	9195936	888	-0.04966	7.07557	0.0235508	k9me2_wt_r1_peaks_unique	132.582	137.225
1	9765630	9766640	505	-0.16079	6.99507	0.017009	k9me2_wt_r1_peaks_unique	120.649	134.874
1	9811902	9812313	206	-0.13494	6.8206	0.021266	k9me2_wt_r1_peaks_unique	107.869	118.445
1	10316970	10320076	1553	-0.29082	7.13451	0.00592722	k9me2_wt_r1_peaks_unique	127.037	155.408
1	10405260	10406773	757	-0.01216	7.05683	0.0243466	k9me2_wt_r1_peaks_unique	132.583	133.705
1	10568716	10569006	145	0.05534	6.45696	0.0287016	k9me2_wt_r1_peaks_unique	89.5505	86.1805
1	11011097	11012241	572	-0.02179	7.07088	0.0241662	k9me2_wt_r1_peaks_unique	133.434	135.465
1	11089497	11089880	192	-0.07292	6.98141	0.0227523	k9me2_wt_r1_peaks_unique	123.208	129.595
1	11126526	11127703	589	0.09594	7.36566	0.0182605	k9me2_wt_r1_peaks_unique	170.5	159.531
1	11479230	11479675	223	0.25352	6.66029	0.0137609	k9me2_wt_r1_peaks_unique	110.435	92.6379
1	11733670	11734178	254	0.12456	7.3259	0.0163997	k9me2_wt_r1_peaks_unique	167.519	153.662
1	11941898	11942957	530	-0.12243	7.15756	0.0183385	k9me2_wt_r1_peaks_unique	136.84	148.959
1	12328608	12329186	289	0.0279	6.80605	0.0263901	k9me2_wt_r1_peaks_unique	112.986	110.822
1	12797612	12799415	902	0.20295	7.26828	0.0111284	k9me2_wt_r1_peaks_unique	165.393	143.689
1	12970708	12972008	650	-0.08019	7.27753	0.0198517	k9me2_wt_r1_peaks_unique	150.899	159.523
1	12973857	12975394	769	0.02522	7.17935	0.0232462	k9me2_wt_r1_peaks_unique	146.216	143.682
1	13059607	13060231	312	0.08725	6.39214	0.0276276	k9me2_wt_r1_peaks_unique	86.5682	81.488
1	13066097	13066473	188	-0.01789	6.94892	0.0253073	k9me2_wt_r1_peaks_unique	122.784	124.316
1	13068156	13068730	287	0.07421	7.12515	0.0218632	k9me2_wt_r1_peaks_unique	143.236	136.055
1	13095287	13095570	142	-0.01385	7.0623	0.0243466	k9me2_wt_r1_peaks_unique	133.009	134.292
1	13355344	13355723	190	0.06076	6.71138	0.0264738	k9me2_wt_r1_peaks_unique	107.022	102.608
1	13544665	13545088	212	0.0598	6.5542	0.0278528	k9me2_wt_r1_peaks_unique	95.9426	92.0471
1	13583833	13585161	664	-0.00736	7.10902	0.0239918	k9me2_wt_r1_peaks_unique	137.696	138.4
1	14819449	14821969	1260	0.3062	7.12463	0.00478773	k9me2_wt_r1_peaks_unique	155.173	125.499
1	16565318	16565783	233	0.02086	7.08596	0.0239908	k9me2_wt_r1_peaks_unique	136.844	134.88
1	17142998	17144994	998	0.06034	7.88646	0.0164844	k9me2_wt_r1_peaks_unique	241.626	231.728
1	17201568	17201980	206	0.04276	6.83621	0.0258238	k9me2_wt_r1_peaks_unique	115.969	112.582
1	17267424	17267733	155	0.07144	6.34207	0.0297965	k9me2_wt_r1_peaks_unique	83.1584	79.1408
1	18111001	18111286	143	0.28982	6.01809	0.0183225	k9me2_wt_r1_peaks_unique	71.6552	58.6143
1	18228845	18229128	142	-0.1488	7.09228	0.016858	k9me2_wt_r1_peaks_unique	129.596	143.676
1	18271496	18271842	173	0.03815	6.97013	0.0247107	k9me2_wt_r1_peaks_unique	127.046	123.73
1	18745751	18746166	208	0.30937	6.7854	0.00733294	k9me2_wt_r1_peaks_unique	122.793	99.0933
1	19027291	19027880	295	0.30597	6.7047	0.00871525	k9me2_wt_r1_peaks_unique	115.976	93.8129
1	19063464	19063813	175	0.28461	6.69401	0.0105957	k9me2_wt_r1_peaks_unique	114.271	93.8123
1	19085925	19086483	279	0.14682	6.59774	0.0221332	k9me2_wt_r1_peaks_unique	101.91	92.049
1	19666046	19666404	179	0.04342	6.7027	0.0269781	k9me2_wt_r1_peaks_unique	105.742	102.607
1	19714468	19714892	212	0.01589	7.16285	0.0234875	k9me2_wt_r1_peaks_unique	144.087	142.509
1	19722787	19723154	184	0.07702	7.21115	0.0208017	k9me2_wt_r1_peaks_unique	152.183	144.271
1	19994328	19995141	407	0.19319	6.76105	0.0161393	k9me2_wt_r1_peaks_unique	115.973	101.438
1	20125478	20125890	206	0.11142	7.02717	0.0195821	k9me2_wt_r1_peaks_unique	135.569	125.493
1	20375666	20377978	1156	-0.06753	7.12111	0.0218632	k9me2_wt_r1_peaks_unique	135.989	142.506
1	20423318	20423713	198	-0.01304	7.09389	0.024079	k9me2_wt_r1_peaks_unique	135.991	137.226
1	20543844	20544499	328	0.01233	7.14313	0.023652	k9me2_wt_r1_peaks_unique	141.956	140.747
1	20549092	20550250	579	-0.00659	7.18681	0.0233264	k9me2_wt_r1_peaks_unique	145.363	146.028
1	20698080	20698363	142	-0.05759	7.04671	0.0233597	k9me2_wt_r1_peaks_unique	129.599	134.877
1	21307590	21308086	248	-0.03423	7.0771	0.0235508	k9me2_wt_r1_peaks_unique	133.434	136.638
1	21323307	21324296	495	-0.10827	7.07677	0.0201688	k9me2_wt_r1_peaks_unique	130.024	140.157
1	21410322	21410914	296	-0.12791	7.13766	0.0184025	k9me2_wt_r1_peaks_unique	134.709	147.198
1	21608759	21609504	373	-0.05695	7.68981	0.0177903	k9me2_wt_r1_peaks_unique	202.438	210.589
1	21682145	21683003	429	0.26833	7.30099	0.0059561	k9me2_wt_r1_peaks_unique	173.063	143.691
1	21740693	21741405	356	0.04169	7.07105	0.0238997	k9me2_wt_r1_peaks_unique	136.418	132.533
1	21788539	21789468	465	0.07052	7.02014	0.0230702	k9me2_wt_r1_peaks_unique	133.011	126.666
1	21858025	21858509	242	-0.08343	6.95642	0.0228986	k9me2_wt_r1_peaks_unique	120.652	127.835
1	22620988	22621847	430	0.28131	6.61831	0.0113922	k9me2_wt_r1_peaks_unique	108.306	89.1186
1	22849299	22850628	665	0.21633	6.97475	0.012303	k9me2_wt_r1_peaks_unique	135.572	116.694
1	23211877	23212544	334	0.21275	6.99456	0.0123232	k9me2_wt_r1_peaks_unique	137.276	118.454
1	23214326	23214929	302	0.14743	6.56079	0.0234152	k9me2_wt_r1_peaks_unique	99.3539	89.7024
1	23357985	23359093	554	0.05752	7.12919	0.022342	k9me2_wt_r1_peaks_unique	142.81	137.228
1	23454245	23454773	264	0.04056	6.92969	0.0246938	k9me2_wt_r1_peaks_unique	123.637	120.21
1	23708654	23710881	1114	-0.07914	7.20177	0.020857	k9me2_wt_r1_peaks_unique	143.231	151.308
1	24184336	24186951	1308	-0.19171	7.17864	0.0125876	k9me2_wt_r1_peaks_unique	135.56	154.825
1	24199355	24200124	385	0.07695	7.14507	0.0217352	k9me2_wt_r1_peaks_unique	145.366	137.816
1	24428930	24429970	520	0.00841	7.00898	0.024813	k9me2_wt_r1_peaks_unique	129.175	128.424
1	24463687	24464301	307	-0.18265	7.25777	0.0126565	k9me2_wt_r1_peaks_unique	143.653	163.041
1	24590770	24592202	716	-0.12209	7.21893	0.0181481	k9me2_wt_r1_peaks_unique	142.803	155.414
1	24831836	24832326	245	0.08987	6.63222	0.0258667	k9me2_wt_r1_peaks_unique	102.335	96.1547
1	25056850	25058083	617	-0.10783	7.25839	0.0180225	k9me2_wt_r1_peaks_unique	147.49	158.936
1	25072523	25073423	450	-0.21918	7.1649	0.0101583	k9me2_wt_r1_peaks_unique	133.003	154.825
1	25345668	25346933	633	-0.16449	7.14219	0.0142407	k9me2_wt_r1_peaks_unique	133.431	149.545
1	25588461	25588807	173	-0.18088	6.86055	0.0161372	k9me2_wt_r1_peaks_unique	109.146	123.725
1	25751312	25751667	178	0.02587	6.69392	0.0276284	k9me2_wt_r1_peaks_unique	104.463	102.607
1	26169931	26170664	367	0.4074	6.7464	0.00296274	k9me2_wt_r1_peaks_unique	123.648	93.2285
1	27204445	27205880	718	-0.07235	7.26545	0.0204787	k9me2_wt_r1_peaks_unique	150.047	157.764
1	27903689	27904684	498	-0.2347	7.16803	0.00940945	k9me2_wt_r1_peaks_unique	132.576	155.998
1	28161447	28161748	151	0.38346	6.27921	0.00784136	k9me2_wt_r1_peaks_unique	88.7048	68.0008
1	28397907	28398380	237	0.10015	6.71449	0.0236267	k9me2_wt_r1_peaks_unique	108.727	101.435
1	28718759	28719042	142	-0.25218	7.1152	0.00850434	k9me2_wt_r1_peaks_unique	127.037	151.302
1	28827702	28828132	215	0.1874	6.88585	0.0161308	k9me2_wt_r1_peaks_unique	126.198	110.826
1	29263419	29263822	202	0.25055	6.59339	0.0148271	k9me2_wt_r1_peaks_unique	105.322	88.5313
1	29983830	29984419	295	0.19992	6.88445	0.0140986	k9me2_wt_r1_peaks_unique	126.624	110.239
1	30251427	30252365	469	0.25559	7.03022	0.00901265	k9me2_wt_r1_peaks_unique	142.816	119.629
3	129233	130536	652	3.47653	6.3941	1.25476e-56	k9me2_wt_r1_peaks_unique	280.599	25.2084
3	340218	342006	894	-0.04947	7.18265	0.0223871	k9me2_wt_r1_peaks_unique	142.806	147.788
3	557756	558040	142	-0.04979	6.0993	0.0329302	k9me2_wt_r1_peaks_unique	67.3873	69.7536
3	1370040	1370447	204	0.32071	6.56996	0.00912158	k9me2_wt_r1_peaks_unique	106.176	85.0126
3	1699072	1700920	924	-0.08775	7.19747	0.0202895	k9me2_wt_r1_peaks_unique	142.379	151.308
3	2544086	2544598	256	-0.0344	7.09549	0.02373	k9me2_wt_r1_peaks_unique	135.138	138.399
3	2777322	2777848	263	-0.10023	7.00004	0.0212488	k9me2_wt_r1_peaks_unique	123.633	132.528
3	3497575	3497864	145	0.0353	6.96185	0.024806	k9me2_wt_r1_peaks_unique	126.194	123.144
3	4093072	4093470	199	-0.12943	7.02947	0.0187245	k9me2_wt_r1_peaks_unique	124.911	136.635
3	4689993	4691063	535	0.09259	6.99052	0.0220576	k9me2_wt_r1_peaks_unique	131.308	123.146
3	5010608	5011436	414	0.19756	7.06351	0.0133259	k9me2_wt_r1_peaks_unique	143.24	124.909
3	5744500	5745192	346	0.10015	6.71449	0.0236267	k9me2_wt_r1_peaks_unique	108.727	101.435
3	6424584	6425101	259	-0.10428	7.06052	0.0209703	k9me2_wt_r1_peaks_unique	128.746	138.396
3	7029473	7029772	150	-0.3613	7.1155	0.00266204	k9me2_wt_r1_peaks_unique	122.348	157.167
3	7427281	7428035	377	-0.05378	7.18049	0.0220025	k9me2_wt_r1_peaks_unique	142.38	147.787
3	7566020	7566418	199	0.00133	6.97882	0.0251061	k9me2_wt_r1_peaks_unique	126.193	126.076
3	7573928	7574974	523	-0.28651	7.26183	0.00528226	k9me2_wt_r1_peaks_unique	138.965	169.493
3	7749952	7750320	184	0.00604	7.19313	0.023247	k9me2_wt_r1_peaks_unique	146.642	146.029
3	7800408	7800813	203	0.25105	6.92531	0.00948894	k9me2_wt_r1_peaks_unique	132.591	111.414
3	7849881	7851474	797	0.30767	7.28488	0.00396553	k9me2_wt_r1_peaks_unique	173.491	140.171
3	7859920	7860421	251	0.31691	7.12323	0.00431203	k9me2_wt_r1_peaks_unique	155.599	124.913
3	7896857	7897761	452	-0.02511	7.18333	0.023009	k9me2_wt_r1_peaks_unique	144.085	146.615
3	7970550	7971151	301	0.07531	7.09425	0.0220594	k9me2_wt_r1_peaks_unique	140.255	133.121
3	8231830	8233288	729	0.1886	7.33013	0.0112255	k9me2_wt_r1_peaks_unique	171.781	150.731
3	8272120	8272928	404	-0.01048	7.4296	0.0214318	k9me2_wt_r1_peaks_unique	171.773	173.025
3	8627385	8627669	142	-0.10512	7.18877	0.0196662	k9me2_wt_r1_peaks_unique	140.674	151.306
3	8824747	8825947	600	0.08334	7.0726	0.0215544	k9me2_wt_r1_peaks_unique	138.551	130.774
3	8874772	8875321	275	0.10762	6.87616	0.0218961	k9me2_wt_r1_peaks_unique	121.935	113.17
3	9139847	9140686	420	-0.09733	7.36147	0.0182956	k9me2_wt_r1_peaks_unique	158.991	170.088
3	9384354	9385533	590	0.15334	6.96484	0.0170551	k9me2_wt_r1_peaks_unique	131.736	118.453
3	9664857	9665195	169	0.29274	6.24621	0.0154916	k9me2_wt_r1_peaks_unique	84.0153	68.5859
3	9688592	9689150	279	-0.12452	7.03193	0.0187245	k9me2_wt_r1_peaks_unique	125.337	136.636
3	10177083	10177483	200	-0.02343	7.0763	0.024078	k9me2_wt_r1_peaks_unique	133.86	136.052
3	10269806	10270307	251	-0.17877	7.16307	0.0142418	k9me2_wt_r1_peaks_unique	134.707	152.478
3	10414408	10414804	198	0.21546	7.05885	0.0115677	k9me2_wt_r1_peaks_unique	143.667	123.736
3	10510609	10511117	254	-0.09347	6.90428	0.0225256	k9me2_wt_r1_peaks_unique	115.965	123.727
3	10546204	10546676	236	0.20878	6.72651	0.016133	k9me2_wt_r1_peaks_unique	113.843	98.5047
3	10648201	10649238	519	-0.08758	7.09915	0.0214336	k9me2_wt_r1_peaks_unique	133.007	141.332
3	10747829	10748517	344	-0.07519	7.18687	0.0209127	k9me2_wt_r1_peaks_unique	141.954	149.548
3	10806568	10807681	557	0.08427	7.3965	0.0192632	k9me2_wt_r1_peaks_unique	173.481	163.638
3	10828688	10828973	143	-0.20282	7.10018	0.0124912	k9me2_wt_r1_peaks_unique	127.891	147.196
3	10937791	10938121	165	0.21611	6.23234	0.0217617	k9me2_wt_r1_peaks_unique	81.0306	69.7579
3	10997976	10998289	157	0.01115	6.75896	0.0269888	k9me2_wt_r1_peaks_unique	108.725	107.888
3	11036459	11036756	149	0.20705	6.44166	0.0200075	k9me2_wt_r1_peaks_unique	93.3893	80.9038
3	11089352	11089839	244	0.1506	6.98475	0.017963	k9me2_wt_r1_peaks_unique	133.44	120.213
3	11112527	11112917	195	0.07134	6.84298	0.0243069	k9me2_wt_r1_peaks_unique	117.674	111.997
3	11244619	11245311	346	0.2636	6.7625	0.0108148	k9me2_wt_r1_peaks_unique	118.957	99.0922
3	11295559	11296628	535	0.23022	6.94497	0.0122384	k9me2_wt_r1_peaks_unique	133.443	113.761
3	11603391	11604379	494	0.08663	7.19824	0.020857	k9me2_wt_r1_peaks_unique	151.33	142.511
3	11763986	11764706	360	0.14153	6.96606	0.0189182	k9me2_wt_r1_peaks_unique	131.309	119.039
3	11862660	11863117	229	0.12722	7.02832	0.0195821	k9me2_wt_r1_peaks_unique	136.422	124.907
3	12239373	12240108	368	0.05694	7.11651	0.0224118	k9me2_wt_r1_peaks_unique	141.532	136.054
3	12597061	12598731	835	-0.04805	7.16026	0.0229214	k9me2_wt_r1_peaks_unique	140.676	145.44
3	12881104	12881437	167	0.07045	7.07904	0.022126	k9me2_wt_r1_peaks_unique	138.55	131.947
3	13040238	13041310	536	0.11327	6.96607	0.0206524	k9me2_wt_r1_peaks_unique	130.03	120.212
3	13179410	13180094	342	0.04629	6.94658	0.0246	k9me2_wt_r1_peaks_unique	125.342	121.384
3	13293240	13293956	358	0.06129	7.21496	0.0213038	k9me2_wt_r1_peaks_unique	151.756	145.444
3	14318676	14319051	188	-0.00525	6.72702	0.0273672	k9me2_wt_r1_peaks_unique	105.741	106.127
3	14471841	14472464	312	-0.00236	7.14179	0.0237356	k9me2_wt_r1_peaks_unique	141.103	141.335
3	15760630	15761738	554	0.02184	7.15987	0.0234057	k9me2_wt_r1_peaks_unique	144.086	141.922
3	15779938	15780328	195	0.44998	6.6642	0.00231708	k9me2_wt_r1_peaks_unique	118.537	86.7751
3	15820946	15821883	469	-0.08873	7.163	0.0204413	k9me2_wt_r1_peaks_unique	138.971	147.786
3	16043686	16044006	160	0.18557	6.74886	0.0172549	k9me2_wt_r1_peaks_unique	114.694	100.851
3	16089503	16089898	198	0.18086	6.72962	0.0183917	k9me2_wt_r1_peaks_unique	112.99	99.6771
3	16201924	16202291	184	0.31246	6.58561	0.00918304	k9me2_wt_r1_peaks_unique	107.028	86.1859
3	16222081	16222393	156	0.07393	6.76663	0.024859	k9me2_wt_r1_peaks_unique	111.708	106.128
3	16371095	16372078	492	-0.20641	7.14925	0.0117179	k9me2_wt_r1_peaks_unique	132.151	152.478
3	16441345	16441972	314	-0.07422	7.23742	0.0206384	k9me2_wt_r1_peaks_unique	147.065	154.829
3	16526889	16528750	931	0.13892	7.50435	0.0134038	k9me2_wt_r1_peaks_unique	190.522	173.031
3	16847182	16848824	821	0.22709	7.30373	0.00837174	k9me2_wt_r1_peaks_unique	170.932	146.036
3	16974469	16974893	212	-0.08977	7.1277	0.0212559	k9me2_wt_r1_peaks_unique	135.563	144.266
3	17035221	17035764	272	0.0543	7.23457	0.022044	k9me2_wt_r1_peaks_unique	153.46	147.792
3	17076611	17077270	330	-0.08295	7.04028	0.0223981	k9me2_wt_r1_peaks_unique	127.894	135.463
3	17299499	17300414	458	0.32311	7.0136	0.00493993	k9me2_wt_r1_peaks_unique	144.523	115.524
3	17741168	17742193	513	0.05305	7.40143	0.0205622	k9me2_wt_r1_peaks_unique	172.202	165.985
3	17775566	17776359	397	0.09269	7.29333	0.0191934	k9me2_wt_r1_peaks_unique	161.98	151.901
3	18243544	18243974	215	0.14907	6.46403	0.0238482	k9me2_wt_r1_peaks_unique	92.9617	83.8358
3	18254965	18255486	261	0.27922	6.69131	0.0105957	k9me2_wt_r1_peaks_unique	113.844	93.812
3	18308656	18309235	290	0.17431	6.83272	0.0171987	k9me2_wt_r1_peaks_unique	121.085	107.304
3	18831142	18831617	238	-0.20158	7.25865	0.011113	k9me2_wt_r1_peaks_unique	142.801	164.215
3	19764873	19765267	197	0.00868	7.12315	0.0238201	k9me2_wt_r1_peaks_unique	139.826	138.987
3	19959728	19960462	367	-0.0361	7.1189	0.0232297	k9me2_wt_r1_peaks_unique	137.268	140.746
3	20188739	20189125	193	0.09004	6.87483	0.0234327	k9me2_wt_r1_peaks_unique	121.083	113.757
3	20787519	20787909	195	0.22978	6.66658	0.0149321	k9me2_wt_r1_peaks_unique	110.008	93.8113
3	21585749	21586808	530	-0.22962	7.10393	0.0100056	k9me2_wt_r1_peaks_unique	127.038	148.956
3	21846882	21847527	323	-0.33053	7.12008	0.00383632	k9me2_wt_r1_peaks_unique	124.053	155.994
3	22119286	22119689	202	0.24896	6.71182	0.012748	k9me2_wt_r1_peaks_unique	114.27	96.1583
3	22509114	22510513	700	-0.11007	7.10575	0.0200287	k9me2_wt_r1_peaks_unique	132.58	143.091
3	23067195	23068053	429	0.10129	6.95302	0.0222548	k9me2_wt_r1_peaks_unique	128.326	119.625
2	53033	54432	700	-0.17854	8.18042	0.00543551	k9me2_wt_r1_peaks_unique	272.696	308.62
2	238300	238996	348	-0.16318	6.92312	0.0180796	k9me2_wt_r1_peaks_unique	114.685	128.419
2	500881	501360	240	0.23645	6.49762	0.0159484	k9me2_wt_r1_peaks_unique	98.0771	83.251
2	612673	613334	331	0.13069	7.20836	0.0166549	k9me2_wt_r1_peaks_unique	154.74	141.339
2	635481	636350	435	-0.0903	7.10972	0.0207013	k9me2_wt_r1_peaks_unique	133.859	142.505
2	677023	678144	561	0.2879	7.22583	0.00514794	k9me2_wt_r1_peaks_unique	165.396	135.475
2	1126809	1127142	167	0.11181	6.76955	0.0233191	k9me2_wt_r1_peaks_unique	113.414	104.956
2	1167597	1167881	142	0.0638	6.84674	0.0248447	k9me2_wt_r1_peaks_unique	117.673	112.583
2	1176575	1177470	448	-0.01347	7.11207	0.0239055	k9me2_wt_r1_peaks_unique	137.695	138.987
2	1215052	1215765	357	0.1685	7.20919	0.0142385	k9me2_wt_r1_peaks_unique	156.872	139.579
2	1290305	1291067	381	-0.15598	6.97215	0.01704	k9me2_wt_r1_peaks_unique	118.946	132.527
2	1372717	1373118	201	0.08897	6.82894	0.0237544	k9me2_wt_r1_peaks_unique	117.248	110.236
2	1523624	1524008	192	0.3426	6.72302	0.0063179	k9me2_wt_r1_peaks_unique	118.959	93.8133
2	1926999	1927374	188	0.11939	6.57479	0.0244444	k9me2_wt_r1_peaks_unique	99.3525	91.4617
2	1968479	1969119	320	0.23759	6.81626	0.0129752	k9me2_wt_r1_peaks_unique	122.366	103.786
2	2152761	2153325	282	0.05923	7.02116	0.0230702	k9me2_wt_r1_peaks_unique	132.585	127.252
2	2247810	2248115	153	-0.09142	7.07307	0.0209158	k9me2_wt_r1_peaks_unique	130.451	138.984
2	2319177	2319946	385	0.21385	7.11834	0.0108491	k9me2_wt_r1_peaks_unique	149.631	129.017
2	2321339	2321665	163	-0.02267	6.82586	0.0263916	k9me2_wt_r1_peaks_unique	112.558	114.341
2	2356698	2357523	413	0.05973	7.17883	0.0220025	k9me2_wt_r1_peaks_unique	147.922	141.923
2	2894000	2894425	213	0.17239	6.73385	0.0183917	k9me2_wt_r1_peaks_unique	112.99	100.264
2	4103464	4103939	238	-0.04164	6.99052	0.0242349	k9me2_wt_r1_peaks_unique	125.34	129.01
2	4759829	4762700	1436	-0.09416	7.08383	0.0208616	k9me2_wt_r1_peaks_unique	131.302	140.158
2	4764308	4764915	304	0.09451	7.08465	0.0208616	k9me2_wt_r1_peaks_unique	140.255	131.361
2	5588701	5591226	1263	0.13083	7.18426	0.0174933	k9me2_wt_r1_peaks_unique	152.184	138.991
2	5685358	5686094	368	-0.05236	7.17546	0.0224577	k9me2_wt_r1_peaks_unique	141.954	147.201
2	5687522	5687957	218	-0.04962	7.09398	0.0230472	k9me2_wt_r1_peaks_unique	134.286	138.985
2	5750477	5752217	870	0.28302	6.96392	0.00726435	k9me2_wt_r1_peaks_unique	137.704	113.175
2	5761206	5761975	385	0.08612	6.91684	0.0231994	k9me2_wt_r1_peaks_unique	124.491	117.277
2	5842451	5842935	242	0.04099	6.80494	0.0261545	k9me2_wt_r1_peaks_unique	113.412	110.235
2	6185921	6187059	569	0.27152	7.13402	0.00717749	k9me2_wt_r1_peaks_unique	154.32	127.846
2	6316804	6318116	656	0.17588	7.22496	0.013431	k9me2_wt_r1_peaks_unique	159.002	140.753
2	6924164	6924594	215	0.27952	6.57891	0.0124059	k9me2_wt_r1_peaks_unique	105.323	86.7715
2	6986172	6986644	236	0.19481	6.72808	0.0172692	k9me2_wt_r1_peaks_unique	113.416	99.0905
2	7073089	7073387	149	0.19319	6.76105	0.0161393	k9me2_wt_r1_peaks_unique	115.973	101.438
2	7146119	7147861	871	0.19297	7.19696	0.0117952	k9me2_wt_r1_peaks_unique	156.872	137.232
2	7153627	7153949	161	0.11772	6.12114	0.0296219	k9me2_wt_r1_peaks_unique	72.5046	66.8233
2	7178282	7178631	175	0.19463	6.78659	0.0161426	k9me2_wt_r1_peaks_unique	118.103	103.198
2	7193143	7193775	316	-0.07575	7.6019	0.0177986	k9me2_wt_r1_peaks_unique	189.234	199.435
2	7264620	7265225	303	-0.24793	7.15597	0.00863042	k9me2_wt_r1_peaks_unique	130.871	155.41
2	7327884	7328304	210	-0.07035	7.13153	0.0217989	k9me2_wt_r1_peaks_unique	136.841	143.679
2	7475577	7476275	349	-0.24829	7.22493	0.00747656	k9me2_wt_r1_peaks_unique	137.262	163.039
2	7681034	7682180	573	0.05694	7.11651	0.0224118	k9me2_wt_r1_peaks_unique	141.532	136.054
2	7729630	7730197	284	0.15275	6.99285	0.0179392	k9me2_wt_r1_peaks_unique	134.292	120.8
2	7999034	7999426	196	-0.05648	7.20751	0.0218059	k9me2_wt_r1_peaks_unique	144.936	150.722
2	8102851	8103264	207	0.01139	6.6533	0.0280348	k9me2_wt_r1_peaks_unique	101.055	100.26
2	8151810	8153273	732	0.02181	7.12972	0.0236511	k9me2_wt_r1_peaks_unique	141.105	138.988
2	8590008	8592455	1224	-0.07205	7.11885	0.0218632	k9me2_wt_r1_peaks_unique	135.564	142.506
2	8596716	8597563	424	-0.11041	7.23021	0.0188038	k9me2_wt_r1_peaks_unique	144.508	156.001
2	8602560	8602876	158	0.03718	7.0688	0.0238997	k9me2_wt_r1_peaks_unique	135.993	132.533
2	8827361	8828462	551	-0.26827	7.23043	0.00627895	k9me2_wt_r1_peaks_unique	136.835	164.799
2	9161411	9161809	199	0.18798	6.8157	0.0172094	k9me2_wt_r1_peaks_unique	120.233	105.545
2	9286603	9288006	702	-0.08512	7.24287	0.0200431	k9me2_wt_r1_peaks_unique	147.065	156.003
2	9346963	9347420	229	-0.15995	6.96376	0.0170551	k9me2_wt_r1_peaks_unique	118.093	131.94
2	9496378	9496873	248	-0.02529	6.99212	0.0248119	k9me2_wt_r1_peaks_unique	126.192	128.423
2	9557438	9558074	318	-0.00289	7.20595	0.0231685	k9me2_wt_r1_peaks_unique	147.493	147.789
2	9692480	9693121	321	0.35389	6.5359	0.00710994	k9me2_wt_r1_peaks_unique	104.898	82.0798
2	10467579	10468311	366	0.11994	6.78166	0.0223343	k9me2_wt_r1_peaks_unique	114.693	105.543
2	10533738	10534040	151	-0.07905	6.84857	0.0243069	k9me2_wt_r1_peaks_unique	112.131	118.447
2	11286136	11286420	142	-0.03733	6.49638	0.0293678	k9me2_wt_r1_peaks_unique	89.1223	91.4585
2	11788118	11790557	1220	-0.07035	7.13153	0.0217989	k9me2_wt_r1_peaks_unique	136.841	143.679
2	13267721	13268439	359	0.25996	6.7435	0.0117707	k9me2_wt_r1_peaks_unique	117.253	97.9192
2	13407585	13408187	301	-0.01251	7.00509	0.024813	k9me2_wt_r1_peaks_unique	127.897	129.011
2	13501748	13502993	623	-0.06477	7.22011	0.0217416	k9me2_wt_r1_peaks_unique	145.788	152.482
2	13907331	13907839	254	0.23108	6.64907	0.0149133	k9me2_wt_r1_peaks_unique	108.73	92.6379
2	14062965	14063420	228	0.11643	6.60081	0.0242751	k9me2_wt_r1_peaks_unique	101.057	93.2218
2	14334637	14335080	222	0.53488	6.42777	0.00163814	k9me2_wt_r1_peaks_unique	103.624	71.5227
2	14554031	14555222	596	0.27834	7.04867	0.00687718	k9me2_wt_r1_peaks_unique	145.799	120.217
2	14811716	14812392	338	0.33581	6.67379	0.00688426	k9me2_wt_r1_peaks_unique	114.698	90.8796
2	15652057	15653668	806	-0.10135	7.21287	0.0188789	k9me2_wt_r1_peaks_unique	143.231	153.654
2	16379851	16380352	251	0.17475	6.66586	0.0196311	k9me2_wt_r1_peaks_unique	107.876	95.5699
2	16384430	16384799	185	-0.18546	7.09151	0.0142315	k9me2_wt_r1_peaks_unique	127.892	145.436
2	16626113	16626440	164	-0.0065	6.54836	0.0290572	k9me2_wt_r1_peaks_unique	93.3844	93.8061
2	16720975	16722342	684	0.02764	7.21549	0.0227828	k9me2_wt_r1_peaks_unique	150.051	147.204
2	17253811	17254453	321	0.31103	6.64265	0.00941563	k9me2_wt_r1_peaks_unique	111.289	89.7061
2	17280308	17280606	149	-0.16168	7.17717	0.0150734	k9me2_wt_r1_peaks_unique	136.838	153.066
2	17289126	17290219	547	-0.12405	7.09876	0.0185309	k9me2_wt_r1_peaks_unique	131.301	143.091
2	18594385	18594844	230	-0.13231	6.86417	0.0201576	k9me2_wt_r1_peaks_unique	111.277	121.965
2	19220158	19220449	146	-0.09653	6.91637	0.022457	k9me2_wt_r1_peaks_unique	116.817	124.9
5	45525	46350	413	-0.31556	7.17561	0.00449358	k9me2_wt_r1_peaks_unique	129.592	161.276
5	490394	490821	214	0.22106	6.57863	0.0172973	k9me2_wt_r1_peaks_unique	103.19	88.5303
5	1630727	1631292	283	0.02628	7.06972	0.0238997	k9me2_wt_r1_peaks_unique	135.567	133.12
5	1897177	1897957	390	0.34169	6.85194	0.00547979	k9me2_wt_r1_peaks_unique	130.038	102.615
5	2115159	2115654	248	-0.17475	7.1427	0.0142407	k9me2_wt_r1_peaks_unique	133.004	150.131
5	2230082	2231555	737	0.13118	7.1222	0.0176445	k9me2_wt_r1_peaks_unique	145.794	133.122
5	2425947	2426753	403	0.01091	7.17807	0.0234065	k9me2_wt_r1_peaks_unique	145.364	144.269
5	2470810	2471961	576	-0.22497	7.19978	0.00948776	k9me2_wt_r1_peaks_unique	135.984	158.932
5	3006034	3007338	652	0.01337	7.28671	0.0224238	k9me2_wt_r1_peaks_unique	156.867	155.42
5	3114922	3115697	388	0.08184	7.01911	0.0225378	k9me2_wt_r1_peaks_unique	133.438	126.08
5	3218294	3218628	167	-0.08556	7.22627	0.0201406	k9me2_wt_r1_peaks_unique	145.36	154.242
5	3638891	3639174	142	-0.09614	7.0707	0.0209158	k9me2_wt_r1_peaks_unique	130.024	138.984
5	4781095	4781436	171	0.26534	6.50187	0.0146597	k9me2_wt_r1_peaks_unique	99.3563	82.6647
5	4808647	4809218	286	-0.26116	7.1051	0.00777015	k9me2_wt_r1_peaks_unique	125.759	150.715
5	4882432	4882985	277	-0.13828	7.18333	0.0174933	k9me2_wt_r1_peaks_unique	138.543	152.479
5	5428636	5429252	308	0.14842	6.67902	0.0207442	k9me2_wt_r1_peaks_unique	107.876	97.3298
5	5477683	5478765	541	-0.04808	7.12489	0.0228207	k9me2_wt_r1_peaks_unique	137.268	141.92
5	5701730	5702283	277	0.11978	6.71594	0.0226602	k9me2_wt_r1_peaks_unique	109.579	100.849
5	5739342	5740489	574	-0.00391	7.23942	0.0229376	k9me2_wt_r1_peaks_unique	150.902	151.311
5	5977457	5977967	255	0.17458	6.49685	0.0212333	k9me2_wt_r1_peaks_unique	95.9453	85.01
5	6341248	6341640	196	0.03393	7.01514	0.0243402	k9me2_wt_r1_peaks_unique	130.88	127.838
5	6501501	6501809	154	-0.08181	7.26607	0.0204787	k9me2_wt_r1_peaks_unique	149.621	158.35
5	6858783	6859622	420	0.11222	7.13167	0.0191855	k9me2_wt_r1_peaks_unique	145.793	134.883
5	7160811	7161376	283	-0.37424	7.15671	0.00217037	k9me2_wt_r1_peaks_unique	125.33	162.448
5	7611303	7612082	390	-0.1999	7.16906	0.0117503	k9me2_wt_r1_peaks_unique	134.281	154.238
5	8246120	8247066	473	0.00928	7.18311	0.0233264	k9me2_wt_r1_peaks_unique	145.79	144.855
5	8538712	8538995	142	0.09653	6.67034	0.025552	k9me2_wt_r1_peaks_unique	105.318	98.5016
5	8766627	8767152	263	0.2122	6.4125	0.0186301	k9me2_wt_r1_peaks_unique	91.6841	79.1436
5	8852245	8852528	142	-0.12847	7.2048	0.0174426	k9me2_wt_r1_peaks_unique	141.099	154.24
5	9013364	9013695	166	0.06404	7.08224	0.022625	k9me2_wt_r1_peaks_unique	138.55	132.534
5	9206575	9207325	375	0.33309	7.18455	0.00363982	k9me2_wt_r1_peaks_unique	163.268	129.607
5	9502013	9503907	947	0.21553	7.2508	0.00960851	k9me2_wt_r1_peaks_unique	164.115	141.341
5	9601763	9603212	725	-0.08261	7.23323	0.0200917	k9me2_wt_r1_peaks_unique	146.213	154.829
5	9639268	9639551	142	0.22762	6.65644	0.0149133	k9me2_wt_r1_peaks_unique	109.156	93.224
5	9747815	9748566	376	0.18617	7.16867	0.013404	k9me2_wt_r1_peaks_unique	153.464	134.885
5	10120486	10120773	144	-0.027	6.99784	0.0247165	k9me2_wt_r1_peaks_unique	126.618	129.01
5	10189094	10189708	307	-0.03398	7.21313	0.0227828	k9me2_wt_r1_peaks_unique	146.641	150.135
5	10494221	10494636	208	0.07347	6.90327	0.0238733	k9me2_wt_r1_peaks_unique	122.786	116.69
5	10534780	10535695	458	0.0882	7.3404	0.0189879	k9me2_wt_r1_peaks_unique	167.092	157.183
5	10537789	10538200	206	0.10063	6.90959	0.0225256	k9me2_wt_r1_peaks_unique	124.492	116.104
5	10654735	10655618	442	0.20806	6.95604	0.0141631	k9me2_wt_r1_peaks_unique	133.442	115.521
5	10920807	10921124	159	0.01782	6.73856	0.0272393	k9me2_wt_r1_peaks_unique	107.446	106.127
5	10935543	10935900	179	0.01184	6.9638	0.0252061	k9me2_wt_r1_peaks_unique	125.341	124.317
5	10942151	10942954	402	-0.10073	7.22962	0.0194909	k9me2_wt_r1_peaks_unique	144.934	155.415
5	10998006	10998462	228	-0.04654	6.90709	0.0248849	k9me2_wt_r1_peaks_unique	118.096	121.968
5	12566266	12566724	229	-0.04256	6.7163	0.0268556	k9me2_wt_r1_peaks_unique	103.61	106.712
5	13081998	13082989	496	0.04944	7.09397	0.0230472	k9me2_wt_r1_peaks_unique	138.976	134.294
5	13199709	13200001	146	0.3136	6.75294	0.00802178	k9me2_wt_r1_peaks_unique	120.237	96.7467
5	13515954	13516469	258	0.27089	6.89674	0.00854861	k9me2_wt_r1_peaks_unique	130.888	108.481
5	13595028	13595753	363	-0.27858	7.11868	0.00647863	k9me2_wt_r1_peaks_unique	126.184	153.062
5	13678069	13678746	339	0.3044	6.60108	0.00924315	k9me2_wt_r1_peaks_unique	107.88	87.3587
5	14105487	14105995	254	-0.09316	7.16079	0.0204413	k9me2_wt_r1_peaks_unique	138.545	147.786
5	14151803	14152357	277	0.03497	6.87674	0.0255054	k9me2_wt_r1_peaks_unique	118.951	116.102
5	14199884	14200802	459	-0.01046	7.05134	0.0244377	k9me2_wt_r1_peaks_unique	132.157	133.119
5	14289462	14290263	401	0.17502	7.2484	0.0126492	k9me2_wt_r1_peaks_unique	161.558	143.101
5	14342332	14344756	1212	0.10558	6.70042	0.0237053	k9me2_wt_r1_peaks_unique	107.874	100.262
5	14362022	14363028	503	0.11737	7.36573	0.0163194	k9me2_wt_r1_peaks_unique	171.78	158.358
5	14385998	14387081	542	0.19646	7.16753	0.0117503	k9me2_wt_r1_peaks_unique	153.89	134.299
5	14436939	14437283	172	0.28803	6.71366	0.00967852	k9me2_wt_r1_peaks_unique	115.975	94.9861
5	14694642	14695926	642	-0.13072	7.21461	0.0174173	k9me2_wt_r1_peaks_unique	141.951	155.414
5	14760108	14760549	221	-0.07344	6.65246	0.0264177	k9me2_wt_r1_peaks_unique	98.07	103.191
5	15003358	15003700	171	0.1196	6.64709	0.0240266	k9me2_wt_r1_peaks_unique	104.466	96.155
5	15341492	15341875	192	0.12825	6.69478	0.0227936	k9me2_wt_r1_peaks_unique	108.301	99.0891
5	15401528	15402010	241	0.10839	6.94948	0.0215369	k9me2_wt_r1_peaks_unique	128.326	119.039
5	15653329	15653668	170	-0.04966	7.07557	0.0235508	k9me2_wt_r1_peaks_unique	132.582	137.225
5	15662792	15663431	320	0.08482	7.48217	0.0183304	k9me2_wt_r1_peaks_unique	184.13	173.616
5	15802167	15802788	311	-0.03797	7.1769	0.0227718	k9me2_wt_r1_peaks_unique	142.806	146.615
5	15806233	15806902	335	-0.13822	7.13824	0.016786	k9me2_wt_r1_peaks_unique	134.283	147.784
5	16120519	16121032	257	0.16147	6.72839	0.0195141	k9me2_wt_r1_peaks_unique	112.138	100.264
5	16357265	16357828	282	0.20297	6.67998	0.0172857	k9me2_wt_r1_peaks_unique	110.008	95.5706
5	16716536	16717040	252	0.00278	7.07691	0.0242564	k9me2_wt_r1_peaks_unique	135.139	134.879
5	16742938	16744110	586	-0.20275	7.12869	0.0116836	k9me2_wt_r1_peaks_unique	130.447	150.13
5	16755652	16756106	227	-0.14921	7.2108	0.0158542	k9me2_wt_r1_peaks_unique	140.672	156
5	16871497	16871833	168	0.04622	6.59267	0.0280217	k9me2_wt_r1_peaks_unique	98.0727	94.9805
5	16970875	16971912	519	0.01968	6.97451	0.0249084	k9me2_wt_r1_peaks_unique	126.619	124.903
5	17028975	17029313	169	0.19165	6.79327	0.0161433	k9me2_wt_r1_peaks_unique	118.529	103.784
5	17042271	17042554	142	0.19737	6.67718	0.0172857	k9me2_wt_r1_peaks_unique	109.582	95.5706
5	17350972	17351303	166	-0.15312	7.13651	0.0159527	k9me2_wt_r1_peaks_unique	133.431	148.371
5	17365770	17366087	159	0.01149	6.79783	0.0266257	k9me2_wt_r1_peaks_unique	111.707	110.821
5	17479726	17480751	513	0.04552	6.93218	0.0246938	k9me2_wt_r1_peaks_unique	124.064	120.211
5	17482281	17482637	178	0.06902	6.84935	0.0248447	k9me2_wt_r1_peaks_unique	118.1	112.583
5	17617494	17617969	238	0.10537	6.68333	0.0237846	k9me2_wt_r1_peaks_unique	106.596	99.0884
5	18011447	18012424	489	0.19359	7.37688	0.00988931	k9me2_wt_r1_peaks_unique	177.746	155.426
5	18033608	18034039	216	-0.04197	7.08557	0.0234693	k9me2_wt_r1_peaks_unique	133.86	137.812
5	18104280	18105039	380	0.07123	6.90939	0.0238733	k9me2_wt_r1_peaks_unique	123.213	117.277
5	18152881	18153935	527	-0.18059	7.01006	0.0151325	k9me2_wt_r1_peaks_unique	121.076	137.221
5	18207817	18208150	167	0.19182	7.22086	0.0126252	k9me2_wt_r1_peaks_unique	159.429	139.58
5	18235772	18236754	491	-0.25878	7.1614	0.00728152	k9me2_wt_r1_peaks_unique	130.872	156.584
5	18420749	18421092	172	-0.09582	6.93691	0.0223217	k9me2_wt_r1_peaks_unique	118.521	126.66
5	18554692	18556263	786	0.29482	7.07788	0.00573494	k9me2_wt_r1_peaks_unique	149.634	121.977
5	18808927	18809333	203	0.05458	7.01884	0.0236026	k9me2_wt_r1_peaks_unique	132.159	127.252
5	19439208	19439633	213	0.04379	6.75951	0.0264981	k9me2_wt_r1_peaks_unique	110.003	106.715
5	19476497	19477308	406	0.00519	7.05279	0.0244377	k9me2_wt_r1_peaks_unique	133.009	132.532
5	19493827	19494402	288	0.0659	7.01783	0.0230702	k9me2_wt_r1_peaks_unique	132.586	126.666
5	19516794	19518092	649	-0.31368	7.29734	0.00360855	k9me2_wt_r1_peaks_unique	141.093	175.361
5	19741160	19741662	251	0.08857	6.57776	0.0270114	k9me2_wt_r1_peaks_unique	98.4995	92.6343
5	19891535	19891848	157	-0.14413	7.07085	0.0177689	k9me2_wt_r1_peaks_unique	127.892	141.329
5	19903139	19904317	589	0.09345	7.03161	0.0218019	k9me2_wt_r1_peaks_unique	135.142	126.666
5	19965133	19965850	359	-0.09472	7.24348	0.0194047	k9me2_wt_r1_peaks_unique	146.638	156.589
5	20183305	20185873	1284	-0.21607	7.11638	0.0108491	k9me2_wt_r1_peaks_unique	128.743	149.543
5	20280289	20281265	488	0.36408	7.02675	0.00310774	k9me2_wt_r1_peaks_unique	147.932	114.938
5	20527005	20527297	146	0.09055	6.38337	0.0286143	k9me2_wt_r1_peaks_unique	86.142	80.9015
5	20575874	20576209	168	0.11851	6.31114	0.0271023	k9me2_wt_r1_peaks_unique	82.7332	76.2088
5	20594610	20595185	288	0.0332	7.2411	0.0225632	k9me2_wt_r1_peaks_unique	153.033	149.552
5	20596387	20598144	879	0.24991	7.45853	0.00545097	k9me2_wt_r1_peaks_unique	191.803	161.297
5	20609246	20609562	158	-0.20542	6.41228	0.0200465	k9me2_wt_r1_peaks_unique	79.3177	91.455
5	20836431	20837835	702	-0.07323	7.21588	0.0213038	k9me2_wt_r1_peaks_unique	144.935	152.482
5	21251928	21252487	280	-0.17522	7.17039	0.0142418	k9me2_wt_r1_peaks_unique	135.559	153.065
5	21776326	21776648	161	0.15625	6.83156	0.0192689	k9me2_wt_r1_peaks_unique	120.233	107.891
5	21814866	21815421	278	0.08538	7.06713	0.0216156	k9me2_wt_r1_peaks_unique	138.124	130.187
5	22621223	22621603	190	0.23091	6.96747	0.0113791	k9me2_wt_r1_peaks_unique	135.573	115.521
5	23361889	23362284	198	0.19418	6.94909	0.0151301	k9me2_wt_r1_peaks_unique	132.163	115.52
5	23738983	23739323	170	-0.2094	6.98325	0.0132414	k9me2_wt_r1_peaks_unique	117.666	136.046
5	23748993	23750910	959	0.15848	7.12949	0.0159527	k9me2_wt_r1_peaks_unique	147.926	132.537
5	23777426	23778404	489	-0.0296	7.19831	0.0229329	k9me2_wt_r1_peaks_unique	145.362	148.376
5	24168545	24169061	258	0.00035	7.14912	0.023652	k9me2_wt_r1_peaks_unique	141.956	141.921
5	24331790	24332373	292	-0.14839	7.16152	0.0159173	k9me2_wt_r1_peaks_unique	135.987	150.719
5	24896734	24897142	204	-0.07783	7.19682	0.020857	k9me2_wt_r1_peaks_unique	142.805	150.721
5	25000757	25002184	714	-0.03674	7.2061	0.0225527	k9me2_wt_r1_peaks_unique	145.788	149.549
5	25507603	25507893	145	-0.11546	7.21131	0.0181797	k9me2_wt_r1_peaks_unique	142.378	154.241
5	26401820	26402574	377	-0.08343	7.14256	0.0211976	k9me2_wt_r1_peaks_unique	137.267	145.439
4	501639	502444	403	-0.12753	7.22165	0.0173919	k9me2_wt_r1_peaks_unique	142.803	156.001
4	667666	668139	237	0.08355	7.23191	0.0200917	k9me2_wt_r1_peaks_unique	154.738	146.031
4	869137	869657	260	0.29239	6.79389	0.00817622	k9me2_wt_r1_peaks_unique	122.793	100.266
4	964919	965286	184	0.23943	6.88878	0.0111768	k9me2_wt_r1_peaks_unique	128.756	109.067
4	1000506	1001188	341	0.32518	6.76746	0.00648584	k9me2_wt_r1_peaks_unique	121.942	97.3339
4	1160722	1161409	344	-0.18271	7.10448	0.0133626	k9me2_wt_r1_peaks_unique	129.17	146.61
4	1209560	1209921	181	0.10994	7.11158	0.0192637	k9me2_wt_r1_peaks_unique	143.664	133.122
4	1288445	1289939	747	0.06846	7.29783	0.0207843	k9me2_wt_r1_peaks_unique	161.128	153.66
4	1438565	1439199	317	0.20656	6.71678	0.0161287	k9me2_wt_r1_peaks_unique	112.991	97.9179
4	1543684	1544196	256	-0.10444	7.20581	0.0189167	k9me2_wt_r1_peaks_unique	142.379	153.068
4	1588656	1588980	162	-0.11937	7.1011	0.019303	k9me2_wt_r1_peaks_unique	131.728	143.091
4	1757227	1757510	142	-0.13395	6.92451	0.0199499	k9me2_wt_r1_peaks_unique	115.964	127.247
4	1778800	1779405	303	0.11152	7.04066	0.0203112	k9me2_wt_r1_peaks_unique	136.847	126.667
4	2232040	2232841	401	0.09902	6.95894	0.0214785	k9me2_wt_r1_peaks_unique	128.752	120.211
4	2401927	2402330	202	-0.09216	6.94542	0.0223217	k9me2_wt_r1_peaks_unique	119.374	127.248
4	2409486	2410001	258	0.20411	6.80764	0.0150671	k9me2_wt_r1_peaks_unique	120.233	104.372
4	2521246	2521604	179	0.10657	6.78297	0.0232438	k9me2_wt_r1_peaks_unique	114.266	106.13
4	2560419	2560860	221	-0.0048	6.96227	0.0252061	k9me2_wt_r1_peaks_unique	124.489	124.903
4	2613804	2614488	342	0.08808	7.08786	0.0214938	k9me2_wt_r1_peaks_unique	140.254	131.947
4	2763102	2763652	275	0.17763	6.88096	0.0171518	k9me2_wt_r1_peaks_unique	125.346	110.825
4	2773649	2775062	707	0.13401	7.02492	0.0187568	k9me2_wt_r1_peaks_unique	136.421	124.32
4	3360671	3361310	320	0.16601	7.01343	0.0160628	k9me2_wt_r1_peaks_unique	136.848	121.974
4	3768169	3769130	481	0.09597	7.16072	0.0198003	k9me2_wt_r1_peaks_unique	147.923	138.403
4	4205730	4207215	743	0.10639	7.17204	0.019031	k9me2_wt_r1_peaks_unique	149.628	138.991
4	5363294	5363577	142	-0.244	7.16337	0.0086606	k9me2_wt_r1_peaks_unique	131.724	155.997
4	5444976	5445985	505	-0.22326	7.2478	0.00960851	k9me2_wt_r1_peaks_unique	140.67	164.214
4	5671054	5671595	271	0.08889	7.02933	0.0218019	k9me2_wt_r1_peaks_unique	134.716	126.666
4	5782813	5783479	333	0.38076	6.84653	0.00377228	k9me2_wt_r1_peaks_unique	131.317	100.856
4	5808474	5808873	200	-0.02522	6.74858	0.0271132	k9me2_wt_r1_peaks_unique	106.593	108.473
4	5844669	5845028	180	0.04445	6.44166	0.0298571	k9me2_wt_r1_peaks_unique	88.2721	85.5938
4	5921564	5922611	524	0.05968	6.92511	0.024289	k9me2_wt_r1_peaks_unique	124.065	119.037
4	5978527	5979382	428	-0.15778	7.03376	0.0169606	k9me2_wt_r1_peaks_unique	124.058	138.395
4	6033968	6034304	168	-0.04498	7.04041	0.0238005	k9me2_wt_r1_peaks_unique	129.6	133.704
4	6037624	6037956	166	-0.02149	6.863	0.0260518	k9me2_wt_r1_peaks_unique	115.541	117.274
4	6113003	6115386	1192	0.02441	7.1371	0.0235685	k9me2_wt_r1_peaks_unique	141.956	139.575
4	6163184	6163931	374	-0.12771	7.11457	0.0184666	k9me2_wt_r1_peaks_unique	132.58	144.851
4	6179018	6179312	147	0.22136	6.47987	0.0186133	k9me2_wt_r1_peaks_unique	96.3725	82.6642
4	6252601	6252958	179	0.16827	6.37979	0.024219	k9me2_wt_r1_peaks_unique	88.2745	78.5563
4	6429189	6429562	187	0.20467	6.75	0.0150237	k9me2_wt_r1_peaks_unique	115.547	100.264
4	6908634	6908945	156	0.4588	6.08813	0.00590063	k9me2_wt_r1_peaks_unique	79.7565	58.0301
4	6980259	6980590	166	-0.09761	7.15856	0.0198003	k9me2_wt_r1_peaks_unique	138.118	147.786
4	6982524	6983339	408	-0.15748	7.05817	0.0160268	k9me2_wt_r1_peaks_unique	126.188	140.742
4	7012867	7013207	170	-0.00464	7.06691	0.0243466	k9me2_wt_r1_peaks_unique	133.861	134.292
4	7905654	7906428	387	0.04877	7.08097	0.0231241	k9me2_wt_r1_peaks_unique	137.697	133.12
4	8223726	8224397	336	-0.13404	7.2292	0.0166165	k9me2_wt_r1_peaks_unique	143.229	157.174
4	8421339	8421780	221	0.13566	6.82125	0.0202831	k9me2_wt_r1_peaks_unique	118.528	107.89
4	8556949	8558095	573	-0.29807	7.28081	0.00438362	k9me2_wt_r1_peaks_unique	140.242	172.427
4	8596884	8597363	240	0.03828	7.05005	0.024073	k9me2_wt_r1_peaks_unique	134.288	130.772
4	8599570	8600885	658	-0.11348	7.16204	0.0190694	k9me2_wt_r1_peaks_unique	137.692	148.96
4	8676693	8677177	242	-0.0192	7.09696	0.0239045	k9me2_wt_r1_peaks_unique	135.99	137.812
4	8945449	8946235	393	-0.04959	7.11215	0.0228955	k9me2_wt_r1_peaks_unique	135.99	140.745
4	8959747	8960042	148	-0.08592	6.98791	0.0220576	k9me2_wt_r1_peaks_unique	123.208	130.768
4	9019504	9019822	159	-0.20377	7.10545	0.0116472	k9me2_wt_r1_peaks_unique	128.317	147.783
4	9284185	9284637	226	0.30114	6.67495	0.00952434	k9me2_wt_r1_peaks_unique	113.419	92.0522
4	9439536	9440224	344	0.33945	6.58925	0.00824773	k9me2_wt_r1_peaks_unique	108.306	85.5992
4	9521915	9522508	297	0.04552	6.93218	0.0246938	k9me2_wt_r1_peaks_unique	124.064	120.211
4	9801859	9802919	530	0.09332	7.231	0.0194909	k9me2_wt_r1_peaks_unique	155.165	145.446
4	9807014	9808091	539	0.02852	7.19857	0.0229329	k9me2_wt_r1_peaks_unique	148.347	145.443
4	10205789	10207259	735	-0.13184	7.21949	0.0166357	k9me2_wt_r1_peaks_unique	142.377	156.001
4	10400750	10401564	407	0.07531	7.09425	0.0220594	k9me2_wt_r1_peaks_unique	140.255	133.121
4	10872901	10873491	295	-0.08209	7.1374	0.0211976	k9me2_wt_r1_peaks_unique	136.841	144.853
4	11051834	11053888	1027	0.16895	7.57694	0.0108401	k9me2_wt_r1_peaks_unique	202.449	180.076
4	11092895	11093380	243	-0.06399	7.59927	0.0186417	k9me2_wt_r1_peaks_unique	189.66	198.262
4	11224491	11224817	163	0.26576	6.56224	0.0123613	k9me2_wt_r1_peaks_unique	103.617	86.1847
4	11342719	11343720	501	-0.07976	7.10904	0.0213739	k9me2_wt_r1_peaks_unique	134.286	141.919
4	11999814	12000940	563	0.04961	7.17972	0.0227718	k9me2_wt_r1_peaks_unique	147.495	142.51
4	12031447	12031978	266	-0.06176	7.10004	0.0225533	k9me2_wt_r1_peaks_unique	134.286	140.159
4	12129459	12130783	662	-0.19814	7.26552	0.0111284	k9me2_wt_r1_peaks_unique	143.654	164.802
4	12630832	12631216	192	-0.10705	7.17657	0.019031	k9me2_wt_r1_peaks_unique	139.396	150.133
4	12638853	12639629	388	-0.11978	7.20915	0.0181797	k9me2_wt_r1_peaks_unique	141.952	154.241
4	12904884	12905554	335	-0.07896	7.14479	0.0217352	k9me2_wt_r1_peaks_unique	137.693	145.439
4	13039625	13040246	311	0.08644	7.02141	0.0218651	k9me2_wt_r1_peaks_unique	133.865	126.08
4	13123980	13124277	149	0.19431	6.19696	0.0249803	k9me2_wt_r1_peaks_unique	78.4725	68.5842
4	13472867	13474221	677	-0.13248	7.13538	0.0176194	k9me2_wt_r1_peaks_unique	134.284	147.199
4	13537612	13537930	159	0.03972	6.91512	0.0251985	k9me2_wt_r1_peaks_unique	122.359	119.036
4	13757375	13758632	629	-0.08758	7.09915	0.0214336	k9me2_wt_r1_peaks_unique	133.007	141.332
4	13928292	13929003	356	-0.10958	7.08214	0.0193821	k9me2_wt_r1_peaks_unique	130.45	140.744
4	14151995	14153441	723	0.05602	7.22969	0.0216778	k9me2_wt_r1_peaks_unique	153.033	147.205
4	14531577	14532094	259	0.04186	7.25671	0.0222012	k9me2_wt_r1_peaks_unique	155.163	150.726
4	14978463	14978756	147	-0.08432	7.16521	0.0204413	k9me2_wt_r1_peaks_unique	139.396	147.786
4	15433800	15435212	706	-0.04803	7.19478	0.0223172	k9me2_wt_r1_peaks_unique	144.084	148.961
4	16516624	16517179	278	0.00687	6.86996	0.0260518	k9me2_wt_r1_peaks_unique	117.246	116.689
4	16868806	16869723	459	-0.131	7.25741	0.0165582	k9me2_wt_r1_peaks_unique	146.211	160.109
4	17057237	17058488	626	-0.1296	7.20972	0.0174173	k9me2_wt_r1_peaks_unique	141.526	154.828
4	17449146	17450040	447	0.32132	6.83347	0.00674964	k9me2_wt_r1_peaks_unique	127.48	102.027
4	18102558	18103492	467	-0.2279	7.18762	0.00946216	k9me2_wt_r1_peaks_unique	134.706	157.758
4	18106252	18106667	208	-0.21796	7.18721	0.0102049	k9me2_wt_r1_peaks_unique	135.132	157.171
Pt	100925	102346	708	-0.27893	7.9145	0.001859	merged_common_peaks	219.038	265.757
Pt	104692	107390	1346	-0.21246	8.02531	0.00438325	merged_common_peaks	242.036	280.438
Pt	131280	133993	1355	-0.16906	8.02878	0.00696591	merged_common_peaks	246.296	276.917
Pt	136303	137692	695	-0.26498	7.92148	0.00226241	merged_common_peaks	221.167	265.758
1	17978	18479	237	0.01689	6.99998	0.0247165	merged_common_peaks	128.75	127.251
1	238504	239179	328	0.06847	7.19508	0.0214245	merged_common_peaks	150.052	143.097
1	257739	258597	414	0.08483	7.54422	0.0175591	merged_common_peaks	192.223	181.246
1	431414	433738	1161	0.08152	8.09484	0.0138851	merged_common_peaks	281.229	265.778
1	499897	500830	421	0.06985	7.17792	0.0215472	merged_common_peaks	148.348	141.337
1	1441583	1444500	1435	0.04147	8.75373	0.0123113	merged_common_peaks	437.902	425.494
1	1613340	1614585	597	-0.02567	7.68928	0.0194067	merged_common_peaks	204.569	208.242
1	1975300	1976391	546	0.10156	7.50026	0.0165889	merged_common_peaks	187.538	174.79
1	2531471	2534779	1649	-0.08677	8.93105	0.00830033	merged_common_peaks	473.646	503.007
1	2788311	2800682	6226	-0.00043	8.87488	0.0130086	merged_common_peaks	469.397	469.537
1	3073500	3074028	272	0.13919	6.73403	0.0205768	merged_common_peaks	111.711	101.437
1	3343814	3345292	718	0.10044	7.81991	0.0141371	merged_common_peaks	233.962	218.228
1	3360542	3361327	377	-0.15551	7.59557	0.0114774	merged_common_peaks	183.268	204.127
1	3780733	3785842	2562	-0.01769	9.06172	0.0119227	merged_common_peaks	531.113	537.665
1	3826280	3827105	354	0.338	7.40488	0.00208134	merged_common_peaks	190.531	150.736
1	3892852	3894400	739	-0.21476	7.59468	0.00684958	merged_common_peaks	179.433	208.234
1	3898039	3899876	942	-0.00769	7.9581	0.0178681	merged_common_peaks	248.01	249.336
1	4110222	4112846	1295	0.00475	7.89117	0.0182759	merged_common_peaks	237.79	237.008
1	4329898	4334382	2242	0.07536	8.7687	0.00997315	merged_common_peaks	447.697	424.912
1	4405958	4411310	2642	-0.0023	8.60929	0.0142616	merged_common_peaks	390.219	390.842
1	4620713	4621469	298	0.06234	7.14389	0.0217352	merged_common_peaks	144.513	138.402
1	4682641	4685829	1618	0.18907	8.65879	0.00248051	merged_common_peaks	431.532	378.528
1	4830476	4831527	476	-0.05236	7.85902	0.0172794	merged_common_peaks	227.992	236.419
1	5098421	5102078	1805	-0.02907	8.65535	0.0135016	merged_common_peaks	399.158	407.282
1	5679193	5682816	1796	0.07331	8.42241	0.0120273	merged_common_peaks	351.911	334.475
1	5691801	5696631	2415	0.11425	9.12932	0.00483054	merged_common_peaks	582.634	538.273
1	5809420	5810312	508	-0.07454	7.22077	0.0207469	merged_common_peaks	145.361	153.069
1	5911849	5916495	2316	0.00665	8.71828	0.0137118	merged_common_peaks	422.148	420.207
1	5958889	5959413	266	-0.2365	6.89956	0.011208	merged_common_peaks	109.996	129.59
1	6009506	6014097	2277	-0.02785	8.83934	0.0127259	merged_common_peaks	453.643	462.486
1	6156621	6158899	1110	-0.11268	8.30122	0.00968111	merged_common_peaks	303.359	328.002
1	6211256	6211589	167	-0.05278	7.06782	0.0232019	merged_common_peaks	131.729	136.638
1	6273439	6276299	1442	-0.00849	8.50287	0.0147604	merged_common_peaks	361.694	363.829
1	6538451	6543551	2574	0.05853	8.58674	0.0124265	merged_common_peaks	392.352	376.753
1	6588159	6593386	2577	0.13027	8.92759	0.00473365	merged_common_peaks	509.425	465.441
1	6657275	6659683	1191	0.01432	8.49317	0.01476	merged_common_peaks	362.121	358.545
1	6704036	6709605	2848	0.00874	8.47374	0.014862	merged_common_peaks	356.587	354.433
1	6736619	6737145	273	0.05332	6.8415	0.0253824	merged_common_peaks	116.821	112.583
1	6742626	6743943	777	0.07649	7.37177	0.0193947	merged_common_peaks	170.074	161.291
1	7066162	7075893	4880	0.08953	8.37896	0.011449	merged_common_peaks	343.395	322.732
1	7255201	7257160	999	-0.16682	7.52196	0.010782	merged_common_peaks	173.471	194.735
1	7352907	7365186	6135	0.07231	8.83723	0.00987786	merged_common_peaks	468.981	446.054
1	7429926	7432356	1228	-0.02937	8.074	0.0167827	merged_common_peaks	266.745	272.231
1	7435118	7438211	1437	-0.29176	7.64678	0.00247119	merged_common_peaks	181.132	221.73
1	7717563	7722543	2470	-0.02902	8.88917	0.0122888	merged_common_peaks	469.395	478.933
1	7744983	7748034	1598	0.1098	8.12799	0.0109454	merged_common_peaks	290.6	269.304
1	7761207	7762097	409	0.0118	7.47461	0.021011	merged_common_peaks	178.59	177.136
1	7960055	7961205	702	0.2459	7.3015	0.00710624	merged_common_peaks	171.784	144.863
1	7969504	7973926	2226	0.0054	9.12893	0.0118968	merged_common_peaks	560.912	558.816
1	8115528	8116143	322	0.09379	6.67754	0.0247083	merged_common_peaks	105.744	99.0884
1	8276759	8278152	605	0.30844	7.53431	0.00269188	merged_common_peaks	206.29	166.582
1	8319691	8320399	365	-0.13656	7.36162	0.015627	merged_common_peaks	156.861	172.434
1	8388822	8391218	1329	0.00138	7.83486	0.0186719	merged_common_peaks	228.421	228.202
1	8453384	8461681	4146	0.16121	8.76504	0.00340847	merged_common_peaks	460.049	411.411
1	8488706	8492702	2007	0.03647	8.30166	0.0150808	merged_common_peaks	319.549	311.573
1	8644067	8649236	2654	-2e-05	7.97882	0.0177615	merged_common_peaks	252.267	252.271
1	8728935	8733528	2287	0.09946	9.29806	0.00521419	merged_common_peaks	651.576	608.17
1	8765737	8767348	813	0.15066	8.45858	0.00569377	merged_common_peaks	370.649	333.895
1	8771632	8775763	2059	-0.06694	9.20502	0.0085262	merged_common_peaks	576.649	604.036
1	8778227	8781728	1754	0.0489	8.59312	0.0128607	merged_common_peaks	392.778	379.688
1	8786023	8798342	6205	0.04424	9.056	0.0108427	merged_common_peaks	540.488	524.166
1	8800706	8804280	1799	-0.05714	8.62246	0.0120795	merged_common_peaks	386.384	401.994
1	8808613	8812663	2057	-0.02717	9.3395	0.0104813	merged_common_peaks	641.771	653.972
1	8815109	8818613	1753	0.04174	8.51631	0.0137683	merged_common_peaks	371.49	360.896
1	8822952	8827127	2070	0.06567	9.25727	0.00827836	merged_common_peaks	626.037	598.18
1	8829510	8833033	1749	-0.06945	8.57352	0.0116835	merged_common_peaks	371.906	390.247
1	8927671	8933070	2688	-0.03624	9.12767	0.0109284	merged_common_peaks	552.393	566.444
1	9004867	9015803	5405	0.01567	8.80127	0.013161	merged_common_peaks	448.544	443.698
1	9077779	9079365	763	-0.25003	7.39063	0.00624901	merged_common_peaks	153.875	182.993
1	9175399	9177840	1219	0.04601	8.66773	0.012608	merged_common_peaks	413.211	400.241
1	9304826	9305840	509	0.05282	7.7204	0.0179945	merged_common_peaks	214.794	207.072
1	9367856	9373614	2870	0.09717	8.86102	0.00780501	merged_common_peaks	480.904	449.58
1	9574296	9583961	4857	-0.04969	8.77238	0.0118578	merged_common_peaks	429.804	444.865
1	9676489	9691267	7394	0.09309	8.63077	0.00955389	merged_common_peaks	409.385	383.804
1	9706594	9708398	891	-0.0069	8.69119	0.0138433	merged_common_peaks	412.354	414.331
1	9754743	9756435	875	0.23989	7.43768	0.00694195	merged_common_peaks	188.396	159.536
1	9816974	9817697	348	0.22123	6.86407	0.0130665	merged_common_peaks	125.774	107.893
1	10152773	10156554	1868	0.07505	8.42328	0.0120273	merged_common_peaks	352.335	334.475
1	10347115	10349265	1096	0.01465	8.41817	0.0150713	merged_common_peaks	343.817	340.343
1	10357201	10363193	2956	0.07668	9.1215	0.00798129	merged_common_peaks	571.988	542.38
1	10526244	10526942	349	0.19781	7.0154	0.013281	merged_common_peaks	138.554	120.802
1	10532026	10534805	1404	0.02901	8.46706	0.0144883	merged_common_peaks	357.442	350.326
1	10602871	10605064	979	-0.11913	8.22108	0.00967662	merged_common_peaks	286.326	310.973
1	10696779	10701516	2378	0.00171	9.17921	0.0117108	merged_common_peaks	580.063	579.376
1	10723938	10724898	484	0.02274	7.28594	0.0224238	merged_common_peaks	157.293	154.833
1	10802668	10803142	242	0.10676	6.79892	0.0222704	merged_common_peaks	115.544	107.303
1	10915467	10916300	383	0.07914	7.34124	0.0195287	merged_common_peaks	166.665	157.769
1	10922812	10924759	1209	0.12391	7.80818	0.0125978	merged_common_peaks	233.963	214.707
1	10928188	10931012	1508	0.06826	7.83073	0.0163697	merged_common_peaks	233.109	222.336
1	10964740	10966220	730	0.18123	7.61563	0.00909384	merged_common_peaks	208.839	184.185
1	10981694	10983317	898	-0.29486	7.54644	0.00301918	merged_common_peaks	168.781	207.055
1	11046939	11051441	2362	-0.01105	8.1968	0.0163336	merged_common_peaks	292.294	294.541
1	11064592	11066947	1218	-0.00563	8.36251	0.0154994	merged_common_peaks	328.488	329.772
1	11097042	11100855	1907	-0.02056	8.5038	0.0144391	merged_common_peaks	360.416	365.589
1	11102364	11103905	791	0.02045	8.1144	0.0166993	merged_common_peaks	279.097	275.169
1	11148017	11152955	2471	-0.01623	8.90614	0.0127125	merged_common_peaks	477.059	482.456
1	11301551	11310189	4511	-0.08754	8.93402	0.0080533	merged_common_peaks	474.495	504.178
1	11321888	11323855	1229	-0.03631	7.6301	0.019391	merged_common_peaks	195.625	200.611
1	11365415	11367269	935	-0.06845	7.42966	0.0190917	merged_common_peaks	168.363	176.544
1	11502789	11512843	5009	-0.02749	8.75269	0.0130896	merged_common_peaks	427.252	435.472
1	11517967	11521655	1821	0.06745	8.47171	0.0125008	merged_common_peaks	363.405	346.806
1	11585831	11587196	462	-0.15011	7.07384	0.016893	merged_common_peaks	127.892	141.916
1	11643304	11644448	566	-0.01561	7.69025	0.0194067	merged_common_peaks	205.422	207.656
1	11704042	11705329	571	-0.03391	7.48014	0.0203755	merged_common_peaks	176.458	180.655
1	11752320	11754720	1115	0.01349	8.40258	0.0152255	merged_common_peaks	339.984	336.82
1	11788980	11794158	2605	-0.07125	8.69932	0.0108752	merged_common_peaks	405.538	426.07
1	11834697	11837489	1393	0.03325	8.49554	0.0141994	merged_common_peaks	365.104	356.786
1	11887102	11901776	7415	0.04688	8.40919	0.0137587	merged_common_peaks	345.521	334.474
1	11958083	11961255	1537	0.0644	8.32377	0.0132191	merged_common_peaks	327.641	313.337
1	12013639	12020162	3250	0.06227	8.67587	0.0114417	merged_common_peaks	417.897	400.244
1	12031632	12033142	759	-0.07421	7.5683	0.0179363	merged_common_peaks	184.976	194.74
1	12035754	12038554	1268	0.16361	7.97065	0.0081604	merged_common_peaks	265.479	237.017
1	12076442	12080887	2227	-0.05695	7.68981	0.0177903	merged_common_peaks	202.438	210.589
1	12138918	12143195	2136	0.07654	8.98898	0.00874225	merged_common_peaks	521.763	494.803
1	12172857	12177020	2055	-0.10034	8.71234	0.00834547	merged_common_peaks	405.11	434.289
1	12222657	12223272	281	-0.18756	7.33118	0.0112255	merged_common_peaks	150.895	171.845
1	12252387	12253681	612	-0.03006	7.54623	0.0201799	merged_common_peaks	184.977	188.871
1	12263220	12264361	653	0.10581	7.12217	0.0192246	merged_common_peaks	144.515	134.295
1	12273045	12276318	1712	-0.07991	8.09464	0.0138851	merged_common_peaks	265.89	281.033
1	12286648	12288197	628	-0.04433	7.44652	0.0205909	merged_common_peaks	171.772	177.132
1	12291459	12294705	1643	0.15223	7.70745	0.0109424	merged_common_peaks	220.337	198.272
1	12297602	12300031	1193	-0.02177	7.45302	0.0210085	merged_common_peaks	173.903	176.547
1	12315163	12316991	912	-0.0125	7.76728	0.0190077	merged_common_peaks	216.922	218.809
1	12361722	12363826	1058	-0.09636	8.03425	0.013222	merged_common_peaks	253.54	271.053
1	12376796	12380191	1752	-0.01947	8.50666	0.0145391	merged_common_peaks	361.268	366.176
1	12401555	12412670	5031	-0.07184	8.84636	0.00986417	merged_common_peaks	448.959	471.881
1	12444314	12446187	1093	-0.07522	7.51464	0.0181843	merged_common_peaks	178.16	187.695
1	12466983	12471268	2067	0.14809	7.91936	0.00951567	merged_common_peaks	254.832	229.972
1	12497475	12499245	874	0.0388	7.92243	0.0172156	merged_common_peaks	245.883	239.359
1	12508534	12515220	3305	-0.08531	7.90218	0.0148629	merged_common_peaks	232.248	246.396
1	12555251	12559327	1988	-0.02115	8.31304	0.0156155	merged_common_peaks	315.712	320.374
1	12565516	12574429	4492	0.00965	8.32845	0.0156171	merged_common_peaks	322.527	320.377
1	12575999	12581010	2708	0.12565	8.10733	0.0100808	merged_common_peaks	288.046	264.02
1	12591241	12595646	2379	-0.09435	7.6871	0.0154926	merged_common_peaks	199.456	212.936
1	12626451	12630637	2228	0.07498	8.36642	0.0124692	merged_common_peaks	338.711	321.557
1	12651399	12653158	889	0.13431	7.82125	0.0115244	merged_common_peaks	236.944	215.881
1	12664172	12684903	10440	0.14207	8.3545	0.00714025	merged_common_peaks	343.826	311.581
1	12698897	12701813	1483	0.03326	7.98874	0.0170768	merged_common_peaks	256.955	251.099
1	12711603	12734664	10078	0.00597	8.73597	0.0136315	merged_common_peaks	427.255	425.491
1	12739997	12741720	772	-0.11827	7.93966	0.0119805	merged_common_peaks	235.654	255.786
1	12753410	12761005	3799	-0.14193	7.92782	0.0100137	merged_common_peaks	231.819	255.784
1	12766547	12772077	1931	-0.01441	7.49457	0.0208954	merged_common_peaks	179.441	181.242
1	12774211	12779039	3030	-0.02086	7.18546	0.0231677	merged_common_peaks	144.51	146.615
1	12780724	12785787	1704	0.10703	7.03841	0.0210806	merged_common_peaks	136.421	126.667
1	12787633	12792713	1760	0.18895	7.05921	0.014221	merged_common_peaks	142.388	124.909
1	12794325	12796088	934	0.18582	7.43171	0.0106654	merged_common_peaks	184.135	161.882
1	12801355	12809503	4189	0.01285	7.70856	0.0194084	merged_common_peaks	210.108	208.245
1	12811171	12839582	15739	-0.02412	8.44289	0.014731	merged_common_peaks	345.09	350.908
1	12847411	12849718	1190	-0.00591	8.11652	0.0169113	merged_common_peaks	276.966	278.103
1	12854163	12866227	6032	-0.0008	8.83258	0.0132067	merged_common_peaks	455.776	456.028
1	12886065	12887513	693	-0.0946	7.51394	0.017126	merged_common_peaks	176.882	188.869
1	12899516	12903489	2068	-0.05368	7.49349	0.0196093	merged_common_peaks	176.883	183.588
1	12905291	12908230	1511	0.06881	8.29316	0.0133136	merged_common_peaks	321.253	306.29
1	12926246	12931990	2873	0.00082	8.00255	0.017588	merged_common_peaks	256.526	256.38
1	12941523	12947124	3009	-0.04273	8.91034	0.0116148	merged_common_peaks	474.076	488.327
1	12949912	12953461	1722	-0.05931	8.28866	0.013937	merged_common_peaks	306.343	319.2
1	12995422	13014627	9640	-0.12043	8.66674	0.00687658	merged_common_peaks	389.782	423.716
1	13018361	13024813	3181	0.08072	8.31562	0.0122521	merged_common_peaks	327.643	309.814
1	13028024	13028568	320	0.04525	7.01417	0.0240583	merged_common_peaks	131.307	127.252
1	13043037	13043613	294	0.04477	7.04681	0.0238005	merged_common_peaks	134.289	130.185
1	13055547	13057618	1085	0.12099	7.40969	0.0162183	merged_common_peaks	177.317	163.053
1	13081192	13088022	3291	0.05566	8.0946	0.0152675	merged_common_peaks	278.673	268.127
1	13096732	13102713	3328	0.00262	8.52923	0.0146605	merged_common_peaks	369.784	369.113
1	13107612	13111613	1982	-0.08958	8.18034	0.0125284	merged_common_peaks	281.219	299.234
1	13127014	13128094	529	0.0816	7.845	0.0154661	merged_common_peaks	236.517	223.511
1	13131487	13140034	4273	-0.07215	8.54146	0.0114708	merged_common_peaks	363.393	382.028
1	13148410	13153939	2765	-0.12181	7.19711	0.0182113	merged_common_peaks	140.673	153.067
1	13172908	13192493	9787	-0.02863	8.62402	0.0137646	merged_common_peaks	390.642	398.472
1	13199208	13199894	373	-0.06366	6.92602	0.024289	merged_common_peaks	118.948	124.314
1	13230639	13245240	6188	-0.04787	7.71828	0.0183356	merged_common_peaks	207.123	214.111
1	13247453	13248787	761	0.0181	7.29993	0.0222835	merged_common_peaks	158.57	156.593
1	13259594	13260488	425	0.24756	7.38744	0.00678676	merged_common_peaks	182.433	153.667
1	13263569	13276168	6332	0.09312	8.33543	0.0111554	merged_common_peaks	333.603	312.751
1	13282544	13288787	3111	0.02593	8.03481	0.0169943	merged_common_peaks	264.619	259.906
1	13291411	13303605	6222	-0.0368	8.30521	0.0150808	merged_common_peaks	312.305	320.373
1	13304840	13312570	3456	0.04833	8.05576	0.0160104	merged_common_peaks	270.583	261.668
1	13324813	13339621	7423	0.16306	8.21319	0.0061904	merged_common_peaks	314.022	280.462
1	13347714	13349295	787	-0.05998	7.68829	0.0177903	merged_common_peaks	202.012	210.588
1	13372102	13387180	7567	0.01989	8.63549	0.0139242	merged_common_peaks	400.438	394.955
1	13390092	13402740	6323	-0.01333	7.80128	0.0187956	merged_common_peaks	222.031	224.092
1	13404958	13407447	1318	0.03362	8.22203	0.0156656	merged_common_peaks	302.091	295.133
1	13409316	13415415	3003	-0.05859	8.38897	0.013313	merged_common_peaks	328.483	342.098
1	13418099	13423366	2019	-0.18991	8.30081	0.00393373	merged_common_peaks	295.263	336.804
1	13424854	13437146	6159	-0.14446	7.67784	0.0121014	merged_common_peaks	194.768	215.28
1	13439283	13449243	4998	0.07805	8.98114	0.00874954	merged_common_peaks	519.207	491.864
1	13477737	13479185	895	-0.38332	7.54251	0.000739283	merged_common_peaks	163.24	212.92
1	13480525	13495313	7388	0.09134	8.65397	0.00924014	merged_common_peaks	415.769	390.262
1	13498573	13501903	1776	0.0446	7.87125	0.0174764	merged_common_peaks	237.791	230.552
1	13503742	13523214	9737	-0.05079	9.09321	0.0102292	merged_common_peaks	536.642	555.87
1	13524466	13527044	1295	0.07589	7.60818	0.0177647	merged_common_peaks	200.315	190.05
1	13559804	13565438	2839	0.01022	8.69155	0.0137932	merged_common_peaks	414.912	411.983
1	13572406	13581724	4888	0.16951	8.19819	0.00616051	merged_common_peaks	311.469	276.941
1	13591490	13601722	5104	0.03979	8.97401	0.0114087	merged_common_peaks	509.841	495.972
1	13605023	13637390	16140	-0.0387	8.38649	0.0145138	merged_common_peaks	330.187	339.164
1	13643660	13667902	12039	-0.06176	7.49405	0.019229	merged_common_peaks	176.457	184.175
1	13675323	13682824	3796	0.01884	8.73242	0.0134724	merged_common_peaks	428.111	422.556
1	13689410	13695154	2866	0.0531	8.48394	0.0132399	merged_common_peaks	364.681	351.502
1	13704190	13748421	16309	-0.00742	8.40214	0.015293	merged_common_peaks	337.427	339.167
1	13750898	13759614	4360	0.23084	7.93474	0.0038295	merged_common_peaks	265.057	225.865
1	13762121	13807702	22865	-0.0752	8.90962	0.00929358	merged_common_peaks	468.537	493.607
1	13812829	13813622	418	-0.04809	7.10687	0.0233087	merged_common_peaks	135.564	140.158
1	13815155	13836338	11270	0.01578	8.75672	0.0133662	merged_common_peaks	434.921	430.19
1	13839762	13852314	6221	0.10351	8.3648	0.0100394	merged_common_peaks	341.693	318.036
1	13854311	13855496	782	0.05419	7.31257	0.0211275	merged_common_peaks	161.979	156.008
1	13857735	13859885	827	-0.03485	7.3108	0.0218003	merged_common_peaks	156.864	160.7
1	13861125	13878442	6398	0.14226	7.71522	0.0115211	merged_common_peaks	220.762	200.032
1	13880387	13894954	7291	-0.05376	8.98415	0.0104878	merged_common_peaks	497.058	515.929
1	13902171	13964246	32451	0.13311	7.80883	0.0115256	merged_common_peaks	234.816	214.12
1	13966539	13979732	6588	0.06928	8.49925	0.0118533	merged_common_peaks	370.644	353.266
1	13982055	13984953	1473	-0.13346	7.32838	0.0156867	merged_common_peaks	153.453	168.326
1	13986194	13989850	1130	0.14608	7.56079	0.0120946	merged_common_peaks	198.615	179.489
1	13991217	13998624	3724	-0.09203	7.88153	0.0144757	merged_common_peaks	228.415	243.461
1	14005120	14007260	1071	-0.19782	7.6629	0.00754677	merged_common_peaks	189.229	217.039
1	14010032	14010959	473	0.02595	7.5832	0.0201344	merged_common_peaks	193.498	190.049
1	14014713	14024517	6069	0.02087	8.86555	0.0127192	merged_common_peaks	469.827	463.079
1	14032212	14033423	582	-0.07826	7.3048	0.0202711	merged_common_peaks	153.881	162.459
1	14035680	14037006	720	0.09907	7.64189	0.0156117	merged_common_peaks	206.704	192.986
1	14038628	14146382	53933	-0.00517	8.92739	0.0127535	merged_common_peaks	485.997	487.742
1	14178106	14287702	56219	-0.01156	9.08047	0.0119808	merged_common_peaks	539.205	543.543
1	14297896	14299104	586	0.21318	7.19468	0.0102275	merged_common_peaks	157.725	136.059
1	14300273	14303106	1399	-0.11669	8.10607	0.0109557	merged_common_peaks	264.61	286.902
1	14309846	14511704	100958	0.00378	8.01063	0.0175539	merged_common_peaks	258.231	257.556
1	14538731	14545727	3497	-0.10257	8.62273	0.00864356	merged_common_peaks	380.419	408.45
1	14581696	14604324	11313	-0.04174	8.80091	0.0121426	merged_common_peaks	439.598	452.502
1	14605737	14607853	930	0.02032	7.25154	0.0227127	merged_common_peaks	153.458	151.312
1	14609227	14610639	715	-0.021	8.30516	0.0155408	merged_common_peaks	314.009	318.613
1	14657679	14661045	1694	0.16108	7.33311	0.0127025	merged_common_peaks	170.503	152.49
1	14662218	14663914	876	-0.06124	7.54846	0.0189287	merged_common_peaks	183.272	191.219
1	14665006	14717086	26065	-0.18587	7.94181	0.00678521	merged_common_peaks	230.54	262.24
1	14718426	14745673	13617	0.06197	8.63275	0.011544	merged_common_peaks	405.55	388.498
1	14747201	14750563	1270	0.03275	7.51817	0.0203895	merged_common_peaks	185.406	181.245
1	14804234	14818038	6911	0.13649	7.98188	0.0100422	merged_common_peaks	265.051	241.125
1	14823643	14859670	21520	0.05401	7.96154	0.0164612	merged_common_peaks	253.975	244.643
1	14864247	14915097	25452	0.16827	8.04274	0.00699874	merged_common_peaks	279.533	248.759
1	14917287	15008558	45633	0.03329	8.04499	0.016773	merged_common_peaks	267.174	261.079
1	15009689	15078771	34577	-0.11117	9.66302	0.00291642	merged_common_peaks	780.057	842.542
1	15081795	15086062	2133	-0.41281	10.8614	1.68681e-19	merged_common_peaks	1612.43	2146.6
1	15088966	15603181	266689	0.0619	8.26178	0.0137227	merged_common_peaks	313.589	300.419
1	15610309	15623288	6454	0.04796	8.69181	0.0125228	merged_common_peaks	420.45	406.702
1	15624310	15634472	4463	-0.11113	8.27594	0.0100711	merged_common_peaks	298.249	322.131
1	15636710	15641216	2238	0.01843	8.51634	0.0144815	merged_common_peaks	368.509	363.831
1	15643366	15649854	3272	0.12704	8.0187	0.010523	merged_common_peaks	271.013	248.169
1	15652993	15729854	38266	0.09033	8.41565	0.0110539	merged_common_peaks	352.338	330.954
1	15731022	15879212	74152	-0.04771	8.70112	0.012292	merged_common_peaks	409.371	423.135
1	15884570	15886954	1154	-0.08682	8.12101	0.0130408	merged_common_peaks	270.147	286.903
1	15908877	15921592	6321	-0.00576	8.46888	0.0149668	merged_common_peaks	353.606	355.021
1	15942001	15944773	1378	0.10977	7.50921	0.0159745	merged_common_peaks	189.243	175.378
1	15950056	15959996	4970	0.05994	8.16763	0.0146661	merged_common_peaks	293.578	281.631
1	15961582	15965010	1707	-0.07507	8.37078	0.0124586	merged_common_peaks	322.52	339.747
1	15966286	15971770	2684	0.01182	8.01136	0.0174862	merged_common_peaks	259.083	256.969
1	15986948	16067419	36636	0.02478	7.89402	0.0179719	merged_common_peaks	239.92	235.834
1	16068563	16124942	25951	0.00907	8.69508	0.0137768	merged_common_peaks	415.762	413.157
1	16145682	16148289	1299	0.0144	7.87076	0.0183528	merged_common_peaks	235.235	232.899
1	16165324	16170251	2418	0.014	7.70506	0.0194084	merged_common_peaks	209.682	207.657
1	16171885	16181587	6018	-0.08199	7.81889	0.0155733	merged_common_peaks	219.472	232.306
1	16185897	16187619	811	-0.19754	7.45345	0.00939145	merged_common_peaks	163.674	187.692
1	16188983	16222009	15556	-0.01221	8.26912	0.0159378	merged_common_peaks	307.196	309.807
1	16224006	16225949	833	-0.08909	7.50771	0.0171545	merged_common_peaks	176.456	187.696
1	16237691	16252909	5960	0.10801	8.26783	0.0104634	merged_common_peaks	319.979	296.898
1	16279437	16306669	13985	0.09475	7.92903	0.0138924	merged_common_peaks	251.847	235.838
1	16311139	16325148	6971	0.06415	7.94919	0.0158639	merged_common_peaks	252.697	241.707
1	16329177	16340547	5448	0.10064	8.28679	0.0112148	merged_common_peaks	323.385	301.595
1	16343225	16361125	10111	-0.01212	7.58626	0.0202398	merged_common_peaks	191.367	192.982
1	16364636	16398009	15933	0.08597	8.26534	0.0123566	merged_common_peaks	316.997	298.659
1	16404276	16409698	2425	-0.0685	7.98103	0.0153794	merged_common_peaks	246.728	258.726
1	16414007	16414570	325	0.06462	6.92758	0.024289	merged_common_peaks	124.49	119.037
1	16418767	16421147	1211	0.05798	7.31446	0.0211275	merged_common_peaks	162.405	156.007
1	16430908	16434135	1646	0.12222	8.43926	0.00826608	merged_common_peaks	362.132	332.717
1	16449840	16451200	679	0.01389	7.58605	0.0202398	merged_common_peaks	193.072	191.222
1	16452713	16453862	601	-0.0725	7.60353	0.0182202	merged_common_peaks	189.661	199.436
1	16455313	16460117	2401	-0.04598	8.28199	0.0147565	merged_common_peaks	306.342	316.263
1	16462728	16463460	364	0.20513	7.1592	0.0117343	merged_common_peaks	153.465	133.125
1	16474839	16477742	1280	0.07915	8.08727	0.0139001	merged_common_peaks	279.527	264.605
1	16488940	16492777	1694	0.1152	8.77057	0.0066995	merged_common_peaks	454.511	419.629
1	16494499	16534644	21776	-0.18793	10.1374	6.99089e-05	merged_common_peaks	1055.31	1202.14
1	16538516	16544277	2690	0.01938	7.75982	0.0189632	merged_common_peaks	218.2	215.289
1	16551166	16558885	3858	0.05336	8.1583	0.0150129	merged_common_peaks	291.021	280.454
1	16568903	16575359	3182	-0.03015	8.35024	0.015032	merged_common_peaks	322.95	329.77
1	16581566	16589553	3993	-0.04463	8.82728	0.0118829	merged_common_peaks	447.258	461.311
1	16594213	16612580	2728	0.03466	7.35608	0.0214823	merged_common_peaks	165.813	161.877
1	16625620	16637451	5893	-0.00501	8.90824	0.0128591	merged_common_peaks	479.616	481.284
1	16659829	16664213	2211	-0.05307	8.56864	0.0127183	merged_common_peaks	372.76	386.728
1	16666344	16667888	474	-0.12733	7.19987	0.0174426	merged_common_peaks	140.673	153.653
1	16671663	16686228	7290	-0.0478	8.78848	0.0118078	merged_common_peaks	434.912	449.563
1	16691420	16699317	3917	0.06791	8.73067	0.0108143	merged_common_peaks	434.926	414.927
1	16711235	16711994	271	-0.10265	7.17878	0.0197107	merged_common_peaks	139.823	150.134
1	16716445	16718327	989	0.04117	7.85477	0.0175773	merged_common_peaks	234.811	228.205
1	16724221	16738483	7134	-0.01451	8.69351	0.0137269	merged_common_peaks	411.93	416.094
1	16740256	16752048	6335	0.04455	8.39785	0.0140355	merged_common_peaks	342.539	332.123
1	16790670	16791753	537	0.06216	7.41109	0.0200956	merged_common_peaks	173.907	166.573
1	16815259	16816435	737	-0.10876	7.20364	0.0189167	merged_common_peaks	141.952	153.067
1	16853438	16857957	2232	-0.04293	8.63588	0.0129146	merged_common_peaks	391.92	403.757
1	16879490	16881368	820	-0.10206	7.15634	0.0198003	merged_common_peaks	137.693	147.786
1	16881562	16884171	1561	-0.10557	7.63295	0.0150818	merged_common_peaks	191.363	205.891
1	16885813	16886829	443	-0.02418	7.52659	0.0205032	merged_common_peaks	182.848	185.938
1	16942846	16962347	9730	-0.05986	8.12562	0.0151387	merged_common_peaks	273.556	285.145
1	16985301	16986092	411	-0.06072	7.20538	0.0218059	merged_common_peaks	144.509	150.721
1	17004283	17007263	1248	-0.04242	7.57548	0.0194618	merged_common_peaks	187.958	193.567
1	17016698	17020573	1883	-0.02394	7.70633	0.0191324	merged_common_peaks	207.125	210.591
1	17023210	17030838	3790	-0.14631	9.03163	0.00306715	merged_common_peaks	497.473	550.571
1	17034914	17050069	7587	0.053	8.39184	0.0138229	merged_common_peaks	342.116	329.775
1	17070153	17074663	2257	0.11263	8.39576	0.00930886	merged_common_peaks	350.21	323.909
1	17137723	17141786	1109	0.08776	7.93983	0.0143162	merged_common_peaks	253.126	238.187
1	17194345	17197523	1582	-0.03435	7.75247	0.0186575	merged_common_peaks	213.086	218.221
1	17203602	17207920	1590	0.05907	8.04812	0.0154667	merged_common_peaks	270.157	259.319
1	17213924	17217347	1630	0.01266	8.06675	0.0171596	merged_common_peaks	269.302	266.949
1	17254820	17265134	5160	0.10776	8.84161	0.00701716	merged_common_peaks	476.222	441.947
1	17312538	17317755	2614	0.08485	8.14045	0.0129958	merged_common_peaks	290.597	273.999
1	17324004	17324746	410	-0.06056	7.22222	0.0217416	merged_common_peaks	146.214	152.483
1	17341631	17342465	381	-0.22482	7.2573	0.00963127	merged_common_peaks	141.523	165.388
1	17361072	17365593	2240	-0.07446	8.59897	0.0110672	merged_common_peaks	377.868	397.883
1	17405784	17415079	5591	0.00057	7.62729	0.020035	merged_common_peaks	197.756	197.678
1	17431064	17431650	312	0.09273	7.10296	0.0207544	merged_common_peaks	141.958	133.121
1	17489216	17491125	1049	0.09118	8.04114	0.0132106	merged_common_peaks	271.862	255.212
1	17502929	17503507	331	-0.106	7.26992	0.0186554	merged_common_peaks	148.768	160.11
1	17515081	17517857	1150	-0.08875	7.39533	0.0181561	merged_common_peaks	163.252	173.61
1	17520746	17525033	2145	-0.0391	8.61026	0.0133793	merged_common_peaks	385.533	396.124
1	17528704	17536313	3796	-0.00533	8.4547	0.0150517	merged_common_peaks	350.2	351.496
1	17543909	17544830	469	-0.17176	7.27357	0.013444	merged_common_peaks	145.784	164.216
1	17546588	17547964	680	-0.01048	7.4296	0.0214318	merged_common_peaks	171.773	173.025
1	17570957	17571852	460	0.00836	7.47288	0.0211291	merged_common_peaks	178.164	177.134
1	17573646	17576144	1343	-0.11275	7.89188	0.01252	merged_common_peaks	228.414	246.981
1	17589910	17591164	629	-0.22418	7.56121	0.00676482	merged_common_peaks	174.747	204.124
1	17608071	17611688	1817	-8e-05	8.52559	0.0146803	merged_common_peaks	368.507	368.528
1	17620938	17621896	471	-0.13598	7.73234	0.0120909	merged_common_peaks	202.861	222.912
1	17624915	17627438	1256	0.07281	8.35476	0.0125011	merged_common_peaks	335.732	319.208
1	17656718	17660349	1802	0.09359	8.26347	0.0116249	merged_common_peaks	317.423	297.485
1	17667941	17682098	7123	-0.02052	8.34733	0.015333	merged_common_peaks	323.376	328.009
1	17689633	17690640	518	-0.05833	7.90186	0.0164298	merged_common_peaks	234.378	244.049
1	17713643	17715358	692	0.07988	7.53707	0.0180769	merged_common_peaks	190.945	180.66
1	17760086	17761432	596	-0.02639	7.73692	0.0189589	merged_common_peaks	211.384	215.287
1	17812356	17813718	653	0.07562	7.97235	0.0150345	merged_common_peaks	257.809	244.644
1	17842482	17845216	1351	0.0646	8.58528	0.0119206	merged_common_peaks	392.781	375.581
1	17936270	17937845	946	-0.29454	7.44056	0.00369744	merged_common_peaks	156.855	192.382
1	18002147	18007351	2622	0.018	8.86959	0.0127883	merged_common_peaks	470.676	464.84
1	18013250	18018623	2704	-0.03508	9.2948	0.0101649	merged_common_peaks	620.488	635.761
1	18020065	18020731	321	-0.13172	7.52203	0.0146891	merged_common_peaks	175.603	192.39
1	18053513	18055433	731	0.03528	7.53338	0.0200141	merged_common_peaks	187.536	183.005
1	18088630	18089466	445	0.28067	7.16485	0.00603721	merged_common_peaks	158.154	130.194
1	18094708	18095833	366	0.15155	7.26013	0.0142276	merged_common_peaks	161.558	145.448
1	18154497	18165409	5474	0.04399	8.64325	0.0128881	merged_common_peaks	405.974	393.782
1	18302513	18304386	901	0.02321	7.94266	0.0176872	merged_common_peaks	248.012	244.054
1	18338417	18339930	799	-0.10349	7.92705	0.0134369	merged_common_peaks	234.803	252.265
1	18386423	18387378	471	-0.07384	7.46484	0.0189245	merged_common_peaks	172.197	181.24
1	18489733	18491526	572	-0.18334	7.16079	0.0133982	merged_common_peaks	134.282	152.478
1	18599712	18600411	379	-0.02678	7.38678	0.0214905	merged_common_peaks	165.81	168.917
1	18632241	18633370	576	0.13008	7.32315	0.0156867	merged_common_peaks	167.52	153.077
1	18640887	18642099	615	-0.02038	7.56447	0.0202377	merged_common_peaks	187.96	190.634
1	18643805	18644718	321	0.03053	7.28983	0.0222109	merged_common_peaks	158.144	154.833
1	18827558	18829116	549	-0.11386	7.05573	0.0202635	merged_common_peaks	127.894	138.396
1	18846355	18855911	4511	-0.02141	8.29161	0.015612	merged_common_peaks	311.029	315.679
1	18894289	18895422	610	-0.06016	7.54456	0.0189287	merged_common_peaks	182.845	190.631
1	18962142	18972014	4954	-0.09584	8.87332	0.0078059	merged_common_peaks	453.639	484.798
1	19146681	19147629	471	-0.0285	7.11062	0.023564	merged_common_peaks	136.842	139.572
1	19317714	19319688	1183	-0.06654	7.56778	0.0184083	merged_common_peaks	185.402	194.153
1	19336323	19345557	4623	0.03132	8.90156	0.0122427	merged_common_peaks	483.449	473.067
1	19373697	19380814	3805	0.07331	8.61645	0.0110327	merged_common_peaks	402.573	382.627
1	19542005	19543403	506	-0.20162	7.23262	0.0110642	merged_common_peaks	140.245	161.281
1	19595674	19599754	2070	-0.02116	8.41264	0.0150043	merged_common_peaks	338.277	343.275
1	19675553	19680311	2335	0.07055	8.68635	0.0109024	merged_common_peaks	422.154	402.006
1	19706318	19706669	179	-0.15214	6.812	0.020325	merged_common_peaks	106.59	118.445
1	19725365	19729492	1965	-0.01204	8.20777	0.0162791	merged_common_peaks	294.424	296.891
1	19731906	19736142	2117	-0.03161	8.652	0.0133676	merged_common_peaks	397.882	406.695
1	19808168	19809961	1019	0.11494	7.85408	0.0125572	merged_common_peaks	240.776	222.338
1	19944066	19944584	288	0.05549	6.88701	0.0245622	merged_common_peaks	120.656	116.103
1	20085015	20090745	2733	-0.03123	8.70335	0.0131634	merged_common_peaks	412.353	421.376
1	20311948	20320582	4310	0.03849	8.94053	0.0116742	merged_common_peaks	497.922	484.813
1	20329784	20331506	870	-0.05081	7.72863	0.0179585	merged_common_peaks	208.402	215.872
1	20333371	20334810	775	-0.102	7.55874	0.0164191	merged_common_peaks	181.993	195.326
1	20475492	20477895	1201	0.04933	8.07555	0.0159346	merged_common_peaks	274.415	265.19
1	20683442	20685944	1278	0.08472	8.36337	0.0118172	merged_common_peaks	339.138	319.796
1	20709482	20711069	822	0.01147	8.14938	0.0166732	merged_common_peaks	285.059	282.801
1	20824394	20826319	1028	0.05516	7.76983	0.0177466	merged_common_peaks	222.461	214.116
1	20979703	20982838	1555	0.16727	9.13203	0.00171456	merged_common_peaks	594.554	529.466
1	20988046	20989845	1111	-0.29792	7.31964	0.00408923	merged_common_peaks	144.075	177.122
1	21124723	21126174	719	0.05669	7.88828	0.0164844	merged_common_peaks	241.625	232.314
1	21210637	21211343	397	0.02769	6.88037	0.0257234	merged_common_peaks	118.95	116.689
1	21244259	21250628	2849	0.02143	8.61465	0.0139205	merged_common_peaks	394.906	389.083
1	21345832	21352382	3179	0.11	8.79596	0.00698705	merged_common_peaks	461.747	427.85
1	21390197	21392849	1660	0.09362	7.42683	0.0180192	merged_common_peaks	177.742	166.574
1	21450211	21457578	3692	-0.11614	8.62628	0.0077292	merged_common_peaks	379.567	411.386
1	21470586	21471964	720	0.18494	7.73234	0.00770847	merged_common_peaks	226.727	199.448
1	21481143	21485099	1823	-0.22051	7.31469	0.00839707	merged_common_peaks	147.486	171.843
1	21525043	21529645	2307	-0.05947	9.04868	0.00975194	merged_common_peaks	518.768	540.599
1	21691428	21693694	1172	-0.24916	7.5236	0.00520502	merged_common_peaks	168.782	200.6
1	21729129	21731280	1274	-0.15546	7.42866	0.0127354	merged_common_peaks	163.249	181.823
1	21747259	21754403	3509	-0.04062	8.84572	0.0119911	merged_common_peaks	453.642	466.596
1	21772088	21773376	638	0.12782	7.43374	0.0148184	merged_common_peaks	180.725	165.402
1	21774931	21777094	1196	0.02275	7.78878	0.0186256	merged_common_peaks	222.885	219.398
1	21797522	21800971	1695	0.11429	7.96725	0.0124332	merged_common_peaks	260.366	240.535
1	21808363	21809652	578	0.1209	7.33505	0.0170875	merged_common_peaks	168.371	154.836
1	21811775	21814305	1139	-0.06942	7.79572	0.0165032	merged_common_peaks	216.919	227.612
1	21833939	21836945	1480	0.19054	7.92206	0.00631613	merged_common_peaks	259.094	227.038
1	21844523	21845815	789	0.02835	7.44903	0.021067	merged_common_peaks	176.461	173.027
1	21848059	21852680	2870	-0.08432	7.16521	0.0204413	merged_common_peaks	139.396	147.786
1	21872717	21873872	610	-0.0004	7.52475	0.0207822	merged_common_peaks	184.126	184.177
1	21991072	21992802	984	0.2202	8.03426	0.00380458	merged_common_peaks	282.942	242.89
1	22059403	22062761	1614	0.12687	8.54475	0.00704468	merged_common_peaks	390.231	357.38
1	22082781	22085212	1591	-0.02122	7.35404	0.0217443	merged_common_peaks	162.403	164.809
1	22100752	22106204	2730	-0.00776	8.63234	0.0141179	merged_common_peaks	395.754	397.888
1	22163205	22167669	1645	0.16448	8.29609	0.00568631	merged_common_peaks	332.758	296.903
1	22231231	22232727	816	-0.02037	7.72808	0.0191369	merged_common_peaks	210.532	213.526
1	22357189	22358542	535	-0.10007	7.52014	0.0165401	merged_common_peaks	177.307	190.042
1	22450698	22451342	312	-0.03438	6.90621	0.0255122	merged_common_peaks	118.523	121.381
1	22694012	22699276	2654	0.01079	8.95437	0.0125616	merged_common_peaks	497.918	494.208
1	22795746	22796526	389	0.05982	7.0347	0.0229942	merged_common_peaks	133.863	128.426
1	22872299	22872973	304	0.21633	6.97475	0.012303	merged_common_peaks	135.572	116.694
1	22992411	22993308	470	0.22063	7.04769	0.0115463	merged_common_peaks	142.815	122.563
1	23118229	23123222	2508	-0.0815	8.85937	0.00909621	merged_common_peaks	451.512	477.753
1	23240291	23242938	1322	-0.03908	8.68325	0.0129179	merged_common_peaks	405.543	416.678
1	23280544	23281563	524	0.11942	7.48477	0.0153923	merged_common_peaks	186.687	171.856
1	23295812	23297164	690	-0.05137	7.89839	0.0167735	merged_common_peaks	234.38	242.876
1	23433839	23435947	1171	-0.20344	7.99001	0.0049628	merged_common_peaks	236.926	272.806
1	23566573	23569994	1604	-0.03755	8.61743	0.0133496	merged_common_peaks	387.662	397.884
1	23925587	23932317	3392	-0.02492	8.52461	0.0143455	merged_common_peaks	365.101	371.462
1	23965518	23966186	342	0.0399	7.35346	0.0212204	merged_common_peaks	165.813	161.29
1	24272027	24277406	2706	-0.03796	8.18908	0.0156229	merged_common_peaks	288.035	295.714
1	24350982	24353034	1341	0.07311	7.52428	0.0181483	merged_common_peaks	188.816	179.486
1	24455826	24458321	1246	-0.12605	8.26056	0.00928737	merged_common_peaks	293.565	320.368
1	24605482	24606391	377	0.13444	7.45738	0.0147842	merged_common_peaks	184.132	167.749
1	24838269	24838799	265	-0.10411	6.89896	0.0217747	merged_common_peaks	115.113	123.727
1	24908074	24908644	283	0.09009	6.98237	0.0227523	merged_common_peaks	130.456	122.558
1	24917793	24918486	321	-0.04658	7.11966	0.0232297	merged_common_peaks	136.842	141.333
1	25095893	25096827	423	0.25782	7.40902	0.00528697	merged_common_peaks	185.842	155.429
1	25159125	25163401	2134	0.00728	8.8931	0.0128722	merged_common_peaks	476.635	474.236
1	25449602	25450081	254	-0.27382	7.3076	0.00544264	merged_common_peaks	144.076	174.189
1	25639791	25641847	1025	0.11833	8.61666	0.00742067	merged_common_peaks	408.963	376.758
1	26196431	26197251	393	0.08936	7.22901	0.0194909	merged_common_peaks	154.739	145.445
1	26366791	26371637	2434	0.05858	9.09357	0.0094731	merged_common_peaks	557.512	535.328
1	26880625	26883568	1414	0.18962	7.56357	0.00899284	merged_common_peaks	202.024	177.142
1	27066905	27068920	972	-0.1512	8.02235	0.00868741	merged_common_peaks	246.723	273.984
1	27515298	27516470	596	-0.01244	7.5992	0.0201364	merged_common_peaks	193.07	194.742
1	27635518	27636685	611	0.1311	7.45571	0.0147842	merged_common_peaks	183.707	167.749
1	28527121	28527552	190	0.07942	6.76938	0.024859	merged_common_peaks	112.135	106.129
1	28702998	28703707	315	0.12738	6.97313	0.0197853	merged_common_peaks	131.309	120.212
1	28805721	28809284	2384	-0.12825	7.30561	0.0164596	merged_common_peaks	151.323	165.391
1	28816789	28819663	817	-0.17456	7.28756	0.0126762	merged_common_peaks	147.062	165.977
1	29319499	29320011	234	0.12535	6.73542	0.0225941	merged_common_peaks	111.283	102.023
1	29377126	29380626	1753	-0.04477	8.87063	0.0117417	merged_common_peaks	460.879	475.406
1	29474673	29480221	2783	0.03667	8.75332	0.0126581	merged_common_peaks	437.05	426.081
1	30253402	30254765	659	0.1541	7.40006	0.0134429	merged_common_peaks	178.17	160.12
Mt	22	81361	78671	0.01934	7.18229	0.0232462	merged_common_peaks	146.216	144.269
Mt	82685	104935	11860	-0.0272	7.41633	0.0213059	merged_common_peaks	169.217	172.438
Mt	107776	109927	1068	0.11948	7.51407	0.0147013	merged_common_peaks	190.522	175.379
Mt	111213	120243	4506	-0.10888	8.78036	0.00697503	merged_common_peaks	423.412	456.604
Mt	122153	141963	8474	-0.0996	7.59421	0.0162995	merged_common_peaks	186.678	200.021
Mt	143281	366924	116742	0.07896	9.01228	0.00826258	merged_common_peaks	530.703	502.437
3	525501	525976	268	-0.18972	6.99931	0.0141941	merged_common_peaks	119.797	136.634
3	1170356	1171040	355	-0.0168	7.05451	0.0242554	merged_common_peaks	132.157	133.705
3	1555773	1560576	2368	0.19684	8.71757	0.00187264	merged_common_peaks	450.689	393.208
3	1963270	1969861	3833	0.27202	8.67318	0.000340626	merged_common_peaks	448.57	371.488
3	2258833	2260970	1083	0.04866	8.92803	0.0112073	merged_common_peaks	495.369	478.94
3	2360961	2362272	652	0.06477	7.84036	0.0167081	merged_common_peaks	234.386	224.096
3	2628690	2629295	303	-0.11775	7.07202	0.0194218	merged_common_peaks	129.172	140.157
3	2808492	2818847	5172	0.02412	8.93159	0.0123552	merged_common_peaks	492.387	484.224
3	2921678	2923208	782	0.05413	8.21787	0.01477	merged_common_peaks	303.37	292.199
3	3423624	3424642	506	0.00949	7.90422	0.0181997	merged_common_peaks	240.345	238.77
3	3807050	3813574	3128	0.05864	9.0305	0.00978705	merged_common_peaks	533.676	512.419
3	3814882	3817828	1462	-0.207	7.20877	0.0110294	merged_common_peaks	137.689	158.932
3	4277121	4282855	2345	0.06981	8.09851	0.0145947	merged_common_peaks	280.803	267.539
3	4284442	4288168	1841	0.06613	7.73927	0.0171519	merged_common_peaks	218.628	208.833
3	4454132	4456089	1020	0.04213	8.1973	0.0153636	merged_common_peaks	297.834	289.262
3	4727053	4729736	886	-0.07005	7.32446	0.0201696	merged_common_peaks	156.437	164.22
3	4927718	4932262	2242	-0.00882	8.66964	0.0139444	merged_common_peaks	405.97	408.46
3	5152343	5156483	2068	-0.06418	8.33064	0.0134992	merged_common_peaks	314.856	329.179
3	5278065	5286723	4338	0.08446	8.83377	0.008858	merged_common_peaks	469.832	443.116
3	5622773	5623732	356	0.32217	7.08461	0.00416103	merged_common_peaks	151.765	121.392
3	5650903	5652429	820	0.01885	7.7713	0.0188781	merged_common_peaks	219.903	217.049
3	5728143	5729427	626	0.22518	7.80664	0.00481754	merged_common_peaks	242.062	207.081
3	5839570	5840118	277	-0.06352	6.61582	0.0273269	merged_common_peaks	95.94	100.258
3	5867374	5868083	261	0.12849	7.26019	0.0172903	merged_common_peaks	160.278	146.621
3	5929546	5931140	808	-0.00924	8.46714	0.0149457	merged_common_peaks	352.754	355.021
3	6293926	6295158	617	-0.0914	7.84306	0.0145725	merged_common_peaks	222.453	237.003
3	6486520	6487152	310	-0.10565	7.21072	0.0188789	merged_common_peaks	142.804	153.654
3	6990381	6991987	814	-0.08939	7.78573	0.0152007	merged_common_peaks	213.936	227.611
3	7233985	7237118	1564	0.01711	8.52033	0.0145609	merged_common_peaks	369.36	365.006
3	7342510	7344763	1152	0.0176	8.32448	0.0155443	merged_common_peaks	322.528	318.617
3	7499500	7500496	559	-0.27166	7.10545	0.00706887	merged_common_peaks	125.333	151.301
3	7713742	7714891	550	0.52693	7.33288	8.97886e-05	merged_common_peaks	193.521	134.309
3	7765862	7766836	374	-0.12067	7.27312	0.0172649	merged_common_peaks	148.342	161.284
3	7803829	7807211	1685	-0.09346	9.28282	0.00594838	merged_common_peaks	603.032	643.39
3	8002013	8003555	812	-0.03214	7.97279	0.0171712	merged_common_peaks	248.434	254.031
3	8091692	8096466	2937	0.02572	7.92646	0.0177924	merged_common_peaks	245.456	241.119
3	8101108	8102671	774	0.05005	8.17466	0.0152143	merged_common_peaks	294.003	283.978
3	8130249	8133063	1359	0.05095	8.33049	0.0140545	merged_common_peaks	327.639	316.27
3	8209692	8211647	849	-0.14127	7.92484	0.01001	merged_common_peaks	231.394	255.198
3	8373984	8374676	363	-0.00706	7.20387	0.0231685	merged_common_peaks	147.068	147.79
3	8524828	8528096	1927	-0.20309	7.63269	0.00747602	merged_common_peaks	184.97	212.93
3	8537270	8543596	3221	0.13502	8.59777	0.0062161	merged_common_peaks	405.984	369.712
3	8789566	8790326	428	-0.16838	7.38922	0.0120095	merged_common_peaks	158.137	177.714
3	8842926	8858788	7804	0.05847	8.63753	0.0120383	merged_common_peaks	406.402	390.261
3	8937278	8938401	534	-0.05752	7.60251	0.0189833	merged_common_peaks	190.514	198.263
3	8956308	8957182	434	-0.10447	7.37275	0.0176235	merged_common_peaks	159.843	171.847
3	8976895	8978099	557	0.25994	7.70027	0.0034728	merged_common_peaks	227.582	190.059
3	9011533	9017209	2831	0.06027	8.77898	0.0109573	merged_common_peaks	448.547	430.194
3	9185109	9186542	733	-0.35524	7.63021	0.000985027	merged_common_peaks	175.167	224.074
3	9226772	9232672	2956	-0.00638	8.65627	0.0140304	merged_common_peaks	402.566	404.35
3	9236857	9243054	2595	0.08983	8.58202	0.00989816	merged_common_peaks	395.336	371.471
3	9378673	9381376	1393	0.14639	8.25822	0.00736192	merged_common_peaks	322.111	291.03
3	9387953	9393867	3000	0.17604	8.65673	0.0031823	merged_common_peaks	428.975	379.698
3	9435249	9437662	1201	-0.30919	7.91835	0.00112044	merged_common_peaks	217.332	269.277
3	9443733	9446318	1378	-0.18651	7.83426	0.0074424	merged_common_peaks	213.931	243.456
3	9471347	9471947	251	0.21753	6.48815	0.0172701	merged_common_peaks	96.7986	83.2504
3	9558359	9559032	329	0.31701	7.02513	0.00553103	merged_common_peaks	145.375	116.697
3	9608239	9610419	1081	0.0906	8.38735	0.0107412	merged_common_peaks	345.526	324.494
3	9612362	9625468	6556	0.07913	8.68642	0.0103611	merged_common_peaks	423.432	400.832
3	9692277	9697883	2798	0.03403	9.20993	0.0106715	merged_common_peaks	599.221	585.252
3	9723913	9736133	6108	-0.0009	8.80817	0.013324	merged_common_peaks	448.113	448.393
3	9783871	9788236	2174	0.11425	9.12932	0.00483054	merged_common_peaks	582.634	538.273
3	9808355	9808954	278	0.17832	6.79474	0.0172292	merged_common_peaks	118.103	104.371
3	9861820	9863491	884	0.00202	7.84258	0.0185907	merged_common_peaks	229.697	229.376
3	9899278	9901226	1069	-0.09628	7.7484	0.0153164	merged_common_peaks	207.974	222.327
3	9974894	9976150	714	0.13302	7.63677	0.0133139	merged_common_peaks	208.41	190.053
3	10004698	10008537	1929	-0.05015	8.13641	0.0156414	merged_common_peaks	276.538	286.32
3	10106006	10111746	2812	-0.02856	8.85719	0.01254	merged_common_peaks	459.178	468.359
3	10156327	10159125	1267	-0.22981	7.34413	0.00784498	merged_common_peaks	150.042	175.952
3	10166326	10168616	1278	-0.01841	7.77588	0.018836	merged_common_peaks	217.772	220.569
3	10222314	10225406	1559	-0.04931	8.30949	0.0143892	merged_common_peaks	311.877	322.721
3	10262556	10263958	715	0.0478	7.6764	0.0185708	merged_common_peaks	207.98	201.202
3	10272609	10276539	2023	-0.38027	7.25919	0.00149495	merged_common_peaks	134.276	174.771
3	10293271	10294560	585	0.09984	7.49455	0.0166134	merged_common_peaks	186.686	174.204
3	10300654	10302110	758	-0.10143	7.65949	0.0155719	merged_common_peaks	195.195	209.413
3	10339812	10345599	2915	0.00672	8.94028	0.0127017	merged_common_peaks	492.384	490.096
3	10403095	10406689	1711	0.0489	7.80572	0.0175418	merged_common_peaks	227.571	219.986
3	10441007	10441682	343	0.1852	7.04371	0.0142166	merged_common_peaks	140.684	123.735
3	10461050	10464773	1847	0.09424	8.48511	0.0103035	merged_common_peaks	370.218	346.807
3	10477018	10485315	3846	-0.08077	8.99022	0.00850823	merged_common_peaks	494.503	522.977
3	10530949	10532127	555	0.06567	7.86331	0.0165952	merged_common_peaks	238.219	227.619
3	10559109	10562294	1602	-0.12415	8.09345	0.0105205	merged_common_peaks	261.628	285.14
3	10564635	10565135	287	-0.07577	6.73882	0.0250514	merged_common_peaks	104.036	109.646
3	10630408	10631973	673	-0.2423	7.24855	0.00821091	merged_common_peaks	139.817	165.387
3	10635882	10638552	1206	-0.10164	7.90769	0.0134706	merged_common_peaks	231.821	248.743
3	10641025	10641980	486	0.03531	7.36683	0.0214204	merged_common_peaks	167.09	163.05
3	10643841	10646030	1097	0.05229	7.95025	0.0165168	merged_common_peaks	251.845	242.881
3	10700895	10703563	1382	-0.10009	7.7503	0.0148013	merged_common_peaks	207.973	222.914
3	10751273	10752272	498	0.07702	7.21115	0.0208017	merged_common_peaks	152.183	144.271
3	10810339	10815355	2275	-0.05589	7.69836	0.0181039	merged_common_peaks	203.716	211.763
3	10816933	10818728	873	0.11078	7.80948	0.0136476	merged_common_peaks	233.11	215.881
3	10864530	10865717	574	-0.04672	7.45485	0.0205364	merged_common_peaks	172.624	178.306
3	10884344	10891923	3769	-0.11832	8.83917	0.00624728	merged_common_peaks	439.589	477.16
3	10917695	10923002	2653	0.02294	8.87752	0.0126679	merged_common_peaks	474.081	466.602
3	10927649	10933264	2805	0.06508	8.19406	0.01394	merged_common_peaks	299.539	286.327
3	10946391	10946936	283	-0.05366	6.8684	0.0251798	merged_common_peaks	114.688	119.034
3	10953010	10955873	1088	-0.0616	7.38927	0.0202486	merged_common_peaks	164.104	171.263
3	10970185	10975981	2884	0.04142	9.04485	0.0110303	merged_common_peaks	535.803	520.639
3	10978212	10980003	964	-0.01874	7.74467	0.0190495	merged_common_peaks	213.087	215.873
3	11016021	11022637	2831	-0.04069	8.60946	0.0132082	merged_common_peaks	385.107	396.123
3	11024197	11024919	316	0.08092	7.0649	0.0216156	merged_common_peaks	137.698	130.187
3	11045973	11047774	832	-0.17915	7.19038	0.0134145	merged_common_peaks	137.264	155.412
3	11054401	11062967	4370	-0.06973	9.23279	0.0081095	merged_common_peaks	587.288	616.371
3	11064364	11071424	3564	0.01798	8.98008	0.0123285	merged_common_peaks	508.136	501.842
3	11098643	11099558	438	-0.04535	7.31604	0.0214639	merged_common_peaks	156.863	161.873
3	11115425	11120651	2620	-0.06742	8.80111	0.0104289	merged_common_peaks	435.763	456.61
3	11142154	11147821	2827	0.00469	8.86839	0.0130364	merged_common_peaks	468.12	466.601
3	11158016	11158785	369	0.12845	7.27167	0.0165189	merged_common_peaks	161.556	147.794
3	11170577	11183361	6248	-0.03235	7.91486	0.0176805	merged_common_peaks	238.639	244.05
3	11184767	11187834	1676	-0.00726	7.88158	0.0183531	merged_common_peaks	235.234	236.42
3	11196604	11198142	729	0.00756	7.46289	0.0211886	merged_common_peaks	176.885	175.961
3	11205239	11206449	556	0.10364	7.53482	0.0164915	merged_common_peaks	192.223	178.899
3	11223494	11233337	6199	0.01073	7.66206	0.019787	merged_common_peaks	203.294	201.788
3	11321525	11327443	2978	-0.04739	8.36455	0.0141739	merged_common_peaks	324.226	335.053
3	11328620	11344726	8015	0.10704	8.61326	0.00833495	merged_common_peaks	406.407	377.345
3	11348529	11357931	4670	-0.06659	8.49231	0.0121581	merged_common_peaks	351.898	368.522
3	11363986	11364737	375	-0.13963	7.53991	0.0133861	merged_common_peaks	177.306	195.324
3	11368724	11372540	1921	-0.11995	8.00673	0.0114593	merged_common_peaks	246.724	268.114
3	11373971	11374607	272	0.05752	7.12919	0.022342	merged_common_peaks	142.81	137.228
3	11376949	11380457	1760	0.11539	7.95009	0.0124539	merged_common_peaks	257.385	237.601
3	11387836	11394305	3270	-0.05567	8.91939	0.0106369	merged_common_peaks	474.925	493.609
3	11403137	11439081	33330	-0.02147	7.2194	0.0229368	merged_common_peaks	147.919	150.137
3	11441350	11444908	1817	-0.06771	7.39606	0.0201972	merged_common_peaks	164.53	172.436
3	11450082	11462856	5544	-0.05705	7.3258	0.0206192	merged_common_peaks	157.289	163.634
3	11470486	11472164	948	0.16941	7.69886	0.00979474	merged_common_peaks	220.337	195.925
3	11473921	11475573	801	-0.14296	7.62244	0.0127147	merged_common_peaks	187.528	207.062
3	11476962	11481445	2748	0.1282	8.24036	0.0088827	merged_common_peaks	316.149	289.267
3	11483747	11499072	8308	-0.11787	9.04433	0.00511883	merged_common_peaks	506.843	549.991
3	11501735	11509223	3721	-0.05325	8.30752	0.01414	merged_common_peaks	311.027	322.721
3	11511913	11523959	6037	-0.09029	8.83352	0.00833141	merged_common_peaks	442.145	470.7
3	11541441	11588298	22898	-0.10369	8.48975	0.00929939	merged_common_peaks	346.787	372.629
3	11593340	11601007	3834	0.07679	8.5054	0.0115426	merged_common_peaks	373.197	353.853
3	11606932	11614526	3786	-0.03246	7.84367	0.018112	merged_common_peaks	227.14	232.309
3	11617567	11624077	3187	-0.1523	7.58049	0.0120991	merged_common_peaks	181.565	201.78
3	11627437	11641254	6903	0.08284	8.79617	0.00941512	merged_common_peaks	457.488	431.959
3	11643042	11645415	1361	0.03625	7.69979	0.0187221	merged_common_peaks	210.535	205.311
3	11657910	11671221	7816	-0.01438	8.09389	0.0169103	merged_common_peaks	271.856	274.579
3	11674664	11693905	9786	-0.00069	8.44005	0.0151382	merged_common_peaks	347.22	347.386
3	11697418	11715416	8973	0.09799	8.17761	0.0117349	merged_common_peaks	299.54	279.87
3	11723349	11723988	291	-0.16129	7.1267	0.0151011	merged_common_peaks	132.152	147.784
3	11733181	11737134	1787	-0.07993	7.78673	0.0161198	merged_common_peaks	214.787	227.023
3	11766432	11784281	9041	0.02625	7.91615	0.0176805	merged_common_peaks	243.753	239.358
3	11793622	11798422	2396	0.06213	8.79168	0.010928	merged_common_peaks	452.805	433.718
3	11800454	11801212	359	0.02038	7.27928	0.022495	merged_common_peaks	156.44	154.246
3	11814911	11822407	5164	-0.18943	7.36433	0.0105577	merged_common_peaks	154.302	175.953
3	11826435	11831603	2380	-0.02343	7.54955	0.0203426	merged_common_peaks	185.829	188.872
3	11839423	11847331	3887	-0.12749	8.24656	0.0092826	merged_common_peaks	290.585	317.432
3	11851978	11860535	4288	0.01166	8.77422	0.0133528	merged_common_peaks	439.601	436.062
3	11864944	11885906	10447	0.03143	8.46585	0.0144883	merged_common_peaks	357.442	349.739
3	11890637	11892108	693	-0.2772	7.67304	0.00280268	merged_common_peaks	185.393	224.666
3	11893282	11897098	1821	-0.16164	7.51583	0.0114266	merged_common_peaks	173.046	193.562
3	11899375	11901933	1268	-0.04066	8.28733	0.014952	merged_common_peaks	308.046	316.851
3	11927185	11949022	10913	0.09765	8.59049	0.00926887	merged_common_peaks	398.743	372.647
3	11964068	11966301	1106	0.17061	8.10393	0.00633123	merged_common_peaks	291.881	259.326
3	11972234	11972948	381	-0.01382	6.99125	0.0249096	merged_common_peaks	126.618	127.837
3	11980807	11984120	1667	-0.3818	7.51516	0.000801399	merged_common_peaks	160.259	208.812
3	11998127	12015062	8084	-0.04277	8.46461	0.01377	merged_common_peaks	348.068	358.541
3	12016767	12054661	18986	0.05697	8.36267	0.0136677	merged_common_peaks	335.729	322.73
3	12055931	12062586	3335	-0.02722	8.56394	0.014034	merged_common_peaks	374.892	382.032
3	12064941	12092206	13629	0.0046	8.44271	0.0151164	merged_common_peaks	348.499	347.389
3	12093683	12103563	4941	-0.13585	8.20999	0.00846001	merged_common_peaks	282.492	310.385
3	12105720	12121532	7889	0.11902	8.57364	0.00769646	merged_common_peaks	397.043	365.602
3	12128589	12134379	2894	-0.10794	8.20472	0.0109	merged_common_peaks	284.197	306.276
3	12144744	12157488	5216	0.14191	7.39924	0.0148624	merged_common_peaks	177.318	160.707
3	12160323	12164757	2254	-0.07657	8.54367	0.0111713	merged_common_peaks	363.393	383.2
3	12170154	12237255	33695	-0.07241	9.26003	0.00769924	merged_common_peaks	597.927	628.703
3	12242138	12265655	11722	-0.05036	9.20205	0.00980777	merged_common_peaks	578.779	599.34
3	12267748	12268821	541	-0.21558	7.31223	0.00905514	merged_common_peaks	147.487	171.257
3	12270396	12349239	47293	0.02407	7.55527	0.02029	merged_common_peaks	189.664	186.526
3	12367989	12448148	40479	0.00016	8.7489	0.0135999	merged_common_peaks	430.235	430.187
3	12455293	12455913	291	0.05901	6.73504	0.0257538	merged_common_peaks	108.725	104.368
3	12457623	12472035	7219	0.04805	8.74904	0.0121367	merged_common_peaks	437.478	423.147
3	12473527	12487395	6910	-0.06293	9.09928	0.00926171	merged_common_peaks	536.642	560.568
3	12488741	12558472	34779	0.01529	8.63318	0.0140118	merged_common_peaks	399.16	394.952
3	12560800	12572702	5937	0.00692	8.77379	0.0134445	merged_common_peaks	438.748	436.649
3	12575405	12590261	7201	0.0289	8.96856	0.0119872	merged_common_peaks	506.006	495.97
3	12602823	12630730	13961	-0.16262	9.01111	0.00244002	merged_common_peaks	487.683	545.872
3	12631926	12653557	1705	-0.03677	7.39177	0.0212377	merged_common_peaks	165.81	170.09
3	12668862	12786362	45237	-0.12853	8.80174	0.005455	merged_common_peaks	426.817	466.588
3	12789880	12797431	3066	-0.16734	7.3413	0.0127069	merged_common_peaks	153.026	171.846
3	12799528	12806919	3782	-0.17353	8.12982	0.0063859	merged_common_peaks	263.755	297.467
3	12810127	12816476	3190	-0.0378	7.83002	0.0179508	merged_common_peaks	224.585	230.547
3	12817799	12822775	2389	-0.09587	8.09567	0.0126808	merged_common_peaks	264.612	282.793
3	12823994	12848402	9250	-0.06614	7.42119	0.0200453	merged_common_peaks	167.512	175.37
3	12849669	12864806	7566	0.02211	8.94625	0.0123843	merged_common_peaks	497.07	489.51
3	12868173	12872168	1970	-0.05644	8.32678	0.0140715	merged_common_peaks	314.859	327.42
3	12875389	12877700	1162	-0.10408	7.50471	0.0165889	merged_common_peaks	175.177	188.282
3	12885443	12898753	5915	-0.18087	7.31967	0.0119463	merged_common_peaks	150.043	170.084
3	12901743	12904825	1542	-0.12116	7.81019	0.0125978	merged_common_peaks	215.211	234.066
3	12906483	12956151	24829	-0.06675	8.16893	0.0140198	merged_common_peaks	281.22	294.537
3	12957857	12970286	5897	-0.03365	8.98763	0.0116576	merged_common_peaks	501.743	513.583
3	12970940	13033567	39055	-0.07264	7.77161	0.0166122	merged_common_peaks	213.086	224.089
3	13042722	13044700	1182	-0.08226	7.59865	0.0173399	merged_common_peaks	188.382	199.436
3	13053529	13058584	2532	-0.11582	8.21728	0.0100818	merged_common_peaks	285.901	309.799
3	13067622	13068613	406	-0.06418	7.26953	0.0209533	merged_common_peaks	150.899	157.764
3	13071970	13152717	40381	-0.01993	8.44257	0.0149439	merged_common_peaks	345.515	350.321
3	13154995	13178029	11537	-0.1984	8.0973	0.004898	merged_common_peaks	255.663	293.354
3	13181756	13182188	215	-0.2801	7.00282	0.00739031	merged_common_peaks	116.386	141.325
3	13183302	13226512	21105	0.04757	8.59691	0.0128477	merged_common_peaks	393.63	380.862
3	13230111	13235015	2725	0.11667	8.28636	0.00968141	merged_common_peaks	325.09	299.835
3	13238148	13257090	9484	0.03945	8.64098	0.0130815	merged_common_peaks	404.699	393.782
3	13262833	13265577	1031	-0.0038	7.40827	0.0216198	merged_common_peaks	169.644	170.092
3	13266994	13268394	777	0.06846	7.24737	0.0205848	merged_common_peaks	155.589	148.379
3	13271210	13289697	9429	-0.01917	8.24637	0.0159615	merged_common_peaks	301.661	305.696
3	13297716	13302888	2565	0.00253	7.8793	0.0183531	merged_common_peaks	235.66	235.247
3	13304387	13307123	1360	0.07078	7.75372	0.0170908	merged_common_peaks	221.185	210.595
3	13311399	13326237	8129	-0.06823	8.58279	0.0113839	merged_common_peaks	374.462	392.597
3	13333323	13377223	21785	-0.05711	8.62879	0.0120588	merged_common_peaks	388.087	403.757
3	13378597	13480850	44099	0.00072	8.41617	0.0152484	merged_common_peaks	341.687	341.516
3	13494320	13525471	15308	-0.12979	8.06061	0.0100709	merged_common_peaks	255.241	279.268
3	13532275	13543041	5366	-0.07957	7.57429	0.017433	merged_common_peaks	185.401	195.914
3	13544120	13592955	46307	-0.44368	10.8281	1.49465e-21	merged_common_peaks	1558.84	2120.13
3	13594787	13841026	112600	-0.20304	10.3541	1.22582e-05	merged_common_peaks	1219.94	1404.29
3	13843326	14084377	97186	-0.04447	8.44234	0.01407	merged_common_peaks	342.534	353.257
3	14096028	14131990	16830	0.0161	8.32903	0.0156171	merged_common_peaks	323.379	319.79
3	14133506	14226571	82572	-0.16779	9.8674	0.000385363	merged_common_peaks	881.31	990.007
3	14233729	14238597	2435	0.21686	8.58978	0.00162583	merged_common_peaks	415.358	357.389
3	14241143	14272529	15640	-0.07863	8.68165	0.0103663	merged_common_peaks	399.578	421.961
3	14273480	14285001	5760	-0.05471	8.56781	0.012484	merged_common_peaks	372.334	386.725
3	14287429	14308174	10172	0.04232	8.02662	0.016417	merged_common_peaks	264.62	256.971
3	14312107	14315192	1613	-0.05142	7.87729	0.0171839	merged_common_peaks	230.973	239.354
3	14329559	14362784	18007	-0.01851	8.31172	0.0156155	merged_common_peaks	315.712	319.789
3	14365047	14398367	16246	0.18999	8.14593	0.00469961	merged_common_peaks	302.528	265.2
3	14400976	14470320	37151	-0.16999	8.54048	0.00399291	merged_common_peaks	351.038	394.936
3	14473986	14604211	54556	-0.05953	8.43	0.0131744	merged_common_peaks	337.849	352.081
3	14609107	14613922	2384	-0.02869	8.51127	0.0141282	merged_common_peaks	361.268	368.524
3	14615942	14675878	52054	-0.02587	7.94219	0.0176872	merged_common_peaks	243.749	248.16
3	14677940	14681746	2105	-0.06099	7.57491	0.0187632	merged_common_peaks	186.679	194.74
3	14682901	14685704	1350	-0.02402	7.28963	0.0222109	merged_common_peaks	155.161	157.766
3	14690588	14721849	15627	-0.0353	8.71133	0.01298	merged_common_peaks	414.055	424.312
3	14729250	14735244	2913	-0.00192	8.03707	0.0173864	merged_common_peaks	262.488	262.838
3	14738166	14748392	5192	0.05092	8.04078	0.0160874	merged_common_peaks	268.028	258.733
3	14749569	14750239	320	-0.10802	7.11857	0.0199825	merged_common_peaks	133.858	144.265
3	14762130	14810631	24372	0.21653	8.42401	0.00230328	merged_common_peaks	370.229	318.631
3	14812770	14836177	11697	-0.0043	8.70471	0.0137936	merged_common_peaks	416.612	417.855
3	14837465	14877469	21769	0.09228	8.42683	0.0107002	merged_common_peaks	355.319	333.303
3	14880982	14902656	10830	0.06258	7.88025	0.0165119	merged_common_peaks	240.775	230.554
3	14908146	14916959	4507	0.02393	7.70595	0.0191324	merged_common_peaks	210.535	207.071
3	14918211	14928335	6597	-0.0172	7.71772	0.0192256	merged_common_peaks	209.255	211.765
3	14931967	14941500	4786	0.03237	8.28045	0.0153845	merged_common_peaks	314.439	307.462
3	14949368	14952298	1674	-0.03493	7.91357	0.0174975	merged_common_peaks	238.212	244.05
3	14953608	14955015	896	-0.15183	7.15417	0.0159293	merged_common_peaks	135.135	150.132
3	14956314	14987814	15753	-0.0072	8.16085	0.0166152	merged_common_peaks	285.481	286.909
3	14989464	15007215	9529	-0.05835	8.42577	0.0131881	merged_common_peaks	336.998	350.907
3	15009662	15014899	2601	-0.00695	8.65807	0.0139958	merged_common_peaks	402.989	404.935
3	15022228	15022911	332	-0.04495	7.0213	0.0239714	merged_common_peaks	127.896	131.943
3	15024559	15048687	12680	-0.00341	8.52392	0.0146803	merged_common_peaks	367.657	368.527
3	15050912	15075811	12382	0.00784	8.12948	0.0167909	merged_common_peaks	280.8	279.278
3	15077670	15081597	1502	0.18039	7.80856	0.00787663	merged_common_peaks	238.65	210.6
3	15082953	15091196	3494	0.15127	7.36656	0.0141763	merged_common_peaks	173.91	156.598
3	15096391	15172286	45850	-0.0362	8.95297	0.0116351	merged_common_peaks	489.4	501.835
3	15173813	15178918	2388	-0.02902	8.36104	0.0151276	merged_common_peaks	325.504	332.118
3	15186349	15189676	1777	0.13069	7.5245	0.0140422	merged_common_peaks	192.651	175.966
3	15217865	15221614	2257	-0.11662	7.45738	0.0160964	merged_common_peaks	168.788	182.999
3	15229595	15233273	1626	0.11861	8.31531	0.00930134	merged_common_peaks	331.902	305.707
3	15245682	15272558	12444	-0.02232	9.41889	0.0103145	merged_common_peaks	679.218	689.808
3	15279156	15293120	7000	-0.04159	8.20152	0.0153411	merged_common_peaks	290.164	298.651
3	15295918	15331425	18257	-0.08849	8.26874	0.0119874	merged_common_peaks	299.102	318.022
3	15335614	15338805	1806	-0.00852	7.89521	0.0181994	merged_common_peaks	237.363	238.769
3	15350040	15352860	1417	0.04619	7.90114	0.017059	merged_common_peaks	242.903	235.249
3	15359566	15366803	3568	0.02814	8.70463	0.0132909	merged_common_peaks	421.299	413.161
3	15371847	15397213	12524	0.02464	8.41317	0.0148735	merged_common_peaks	343.815	337.993
3	15398376	15401472	1558	-0.13529	8.20754	0.00846001	merged_common_peaks	282.067	309.798
3	15408056	15430426	11171	-0.07198	8.36733	0.0124692	merged_common_peaks	322.094	338.572
3	15433753	15436050	1251	0.09227	7.86541	0.0145079	merged_common_peaks	240.776	225.858
3	15440103	15450026	5065	-0.14977	8.25133	0.00698192	merged_common_peaks	289.305	320.952
3	15454609	15468147	6850	0.0552	8.6467	0.0120076	merged_common_peaks	408.531	393.195
3	15469715	15474710	2547	0.09995	8.17253	0.0117412	merged_common_peaks	298.69	278.697
3	15476395	15482711	3162	-0.05335	8.06511	0.0156923	merged_common_peaks	262.912	272.816
3	15486438	15501284	7568	-0.04308	8.39425	0.0140526	merged_common_peaks	331.464	341.511
3	15506874	15509151	1349	-0.07354	7.77493	0.0165847	merged_common_peaks	213.51	224.676
3	15524544	15559433	20258	-0.02527	8.90162	0.0124751	merged_common_peaks	474.079	482.456
3	15561862	15562764	358	-0.14997	7.25846	0.0150155	merged_common_peaks	145.359	161.282
3	15570846	15597900	13543	-0.14707	8.65141	0.0049522	merged_common_peaks	382.118	423.126
3	15611350	15613953	1303	0.00108	7.44514	0.0213702	merged_common_peaks	174.33	174.2
3	15618886	15642279	14093	0.07171	7.17284	0.0215472	merged_common_peaks	147.922	140.749
3	15648185	15653224	2737	-0.17406	8.02628	0.00655302	merged_common_peaks	245.444	276.917
3	15687295	15697721	5203	0.04061	8.77504	0.012413	merged_common_peaks	444.286	431.954
3	15710024	15739769	12612	0.00421	9.10078	0.0120149	merged_common_peaks	549.846	548.244
3	15764175	15767455	1540	-0.12837	7.72853	0.0126586	merged_common_peaks	202.861	221.738
3	15786250	15799325	5366	0.16954	8.1357	0.00639654	merged_common_peaks	298.269	265.199
3	15804190	15810662	3258	0.1803	8.02126	0.0061513	merged_common_peaks	276.553	244.063
3	15812204	15818333	3271	0.04141	8.22017	0.015252	merged_common_peaks	302.518	293.958
3	15828304	15832853	2302	-0.13592	7.91418	0.0105023	merged_common_peaks	230.116	252.85
3	15847057	15854407	3693	-0.05403	8.60492	0.0123697	merged_common_peaks	382.126	396.708
3	15859434	15865170	2814	-0.02807	7.97815	0.0173109	merged_common_peaks	249.711	254.617
3	15873487	15875371	1149	-0.02635	7.26683	0.0225669	merged_common_peaks	152.605	155.417
3	15880562	15883783	1586	-0.11403	7.95825	0.0119664	merged_common_peaks	239.061	258.723
3	15898705	15900252	858	0.1101	7.54749	0.0158731	merged_common_peaks	194.354	180.073
3	15915793	15924017	4111	0.07464	8.67994	0.0106438	merged_common_peaks	420.878	399.657
3	15931372	15934575	1756	-0.06782	8.02965	0.0148392	merged_common_peaks	255.245	267.531
3	15943782	15945025	527	-0.0698	7.33997	0.0200695	merged_common_peaks	158.141	165.981
3	15954726	15956495	1000	-0.22327	7.80889	0.00521128	merged_common_peaks	207.541	242.279
3	15959343	15967952	4428	0.04237	8.80697	0.011945	merged_common_peaks	454.506	441.352
3	15996476	16000074	1799	0.06841	8.45251	0.01226	merged_common_peaks	358.72	342.107
3	16038933	16041254	1165	-0.02423	8.48331	0.0145345	merged_common_peaks	354.882	360.892
3	16064099	16067105	993	0.18237	7.91424	0.00671836	merged_common_peaks	256.964	226.451
3	16083744	16087811	2051	-0.08124	7.72901	0.0163451	merged_common_peaks	206.27	218.219
3	16100768	16106185	2702	-0.16679	8.44677	0.00453685	merged_common_peaks	329.327	369.688
3	16142983	16144152	609	0.11301	7.51083	0.0153439	merged_common_peaks	189.668	175.378
3	16158828	16163114	2134	0.0376	8.74581	0.0126834	merged_common_peaks	434.921	423.733
3	16173235	16183542	5112	-0.02166	8.89462	0.0124996	merged_common_peaks	472.375	479.521
3	16240698	16241766	511	0.23672	7.55817	0.00577485	merged_common_peaks	204.581	173.622
3	16244977	16249885	2239	0.0013	8.18853	0.0165013	merged_common_peaks	291.87	291.607
3	16331054	16341864	5941	-0.06659	9.2643	0.00827105	merged_common_peaks	600.91	629.296
3	16353704	16357433	1948	0.01938	7.75982	0.0189632	merged_common_peaks	218.2	215.289
3	16436549	16438487	970	0.08715	7.86285	0.0149739	merged_common_peaks	239.923	225.858
3	16498120	16501844	1835	-0.06015	8.18084	0.014628	merged_common_peaks	284.2	296.3
3	16510869	16513098	1078	0.07648	7.96235	0.0150743	merged_common_peaks	256.105	242.882
3	16548826	16549758	536	-0.03111	7.32839	0.0219407	merged_common_peaks	158.995	162.46
3	16589146	16596111	3443	-0.0926	8.75472	0.00862343	merged_common_peaks	418.307	446.037
3	16601043	16604187	1603	-0.0704	8.46957	0.012219	merged_common_peaks	345.938	363.238
3	16636012	16647372	5665	0.07763	8.33578	0.0125439	merged_common_peaks	331.898	314.511
3	16669876	16672616	1371	-0.06806	8.51212	0.0121078	merged_common_peaks	356.582	373.807
3	16682413	16682868	249	-0.11469	7.1671	0.0183066	merged_common_peaks	138.118	149.546
3	16691189	16700114	4457	-0.03026	8.88323	0.012312	merged_common_peaks	467.266	477.17
3	16709243	16712355	1466	0.10008	7.79626	0.0146865	merged_common_peaks	230.129	214.706
3	16809241	16814133	2433	0.07589	8.88941	0.00931721	merged_common_peaks	486.857	461.909
3	16829291	16831945	1321	-0.02573	8.08821	0.0166944	merged_common_peaks	269.725	274.579
3	16839852	16840427	322	0.06635	6.63795	0.0265333	merged_common_peaks	101.908	97.3275
3	16876396	16877817	708	-0.04003	7.90057	0.017565	merged_common_peaks	235.659	242.289
3	16880426	16882341	989	0.10479	7.62709	0.0156516	merged_common_peaks	205.001	190.638
3	16899129	16901059	901	-0.0662	7.59388	0.0182574	merged_common_peaks	188.809	197.674
3	16957352	16962811	2734	0.01226	9.07197	0.0120692	merged_common_peaks	540.481	535.907
3	17055308	17058249	1597	-0.11918	8.03837	0.0109831	merged_common_peaks	252.262	273.986
3	17067771	17068898	549	0.12685	7.71174	0.0132392	merged_common_peaks	219.057	200.619
3	17070698	17071585	404	0.11883	7.23792	0.0180851	merged_common_peaks	157.296	144.859
3	17100294	17101057	393	-0.02811	7.19334	0.0229329	merged_common_peaks	144.937	147.789
3	17106520	17115009	4208	-0.13862	8.45857	0.00661869	merged_common_peaks	335.289	369.103
3	17116924	17117601	405	0.00831	7.17089	0.0234065	merged_common_peaks	144.512	143.682
3	17226016	17227206	637	-0.01504	7.47071	0.0210695	merged_common_peaks	176.459	178.308
3	17356769	17358079	645	0.05272	7.85683	0.0172794	merged_common_peaks	236.089	227.618
3	17362977	17368297	2654	0.0313	8.32334	0.0151613	merged_common_peaks	323.807	316.857
3	17392018	17395055	1626	0.11614	8.39751	0.00895083	merged_common_peaks	351.062	323.908
3	17402413	17418015	7819	0.08723	8.56927	0.0102165	merged_common_peaks	391.504	368.534
3	17429692	17437394	3855	0.01314	8.8377	0.0130063	merged_common_peaks	459.611	455.444
3	17469836	17470911	553	-0.02326	7.47133	0.020893	merged_common_peaks	176.033	178.894
3	17663531	17666942	1521	0.11463	8.03619	0.0114424	merged_common_peaks	273.142	252.279
3	17683011	17683874	450	-0.2381	7.3966	0.00681344	merged_common_peaks	155.153	182.994
3	17978526	17985487	3528	-0.0056	9.06145	0.0121818	merged_common_peaks	533.243	535.317
3	18069407	18070275	537	0.23239	6.91598	0.0112385	merged_common_peaks	130.887	111.414
3	18109965	18112718	1485	0.06681	7.86016	0.0162391	merged_common_peaks	237.793	227.032
3	18543520	18544611	466	0.07378	7.34392	0.0195287	merged_common_peaks	166.665	158.356
3	18630274	18631975	1102	0.22732	7.27456	0.00829326	merged_common_peaks	167.524	143.102
3	18646164	18647134	491	-0.10915	7.49315	0.0160151	merged_common_peaks	173.474	187.108
3	18652561	18654813	1197	0.08779	8.45476	0.0106675	merged_common_peaks	361.701	340.348
3	18734224	18739927	2868	0.10111	8.44641	0.00999666	merged_common_peaks	361.278	336.825
3	18757138	18758087	533	-0.20764	7.09777	0.0116281	merged_common_peaks	127.464	147.196
3	18791063	18796348	2631	0.05465	9.09002	0.0100572	merged_common_peaks	555.385	534.74
3	18843528	18845365	846	0.02219	7.74142	0.0189163	merged_common_peaks	215.645	212.354
3	18864483	18865210	358	0.17158	7.05052	0.0151264	merged_common_peaks	140.684	124.909
3	18885941	18887370	720	-0.0581	8.05339	0.0154442	merged_common_peaks	260.356	271.055
3	18927742	18928412	343	0.13693	7.18121	0.0167118	merged_common_peaks	152.184	138.404
3	19133581	19134737	529	0.19893	7.53438	0.00834613	merged_common_peaks	198.617	173.034
3	19242956	19243774	442	0.03532	7.27573	0.0220652	merged_common_peaks	156.866	153.072
3	19622296	19622684	188	0.01482	6.97208	0.0251061	merged_common_peaks	126.193	124.903
3	19776831	19778634	868	-0.00265	7.81792	0.0187543	merged_common_peaks	225.439	225.854
3	20200967	20203631	1156	-0.14313	7.52071	0.0133952	merged_common_peaks	174.75	192.976
3	20206646	20208240	803	-0.03241	7.4477	0.0208289	merged_common_peaks	172.625	176.547
3	20233834	20234786	436	-0.12396	7.28713	0.0172142	merged_common_peaks	149.619	163.043
3	20259103	20260381	661	-0.05948	8.07748	0.0153331	merged_common_peaks	264.613	275.751
3	20304684	20310064	2710	0.01222	9.02699	0.0122029	merged_common_peaks	523.883	519.464
3	20483270	20484392	699	-0.12976	7.23135	0.0173665	merged_common_peaks	143.656	157.175
3	20584828	20585523	279	0.13461	7.43713	0.0141263	merged_common_peaks	181.577	165.401
3	20657906	20659002	530	-0.02366	7.56283	0.0202377	merged_common_peaks	187.533	190.634
3	20726250	20728941	1342	0.01573	8.89017	0.0127776	merged_common_peaks	477.063	471.889
3	20989499	20991077	786	-0.09727	8.12168	0.0122258	merged_common_peaks	269.295	288.078
3	21322739	21329478	3452	-0.01927	8.98655	0.0122207	merged_common_peaks	503.873	510.648
3	21880796	21883237	1734	-0.06312	7.36357	0.020405	merged_common_peaks	161.122	168.328
3	22059215	22064926	2863	-0.06017	8.95108	0.0103593	merged_common_peaks	484.716	505.359
3	22113207	22115628	1167	0.04255	8.3607	0.0144105	merged_common_peaks	333.6	323.905
3	22223937	22227208	1675	-0.24009	7.35335	0.00667667	merged_common_peaks	150.467	177.712
3	22232725	22242471	4921	-0.04606	8.62801	0.0127452	merged_common_peaks	389.365	401.997
3	22382910	22391566	4421	0.10932	8.87649	0.00678502	merged_common_peaks	488.14	452.518
3	22524470	22530199	2876	0.00397	8.8516	0.0130923	merged_common_peaks	462.588	461.317
3	22569006	22570411	661	-0.01637	7.76921	0.0190077	merged_common_peaks	216.921	219.396
3	22585634	22591275	2824	0.04238	8.87814	0.0118862	merged_common_peaks	477.491	463.669
3	22660453	22662360	971	0.11378	8.08526	0.0109652	merged_common_peaks	282.508	261.084
3	22695441	22700630	2579	0.02324	9.13634	0.0114714	merged_common_peaks	567.297	558.232
3	22767102	22767642	283	-0.03804	7.3961	0.0209272	merged_common_peaks	166.235	170.676
3	23108940	23115769	3412	0.05977	9.17122	0.00914984	merged_common_peaks	588.584	564.698
3	23157282	23158096	404	-0.08109	7.50719	0.0182205	merged_common_peaks	176.882	187.109
3	23203710	23207290	1799	0.11727	8.78967	0.00645221	merged_common_peaks	460.898	424.916
2	1023	10497	7011	-0.45932	10.6198	3.4956e-20	merged_common_peaks	1341.94	1845.02
2	12944	51709	32513	0.04304	8.90204	0.0114641	merged_common_peaks	485.578	471.306
2	58201	69963	5960	0.05624	8.65368	0.0119872	merged_common_peaks	410.66	394.959
2	71333	72395	619	0.2585	7.2663	0.00698695	merged_common_peaks	168.377	140.756
2	243884	249906	2842	0.02297	8.26746	0.0157328	merged_common_peaks	310.607	305.7
2	373211	378631	2715	0.10797	9.0047	0.00616616	merged_common_peaks	533.256	494.805
2	530189	537679	3730	0.06619	8.87905	0.0100533	merged_common_peaks	481.751	460.148
2	566222	582648	8207	0.0563	8.17779	0.0149307	merged_common_peaks	295.28	283.979
2	667186	667950	369	0.02747	7.2718	0.0223499	merged_common_peaks	156.014	153.072
2	752507	753961	654	-0.2541	7.63474	0.00430812	merged_common_peaks	181.987	217.036
2	808290	808846	266	0.08649	6.93139	0.0223891	merged_common_peaks	125.769	118.451
2	819028	825852	3401	0.07429	8.62357	0.0107399	merged_common_peaks	404.702	384.389
2	895814	896356	316	-0.11915	7.16487	0.0183066	merged_common_peaks	137.691	149.546
2	909784	914419	2411	-0.05231	8.4191	0.0134712	merged_common_peaks	336.146	348.558
2	925370	934330	4518	0.13648	8.45402	0.00661264	merged_common_peaks	367.668	334.481
2	1010932	1012839	960	-0.05226	7.89095	0.0168028	merged_common_peaks	233.102	241.701
2	1085205	1086922	854	0.03645	8.09757	0.0163043	merged_common_peaks	277.394	270.474
2	1108389	1110844	1241	-0.0638	8.30487	0.0135874	merged_common_peaks	309.323	323.309
2	1198197	1204164	3196	-0.00442	7.72011	0.0194087	merged_common_peaks	210.533	211.179
2	1206751	1209465	1362	0.01754	7.71496	0.0193626	merged_common_peaks	211.385	208.831
2	1218345	1219888	740	-0.13752	7.73915	0.0120891	merged_common_peaks	203.712	224.086
2	1221759	1222511	395	0.18605	7.12399	0.0133782	merged_common_peaks	148.778	130.777
2	1226142	1232396	3102	-0.18968	8.21277	0.00455943	merged_common_peaks	277.805	316.84
2	1251651	1254267	972	-0.02031	7.50093	0.0208383	merged_common_peaks	179.866	182.416
2	1264979	1271854	3425	0.02678	8.31034	0.0155173	merged_common_peaks	320.4	314.507
2	1287757	1289039	577	0.03302	7.5733	0.0197675	merged_common_peaks	192.646	188.287
2	1293113	1314322	10576	0.0553	7.71344	0.0180308	merged_common_peaks	213.944	205.899
2	1327082	1330291	1598	-0.02653	8.09089	0.0166944	merged_common_peaks	270.152	275.165
2	1342094	1345804	1538	-0.19217	7.57308	0.00843398	merged_common_peaks	178.156	203.54
2	1387182	1392755	2783	0.00482	8.60416	0.0142615	merged_common_peaks	389.795	388.494
2	1395185	1399500	2148	0.22445	7.76057	0.00547681	merged_common_peaks	234.395	200.623
2	1401405	1402694	760	-0.16147	7.33435	0.0134497	merged_common_peaks	152.6	170.672
2	1412660	1413528	444	-0.05663	7.57274	0.0191561	merged_common_peaks	186.68	194.154
2	1420740	1425854	2464	0.02775	7.92043	0.0176459	merged_common_peaks	244.604	239.944
2	1433843	1438855	2671	0.10367	8.22515	0.0112818	merged_common_peaks	310.185	288.678
2	1465006	1466543	997	0.15852	7.21025	0.0150535	merged_common_peaks	156.445	140.166
2	1485575	1491335	2707	0.0154	8.50782	0.0146194	merged_common_peaks	365.954	362.069
2	1505438	1513275	3950	-0.04561	8.41758	0.014175	merged_common_peaks	336.573	347.383
2	1547638	1553729	3056	-0.02209	8.25595	0.0158067	merged_common_peaks	303.364	308.045
2	1599862	1602341	1150	0.08085	7.86344	0.0154237	merged_common_peaks	239.497	226.445
2	1605759	1609609	1958	-0.13399	8.36357	0.00749906	merged_common_peaks	314.426	345.027
2	1614665	1618020	1700	-0.0751	8.06659	0.0143503	merged_common_peaks	261.205	275.162
2	1627663	1637529	5416	-0.34778	9.04188	5.40412e-06	merged_common_peaks	467.23	594.598
2	1649017	1655655	2505	-0.07826	8.13706	0.0137665	merged_common_peaks	273.981	289.253
2	1664585	1668418	1905	-0.06807	8.37678	0.0130608	merged_common_peaks	324.651	340.336
2	1670378	1672599	1123	-0.15478	8.1017	0.00751051	merged_common_peaks	260.35	289.835
2	1727878	1730015	761	-0.23609	7.38366	0.00735232	merged_common_peaks	153.875	181.233
2	1740907	1774744	17031	0.069	7.66581	0.0174993	merged_common_peaks	207.981	198.268
2	1776335	1779405	1478	0.09034	7.94821	0.0138518	merged_common_peaks	254.828	239.36
2	1781513	1787535	2877	-0.00943	8.65474	0.014013	merged_common_peaks	401.714	404.348
2	1793727	1797407	1747	0.0065	8.08571	0.0170967	merged_common_peaks	272.282	271.058
2	1801967	1803347	757	0.16715	7.68034	0.0103459	merged_common_peaks	217.356	193.577
2	1804992	1821613	8319	-0.02567	8.03482	0.0169943	merged_common_peaks	259.931	264.597
2	1828100	1840945	5942	-0.03744	8.1189	0.0159671	merged_common_peaks	274.408	281.623
2	1847722	1851025	1630	0.02869	7.93495	0.0175774	merged_common_peaks	247.159	242.292
2	1880046	1890340	5184	-0.04622	8.70786	0.012463	merged_common_peaks	411.5	424.897
2	1897859	1898931	533	-0.16419	7.09046	0.0159966	merged_common_peaks	128.744	144.263
2	1905243	1913858	3988	0.01166	8.77422	0.0133528	merged_common_peaks	439.601	436.062
2	1943902	1946116	1059	-0.32837	7.53376	0.00173319	merged_common_peaks	165.372	207.641
2	1949507	1954753	2011	-0.01153	8.10147	0.0169416	merged_common_peaks	273.558	275.753
2	1956581	1959784	1563	0.04117	7.85477	0.0175773	merged_common_peaks	234.811	228.205
2	1963686	1965438	708	0.246	7.57737	0.00492552	merged_common_peaks	207.99	175.384
2	1970314	1975373	2372	0.09312	8.33543	0.0111554	merged_common_peaks	333.603	312.751
2	1996079	2011147	7462	0.08847	8.44762	0.0110076	merged_common_peaks	360	338.588
2	2021266	2021582	154	-0.04661	7.1898	0.0226981	merged_common_peaks	143.658	148.375
2	2035981	2054271	9172	0.07977	8.85042	0.00910421	merged_common_peaks	474.513	448.989
2	2059543	2065037	2535	0.08181	7.85266	0.0154449	merged_common_peaks	237.793	224.684
2	2073266	2080438	3598	-0.02186	8.76133	0.0132596	merged_common_peaks	430.658	437.233
2	2089279	2117352	14041	-0.03369	7.78352	0.018457	merged_common_peaks	217.772	222.917
2	2122229	2129067	3408	0.08945	8.5284	0.0102609	merged_common_peaks	380.862	357.965
2	2133509	2137269	1937	-0.05287	8.43573	0.0134124	merged_common_peaks	339.977	352.668
2	2148136	2151316	1588	-0.0161	7.7999	0.0187956	merged_common_peaks	221.606	224.092
2	2154784	2156995	1059	-0.04157	7.85363	0.0175773	merged_common_peaks	227.993	234.658
2	2158322	2158736	220	-0.1203	7.08278	0.0193821	merged_common_peaks	130.024	141.331
2	2163377	2170624	3625	-0.04415	7.80836	0.0178197	merged_common_peaks	220.752	227.612
2	2185827	2197104	4478	0.0448	8.57311	0.0131464	merged_common_peaks	386.818	374.99
2	2202008	2213424	5397	0.02419	8.63334	0.0138366	merged_common_peaks	400.438	393.78
2	2217480	2227805	4619	-0.01005	7.98384	0.0176566	merged_common_peaks	252.268	254.032
2	2236772	2239102	1125	-0.02627	7.85404	0.0182327	merged_common_peaks	229.27	233.483
2	2249406	2250476	564	-0.08424	7.37794	0.0193506	merged_common_peaks	161.548	171.262
2	2251663	2256947	2452	0.01289	7.79921	0.0187956	merged_common_peaks	223.736	221.746
2	2262610	2264515	1081	-0.04483	7.68376	0.018531	merged_common_peaks	202.439	208.829
2	2273739	2282413	4395	0.09949	8.75664	0.00806433	merged_common_peaks	447.699	417.866
2	2294270	2307565	5267	0.14066	7.61814	0.0127175	merged_common_peaks	206.281	187.119
2	2364664	2371243	3419	0.05228	8.33917	0.0140208	merged_common_peaks	329.769	318.032
2	2373507	2411904	19190	-0.07602	8.13818	0.0137665	merged_common_peaks	274.406	289.253
2	2413911	2424193	5367	-0.04507	8.64943	0.0126698	merged_common_peaks	395.325	407.87
2	2437213	2454570	8678	0.04391	8.3692	0.0143735	merged_common_peaks	335.729	325.665
2	2461075	2513410	26193	0.07005	8.40294	0.0123847	merged_common_peaks	346.801	330.365
2	2514912	2518858	1682	0.15598	7.99514	0.00865294	merged_common_peaks	269.311	241.713
2	2520940	2583814	35829	-0.09496	8.39776	0.0103786	merged_common_peaks	326.351	348.554
2	2592199	2610856	10854	-0.13556	7.81739	0.011525	merged_common_peaks	215.211	236.414
2	2615056	2628446	6845	-0.0043	8.70471	0.0137936	merged_common_peaks	416.612	417.855
2	2631896	2652396	11998	0.02031	8.37549	0.0152911	merged_common_peaks	334.45	329.774
2	2660239	2695897	19488	-0.12744	8.57246	0.00677154	merged_common_peaks	364.239	397.877
2	2698704	2729705	15434	0.04074	8.20827	0.0155285	merged_common_peaks	299.963	291.611
2	2732866	2734442	769	-0.01395	7.66224	0.01969	merged_common_peaks	201.588	203.547
2	2739677	2755931	8125	0.07722	8.54575	0.0111644	merged_common_peaks	383.84	363.835
2	2766199	2822288	27566	0.01517	8.11483	0.0167901	merged_common_peaks	278.67	275.755
2	2823785	2841530	8873	-0.02554	8.5955	0.0138974	merged_common_peaks	383.406	390.254
2	2844150	2849764	2843	-0.05279	8.67027	0.0121708	merged_common_peaks	400.005	414.913
2	2854506	2857559	1586	-0.04412	8.51728	0.0135648	merged_common_peaks	360.841	372.047
2	2870112	2887293	8606	-0.07413	8.73518	0.0102882	merged_common_peaks	415.33	437.229
2	2902463	2911390	3426	0.05713	8.32553	0.0140715	merged_common_peaks	327.215	314.511
2	2913555	2918385	2283	-0.08833	7.4101	0.0186708	merged_common_peaks	164.956	175.371
2	2932514	2938819	3134	0.15387	8.26777	0.00664916	merged_common_peaks	325.092	292.205
2	2941149	2948358	3385	-0.15545	8.26685	0.00664916	merged_common_peaks	291.858	325.063
2	2952424	2954739	1166	-0.1206	7.82129	0.0125865	merged_common_peaks	216.916	235.828
2	2962893	2964146	622	-0.10241	7.60545	0.0157118	merged_common_peaks	187.955	201.782
2	2968101	2974574	3503	-0.15115	8.20234	0.00766438	merged_common_peaks	279.512	310.385
2	2986154	2992330	3097	-0.16122	7.60511	0.0108683	merged_common_peaks	184.12	205.889
2	2994765	3012433	8392	0.00896	8.15708	0.0166733	merged_common_peaks	286.335	284.562
2	3014520	3044930	15197	0.00875	7.98657	0.0176915	merged_common_peaks	254.398	252.86
2	3057493	3118139	28961	-0.08695	9.05052	0.00778801	merged_common_peaks	514.506	546.469
2	3119589	3167279	20167	-0.05214	7.93246	0.0166011	merged_common_peaks	239.917	248.746
2	3170538	3174159	1724	-0.07782	7.88515	0.0153398	merged_common_peaks	230.12	242.873
2	3175386	3179605	2051	-0.04567	8.11178	0.0157616	merged_common_peaks	272.28	281.037
2	3181110	3189909	4402	-0.00683	8.06963	0.0171916	merged_common_peaks	268.023	269.295
2	3198820	3211558	6380	-0.08243	8.20917	0.0128391	merged_common_peaks	287.607	304.518
2	3213527	3513077	140706	-0.13877	9.18997	0.00305472	merged_common_peaks	556.634	612.835
2	3516865	3523871	3510	-0.22024	8.11779	0.00321759	merged_common_peaks	257.365	299.811
2	3528569	3533832	1969	0.18913	7.35821	0.0112616	merged_common_peaks	175.19	153.665
2	3535924	3563170	13647	-0.04218	9.48901	0.0090263	merged_common_peaks	708.154	729.164
2	3565307	3571953	3361	0.02859	8.5491	0.0141038	merged_common_peaks	378.302	370.879
2	3573273	3580457	3591	0.04129	8.06833	0.0164416	merged_common_peaks	272.285	264.603
2	3581653	3602075	9203	-0.06448	8.17868	0.0143254	merged_common_peaks	283.35	296.301
2	3603403	3607967	2814	-0.36074	10.3967	5.44807e-12	merged_common_peaks	1189.69	1527.66
2	3612378	3628036	8453	-0.40517	10.7019	3.43408e-17	merged_common_peaks	1447.43	1916.75
2	3629178	3629615	213	-0.08022	8.65451	0.0104078	merged_common_peaks	391.916	414.325
2	3632592	3665959	16888	-0.1057	7.93598	0.0129499	merged_common_peaks	236.08	254.026
2	3675897	3720371	27067	-0.01208	8.15249	0.0165857	merged_common_peaks	283.352	285.734
2	3721592	3778049	28428	-0.21548	8.02681	0.00407908	merged_common_peaks	242.035	281.024
2	3783863	3797601	6882	-0.04215	8.32354	0.0147881	merged_common_peaks	315.712	325.072
2	3799786	3803340	2588	0.15888	7.48467	0.0127412	merged_common_peaks	189.245	169.51
2	3804529	4004973	81469	-0.04501	8.94856	0.0111484	merged_common_peaks	486.419	501.834
2	4007259	4018812	5782	-0.0106	8.17967	0.0165011	merged_common_peaks	288.889	291.019
2	4027152	4032560	2834	-0.12966	7.596	0.0139631	merged_common_peaks	184.973	202.367
2	4033751	4047744	7556	0.03195	8.39155	0.0146694	merged_common_peaks	339.561	332.123
2	4049989	4067917	6919	0.04957	8.59122	0.0128737	merged_common_peaks	392.352	379.1
2	4069155	4075762	3478	-0.13264	8.1302	0.00965309	merged_common_peaks	267.59	293.358
2	4077952	4079781	960	0.06978	7.80068	0.0168817	merged_common_peaks	228.424	217.638
2	4087443	4097070	4837	0.08704	8.68826	0.00951087	merged_common_peaks	425.136	400.245
2	4105485	4140708	17645	0.04442	8.69212	0.0125228	merged_common_peaks	420.025	407.289
2	4148762	4214750	32910	-0.02722	8.85786	0.0126491	merged_common_peaks	459.605	468.359
2	4216847	4222453	2780	0.12547	8.17002	0.00966621	merged_common_peaks	300.82	275.763
2	4226782	4261840	17529	0.09146	8.29895	0.0115716	merged_common_peaks	325.087	305.117
2	4265197	4268579	1664	0.02219	7.74142	0.0189163	merged_common_peaks	215.645	212.354
2	4269892	4273319	2244	0.17353	7.05825	0.014221	merged_common_peaks	141.535	125.495
2	4275443	4303047	13125	-0.04731	8.77547	0.0120504	merged_common_peaks	431.081	445.452
2	4318378	4322140	1866	-0.03031	8.20432	0.0159247	merged_common_peaks	291.867	298.063
2	4323272	4326367	1447	0.10114	8.11102	0.0122412	merged_common_peaks	286.341	266.954
2	4328347	4331573	1652	-0.0165	7.58845	0.0200833	merged_common_peaks	191.367	193.568
2	4332916	4333602	338	0.00944	7.28474	0.0225676	merged_common_peaks	156.439	155.419
2	4334767	4340343	2714	0.0528	7.74874	0.0178516	merged_common_peaks	219.054	211.182
2	4354029	4354473	227	-0.01564	6.92255	0.0255135	merged_common_peaks	120.654	121.969
2	4357375	4359994	1262	-0.00567	8.08274	0.0170967	merged_common_peaks	270.579	271.644
2	4361497	4415734	27143	0.05526	8.91353	0.0106507	merged_common_peaks	491.538	473.067
2	4424124	4428661	2383	0.08299	7.64695	0.0171277	merged_common_peaks	206.278	194.747
2	4430003	4437966	3975	-0.03809	7.99297	0.0168451	merged_common_peaks	251.415	258.141
2	4439741	4448892	4449	0.0922	7.98065	0.0137708	merged_common_peaks	260.791	244.646
2	4451550	4456138	2327	0.04651	8.3679	0.0141564	merged_common_peaks	335.729	325.079
2	4459832	4471282	5584	-0.08988	8.78243	0.00888775	merged_common_peaks	426.822	454.259
2	4486057	4523996	14783	0.03047	8.3959	0.0148236	merged_common_peaks	340.411	333.297
2	4525991	4568266	27829	-0.05963	7.47194	0.0197515	merged_common_peaks	173.901	181.24
2	4569550	4618109	30004	0.02815	8.34562	0.0152152	merged_common_peaks	328.488	322.14
2	4622094	4650275	13649	-0.05394	8.11365	0.0154822	merged_common_peaks	271.852	282.209
2	4654531	4741992	46058	0.03355	8.57873	0.0136765	merged_common_peaks	386.816	377.925
2	4752749	4757741	2168	-0.09278	7.63935	0.0161581	merged_common_peaks	193.067	205.891
2	4771702	4792906	10631	0.0292	8.43042	0.0146433	merged_common_peaks	348.501	341.519
2	4796091	4798318	1502	-0.10875	7.29993	0.0178673	merged_common_peaks	151.75	163.631
2	4808048	4869541	30710	-0.10864	8.30324	0.0100633	merged_common_peaks	304.209	328.002
2	4873220	4889279	7867	0.02514	8.49622	0.014477	merged_common_peaks	364.251	357.959
2	4894652	4899054	2202	-0.01313	8.35875	0.0154523	merged_common_peaks	326.782	329.77
2	4900576	4938871	14614	0.08088	8.11037	0.0138404	merged_common_peaks	284.209	268.714
2	4945169	4946876	1045	-0.05327	7.2963	0.0212462	merged_common_peaks	154.308	160.112
2	4948727	5002833	27044	0.01716	8.74753	0.0134114	merged_common_peaks	432.366	427.254
2	5009362	5018023	4415	-0.02197	8.28595	0.0156359	merged_common_peaks	309.751	314.504
2	5020952	5048599	14030	0.02277	8.50917	0.0144202	merged_common_peaks	367.234	361.483
2	5057827	5067884	4980	0.20491	8.37228	0.00294103	merged_common_peaks	355.754	308.649
2	5076517	5112094	19746	0.02074	8.47975	0.0145538	merged_common_peaks	359.568	354.436
2	5121028	5158892	18964	0.04839	8.55214	0.013006	merged_common_peaks	381.71	369.12
2	5160459	5163514	1541	0.10006	7.96014	0.0133693	merged_common_peaks	257.811	240.536
2	5171712	5189261	10573	0.05019	7.54546	0.0196488	merged_common_peaks	190.092	183.593
2	5190996	5196815	2899	-0.16189	8.59305	0.00434183	merged_common_peaks	365.089	408.444
2	5198106	5213819	5918	-0.19793	10.1225	4.47817e-05	merged_common_peaks	1040.85	1193.91
2	5215669	5246062	13404	-0.11903	9.00312	0.00506216	merged_common_peaks	492.372	534.718
2	5247608	5313264	32831	0.0387	8.60134	0.0132369	merged_common_peaks	393.628	383.21
2	5315032	5319609	2176	-0.09318	7.62676	0.016205	merged_common_peaks	191.363	204.131
2	5321060	5389155	34253	0.0252	8.32828	0.0154243	merged_common_peaks	324.231	318.617
2	5394627	5400340	2713	-0.10728	8.59737	0.0083316	merged_common_peaks	373.181	401.988
2	5402925	5406014	1085	-0.30327	7.24342	0.00425334	merged_common_peaks	136.408	168.319
2	5410078	5416048	3258	-0.06389	7.78728	0.0169407	merged_common_peaks	216.067	225.851
2	5422461	5425156	1415	-0.15457	7.42445	0.0134367	merged_common_peaks	162.823	181.237
2	5426139	5433101	3565	0.06141	7.65773	0.0183288	merged_common_peaks	206.276	197.68
2	5434791	5463525	15783	-0.0479	8.03645	0.0161132	merged_common_peaks	258.228	266.945
2	5468468	5504173	17444	-0.12211	7.77307	0.0131709	merged_common_peaks	209.676	228.195
2	5509401	5510778	659	0.17102	7.46555	0.0113852	merged_common_peaks	187.541	166.576
2	5516654	5520523	1966	-0.03661	8.28132	0.0151891	merged_common_peaks	307.196	315.091
2	5521755	5534608	6713	0.00846	8.0551	0.0172235	merged_common_peaks	266.747	265.188
2	5556881	5583686	13380	-0.06084	9.12432	0.00922564	merged_common_peaks	546.433	569.969
2	5585291	5586247	515	0.17339	7.29415	0.0126821	merged_common_peaks	166.669	147.795
2	5598534	5606721	3989	0.02418	9.01161	0.0120368	merged_common_peaks	520.48	511.83
2	5609757	5610259	248	-0.00753	7.05915	0.0243466	merged_common_peaks	133.009	133.706
2	5612515	5636854	12175	0.08453	8.86221	0.00883985	merged_common_peaks	479.197	451.927
2	5646586	5647301	335	0.00918	7.25711	0.0227874	merged_common_peaks	153.458	152.485
2	5657084	5660014	1455	-0.06612	8.10154	0.0145947	merged_common_peaks	268.444	281.034
2	5665227	5669350	2321	-0.25059	7.94453	0.00277259	merged_common_peaks	225.852	268.695
2	5709755	5732542	4066	0.03959	8.096	0.0163043	merged_common_peaks	277.394	269.886
2	5734015	5737907	2011	-0.06019	7.88698	0.0164844	merged_common_peaks	231.824	241.7
2	5740290	5741264	564	0.3406	7.18831	0.00326252	merged_common_peaks	164.12	129.608
2	5763446	5765121	853	-0.15267	7.82308	0.00993394	merged_common_peaks	214.784	238.76
2	5777445	5788021	5328	-0.02362	8.95419	0.0122617	merged_common_peaks	491.954	500.075
2	5792028	5802708	5418	0.15004	8.3612	0.00646472	merged_common_peaks	346.382	312.168
2	5804887	5830767	12939	0.10843	8.09228	0.0118383	merged_common_peaks	283.361	262.844
2	5844660	5858027	5119	-0.03345	8.85294	0.0122842	merged_common_peaks	457.052	467.773
2	5868143	5870522	1731	-0.13031	7.4459	0.0154721	merged_common_peaks	166.658	182.412
2	5876023	5905893	14940	-0.01492	8.57893	0.0142784	merged_common_peaks	380.425	384.38
2	5939188	5940258	477	0.10623	7.32771	0.0177752	merged_common_peaks	166.667	154.836
2	5943541	5945864	1209	-0.00546	7.75524	0.019183	merged_common_peaks	215.644	216.462
2	5947089	5948149	587	-0.0903	7.38476	0.0187881	merged_common_peaks	161.973	172.435
2	5960280	5976448	8047	-0.05764	8.53759	0.0125775	merged_common_peaks	364.246	379.094
2	5982221	6003447	10571	-0.04252	8.95487	0.0113024	merged_common_peaks	488.973	503.598
2	6005021	6012917	4197	0.00492	8.06605	0.0172236	merged_common_peaks	268.45	267.536
2	6027083	6031269	2092	0.0244	8.68002	0.0135102	merged_common_peaks	413.637	406.7
2	6044126	6047509	1669	-0.1506	8.44797	0.00567075	merged_common_peaks	331.455	367.926
2	6055097	6056949	989	-0.22546	7.67995	0.00567884	merged_common_peaks	189.653	221.733
2	6060171	6084992	13902	-0.10367	8.50559	0.00929592	merged_common_peaks	350.618	376.74
2	6091485	6099151	3686	-0.16291	7.98524	0.00773583	merged_common_peaks	239.484	268.113
2	6101077	6101894	515	0.04096	6.97837	0.0243246	merged_common_peaks	127.898	124.318
2	6105011	6130678	12476	-0.01055	8.51574	0.0147001	merged_common_peaks	364.674	367.351
2	6131895	6141422	5085	-0.05845	8.49868	0.012697	merged_common_peaks	354.454	369.109
2	6148758	6153918	2641	-0.01706	8.36447	0.0153362	merged_common_peaks	327.634	331.531
2	6155530	6165195	4274	-0.05512	8.33002	0.0140545	merged_common_peaks	315.711	328.006
2	6176246	6180526	2110	0.13716	8.12904	0.00879941	merged_common_peaks	293.582	266.956
2	6192451	6199165	3224	-0.05146	7.45722	0.0201922	merged_common_peaks	172.624	178.893
2	6217134	6224803	4140	-0.10447	8.23927	0.0108757	merged_common_peaks	291.436	313.323
2	6227776	6234720	3343	-0.00424	8.45766	0.0150304	merged_common_peaks	351.052	352.085
2	6246844	6247688	419	0.00733	7.2338	0.0229376	merged_common_peaks	150.902	150.137
2	6249086	6253675	2818	-0.20622	8.18295	0.00391141	merged_common_peaks	270.567	312.142
2	6255557	6271768	8113	0.11234	8.34775	0.00930604	merged_common_peaks	338.713	313.339
2	6293832	6296365	1412	0.1688	7.91862	0.0076178	merged_common_peaks	256.536	228.21
2	6305226	6307601	1202	-0.13721	8.11632	0.009216	merged_common_peaks	264.608	291.01
2	6329729	6345059	7672	0.0053	8.53287	0.0146407	merged_common_peaks	371.063	369.702
2	6348971	6353591	2258	0.07306	8.38898	0.0124163	merged_common_peaks	343.82	326.842
2	6371815	6373319	605	0.06251	7.49998	0.0191853	merged_common_peaks	184.981	177.137
2	6377316	6377765	208	0.22769	7.13182	0.0100844	merged_common_peaks	151.762	129.605
2	6379177	6380506	469	-0.03407	7.05848	0.0239859	merged_common_peaks	131.73	134.878
2	6412860	6415416	1197	0.0289	7.48316	0.0206057	merged_common_peaks	180.72	177.136
2	6420833	6427232	3202	-0.07357	8.73933	0.0105419	merged_common_peaks	416.608	438.403
2	6433331	6442831	4751	-0.1684	8.85438	0.00272295	merged_common_peaks	436.604	490.66
2	6445534	6450376	2419	-0.09835	8.59127	0.00926887	merged_common_peaks	372.758	399.055
2	6457408	6466456	4533	0.06093	8.79498	0.0109207	merged_common_peaks	453.653	434.892
2	6471862	6480309	4219	0.10538	8.45106	0.00930583	merged_common_peaks	362.981	337.413
2	6486849	6490425	1770	-0.14446	7.67784	0.0121014	merged_common_peaks	194.768	215.28
2	6496098	6499414	1193	0.12624	7.38612	0.0155813	merged_common_peaks	174.761	160.119
2	6507807	6511580	1864	0.05285	8.31257	0.0141228	merged_common_peaks	323.808	312.161
2	6514025	6517579	1767	-0.24512	7.80493	0.00376566	merged_common_peaks	205.411	243.451
2	6524722	6532980	4017	0.09955	8.71345	0.00834547	merged_common_peaks	434.504	405.533
2	6548512	6558144	4804	-0.09083	8.71515	0.00891961	merged_common_peaks	407.24	433.703
2	6559572	6560888	646	0.05594	7.46284	0.0197996	merged_common_peaks	179.87	173.029
2	6565354	6578127	6574	0.01512	8.00971	0.0174184	merged_common_peaks	259.083	256.382
2	6579431	6583543	2040	0.13773	7.86548	0.0104826	merged_common_peaks	244.611	222.339
2	6587881	6607882	11105	0.12976	7.93573	0.0110019	merged_common_peaks	256.108	234.079
2	6610969	6612038	721	-0.01341	7.04348	0.0243455	merged_common_peaks	131.305	132.531
2	6619706	6626567	3424	0.05022	8.52524	0.0131009	merged_common_peaks	374.897	362.071
2	6648030	6648901	410	-0.16642	7.33682	0.0134497	merged_common_peaks	152.6	171.258
2	6659213	6660089	424	0.34258	7.25319	0.00245176	merged_common_peaks	171.787	135.477
2	6661945	6663035	612	0.14504	7.42173	0.0141398	merged_common_peaks	180.299	163.054
2	6700544	6706730	3085	-0.01717	8.88978	0.0127776	merged_common_peaks	471.526	477.172
2	6715622	6729396	7216	0.11197	8.55848	0.00832093	merged_common_peaks	391.933	362.665
2	6730777	6732081	797	-0.01318	7.22354	0.0230138	merged_common_peaks	148.771	150.136
2	6736530	6740165	1958	0.08804	7.90032	0.0148629	merged_common_peaks	246.311	231.73
2	6747544	6748881	672	-0.04417	7.37305	0.0211016	merged_common_peaks	163.253	168.328
2	6751054	6752307	664	-0.22061	7.46872	0.00759277	merged_common_peaks	164.098	191.211
2	6753681	6755957	1248	-0.07238	7.54731	0.0180414	merged_common_peaks	182.42	191.805
2	6766391	6772505	3061	-0.04076	8.79201	0.0121758	merged_common_peaks	437.043	449.566
2	6778917	6786931	4014	0.01867	8.63916	0.0139073	merged_common_peaks	401.288	396.129
2	6822615	6823360	349	-0.29728	7.18999	0.00504359	merged_common_peaks	131.722	161.863
2	6827617	6828843	476	-0.19151	7.30436	0.0111862	merged_common_peaks	147.913	168.91
2	6837291	6848410	5582	0.05781	8.55225	0.0125306	merged_common_peaks	382.988	367.945
2	6859780	6860824	521	0.01256	7.17301	0.0234065	merged_common_peaks	144.938	143.681
2	6862777	6863992	654	-0.24269	7.76736	0.00398936	merged_common_peaks	200.299	236.994
2	6881390	6887771	3185	-0.0426	8.67741	0.0125713	merged_common_peaks	403.412	415.502
2	6892292	6893023	340	0.23372	6.96152	0.0113524	merged_common_peaks	135.146	114.934
2	6902699	6903703	522	0.11325	7.54907	0.0152626	merged_common_peaks	194.779	180.074
2	6909920	6914631	2328	-0.05022	8.68578	0.0123374	merged_common_peaks	404.689	419.024
2	6935758	6945952	5111	0.07549	8.03991	0.0144358	merged_common_peaks	270.157	256.384
2	6953325	6959651	2937	-0.08282	8.69751	0.00978827	merged_common_peaks	403.409	427.245
2	6963790	6967255	1740	-0.02699	7.40163	0.0213669	merged_common_peaks	167.514	170.677
2	6969136	6978772	4836	0.00925	8.36995	0.0154528	merged_common_peaks	331.893	329.772
2	6990186	6992585	1193	-0.01076	8.91239	0.0127397	merged_common_peaks	480.04	483.633
2	7005034	7019644	7297	-0.00792	8.56246	0.0144663	merged_common_peaks	377.021	379.096
2	7066718	7070866	2039	0.0518	8.25107	0.0146335	merged_common_peaks	310.182	299.242
2	7113015	7120028	3514	-0.00862	8.52819	0.0146406	merged_common_peaks	368.081	370.287
2	7155555	7156708	574	0.01825	7.56141	0.0203979	merged_common_peaks	190.089	187.7
2	7173054	7176910	1896	-0.0741	8.31794	0.0129219	merged_common_peaks	311.026	327.418
2	7190884	7191431	268	-0.37741	9.0113	1.9204e-06	merged_common_peaks	452.758	588.136
2	7202119	7204450	1086	0.06754	8.28421	0.0136471	merged_common_peaks	319.125	304.53
2	7205478	7206564	605	0.44234	7.29684	0.000595699	merged_common_peaks	183.293	134.893
2	7224225	7229191	2458	0.09874	8.79626	0.00806698	merged_common_peaks	460.045	429.612
2	7230478	7237910	3723	0.04395	8.98631	0.0110411	merged_common_peaks	514.949	499.498
2	7246953	7247387	209	-0.04298	6.87374	0.0255054	merged_common_peaks	115.54	119.034
2	7289329	7295492	3119	0.00487	8.4355	0.0151382	merged_common_peaks	346.794	345.625
2	7348204	7349530	809	0.1354	7.69903	0.0120984	merged_common_peaks	217.78	198.271
2	7351851	7353074	598	0.03468	7.44238	0.0208859	merged_common_peaks	176.035	171.854
2	7440713	7441102	192	-0.22972	7.22902	0.00956163	merged_common_peaks	138.54	162.453
2	7447218	7454242	3720	-0.09296	8.71017	0.00892102	merged_common_peaks	405.537	432.528
2	7536329	7538378	1017	0.25507	7.73739	0.00357328	merged_common_peaks	233.119	195.342
2	7581433	7584145	1357	0.05728	8.40932	0.0132432	merged_common_peaks	346.8	333.301
2	7657665	7659915	1150	0.15423	8.29381	0.00634573	merged_common_peaks	331.055	297.49
2	7777082	7783885	3411	-0.02697	8.84161	0.0126022	merged_common_peaks	454.496	463.073
2	7905954	7906712	325	0.176	6.85704	0.0171761	merged_common_peaks	123.216	109.065
2	7960186	7961090	421	0.13703	7.67833	0.0121014	merged_common_peaks	214.799	195.336
2	8016517	8019076	1240	0.11904	7.99061	0.0114688	merged_common_peaks	265.052	244.06
2	8035725	8036902	611	0.0537	7.67935	0.0182154	merged_common_peaks	208.832	201.202
2	8038933	8040480	752	-0.0643	7.47427	0.0193174	merged_common_peaks	173.901	181.827
2	8076102	8077834	817	0.04941	8.14115	0.0156177	merged_common_peaks	287.189	277.519
2	8198536	8200159	800	-0.0163	7.89131	0.018123	merged_common_peaks	236.085	238.767
2	8269793	8274592	2363	0.0153	8.48418	0.0147386	merged_common_peaks	359.994	356.197
2	8300403	8302088	810	-0.04054	8.13825	0.0158665	merged_common_peaks	277.815	285.732
2	8379555	8383411	1936	-0.00766	8.49394	0.014842	merged_common_peaks	359.565	361.479
2	8452444	8453687	593	-0.04498	7.04041	0.0238005	merged_common_peaks	129.6	133.704
2	8560713	8566850	3152	-0.00258	9.13401	0.0118968	merged_common_peaks	561.336	562.34
2	8568522	8569890	680	0.04737	8.05851	0.0160104	merged_common_peaks	271.009	262.255
2	8626023	8627191	539	0.14814	7.23495	0.0150314	merged_common_peaks	158.575	143.1
2	8815847	8823274	3223	-0.12172	8.94851	0.00542482	merged_common_peaks	473.641	515.336
2	8893680	8895141	698	-0.10111	7.46051	0.0173273	merged_common_peaks	170.066	182.413
2	8993922	8998118	2083	0.03786	8.81999	0.0122505	merged_common_peaks	457.91	446.05
2	9047862	9048499	299	0.19018	7.12606	0.0133782	merged_common_peaks	149.205	130.777
2	9057150	9059632	1240	0.14571	8.54943	0.00556586	merged_common_peaks	394.064	356.208
2	9121957	9125873	1949	0.14851	9.0705	0.00298604	merged_common_peaks	566.038	510.669
2	9187285	9195283	4046	-0.051	8.86573	0.0111856	merged_common_peaks	458.326	474.818
2	9300511	9301681	373	-0.02415	7.2124	0.0227828	merged_common_peaks	147.067	149.549
2	9311600	9313102	734	0.01315	7.92017	0.0180498	merged_common_peaks	243.326	241.118
2	9328797	9330769	989	-0.11105	7.80799	0.0136476	merged_common_peaks	215.638	232.892
2	9446603	9449263	1328	0.06037	8.44104	0.0128694	merged_common_peaks	354.889	340.345
2	9484562	9485491	522	-0.09593	7.24827	0.0194047	merged_common_peaks	147.064	157.176
2	9528922	9530189	621	0.12463	8.08419	0.0105217	merged_common_peaks	283.362	259.911
2	9594962	9595776	373	0.14035	7.06175	0.0177935	merged_common_peaks	140.257	127.255
2	9602350	9604208	988	-0.3684	7.22086	0.00207719	merged_common_peaks	131.294	169.49
2	9633491	9634849	705	0.1327	7.86296	0.0109989	merged_common_peaks	243.759	222.338
2	9651786	9656552	2375	0.06729	8.39899	0.0126957	merged_common_peaks	345.522	329.777
2	9762264	9763677	825	0.01669	7.33131	0.0220778	merged_common_peaks	161.978	160.115
2	9855043	9855927	423	0.01949	7.23989	0.0227866	merged_common_peaks	152.18	150.138
2	9896984	9897456	264	-0.25454	7.2678	0.00698695	merged_common_peaks	141.096	168.321
2	9922733	9923507	380	-0.16515	7.16989	0.0150795	merged_common_peaks	135.986	152.479
2	10001648	10009561	3975	0.10825	8.48968	0.00896358	merged_common_peaks	373.2	346.222
2	10085554	10093654	4053	0.08296	8.92201	0.00855185	merged_common_peaks	499.205	471.309
2	10255245	10255775	263	0.06535	7.00413	0.0232245	merged_common_peaks	131.307	125.492
2	10353054	10358210	2574	-0.05131	8.29266	0.0144631	merged_common_peaks	308.047	319.2
2	10368254	10370668	1091	-0.03877	7.30883	0.0215261	merged_common_peaks	156.438	160.699
2	10407213	10413494	3201	0.07656	8.10821	0.0142158	merged_common_peaks	283.36	268.714
2	10436165	10437312	569	0.2628	7.48065	0.00462667	merged_common_peaks	195.639	163.059
2	10592225	10608923	8336	-0.00571	8.79819	0.0133388	merged_common_peaks	444.283	446.045
2	10622693	10624082	841	-0.1727	7.27825	0.01267	merged_common_peaks	146.21	164.803
2	10639429	10642444	1563	-0.04265	7.63954	0.0191031	merged_common_peaks	196.477	202.372
2	10648892	10650268	640	0.02738	7.53405	0.0204492	merged_common_peaks	187.11	183.592
2	10873074	10880163	3637	0.02323	8.66267	0.0135882	merged_common_peaks	408.526	402.001
2	11161245	11162485	524	0.15171	7.34499	0.0141921	merged_common_peaks	171.355	154.251
2	11325226	11328955	1770	-0.23436	7.60104	0.00544216	merged_common_peaks	179.005	210.579
2	11386978	11387469	267	0.17845	6.7199	0.0184096	merged_common_peaks	112.138	99.0905
2	11714072	11715711	802	-0.02132	7.87812	0.0181982	merged_common_peaks	233.529	237.006
2	11767750	11769519	927	-0.01254	8.25522	0.0160147	merged_common_peaks	304.216	306.871
2	11867292	11868233	463	0.09141	7.55683	0.0169852	merged_common_peaks	194.353	182.421
2	11983128	11983772	317	0.03282	6.7138	0.0272375	merged_common_peaks	106.168	103.78
2	12331739	12332828	532	-0.14131	7.6636	0.0121027	merged_common_peaks	193.065	212.933
2	12449459	12454436	2444	0.0479	8.41223	0.0139846	merged_common_peaks	346.372	335.061
2	12539084	12541637	1437	-0.02737	7.86793	0.0179647	merged_common_peaks	231.4	235.832
2	12554164	12555437	640	0.14738	7.48391	0.0134155	merged_common_peaks	188.393	170.098
2	12566124	12578481	6199	0.16977	8.88599	0.00247973	merged_common_peaks	501.767	446.063
2	12656874	12660458	1762	0.08087	8.32115	0.0122427	merged_common_peaks	328.918	310.988
2	12734655	12736906	1068	0.01211	7.98489	0.0176566	merged_common_peaks	254.398	252.272
2	12739480	12740200	362	0.19018	7.12606	0.0133782	merged_common_peaks	149.205	130.777
2	12754261	12755349	605	0.06681	7.35109	0.020458	merged_common_peaks	167.092	159.53
2	12811791	12812970	600	0.05698	7.80976	0.0171971	merged_common_peaks	228.849	219.986
2	13093282	13094722	708	-0.03585	7.70036	0.0187221	merged_common_peaks	205.42	210.589
2	13223084	13227071	1996	-0.10807	9.27682	0.0046519	merged_common_peaks	597.496	643.972
2	13299740	13300579	431	0.0689	7.25896	0.0210106	merged_common_peaks	156.868	149.553
2	13336555	13337280	335	0.28729	6.98833	0.00734897	merged_common_peaks	140.261	114.936
2	13421936	13426673	2372	-0.07858	8.60751	0.010764	merged_common_peaks	379.569	400.817
2	14089325	14093446	2048	-0.22205	7.26888	0.00895992	merged_common_peaks	142.8	166.561
2	14402285	14405865	1794	0.01575	8.33679	0.0155695	merged_common_peaks	325.083	321.553
2	14408029	14412415	2247	0.06181	9.0664	0.00951798	merged_common_peaks	547.724	524.753
2	14417508	14418105	281	-0.01227	7.1248	0.0238201	merged_common_peaks	138.973	140.16
2	14457738	14458284	287	0.04877	7.08097	0.0231241	merged_common_peaks	137.697	133.12
2	14596805	14597535	351	-0.08635	7.48175	0.0178183	merged_common_peaks	173.474	184.174
2	14859091	14860823	846	0.11929	8.13588	0.0105132	merged_common_peaks	293.156	269.891
2	14952022	14952809	378	0.22398	7.21248	0.00951286	merged_common_peaks	160.282	137.234
2	15389797	15391069	659	-0.24816	7.59414	0.00457183	merged_common_peaks	177.301	210.579
2	15567016	15567903	479	0.27946	7.13799	0.00655235	merged_common_peaks	155.172	127.846
2	15595341	15597185	875	-0.01954	8.00552	0.0173169	merged_common_peaks	255.247	258.728
2	15653859	15655855	1367	-0.2042	7.24699	0.0110972	merged_common_peaks	141.523	163.041
2	15680045	15681971	941	-0.04443	7.91574	0.0172475	merged_common_peaks	237.787	245.224
2	16003675	16006174	1238	0.04496	8.37232	0.014139	merged_common_peaks	336.579	326.251
2	16008005	16010489	1239	0.0408	8.29564	0.0149105	merged_common_peaks	318.697	309.81
2	16150653	16151172	262	0.01415	6.86632	0.0260518	merged_common_peaks	117.246	116.102
2	16189649	16192097	1334	-0.25448	7.20091	0.00741342	merged_common_peaks	134.706	160.692
2	16834379	16835401	495	-0.06103	7.44769	0.0198968	merged_common_peaks	170.92	178.305
2	16972641	16973678	512	0.14796	7.70958	0.0115198	merged_common_peaks	220.336	198.859
2	17092790	17095374	1279	0.11643	8.48395	0.00829055	merged_common_peaks	372.776	343.874
2	17337565	17344836	3632	0.02191	9.17756	0.0114017	merged_common_peaks	583.47	574.676
2	17362869	17363663	388	0.21974	7.06099	0.0115677	merged_common_peaks	144.093	123.736
2	17418088	17419217	555	-0.1826	7.74651	0.00825554	merged_common_peaks	201.58	228.779
2	17487834	17488730	554	0.17026	7.21612	0.0134274	merged_common_peaks	157.723	140.166
2	18496907	18498558	890	-0.04189	7.92733	0.0171838	merged_common_peaks	239.916	246.984
2	18651354	18655528	2084	-0.085	9.14312	0.00733085	merged_common_peaks	548.984	582.3
2	18971918	18972646	372	0.0014	7.16153	0.0235693	merged_common_peaks	143.234	143.095
2	19322777	19323416	300	0.23693	6.79125	0.0129243	merged_common_peaks	120.235	102.025
2	19528139	19528495	187	0.19275	6.52571	0.0185899	merged_common_peaks	98.5023	86.1832
5	28664	29803	588	-0.17902	7.7108	0.00871229	merged_common_peaks	196.896	222.909
5	47696	49031	480	-0.20686	7.23523	0.0103129	merged_common_peaks	140.244	161.866
5	64633	71280	3340	0.00941	8.77115	0.013429	merged_common_peaks	438.324	435.475
5	135674	139855	2040	0.01142	8.77992	0.0133835	merged_common_peaks	441.304	437.825
5	250511	250985	265	0.07735	6.70309	0.0253483	merged_common_peaks	107.022	101.435
5	354715	356739	972	0.15009	8.26588	0.00700479	merged_common_peaks	324.242	292.205
5	393680	394452	448	0.05818	6.94554	0.0241119	merged_common_peaks	125.769	120.798
5	610416	611620	620	0.12777	7.8297	0.0120522	merged_common_peaks	237.797	217.642
5	724947	726243	667	0.01853	7.85821	0.0183129	merged_common_peaks	233.532	230.551
5	744088	744795	361	0.15869	6.93864	0.0170844	merged_common_peaks	129.606	116.106
5	1064537	1069567	2244	0.14585	8.17406	0.00802396	merged_common_peaks	303.801	274.59
5	1115428	1116186	318	0.18954	6.99718	0.015133	merged_common_peaks	136.424	119.628
5	1559824	1560408	294	-0.12771	7.2431	0.0173411	merged_common_peaks	144.933	158.348
5	1817147	1817811	324	-0.18137	7.15062	0.0133919	merged_common_peaks	133.43	151.304
5	2040000	2041023	594	-0.02725	7.33032	0.0219407	merged_common_peaks	159.421	162.46
5	2106198	2107673	669	-0.13093	7.53556	0.0140338	merged_common_peaks	177.306	194.15
5	2257438	2262862	2695	-0.06616	9.11569	0.00883107	merged_common_peaks	542.173	567.615
5	2346625	2348537	976	-0.41553	7.69157	0.000261778	merged_common_peaks	178.999	238.746
5	2374364	2377887	1611	0.03754	8.62053	0.0131656	merged_common_peaks	398.739	388.497
5	2392068	2396250	2061	0.06509	9.17688	0.00875584	merged_common_peaks	591.988	565.873
5	2417493	2419273	1083	-0.13072	7.21461	0.0174173	merged_common_peaks	141.951	155.414
5	2441429	2443496	1053	0.05814	8.38927	0.0135761	merged_common_peaks	342.116	328.603
5	2957241	2957631	209	-0.09072	6.82112	0.0237544	merged_common_peaks	109.574	116.685
5	3019042	3019424	169	0.18844	6.61857	0.0185204	merged_common_peaks	104.894	92.0503
5	3248413	3249860	643	-0.01134	7.72065	0.0193172	merged_common_peaks	210.107	211.765
5	3372234	3372998	374	-0.10347	7.5493	0.0164431	merged_common_peaks	180.714	194.151
5	3903456	3910742	3687	-0.06316	8.94622	0.0101557	merged_common_peaks	482.585	504.182
5	4208050	4213528	2735	-0.04361	9.10895	0.010529	merged_common_peaks	543.88	560.572
5	4313218	4314227	357	-0.07811	6.89129	0.0239582	merged_common_peaks	115.539	121.967
5	4320105	4326166	3037	0.05585	8.89943	0.0106854	merged_common_peaks	486.857	468.37
5	4491040	4493986	1321	-0.09593	7.24827	0.0194047	merged_common_peaks	147.064	157.176
5	4987699	4988797	534	0.00309	7.58507	0.0203452	merged_common_peaks	192.22	191.809
5	5097362	5098505	447	-0.08068	7.31397	0.0196654	merged_common_peaks	154.732	163.632
5	5111404	5114702	1631	0.01329	8.60621	0.0142068	merged_common_peaks	391.496	387.906
5	5217429	5221296	1916	0.00497	8.69713	0.01381	merged_common_peaks	415.762	414.332
5	5383255	5384506	570	-0.08089	7.82672	0.0159739	merged_common_peaks	220.751	233.482
5	5629902	5635496	2743	-0.14892	8.09877	0.00792017	merged_common_peaks	260.35	288.661
5	5643856	5646624	1383	-0.02046	8.90051	0.012659	merged_common_peaks	474.505	481.282
5	5969756	5970424	335	-0.02662	7.18834	0.0231677	merged_common_peaks	144.51	147.202
5	6205865	6212559	3356	-0.00218	9.07578	0.0121366	merged_common_peaks	539.205	540.02
5	6323901	6325202	693	0.0643	7.89209	0.0161113	merged_common_peaks	242.904	232.315
5	6349030	6351593	1284	0.11608	8.61778	0.00742067	merged_common_peaks	408.961	377.345
5	6403304	6407888	2338	0.0388	8.93543	0.0116939	merged_common_peaks	496.218	483.05
5	6433688	6439443	2849	0.05973	8.85915	0.0107768	merged_common_peaks	474.089	454.862
5	6618519	6620508	924	-0.2549	7.30241	0.00710624	merged_common_peaks	144.503	172.429
5	6630713	6635601	2427	0.02723	8.56432	0.014034	merged_common_peaks	382.134	374.989
5	6914144	6915729	764	0.09131	8.14985	0.0125857	merged_common_peaks	293.152	275.173
5	6982390	6983295	426	0.02413	7.48555	0.0207793	merged_common_peaks	180.72	177.723
5	7027702	7039201	5736	0.20572	8.80166	0.00145274	merged_common_peaks	479.212	415.527
5	7041486	7042944	738	-0.01622	8.20568	0.0162791	merged_common_peaks	293.572	296.891
5	7056177	7058161	990	0.20305	8.11689	0.00431921	merged_common_peaks	297.844	258.741
5	7412875	7415958	1580	0.09454	8.41005	0.0107186	merged_common_peaks	351.485	329.191
5	7504239	7507313	1528	-0.0069	8.17569	0.0165294	merged_common_peaks	288.463	289.845
5	7711992	7712770	399	0.13342	7.10412	0.0176944	merged_common_peaks	144.09	131.363
5	7777263	7777868	308	-0.11773	6.90576	0.0209037	merged_common_peaks	115.112	124.9
5	8206857	8210009	1580	-0.05631	7.79482	0.0176093	merged_common_peaks	217.771	226.438
5	8252821	8253956	562	-0.09104	7.22901	0.0194909	merged_common_peaks	145.36	154.829
5	8258188	8259949	1163	-0.23029	7.20244	0.00877618	merged_common_peaks	135.984	159.519
5	8313128	8314050	464	0.06545	7.49185	0.019229	merged_common_peaks	184.129	175.963
5	8364417	8364909	252	-0.19239	7.12822	0.0125309	merged_common_peaks	130.873	149.543
5	8400179	8401106	530	-0.19504	7.37112	0.0105724	merged_common_peaks	154.729	177.127
5	8503250	8506290	1471	0.1227	7.48642	0.0153923	merged_common_peaks	187.114	171.858
5	8549526	8551258	880	-0.0754	8.74612	0.0100046	merged_common_peaks	418.307	440.751
5	8571775	8577744	3009	0.01344	8.98958	0.0123541	merged_common_peaks	510.689	505.953
5	8622784	8630009	3465	-0.02237	8.8621	0.0127322	merged_common_peaks	461.733	468.948
5	8666661	8667185	286	-0.09551	7.08918	0.0208078	merged_common_peaks	131.729	140.745
5	8683753	8684827	520	0.05453	7.43246	0.0203483	merged_common_peaks	176.036	169.506
5	8715578	8723631	4091	0.04292	9.0521	0.0108505	merged_common_peaks	538.783	522.99
5	8828229	8829496	747	-0.00289	7.37854	0.0218128	merged_common_peaks	166.237	166.57
5	8927892	8934330	3239	0.08674	8.84824	0.0085892	merged_common_peaks	474.943	447.229
5	9016050	9017040	439	-0.29567	7.13208	0.00592722	merged_common_peaks	126.61	155.408
5	9020499	9022611	1039	-0.04154	7.62326	0.0191909	merged_common_peaks	194.347	200.024
5	9048774	9049410	302	-0.11984	6.86345	0.0219574	merged_common_peaks	111.703	121.379
5	9061680	9063233	763	-0.20289	7.41422	0.00930309	merged_common_peaks	158.988	182.996
5	9069291	9070706	693	0.0604	8.35913	0.0136832	merged_common_peaks	335.305	321.557
5	9091402	9094814	1722	-0.07242	8.26071	0.0130692	merged_common_peaks	299.103	314.501
5	9181698	9189247	3797	-0.01287	9.25573	0.0112895	merged_common_peaks	608.577	614.03
5	9211604	9218681	3534	-0.09534	8.04099	0.0132106	merged_common_peaks	254.817	272.226
5	9249057	9253771	2421	-0.08276	8.58841	0.0105	merged_common_peaks	374.035	396.119
5	9272005	9275749	1978	0.00982	8.20724	0.0163343	merged_common_peaks	296.554	294.542
5	9323304	9324746	583	0.15998	7.30453	0.0142102	merged_common_peaks	167.094	149.556
5	9343662	9347254	2402	-0.04396	7.27965	0.021716	merged_common_peaks	153.03	157.765
5	9348041	9348910	524	-0.15944	7.25896	0.0142276	merged_common_peaks	144.933	161.869
5	9380889	9386655	2870	0.09649	8.14936	0.012179	merged_common_peaks	293.579	274.586
5	9393195	9394301	569	-0.02708	7.71677	0.0190886	merged_common_peaks	208.403	212.351
5	9411013	9417627	3307	-0.0192	8.88164	0.0127361	merged_common_peaks	468.544	474.821
5	9460380	9463209	1592	0.07567	7.64763	0.0171277	merged_common_peaks	205.852	195.333
5	9561225	9571495	5070	-0.17628	8.65471	0.00317455	merged_common_peaks	379.136	428.41
5	9579935	9581909	979	-0.29373	7.24315	0.00473456	merged_common_peaks	136.834	167.732
5	9635836	9637241	714	-0.05457	7.96157	0.0164612	merged_common_peaks	244.601	254.03
5	9640849	9644506	1822	-0.08793	8.83651	0.0085947	merged_common_peaks	443.425	471.291
5	9698624	9702416	1886	-0.03469	8.14414	0.0162376	merged_common_peaks	279.518	286.32
5	9707977	9712618	2331	0.00863	8.46169	0.0149243	merged_common_peaks	353.607	351.499
5	9738554	9741757	1516	0.04259	7.90293	0.017312	merged_common_peaks	242.901	235.835
5	9751079	9753645	1384	-0.05828	8.13824	0.0150964	merged_common_peaks	276.11	287.492
5	9755432	9758468	1321	-0.06024	7.77403	0.0170003	merged_common_peaks	214.363	223.503
5	9760549	9762060	720	0.12129	7.80687	0.0125978	merged_common_peaks	233.538	214.707
5	9778030	9779211	690	-0.17321	7.16029	0.0142418	merged_common_peaks	134.707	151.891
5	9811781	9812397	326	-0.033	7.10837	0.0233087	merged_common_peaks	136.416	139.572
5	9840643	9844942	2092	-0.04073	8.1733	0.0156948	merged_common_peaks	284.628	292.778
5	9889717	9898046	4211	0.00123	9.07748	0.0121366	merged_common_peaks	540.479	540.018
5	9904703	9909946	2667	0.0581	8.44736	0.01312	merged_common_peaks	356.167	342.108
5	9920851	9931792	5479	-0.02847	8.97028	0.0119764	merged_common_peaks	496.636	506.534
5	9937080	9940254	1840	-0.18382	7.56891	0.00959909	merged_common_peaks	178.156	202.366
5	9948450	9957421	4499	0.01147	9.05408	0.0120904	merged_common_peaks	533.674	529.448
5	9978768	9983691	2542	-0.04072	8.78636	0.0121981	merged_common_peaks	435.34	447.803
5	9991535	9992881	717	-0.1173	7.79392	0.0131471	merged_common_peaks	213.083	231.131
5	9995627	10003252	3658	-0.01068	8.58326	0.0143161	merged_common_peaks	382.13	384.969
5	10049695	10065818	7841	0.04942	7.89191	0.0168028	merged_common_peaks	241.624	233.487
5	10067673	10068678	491	-0.02357	7.41815	0.0214312	merged_common_peaks	169.644	172.438
5	10071802	10075826	2026	0.08026	8.12574	0.013796	merged_common_peaks	287.192	271.651
5	10077893	10089261	4293	-0.00805	7.94083	0.0179766	merged_common_peaks	245.028	246.399
5	10094366	10118809	12114	-0.0824	8.71545	0.00976639	merged_common_peaks	408.516	432.528
5	10123696	10127644	1971	-0.01435	8.05957	0.0171271	merged_common_peaks	265.468	268.122
5	10139526	10148726	4529	0.07904	8.00827	0.0145225	merged_common_peaks	264.622	250.514
5	10152631	10161002	4196	0.0619	8.86581	0.010537	merged_common_peaks	476.641	456.623
5	10168100	10173947	2904	0.00241	7.90775	0.0181997	merged_common_peaks	240.344	239.943
5	10179331	10183131	1861	-0.02611	7.8432	0.0182708	merged_common_peaks	227.567	231.723
5	10193794	10205934	6061	-0.09704	8.46321	0.00998638	merged_common_peaks	341.251	364.994
5	10216232	10238010	10879	0.04824	8.00967	0.0162445	merged_common_peaks	262.067	253.449
5	10240178	10261599	10737	0.0333	9.04891	0.0114468	merged_common_peaks	535.803	523.578
5	10266746	10268112	747	0.01454	7.35123	0.0219438	merged_common_peaks	164.108	162.462
5	10290820	10291527	347	-0.02036	7.30747	0.0220746	merged_common_peaks	157.291	159.526
5	10307534	10313989	3280	-0.0888	8.3054	0.0119227	merged_common_peaks	306.767	326.242
5	10350579	10356399	2922	0.06695	8.77838	0.0107205	merged_common_peaks	449.4	429.021
5	10358746	10368205	4725	-0.05879	8.44949	0.0131065	merged_common_peaks	342.532	356.779
5	10372978	10374267	604	0.20707	7.75609	0.00632675	merged_common_peaks	232.265	201.21
5	10378770	10383387	2357	-0.16721	7.92178	0.00808352	merged_common_peaks	228.837	256.957
5	10386483	10389637	1450	-0.14533	7.6496	0.0121034	merged_common_peaks	190.935	211.171
5	10392684	10393536	412	-0.02686	7.20537	0.0228575	merged_common_peaks	146.214	148.962
5	10397014	10420564	11744	-0.06537	8.16386	0.0143782	merged_common_peaks	280.367	293.363
5	10422533	10427014	2308	-0.06807	7.61421	0.0177309	merged_common_peaks	191.364	200.609
5	10431355	10449174	8550	0.14114	8.48145	0.00633784	merged_common_peaks	375.331	340.351
5	10461906	10476736	6840	0.06441	8.20257	0.0142385	merged_common_peaks	301.241	288.088
5	10491944	10493061	431	-0.09583	7.21011	0.0195781	merged_common_peaks	143.231	153.068
5	10497059	10523721	15753	-0.09878	8.03303	0.0127938	merged_common_peaks	253.113	271.051
5	10546633	10562447	5963	-0.09008	8.90389	0.00805922	merged_common_peaks	464.28	494.193
5	10564235	10568047	1859	-0.03164	7.48595	0.0206057	merged_common_peaks	177.31	181.242
5	10570597	10609194	19266	-0.06553	8.92302	0.00974985	merged_common_peaks	474.497	496.546
5	10611931	10613471	706	-0.03954	7.81438	0.0180605	merged_common_peaks	222.03	228.199
5	10618296	10631130	6373	-0.10384	8.25572	0.010861	merged_common_peaks	294.842	316.846
5	10633324	10635197	963	0.11183	7.95187	0.0124539	merged_common_peaks	257.385	238.188
5	10644249	10647265	1509	-0.10625	7.98487	0.0124121	merged_common_peaks	244.17	262.832
5	10660892	10672936	5783	0.08346	7.66448	0.0165783	merged_common_peaks	208.834	197.095
5	10682974	10688083	2542	-0.08324	7.95055	0.0142846	merged_common_peaks	240.34	254.614
5	10689470	10702612	5332	-0.12134	8.10374	0.0105191	merged_common_peaks	263.758	286.901
5	10706532	10714050	3665	-0.14809	8.69623	0.00455183	merged_common_peaks	394.036	436.632
5	10721184	10754709	17272	0.09894	8.41483	0.010365	merged_common_peaks	353.19	329.78
5	10755825	10762792	3495	-0.07565	8.07858	0.0139301	merged_common_peaks	263.335	277.512
5	10764256	10772432	4099	-0.00559	9.11125	0.0119715	merged_common_peaks	551.973	554.116
5	10776126	10779957	1944	-0.10624	8.33004	0.0100539	merged_common_peaks	310.171	333.874
5	10786026	10795845	4850	0.03714	8.19773	0.0157874	merged_common_peaks	297.408	289.849
5	10801746	10802938	656	0.01334	7.599	0.0201364	merged_common_peaks	194.776	192.983
5	10806594	10820585	7369	0.08307	8.15187	0.0129733	merged_common_peaks	292.726	276.347
5	10821780	10828557	3738	0.05068	8.34369	0.014004	merged_common_peaks	330.62	319.207
5	10829970	10835443	2829	0.17538	7.4829	0.0107331	merged_common_peaks	190.097	168.337
5	10837824	10855056	8617	0.05323	8.24042	0.0146721	merged_common_peaks	308.053	296.894
5	10869330	10873248	1968	0.05184	8.16958	0.0152361	merged_common_peaks	293.151	282.804
5	10882603	10915694	12728	-0.01059	7.65139	0.0197866	merged_common_peaks	200.311	201.786
5	10922638	10923668	633	-0.00991	7.45415	0.0212486	merged_common_peaks	174.756	175.96
5	10937778	10939555	885	-0.06019	7.88698	0.0164844	merged_common_peaks	231.824	241.7
5	10945146	10995724	48724	0.13324	7.12958	0.0176194	merged_common_peaks	146.647	133.71
5	11001051	11018796	8853	0.07321	8.03878	0.0144358	merged_common_peaks	269.732	256.386
5	11026268	11028418	1129	-0.17839	7.37466	0.011284	merged_common_peaks	156.007	176.54
5	11031157	11182757	75654	0.0756	8.5191	0.0112131	merged_common_peaks	376.603	357.376
5	11184436	11188934	2251	-0.46122	10.8475	2.199e-23	merged_common_peaks	1570.32	2161.86
5	11192208	11276449	42012	0.14337	7.90961	0.0100022	merged_common_peaks	252.702	228.797
5	11278326	11282007	1883	0.01912	7.38955	0.0216192	merged_common_peaks	168.793	166.571
5	11284950	11377992	51749	-0.09073	8.70146	0.00892515	merged_common_peaks	403.408	429.592
5	11387400	11610772	111970	-0.0135	8.05683	0.0171271	merged_common_peaks	265.043	267.534
5	11621701	11699679	43321	0.00555	8.5261	0.0146803	merged_common_peaks	369.358	367.94
5	11701273	12076158	197137	0.0244	8.68002	0.0135102	merged_common_peaks	413.637	406.7
5	12092160	12260249	84052	0.00296	8.50393	0.014801	merged_common_peaks	363.399	362.654
5	12262234	12302056	24054	-0.03626	8.39269	0.0146694	merged_common_peaks	331.89	340.337
5	12308286	12394329	43043	-0.09865	8.73257	0.00834512	merged_common_peaks	411.071	440.163
5	12395685	12418909	11632	-0.06943	8.79079	0.0101993	merged_common_peaks	432.356	453.672
5	12420992	12448223	13630	0.04826	8.61054	0.012809	merged_common_peaks	397.461	384.385
5	12451557	12496273	22223	-0.05892	8.88302	0.0107203	merged_common_peaks	462.58	481.863
5	12497725	12508757	5564	0.00156	8.90623	0.0128725	merged_common_peaks	480.04	479.521
5	12510057	12537205	13566	0.03589	8.77464	0.0127284	merged_common_peaks	443.437	432.542
5	12538369	12547015	4354	0.05857	8.49629	0.012697	merged_common_peaks	368.514	353.853
5	12569039	12583776	7370	-0.05772	8.52407	0.0126131	merged_common_peaks	360.839	375.568
5	12601040	12601642	289	-0.07422	7.23742	0.0206384	merged_common_peaks	147.065	154.829
5	12607342	12616156	4350	0.10554	8.8746	0.00703739	merged_common_peaks	486.862	452.518
5	12620639	12651213	15299	0.01548	8.60512	0.0141521	merged_common_peaks	391.498	387.319
5	12652744	12660037	3641	-0.05396	8.29398	0.0141919	merged_common_peaks	308.046	319.785
5	12662084	12662883	446	-0.01923	7.44467	0.0212481	merged_common_peaks	173.051	175.373
5	12664456	12678953	7134	-0.01191	8.23048	0.0161453	merged_common_peaks	299.108	301.588
5	12684288	12803017	59561	0.11197	8.42903	0.00930775	merged_common_peaks	358.298	331.541
5	12804572	12827292	11548	0.14695	7.84318	0.00995077	merged_common_peaks	241.63	218.23
5	12838078	12844278	2809	-0.07549	7.50091	0.018257	merged_common_peaks	176.456	185.935
5	12847350	12879257	15075	-0.07346	7.72512	0.0168077	merged_common_peaks	206.27	217.045
5	12880475	12960073	3538	-0.07624	8.34251	0.0125332	merged_common_peaks	316.133	333.289
5	12961799	12963550	860	-0.20647	7.31183	0.00975875	merged_common_peaks	147.912	170.67
5	12965351	13049753	42358	0.063	8.26515	0.014019	merged_common_peaks	314.442	301.006
5	13052001	13067820	8554	-0.28437	7.45879	0.00375025	merged_common_peaks	159.411	194.143
5	13069063	13076831	3882	-0.02722	8.85786	0.0126491	merged_common_peaks	459.605	468.359
5	13085932	13098088	5120	-0.10566	8.24408	0.010872	merged_common_peaks	292.289	314.499
5	13112015	13139856	13969	-0.16144	8.88014	0.0031021	merged_common_peaks	445.543	498.296
5	13141117	13196124	27302	0.09992	8.42301	0.0103581	merged_common_peaks	355.319	331.543
5	13205118	13220047	7433	0.00166	8.09263	0.0170653	merged_common_peaks	273.133	272.819
5	13225081	13229885	1705	-0.00185	7.9846	0.0177264	merged_common_peaks	253.12	253.444
5	13243113	13340813	51143	-0.08347	8.36159	0.0118172	merged_common_peaks	319.541	338.573
5	13344580	13353265	5055	0.0281	8.35868	0.0151494	merged_common_peaks	331.469	325.075
5	13369325	13385437	8073	-0.10565	9.04426	0.00597757	merged_common_peaks	508.969	547.64
5	13386800	13392403	3021	-0.10817	7.48911	0.0160151	merged_common_peaks	173.048	186.521
5	13394190	13413791	9799	0.09309	8.77756	0.00861644	merged_common_peaks	453.232	424.91
5	13437399	13461842	12231	0.21217	7.67191	0.00656229	merged_common_peaks	219.488	189.47
5	13471905	13472702	379	0.03013	7.36942	0.0216163	merged_common_peaks	167.09	163.637
5	13489653	13492025	1197	-0.04995	8.32743	0.0143164	merged_common_peaks	315.71	326.832
5	13493821	13498531	2607	-0.02399	8.02925	0.0171879	merged_common_peaks	259.08	263.424
5	13501129	13505813	2345	-0.06526	7.66948	0.017895	merged_common_peaks	199.031	208.241
5	13507202	13508339	503	-0.06279	7.39361	0.0201972	merged_common_peaks	164.531	171.85
5	13511203	13512858	669	0.07925	7.15235	0.0211397	merged_common_peaks	146.218	138.402
5	13517890	13519842	957	0.03964	7.89426	0.0175991	merged_common_peaks	241.199	234.662
5	13526318	13544442	9068	0.01808	8.21138	0.0162521	merged_common_peaks	298.259	294.544
5	13549901	13551579	993	0.12478	7.16285	0.0175438	merged_common_peaks	149.628	137.231
5	13554230	13556463	1248	-0.12808	7.28508	0.0164992	merged_common_peaks	149.193	163.044
5	13563002	13579067	8116	-0.1677	7.89493	0.00851285	merged_common_peaks	224.579	252.262
5	13626443	13627643	530	-0.05413	7.39301	0.0206167	merged_common_peaks	164.957	171.264
5	13636601	13652903	8680	-0.11307	8.48733	0.00862698	merged_common_peaks	345.082	373.215
5	13656438	13657839	714	0.03389	7.77492	0.018286	merged_common_peaks	221.608	216.463
5	13659161	13660410	633	-0.03198	7.79949	0.0183787	merged_common_peaks	220.327	225.265
5	13680829	13688209	3662	-0.21454	7.54935	0.0072617	merged_common_peaks	173.896	201.777
5	13689888	13698571	4299	-0.05028	8.03526	0.0161132	merged_common_peaks	257.802	266.945
5	13713214	13719342	3045	-0.0649	9.01907	0.00938241	merged_common_peaks	507.274	530.614
5	13734883	13740991	3061	-0.04454	8.24472	0.0151428	merged_common_peaks	298.679	308.043
5	13755242	13759253	1906	0.09712	8.30178	0.0111989	merged_common_peaks	326.364	305.117
5	13777262	13801343	10796	0.04685	8.49042	0.01345	merged_common_peaks	365.53	353.85
5	13802990	13803956	500	0.07486	7.37619	0.0198736	merged_common_peaks	170.499	161.878
5	13809448	13813450	1662	-0.00289	7.41864	0.0215566	merged_common_peaks	170.922	171.265
5	13815910	13818375	1234	-0.0079	7.99489	0.0175878	merged_common_peaks	254.397	255.794
5	13819617	13823718	2557	-0.10299	8.00571	0.0128403	merged_common_peaks	248.003	266.355
5	13835253	13852175	8414	0.00437	8.64478	0.0140828	merged_common_peaks	400.863	399.65
5	13877551	13878368	433	-0.08115	7.34952	0.0194838	merged_common_peaks	158.567	167.741
5	13883924	13890887	3473	0.00724	8.77783	0.0134292	merged_common_peaks	440.028	437.825
5	13906166	13907402	503	-0.16475	7.4333	0.0120394	merged_common_peaks	163.248	182.997
5	13917552	13918055	250	0.18911	6.46373	0.0213111	merged_common_peaks	94.2411	82.6633
5	13925949	13934320	4188	-0.14226	8.70882	0.00481299	merged_common_peaks	398.294	439.57
5	13942117	13947802	2906	-0.05965	8.33033	0.0134992	merged_common_peaks	315.283	328.592
5	13960628	13970080	4731	0.0577	8.61967	0.0123248	merged_common_peaks	401.295	385.562
5	13972134	13973116	384	-0.03	7.23195	0.0226357	merged_common_peaks	148.771	151.897
5	13974967	13976510	738	-0.01376	7.7393	0.0191827	merged_common_peaks	212.662	214.7
5	13978330	13981261	1457	0.05928	7.94676	0.0162164	merged_common_peaks	251.846	241.708
5	13982566	13984047	767	0.18003	7.49025	0.0107435	merged_common_peaks	191.376	168.925
5	13989140	13991530	939	-0.00059	7.81143	0.0187959	merged_common_peaks	224.588	224.68
5	13993356	14000686	3647	0.02569	8.90944	0.0124388	merged_common_peaks	485.149	476.587
5	14013044	14016173	1471	-0.08745	7.75282	0.0157928	merged_common_peaks	209.252	222.328
5	14025837	14026854	527	0.04717	7.31987	0.0214639	merged_common_peaks	162.405	157.181
5	14035966	14040099	2059	0.10716	8.37194	0.00967271	merged_common_peaks	343.822	319.21
5	14042889	14045573	1205	-0.09052	7.41862	0.0180532	merged_common_peaks	165.807	176.544
5	14050492	14052804	1155	-0.12599	7.64315	0.0133076	merged_common_peaks	191.361	208.824
5	14055521	14057264	866	0.15772	7.59464	0.0114774	merged_common_peaks	204.152	183.01
5	14059086	14060104	485	0.06176	7.31636	0.0206738	merged_common_peaks	162.832	156.008
5	14075716	14078111	1225	-0.03484	8.23576	0.0155939	merged_common_peaks	297.829	305.109
5	14081868	14089470	4086	-0.04922	8.58147	0.0128999	merged_common_peaks	376.592	389.662
5	14098930	14100425	759	-0.07504	7.69277	0.0173707	merged_common_peaks	201.586	212.348
5	14113257	14118241	2490	-0.1663	8.18105	0.00648793	merged_common_peaks	273.975	307.448
5	14143859	14150472	3012	0.00722	8.62485	0.0141534	merged_common_peaks	395.754	393.778
5	14155623	14182767	13631	0.05324	8.01884	0.0161916	merged_common_peaks	264.195	254.623
5	14184663	14185762	521	-0.0276	7.4453	0.021067	merged_common_peaks	172.625	175.96
5	14203168	14209658	3267	0.04338	8.77642	0.0122317	merged_common_peaks	445.138	431.953
5	14256454	14264750	4135	0.12432	8.61966	0.00682745	merged_common_peaks	410.666	376.759
5	14268455	14272944	2185	0.14537	8.37237	0.00648666	merged_common_peaks	348.51	315.104
5	14294808	14298455	1805	-0.05602	8.52492	0.0126131	merged_common_peaks	361.264	375.568
5	14309521	14312291	1467	-0.02554	7.74519	0.0190495	merged_common_peaks	212.662	216.46
5	14314299	14317545	2363	-0.08273	7.38855	0.0193068	merged_common_peaks	162.826	172.436
5	14319510	14325070	2588	-0.04875	7.8997	0.017059	merged_common_peaks	234.806	242.876
5	14326893	14329995	1959	0.03678	7.2027	0.022625	merged_common_peaks	149.199	145.443
5	14331102	14336508	2659	0.2492	7.21892	0.00812452	merged_common_peaks	162.413	136.648
5	14337788	14338220	236	0.02982	7.09044	0.02373	merged_common_peaks	137.697	134.88
5	14339494	14341074	777	-0.02119	7.28027	0.0222801	merged_common_peaks	154.309	156.592
5	14351085	14354279	1290	-0.02458	7.14853	0.0234866	merged_common_peaks	140.677	143.094
[truncated: 948 more rows]

## Sheet: WT vs rdr6 R2
chr	start	end	summit	M_value	A_value	P_value	Peak_Group	normalized_read_density_in_H3K9me2_WT_R2	normalized_read_density_in_H3K9me2_rdr6_R2
1	634165	634428	132	0.36364	6.80187	0.004112	k9me2_wt_r2_peaks_unique	126.561	98.3634
1	2415443	2415755	156	0.16529	7.18979	0.0142408	k9me2_wt_r2_peaks_unique	154.604	137.868
1	4770304	4770539	118	0.09655	6.51843	0.026647	k9me2_wt_r2_peaks_unique	94.7928	88.6565
1	5285107	5285306	100	-0.11344	7.20421	0.0189167	k9me2_wt_r2_peaks_unique	141.778	153.376
1	6302735	6303007	136	0.17248	7.26209	0.0134421	k9me2_wt_r2_peaks_unique	162.955	144.593
1	7710400	7710721	161	0.17179	7.49185	0.011407	k9me2_wt_r2_peaks_unique	191.042	169.596
1	8471944	8472627	342	0.11085	7.17694	0.019031	k9me2_wt_r2_peaks_unique	150.369	139.248
1	8621974	8623046	536	0.5465	7.60776	1.63623e-05	k9me2_wt_r2_peaks_unique	235.733	161.401
1	10314958	10315197	120	0.01077	7.03883	0.02453	k9me2_wt_r2_peaks_unique	131.984	131.002
1	11493116	11493332	108	0.13142	6.96255	0.0189182	k9me2_wt_r2_peaks_unique	130.532	119.167
1	11649454	11649690	118	0.34023	6.91709	0.00454408	k9me2_wt_r2_peaks_unique	135.976	107.409
1	12166690	12166907	109	-0.02485	7.21297	0.0227828	k9me2_wt_r2_peaks_unique	147.089	149.644
1	12886672	12887654	491	-0.01668	8.07853	0.0170022	k9me2_wt_r2_peaks_unique	268.763	271.888
1	12958022	12958280	129	0.04434	7.41848	0.0204544	k9me2_wt_r2_peaks_unique	173.724	168.466
1	12993131	12993329	99	0.1644	7.21914	0.0142369	k9me2_wt_r2_peaks_unique	157.733	140.745
1	13388332	13388710	189	-0.02603	7.64249	0.0195409	k9me2_wt_r2_peaks_unique	198.016	201.621
1	16142713	16142916	102	-0.06819	7.46053	0.019407	k9me2_wt_r2_peaks_unique	172.02	180.346
1	16184166	16184417	126	0.24567	7.23088	0.00750744	k9me2_wt_r2_peaks_unique	163.564	137.954
1	16400444	16400800	178	0.15409	6.99139	0.0179392	k9me2_wt_r2_peaks_unique	134.218	120.622
1	16793766	16794201	218	0.40954	7.2268	0.00108307	k9me2_wt_r2_peaks_unique	172.634	129.97
1	16868109	16868493	192	0.11176	7.4322	0.0161574	k9me2_wt_r2_peaks_unique	179.53	166.147
1	17094640	17095059	210	0.09192	7.22569	0.0194909	k9me2_wt_r2_peaks_unique	154.52	144.982
1	17106990	17108041	526	0.21393	7.56968	0.00678638	k9me2_wt_r2_peaks_unique	204.598	176.401
1	17187963	17188234	136	0.12938	7.35073	0.0156421	k9me2_wt_r2_peaks_unique	170.712	156.069
1	18048058	18048274	108	0.41569	6.57761	0.00435452	k9me2_wt_r2_peaks_unique	110.313	82.6971
1	18643854	18644716	431	0.27145	7.7737	0.00280948	k9me2_wt_r2_peaks_unique	240.422	199.186
1	19236163	19236385	111	-0.1359	7.49365	0.0140745	k9me2_wt_r2_peaks_unique	171.933	188.916
1	19714050	19714881	416	0.51352	7.7884	1.76724e-05	k9me2_wt_r2_peaks_unique	264.14	185.033
1	19963353	19963942	295	2.75765	6.14602	1.39808e-30	k9me2_wt_r2_peaks_unique	184.164	27.2313
1	20172189	20172768	290	0.39057	7.11799	0.00180987	k9me2_wt_r2_peaks_unique	159.043	121.323
1	20205592	20205820	114	0.14405	6.60324	0.0221332	k9me2_wt_r2_peaks_unique	102.201	92.4893
1	20362924	20363159	118	0.513	6.31468	0.00279164	k9me2_wt_r2_peaks_unique	95.0872	66.6337
1	20625086	20625572	243	0.40595	7.0073	0.00204794	k9me2_wt_r2_peaks_unique	148.084	111.765
1	21034557	21034768	106	0.06176	7.07539	0.0226975	k9me2_wt_r2_peaks_unique	137.785	132.011
1	21127912	21128719	404	0.29687	6.98208	0.00662848	k9me2_wt_r2_peaks_unique	140.12	114.06
1	21276699	21277153	227	-0.02682	7.46619	0.0209505	k9me2_wt_r2_peaks_unique	175.19	178.478
1	21300421	21300963	271	0.17664	7.4737	0.0107226	k9me2_wt_r2_peaks_unique	188.971	167.194
1	21827021	21827353	166	0.12353	7.5076	0.0147134	k9me2_wt_r2_peaks_unique	189.935	174.349
1	23651723	23651991	134	0.05417	6.92305	0.024289	k9me2_wt_r2_peaks_unique	123.651	119.095
1	23880579	23880922	172	0.26365	6.97113	0.00963483	k9me2_wt_r2_peaks_unique	137.468	114.508
1	25660101	25660363	131	-0.012	6.53085	0.0292126	k9me2_wt_r2_peaks_unique	92.0822	92.8513
1	25779883	25780168	143	0.17385	6.59607	0.0197695	k9me2_wt_r2_peaks_unique	102.75	91.0852
1	27428520	27428903	192	-0.05407	7.21184	0.0218059	k9me2_wt_r2_peaks_unique	145.493	151.049
3	129162	130609	724	5.00199	7.01944	3.01555e-185	k9me2_wt_r2_peaks_unique	734.406	22.9186
3	1166496	1166720	112	0.33168	6.79945	0.00590798	k9me2_wt_r2_peaks_unique	124.957	99.2923
3	2138709	2138983	137	0.17476	6.85793	0.0171761	k9me2_wt_r2_peaks_unique	123.239	109.179
3	7749626	7750193	284	0.07265	7.71011	0.0168647	k9me2_wt_r2_peaks_unique	214.738	204.192
3	8272070	8272808	369	0.12935	7.91284	0.0110025	k9me2_wt_r2_peaks_unique	252.041	230.427
3	10115998	10116199	101	0.02892	7.29493	0.0219316	k9me2_wt_r2_peaks_unique	158.616	155.468
3	10522152	10522450	149	0.23884	7.1342	0.00856847	k9me2_wt_r2_peaks_unique	152.601	129.318
3	11024197	11024644	224	0.46541	7.66634	9.84135e-05	k9me2_wt_r2_peaks_unique	238.698	172.881
3	11826063	11826559	248	-0.03581	7.45769	0.0207725	k9me2_wt_r2_peaks_unique	173.619	177.983
3	11904763	11904976	107	-0.1692	7.33383	0.0127025	k9me2_wt_r2_peaks_unique	152.137	171.068
3	13046675	13046901	113	0.0866	6.82541	0.0237544	k9me2_wt_r2_peaks_unique	116.866	110.057
3	13225168	13225449	141	0.14446	7.72619	0.0109539	k9me2_wt_r2_peaks_unique	222.617	201.406
3	13293647	13293943	148	-0.12082	7.72612	0.0132245	k9me2_wt_r2_peaks_unique	203.053	220.79
3	13592736	13593622	443	-0.00973	10.3767	0.00761899	k9me2_wt_r2_peaks_unique	1325.04	1334
3	15485195	15485397	101	0.19106	7.16742	0.0125771	k9me2_wt_r2_peaks_unique	153.591	134.54
3	16204947	16205162	108	0.13021	7.25951	0.0165582	k9me2_wt_r2_peaks_unique	160.298	146.464
3	16408548	16408896	174	0.03275	7.66562	0.0194018	k9me2_wt_r2_peaks_unique	205.358	200.748
3	16455892	16456348	228	-0.01932	7.59317	0.0201879	k9me2_wt_r2_peaks_unique	191.807	194.393
3	16527838	16528239	201	0.10537	7.91568	0.0134594	k9me2_wt_r2_peaks_unique	250.448	232.808
3	16787762	16787964	101	0.1441	6.62533	0.0220224	k9me2_wt_r2_peaks_unique	103.78	93.9148
3	16848079	16848820	371	-0.10088	8.02253	0.0128125	k9me2_wt_r2_peaks_unique	251.095	269.281
3	17141522	17141790	134	0.16786	7.5812	0.0108475	k9me2_wt_r2_peaks_unique	202.971	180.677
3	18254952	18255514	281	0.27468	7.5029	0.00427891	k9me2_wt_r2_peaks_unique	199.499	164.913
3	18634060	18634372	156	0.22915	6.53914	0.0160048	k9me2_wt_r2_peaks_unique	100.686	85.8987
3	20652332	20652664	166	-0.02049	7.05412	0.0242554	k9me2_wt_r2_peaks_unique	131.953	133.84
3	21968473	21968822	175	-0.00826	7.28923	0.0224957	k9me2_wt_r2_peaks_unique	155.967	156.863
2	53066	53396	165	-0.04594	8.47106	0.0135253	k9me2_wt_r2_peaks_unique	349.244	360.544
2	887548	887870	161	0.07555	7.16385	0.0216094	k9me2_wt_r2_peaks_unique	147.199	139.689
2	1075925	1076127	101	-0.02959	7.06996	0.0238997	k9me2_wt_r2_peaks_unique	132.989	135.745
2	1078760	1079027	134	0.10401	7.04373	0.0203112	k9me2_wt_r2_peaks_unique	136.782	127.268
2	1367392	1367934	271	0.14569	7.17977	0.0167118	k9me2_wt_r2_peaks_unique	152.495	137.847
2	1620742	1620967	113	0.14069	7.18222	0.0167118	k9me2_wt_r2_peaks_unique	152.489	138.321
2	1954153	1955011	429	0.22913	7.56954	0.00579808	k9me2_wt_r2_peaks_unique	205.658	175.457
2	2160420	2160711	146	0.03002	7.31321	0.0218003	k9me2_wt_r2_peaks_unique	160.699	157.39
2	2260760	2260999	120	0.01295	7.06605	0.0241662	k9me2_wt_r2_peaks_unique	134.599	133.396
2	2518708	2518919	106	0.66458	7.17006	1.10605e-05	k9me2_wt_r2_peaks_unique	181.314	114.386
2	3113801	3114032	116	0.03524	7.64239	0.0193455	k9me2_wt_r2_peaks_unique	202.252	197.372
2	3218717	3219476	380	-0.02096	7.61718	0.0198828	k9me2_wt_r2_peaks_unique	194.915	197.767
2	3612379	3613820	721	-0.02234	9.73688	0.00918848	k9me2_wt_r2_peaks_unique	846.702	859.915
2	3615193	3615927	367	0.02161	10.6048	0.0065657	k9me2_wt_r2_peaks_unique	1568.94	1545.61
2	3617357	3617660	152	0.02178	10.733	0.00619117	k9me2_wt_r2_peaks_unique	1714.89	1689.19
2	3624244	3625153	455	0.00888	10.7534	0.00667073	k9me2_wt_r2_peaks_unique	1731.53	1720.9
2	3627496	3627893	199	0.01255	10.2254	0.00798428	k9me2_wt_r2_peaks_unique	1202.36	1191.95
2	4145672	4146368	348	0.99567	7.52111	7.30063e-12	k9me2_wt_r2_peaks_unique	259.384	130.082
2	4833200	4833704	252	-0.11627	7.7566	0.0137335	k9me2_wt_r2_peaks_unique	207.715	225.149
2	5402658	5403039	191	-0.06056	7.65561	0.0179658	k9me2_wt_r2_peaks_unique	197.448	205.913
2	5462594	5463061	234	0.14949	7.85798	0.00996129	k9me2_wt_r2_peaks_unique	244.336	220.286
2	6197923	6198477	277	0.34208	7.57481	0.00129463	k9me2_wt_r2_peaks_unique	214.651	169.339
2	6410752	6411276	262	0.0397	7.66221	0.0192107	k9me2_wt_r2_peaks_unique	205.367	199.793
2	6588750	6589651	451	-0.0232	8.02536	0.0170562	k9me2_wt_r2_peaks_unique	258.453	262.643
2	6682543	6682766	112	0.07756	7.39791	0.0192632	k9me2_wt_r2_peaks_unique	173.247	164.179
2	7661416	7662250	417	0.33203	7.76561	0.00109809	k9me2_wt_r2_peaks_unique	244.15	193.957
2	8590707	8591547	420	0.19194	7.48981	0.00945647	k9me2_wt_r2_peaks_unique	192.109	168.177
2	9496526	9496881	178	0.44586	7.29768	0.00051638	k9me2_wt_r2_peaks_unique	183.624	134.807
2	9557311	9557825	257	-0.0377	7.70734	0.0186812	k9me2_wt_r2_peaks_unique	206.284	211.746
2	10806848	10807504	328	-0.05064	7.28076	0.021716	k9me2_wt_r2_peaks_unique	152.794	158.252
2	11100986	11101205	110	-0.02946	6.97007	0.0247107	k9me2_wt_r2_peaks_unique	124.098	126.658
2	16302607	16302841	117	0.3115	6.5652	0.0101245	k9me2_wt_r2_peaks_unique	105.489	85.0035
2	19172200	19172419	110	0.21298	6.7108	0.0149821	k9me2_wt_r2_peaks_unique	112.774	97.2961
5	347646	348084	219	0.24934	7.47725	0.00550354	k9me2_wt_r2_peaks_unique	194.27	163.436
5	6419985	6420195	105	0.08984	6.36044	0.0287609	k9me2_wt_r2_peaks_unique	84.7628	79.6454
5	8322397	8322639	121	0.32033	6.78671	0.00733294	k9me2_wt_r2_peaks_unique	123.372	98.8072
5	8911222	8911444	111	0.12132	6.57672	0.0243594	k9me2_wt_r2_peaks_unique	99.5521	91.5229
5	9808952	9809217	133	0.15409	6.99139	0.0179392	k9me2_wt_r2_peaks_unique	134.218	120.622
5	10267105	10268419	657	0.05136	7.90599	0.0170282	k9me2_wt_r2_peaks_unique	244.158	235.619
5	10317600	10318177	289	-0.03274	7.94102	0.017332	k9me2_wt_r2_peaks_unique	242.973	248.55
5	10537908	10538278	185	0.11596	7.42597	0.0161777	k9me2_wt_r2_peaks_unique	179.017	165.191
5	10672763	10673344	291	0.7231	7.36023	7.77931e-07	k9me2_wt_r2_peaks_unique	211.1	127.883
5	11724227	11724929	351	0.04294	10.3756	0.00581313	k9me2_wt_r2_peaks_unique	1348.42	1308.87
5	11729443	11729943	250	0.01108	10.7366	0.00666133	k9me2_wt_r2_peaks_unique	1712.78	1699.67
5	12884883	12885160	139	-0.01481	9.59402	0.00993692	k9me2_wt_r2_peaks_unique	768.88	776.814
5	12886798	12887416	309	-0.04222	9.53879	0.0087892	k9me2_wt_r2_peaks_unique	733.005	754.774
5	13223116	13223357	121	0.0672	7.20827	0.0213639	k9me2_wt_r2_peaks_unique	151.363	144.474
5	13483274	13483553	140	0.17006	7.02786	0.0160543	k9me2_wt_r2_peaks_unique	138.418	123.027
5	13602598	13602816	109	0.2133	7.04435	0.0124145	k9me2_wt_r2_peaks_unique	142.123	122.59
5	13892232	13892454	111	0.29551	7.21567	0.00463314	k9me2_wt_r2_peaks_unique	164.669	134.17
5	14436662	14437291	315	0.75008	7.35766	2.80052e-07	k9me2_wt_r2_peaks_unique	212.704	126.467
5	14493446	14493819	187	0.07657	7.04051	0.0223981	k9me2_wt_r2_peaks_unique	135.185	128.198
5	14495941	14496561	310	0.61343	7.47308	7.21969e-06	k9me2_wt_r2_peaks_unique	219.762	143.645
5	14745810	14746992	591	0.14199	7.80249	0.0109865	k9me2_wt_r2_peaks_unique	234.507	212.526
5	15253229	15253584	178	0.24525	6.98561	0.00966943	k9me2_wt_r2_peaks_unique	137.972	116.403
5	15344521	15344736	108	0.04583	6.98109	0.0243246	k9me2_wt_r2_peaks_unique	128.356	124.342
5	15401453	15402107	327	0.1405	7.7448	0.0115249	k9me2_wt_r2_peaks_unique	225.198	204.301
5	15437251	15437476	113	-0.03483	6.81854	0.0262754	k9me2_wt_r2_peaks_unique	111.517	114.242
5	15680805	15681121	158	0.03041	8.81638	0.0125643	k9me2_wt_r2_peaks_unique	455.588	446.085
5	15694293	15694714	211	0.05692	8.37127	0.013637	k9me2_wt_r2_peaks_unique	337.731	324.665
5	15841067	15841330	132	1.08964	6.32818	3.53715e-07	k9me2_wt_r2_peaks_unique	117.214	55.0763
5	16899403	16899913	255	0.20314	7.66698	0.00704481	k9me2_wt_r2_peaks_unique	218.055	189.415
5	17347093	17347306	107	-0.02177	6.87843	0.0257234	k9me2_wt_r2_peaks_unique	116.772	118.547
5	18642084	18642299	108	0.02424	6.99752	0.0247165	k9me2_wt_r2_peaks_unique	128.858	126.711
5	19998188	19998386	99	-0.02063	6.83181	0.0261622	k9me2_wt_r2_peaks_unique	113.103	114.732
5	20756762	20757031	135	0.22762	6.8073	0.0140086	k9me2_wt_r2_peaks_unique	121.189	103.5
5	22094516	22094761	123	0.05155	7.4906	0.0199895	k9me2_wt_r2_peaks_unique	183.086	176.659
5	22335150	22335365	108	0.22042	6.70042	0.0149664	k9me2_wt_r2_peaks_unique	112.255	96.3498
5	22675262	22675524	131	0.05015	7.55528	0.0196016	k9me2_wt_r2_peaks_unique	191.388	184.849
5	24313890	24314407	259	0.05783	6.99275	0.0237688	k9me2_wt_r2_peaks_unique	129.937	124.831
5	25178902	25179141	120	0.32456	6.6427	0.00756613	k9me2_wt_r2_peaks_unique	111.816	89.2896
5	25264871	25265093	111	0.1795	6.67236	0.0184604	k9me2_wt_r2_peaks_unique	108.542	95.8436
5	26015506	26015723	109	0.05888	6.41985	0.0296766	k9me2_wt_r2_peaks_unique	87.3836	83.889
4	1521367	1521667	150	0.31751	6.85988	0.00616476	k9me2_wt_r2_peaks_unique	129.664	104.049
4	2763072	2763591	260	0.44075	7.50547	0.000291802	k9me2_wt_r2_peaks_unique	211.695	155.967
4	3955594	3955845	126	0.05517	10.2417	0.0052376	k9me2_wt_r2_peaks_unique	1234.12	1187.82
4	5142179	5142418	120	0.02719	7.26706	0.0225669	k9me2_wt_r2_peaks_unique	155.488	152.585
4	5297748	5297969	111	0.29556	6.99345	0.0066714	k9me2_wt_r2_peaks_unique	141.164	115.014
4	5343530	5344229	350	0.17929	7.7125	0.00871229	k9me2_wt_r2_peaks_unique	223.193	197.11
4	5375010	5375235	113	-0.00269	7.30089	0.0224245	k9me2_wt_r2_peaks_unique	157.537	157.831
4	5415899	5416126	114	0.05349	7.54186	0.0193336	k9me2_wt_r2_peaks_unique	189.835	182.926
4	5673365	5673683	159	0.01645	7.56785	0.0203448	k9me2_wt_r2_peaks_unique	190.821	188.657
4	5919250	5919519	135	-0.13511	7.2463	0.0165777	k9me2_wt_r2_peaks_unique	144.883	159.107
4	6683330	6684231	451	0.13705	7.85795	0.010998	k9me2_wt_r2_peaks_unique	243.28	221.233
4	7089691	7089974	142	0.38625	6.8204	0.00367787	k9me2_wt_r2_peaks_unique	129.206	98.8573
4	8030403	8030619	108	0.30093	6.66103	0.00947059	k9me2_wt_r2_peaks_unique	112.322	91.1749
4	11120479	11120679	100	0.1428	6.98561	0.0188537	k9me2_wt_r2_peaks_unique	133.159	120.61
4	13316728	13316948	110	0.01327	6.93079	0.0253061	k9me2_wt_r2_peaks_unique	122.567	121.445
4	13472650	13472951	151	0.3462	6.99516	0.00384358	k9me2_wt_r2_peaks_unique	143.834	113.147
4	15441810	15442053	122	0.32781	7.22701	0.00339115	k9me2_wt_r2_peaks_unique	167.837	133.723
Pt	383	2045	1111	-0.47209	8.39486	2.0897e-06	merged_common_peaks	285.791	396.425
Pt	99788	110857	5912	-0.1265	9.46984	0.00273584	merged_common_peaks	678.681	740.877
Pt	127968	139173	5109	-0.10376	9.4393	0.00435481	merged_common_peaks	669.723	719.664
1	17530	18628	553	0.00313	8.91266	0.0128457	merged_common_peaks	482.446	481.401
1	55804	56439	314	-0.06536	7.70632	0.0173074	merged_common_peaks	204.172	213.634
1	77020	77438	210	0.22175	6.99711	0.0114302	merged_common_peaks	137.948	118.294
1	238351	239263	459	0.09325	8.67854	0.00922667	merged_common_peaks	423.191	396.703
1	257684	258694	507	0.08091	8.91357	0.0088032	merged_common_peaks	495.941	468.893
1	292077	292429	183	0.18184	7.1472	0.0133919	merged_common_peaks	150.97	133.092
1	431325	433859	1273	0.05724	9.70647	0.00704557	merged_common_peaks	852.225	819.074
1	499452	501042	783	-0.00574	9.0858	0.0120808	merged_common_peaks	542.293	544.455
1	696588	697452	431	0.1204	7.38127	0.016279	merged_common_peaks	173.822	159.905
1	758964	760341	686	0.07369	8.50258	0.0118442	merged_common_peaks	372.069	353.541
1	1194563	1195128	284	0.14677	7.52743	0.0127393	merged_common_peaks	194.121	175.344
1	1275989	1276608	302	-0.03428	7.59267	0.0198773	merged_common_peaks	190.749	195.335
1	1430376	1430942	287	0.07724	7.56914	0.0179363	merged_common_peaks	195.058	184.89
1	1441505	1444520	1486	0.02954	10.0171	0.00787743	merged_common_peaks	1046.85	1025.63
1	1445531	1445988	256	0.01419	7.59229	0.0201879	merged_common_peaks	193.929	192.031
1	1613331	1614561	611	0.02787	8.86048	0.0125277	merged_common_peaks	469.316	460.336
1	1975204	1976773	778	0.07683	9.35203	0.00690712	merged_common_peaks	671.128	636.323
1	2157112	2157761	304	-0.05483	7.80343	0.0172286	merged_common_peaks	219.186	227.677
1	2233972	2234850	425	0.06088	8.09478	0.0152675	merged_common_peaks	279.213	267.675
1	2531427	2534809	1697	0.01329	10.1801	0.0081052	merged_common_peaks	1165.49	1154.81
1	2587282	2588376	541	0.07358	8.51841	0.0115186	merged_common_peaks	376.159	357.456
1	2788359	2800735	6200	0.05061	10.2897	0.00541649	merged_common_peaks	1273.9	1229.98
1	3023534	3024279	372	0.05701	8.0258	0.0158615	merged_common_peaks	265.82	255.52
1	3073427	3074416	491	-0.02417	8.6555	0.0136198	merged_common_peaks	399.878	406.633
1	3342598	3345499	1433	0.22011	8.75229	0.00117997	merged_common_peaks	465.406	399.551
1	3360571	3361279	353	0.12724	8.54978	0.00705319	merged_common_peaks	391.644	358.582
1	3413658	3414693	496	-0.10891	8.33136	0.0100539	merged_common_peaks	310.168	334.489
1	3497928	3498252	164	0.05186	7.49861	0.0199397	merged_common_peaks	184.125	177.624
1	3780675	3785789	2557	0.02745	10.3317	0.00702631	merged_common_peaks	1301.04	1276.52
1	3825841	3827558	857	0.05424	9.32012	0.00890761	merged_common_peaks	651.328	627.295
1	3892448	3894240	905	-0.04188	8.57882	0.013324	merged_common_peaks	376.859	387.959
1	3897953	3899874	967	-0.03207	8.98062	0.0118158	merged_common_peaks	499.585	510.814
1	4093336	4094419	546	0.09296	8.2887	0.011585	merged_common_peaks	322.953	302.8
1	4110104	4113005	1450	-0.01985	9.65472	0.00956635	merged_common_peaks	800.521	811.611
1	4209260	4209517	130	0.04227	6.82754	0.0259327	merged_common_peaks	115.254	111.926
1	4329871	4334405	2262	0.08952	9.93511	0.00348757	merged_common_peaks	1009.81	949.056
1	4405911	4411335	2668	-0.03182	10.0115	0.00772317	merged_common_peaks	1020.9	1043.66
1	4620727	4621475	380	0.18212	7.83283	0.0074424	merged_common_peaks	242.845	214.045
1	4682597	4685945	1674	-0.0758	9.91527	0.0047531	merged_common_peaks	940.556	991.295
1	4785837	4786791	468	-0.02785	8.14085	0.0164098	merged_common_peaks	279.543	284.991
1	4830518	4831551	529	-0.03698	8.70527	0.0128383	merged_common_peaks	412.08	422.779
1	5098369	5102105	1863	-0.0081	9.88369	0.00911726	merged_common_peaks	942.037	947.341
1	5436987	5437219	113	-0.03489	6.97272	0.0247107	merged_common_peaks	124.093	127.13
1	5531381	5531822	215	-0.00017	7.4953	0.0210115	merged_common_peaks	180.42	180.441
1	5657793	5659206	706	0.01108	8.69596	0.0137768	merged_common_peaks	416.306	413.121
1	5679168	5681953	1379	0.01202	9.83103	0.00918233	merged_common_peaks	914.627	907.039
1	5691766	5696684	2453	0.02016	10.2611	0.00759081	merged_common_peaks	1235.79	1218.64
1	5700170	5701789	802	-0.02752	8.74975	0.0129681	merged_common_peaks	426.378	434.59
1	5798946	5799428	230	-0.13155	7.44727	0.0147957	merged_common_peaks	166.744	182.664
1	5863052	5863472	229	0.13724	6.9539	0.0189504	merged_common_peaks	130.014	118.216
1	5899096	5899791	352	0.11054	7.70885	0.0143667	merged_common_peaks	217.387	201.353
1	5911770	5916508	2381	0.01134	9.79695	0.00932789	merged_common_peaks	893.064	886.072
1	5958800	5959428	307	0.00579	7.89746	0.0182377	merged_common_peaks	238.915	237.958
1	5965695	5966733	518	-0.06388	8.33532	0.0134846	merged_common_peaks	315.912	330.215
1	5970780	5971683	300	0.19296	7.60171	0.00849957	merged_common_peaks	207.676	181.677
1	5974966	5975643	338	-0.07985	7.83594	0.0155088	merged_common_peaks	222.246	234.894
1	6009551	6014164	2286	0.01231	9.91377	0.00889353	merged_common_peaks	968.713	960.482
1	6074852	6075403	281	0.24769	7.53475	0.00522972	merged_common_peaks	202.054	170.179
1	6140781	6141463	399	0.22601	7.4134	0.00803908	merged_common_peaks	184.363	157.63
1	6156516	6158884	1163	-0.10777	9.49767	0.00382872	merged_common_peaks	696.406	750.42
1	6197340	6198997	632	-0.0975	8.48142	0.00997298	merged_common_peaks	345.531	369.689
1	6211224	6211672	230	0.10015	7.74452	0.0148177	merged_common_peaks	222.028	207.138
1	6218678	6218945	130	0.24339	6.66878	0.0137886	merged_common_peaks	110.697	93.5123
1	6235815	6237727	956	-0.00933	8.70594	0.0137277	merged_common_peaks	416.241	418.942
1	6273501	6276369	1425	-0.01324	9.83705	0.00912289	merged_common_peaks	910.446	918.84
1	6403295	6405138	901	-0.11294	8.70445	0.0071945	merged_common_peaks	401.145	433.81
1	6454729	6455744	508	0.09491	8.12262	0.0126333	merged_common_peaks	288.03	269.691
1	6470424	6470851	220	0.04511	7.43527	0.0203483	merged_common_peaks	175.804	170.392
1	6514605	6515159	309	-0.04418	7.03684	0.0238855	merged_common_peaks	129.315	133.337
1	6538364	6543575	2613	-0.03794	9.9903	0.00739301	merged_common_peaks	1003.85	1030.6
1	6574246	6575274	550	-0.04409	8.06966	0.0162007	merged_common_peaks	264.59	272.801
1	6588051	6593578	2751	0.06439	10.1777	0.00472849	merged_common_peaks	1184.38	1132.68
1	6657263	6660425	1425	0.01613	9.80911	0.00915885	merged_common_peaks	902.12	892.09
1	6704117	6709698	2788	-0.03882	9.87708	0.00779009	merged_common_peaks	927.8	953.104
1	6736129	6737233	555	0.06454	8.75549	0.011009	merged_common_peaks	441.956	422.621
1	6743064	6744117	520	0.04701	8.6133	0.0127962	merged_common_peaks	398.05	385.288
1	6906144	6906542	206	0.12774	7.48968	0.0147373	merged_common_peaks	187.865	171.946
1	7023568	7024316	372	0.20295	7.85	0.00572551	merged_common_peaks	247.533	215.049
1	7035576	7037097	706	0.073	8.5913	0.0110811	merged_common_peaks	395.573	376.055
1	7066134	7075768	4804	-0.00399	9.71243	0.00972595	merged_common_peaks	837.784	840.105
1	7241098	7241463	187	0.0636	7.1176	0.0224118	merged_common_peaks	141.966	135.843
1	7255001	7257228	1114	0.0066	8.93058	0.0127405	merged_common_peaks	489.064	486.832
1	7281758	7283914	1100	-0.02098	8.64841	0.0137706	merged_common_peaks	398.358	404.193
1	7352867	7365216	6180	0.02651	10.2862	0.00718078	merged_common_peaks	1260.23	1237.29
1	7392312	7393419	552	-0.09119	8.40828	0.0107186	merged_common_peaks	329.169	350.647
1	7430093	7432088	1031	-0.01356	8.90708	0.0127657	merged_common_peaks	477.812	482.324
1	7714681	7715059	190	0.05405	7.55728	0.0192443	merged_common_peaks	191.913	184.856
1	7717415	7722558	2581	0.00479	10.0792	0.00854332	merged_common_peaks	1083.61	1080.02
1	7725268	7725830	281	0.02104	7.96288	0.0176902	merged_common_peaks	251.323	247.685
1	7745461	7748067	1349	0.16452	9.12634	0.00191577	merged_common_peaks	591.65	527.885
1	7761065	7762202	566	-0.01505	9.04931	0.0120444	merged_common_peaks	527.046	532.573
1	7833536	7833923	170	-0.06103	6.90411	0.0244701	merged_common_peaks	117.262	122.329
1	7959945	7961294	680	0.019	8.96295	0.0123997	merged_common_peaks	502.316	495.743
1	7969460	7974027	2277	0.06067	10.2735	0.00464436	merged_common_peaks	1264.04	1211.98
1	7985146	7986210	518	-0.00682	8.23537	0.016226	merged_common_peaks	300.654	302.079
1	8115151	8116381	627	0.06878	8.65709	0.0112283	merged_common_peaks	413.424	394.177
1	8190025	8190420	198	-0.05044	7.07448	0.0232019	merged_common_peaks	132.446	137.158
1	8201293	8201506	108	-0.30457	7.50009	0.00288028	merged_common_peaks	162.896	201.184
1	8204809	8205430	312	-0.00986	7.93288	0.0180132	merged_common_peaks	243.529	245.199
1	8236009	8239529	2208	0.09845	8.23467	0.0112718	merged_common_peaks	311.674	291.115
1	8266739	8267444	364	0.26294	7.67158	0.00370456	merged_common_peaks	223.333	186.123
1	8276466	8278662	1090	0.04493	9.34356	0.00948613	merged_common_peaks	659.864	639.631
1	8289475	8291283	851	-0.17586	9.02732	0.00174182	merged_common_peaks	490.936	554.579
1	8319638	8320467	419	0.04507	8.3167	0.0145998	merged_common_peaks	323.862	313.901
1	8388946	8391361	1223	0.1328	9.1182	0.00371866	merged_common_peaks	581.889	530.717
1	8453371	8461670	4150	0.05739	10.1399	0.0053622	merged_common_peaks	1150.91	1106.03
1	8475163	8476226	520	-0.08526	8.23882	0.0124138	merged_common_peaks	293.291	311.146
1	8488438	8492726	2142	0.06345	9.56888	0.00715275	merged_common_peaks	776.372	742.967
1	8539424	8539680	130	0.1161	7.366	0.0163194	merged_common_peaks	171.736	158.457
1	8577402	8578080	331	-0.16728	7.59766	0.0108616	merged_common_peaks	182.787	205.259
1	8590951	8591331	195	-0.02563	7.10716	0.0238192	merged_common_peaks	136.65	139.1
1	8644296	8649324	2507	-0.00577	9.12832	0.0118968	merged_common_peaks	558.508	560.747
1	8690917	8691771	312	-0.09524	7.58273	0.0163471	merged_common_peaks	185.479	198.136
1	8728800	8733611	2410	0.03167	10.4602	0.0063376	merged_common_peaks	1424.29	1393.36
1	8765583	8767423	928	0.02803	9.86907	0.00845916	merged_common_peaks	944.289	926.12
1	8771577	8775835	2165	0.03996	10.421	0.00585491	merged_common_peaks	1390.12	1352.14
1	8778165	8781801	1818	0.06531	9.91588	0.0054998	merged_common_peaks	988.115	944.381
1	8786068	8798411	6187	0.03948	10.1777	0.00664542	merged_common_peaks	1174.19	1142.49
1	8800684	8804348	1830	-0.0093	9.92359	0.00896822	merged_common_peaks	968.052	974.312
1	8808555	8812726	2099	0.02288	10.5682	0.00658474	merged_common_peaks	1530.32	1506.24
1	8815072	8818719	1820	0.01503	9.94194	0.00872171	merged_common_peaks	988.745	978.498
1	8822976	8827159	2093	0.03761	10.5572	0.00557267	merged_common_peaks	1526.51	1487.23
1	8829454	8833095	1819	0.04743	9.91436	0.00696495	merged_common_peaks	980.977	949.25
1	8837861	8838148	139	0.10745	7.38761	0.0169362	merged_common_peaks	173.806	161.332
1	8869858	8870734	446	0.12893	8.11111	0.00964476	merged_common_peaks	289.13	264.412
1	8927628	8933154	2760	0.05046	10.3423	0.00530114	merged_common_peaks	1321.15	1275.74
1	9004821	9015817	5470	0.06913	10.0728	0.00458927	merged_common_peaks	1103.11	1051.49
1	9077648	9079150	550	-0.34745	7.90167	0.000553503	merged_common_peaks	212.004	269.734
1	9136494	9137237	366	-0.12055	7.98092	0.0114747	merged_common_peaks	242.299	263.415
1	9175252	9177968	1355	0.0443	10.0126	0.00685035	merged_common_peaks	1048.96	1017.24
1	9204005	9205406	702	-0.02782	8.0015	0.0171822	merged_common_peaks	253.807	258.749
1	9236023	9237030	409	0.11034	7.73279	0.0143131	merged_common_peaks	221.009	204.736
1	9304807	9305894	543	0.0342	9.15129	0.0109821	merged_common_peaks	575.387	561.908
1	9367587	9373668	3047	-0.00042	10.0304	0.00872122	merged_common_peaks	1045.62	1045.92
1	9384159	9384500	168	-0.04595	7.40089	0.0205622	merged_common_peaks	166.331	171.714
1	9574223	9584023	4896	0.05867	9.95092	0.00598586	merged_common_peaks	1010.08	969.828
1	9586969	9587589	299	-0.05203	7.862	0.0169513	merged_common_peaks	228.49	236.88
1	9676464	9691298	7409	0.0484	9.9744	0.00667322	merged_common_peaks	1023.01	989.256
1	9706370	9708431	1072	0.01764	10.0676	0.00827673	merged_common_peaks	1079.72	1066.6
1	9754646	9756494	970	0.22093	8.78774	0.000986176	merged_common_peaks	477.119	409.374
1	9811822	9812436	300	0.10501	7.94818	0.0129319	merged_common_peaks	256.122	238.141
1	9816573	9817775	611	-0.01565	8.71784	0.0136146	merged_common_peaks	418.77	423.338
1	9853252	9853614	198	0.00095	7.34601	0.0220784	merged_common_peaks	162.747	162.64
1	9862898	9863174	135	0.11608	7.25229	0.0173157	merged_common_peaks	158.719	146.449
1	9865758	9866890	574	0.03479	8.44837	0.014236	merged_common_peaks	353.549	345.125
1	9908930	9909517	293	-0.41978	7.76551	0.000179863	merged_common_peaks	188.134	251.672
1	9915501	9916313	421	-0.1394	8.0235	0.00959819	merged_common_peaks	247.932	273.084
1	9918612	9919233	309	-0.1725	7.55024	0.0108166	merged_common_peaks	176.557	198.981
1	9925475	9925967	256	-0.13356	7.36014	0.015627	merged_common_peaks	156.863	172.078
1	10007629	10008493	436	-0.09641	7.6541	0.0161115	merged_common_peaks	194.806	208.269
1	10021544	10023449	913	-0.01168	8.54237	0.0145233	merged_common_peaks	371.323	374.341
1	10152754	10156563	1911	-0.08068	9.58508	0.00557714	merged_common_peaks	746.884	789.842
1	10347113	10349347	1107	0.05652	9.72875	0.00702636	merged_common_peaks	865.272	832.029
1	10357165	10363261	3001	0.05034	10.3083	0.00540851	merged_common_peaks	1290.32	1246.07
1	10421346	10421727	191	0.19696	6.91886	0.0141338	merged_common_peaks	129.548	113.016
1	10506688	10507235	273	-0.00544	7.677	0.0196903	merged_common_peaks	204.262	205.034
1	10526094	10528905	1410	0.01147	8.82565	0.0131197	merged_common_peaks	455.525	451.917
1	10531914	10534846	1475	0.05798	9.71035	0.0069026	merged_common_peaks	854.739	821.069
1	10568434	10569116	348	-0.07403	7.96428	0.0150743	merged_common_peaks	243.413	256.23
1	10579807	10580145	155	-0.03418	7.17073	0.0228462	merged_common_peaks	142.384	145.797
1	10591819	10592137	161	-0.1037	7.17266	0.019031	merged_common_peaks	139.18	149.553
1	10602860	10605042	1069	-0.07422	9.43135	0.00689026	merged_common_peaks	672.896	708.419
1	10624001	10624514	219	0.09913	7.07342	0.0209158	merged_common_peaks	139.39	130.134
1	10659875	10660434	290	0.0447	7.79167	0.0179266	merged_common_peaks	225.037	218.172
1	10696744	10701524	2397	0.04727	10.4333	0.00517462	merged_common_peaks	1405.59	1360.28
1	10723884	10724940	551	0.01412	8.10966	0.0168199	merged_common_peaks	277.572	274.869
1	10802533	10803304	381	-0.05091	8.3568	0.0139539	merged_common_peaks	322.096	333.665
1	10915104	10916329	614	0.03468	8.64681	0.0132326	merged_common_peaks	405.666	396.031
1	10922651	10924794	1063	0.02079	9.0849	0.011752	merged_common_peaks	546.961	539.136
1	10929467	10932063	1285	-0.02414	9.12019	0.0115286	merged_common_peaks	551.845	561.157
1	10964608	10966218	851	-0.16816	8.72595	0.00313902	merged_common_peaks	399.45	448.831
1	10982388	10983321	477	0.03015	8.27046	0.0155816	merged_common_peaks	312.029	305.575
1	11020253	11020686	247	-0.23031	7.6285	0.00597576	merged_common_peaks	182.702	214.325
1	11046435	11051458	2513	-0.09575	9.33293	0.00542679	merged_common_peaks	623.85	666.659
1	11064583	11067071	1311	0.06085	9.56078	0.0073144	merged_common_peaks	771.33	739.474
1	11089346	11090088	361	-0.09327	8.03937	0.0132106	merged_common_peaks	254.714	271.725
1	11097067	11100793	1859	-0.13814	9.62577	0.00161664	merged_common_peaks	753.101	828.777
1	11102373	11103955	786	0.04173	9.32959	0.00966434	merged_common_peaks	652.781	634.17
1	11111140	11111890	434	0.03977	7.57978	0.0197192	merged_common_peaks	193.967	188.693
1	11125904	11128394	1077	0.05614	8.5808	0.0126812	merged_common_peaks	390.416	375.516
1	11148099	11152978	2428	-0.03161	10.1708	0.00725559	merged_common_peaks	1140.18	1165.44
1	11174280	11174697	209	-0.11434	7.5553	0.0152463	merged_common_peaks	180.785	195.696
1	11286863	11287297	213	0.13583	7.66171	0.0126989	merged_common_peaks	212.251	193.179
1	11301360	11310242	4448	0.01173	10.1591	0.00819487	merged_common_peaks	1148.03	1138.73
1	11322954	11323827	439	-0.14696	8.3452	0.00677811	merged_common_peaks	309.055	342.196
1	11351554	11352174	334	-0.17674	7.66237	0.00974738	merged_common_peaks	190.547	215.38
1	11408023	11409895	936	-0.08147	8.65378	0.0104078	merged_common_peaks	391.548	414.295
1	11427811	11428237	197	0.12591	7.0818	0.0185631	merged_common_peaks	141.509	129.683
1	11479131	11479709	289	0.04428	7.87238	0.0174764	merged_common_peaks	237.951	230.758
1	11490177	11491036	473	0.06236	7.71166	0.0176873	merged_common_peaks	214.204	205.142
1	11502914	11512656	4868	0.03314	10.0119	0.00772317	merged_common_peaks	1044.38	1020.66
1	11517619	11522418	2461	0.01675	9.46975	0.0103562	merged_common_peaks	713.181	704.949
1	11609969	11610411	224	0.22517	7.57147	0.00629223	merged_common_peaks	205.651	175.933
1	11636913	11637408	227	-0.17768	7.58214	0.00962447	merged_common_peaks	180.181	203.796
1	11643234	11644557	664	0.05453	8.75205	0.0117115	merged_common_peaks	439.377	423.08
1	11661095	11661625	262	-0.14466	7.57839	0.0127293	merged_common_peaks	181.781	200.954
1	11692323	11693419	549	-0.06456	7.83181	0.0167367	merged_common_peaks	222.788	232.984
1	11700069	11701615	791	-0.07995	8.53549	0.0111852	merged_common_peaks	360.915	381.48
1	11704017	11704996	478	-0.23397	8.20949	0.00235542	merged_common_peaks	272.952	321.01
1	11706856	11708685	908	-0.07304	8.33277	0.0125547	merged_common_peaks	314.355	330.68
1	11710974	11711548	316	-0.26828	7.37737	0.00568265	merged_common_peaks	151.506	182.469
1	11721260	11722011	382	0.0223	7.60367	0.0199823	merged_common_peaks	196.015	193.008
1	11733380	11734405	520	0.01452	8.28757	0.0158371	merged_common_peaks	314.046	310.901
1	11735810	11736966	590	-0.05186	8.21234	0.0147898	merged_common_peaks	291.31	301.972
1	11752282	11754926	1286	-0.01161	9.666	0.00974704	merged_common_peaks	809.112	815.649
1	11789366	11794146	2382	-0.02994	10.0007	0.00791356	merged_common_peaks	1013.91	1035.17
1	11803710	11803997	150	-0.04745	6.91667	0.0247888	merged_common_peaks	118.846	122.819
1	11806096	11806388	135	-0.09632	6.90842	0.0225256	merged_common_peaks	116.183	124.205
1	11807648	11808256	309	0.08878	7.58254	0.0168745	merged_common_peaks	197.667	185.87
1	11817827	11818513	338	0.04572	7.63357	0.0188151	merged_common_peaks	201.751	195.457
1	11834669	11837534	1430	0.05863	9.89557	0.00613209	merged_common_peaks	972.049	933.337
1	11880114	11880497	170	-0.01511	7.4126	0.0214933	merged_common_peaks	169.489	171.273
1	11887176	11901866	7350	0.02408	9.64045	0.0093902	merged_common_peaks	804.802	791.481
1	11957986	11961099	1547	0.05937	9.51072	0.00767156	merged_common_peaks	744.643	714.621
1	12009917	12010290	186	0.00039	7.65945	0.0198358	merged_common_peaks	202.201	202.146
1	12013119	12020213	3573	0.04379	9.76314	0.00787786	merged_common_peaks	882.245	855.868
1	12022350	12022725	190	0.04812	7.5045	0.0198904	merged_common_peaks	184.639	178.582
1	12031685	12033025	687	-0.07984	8.20036	0.0132326	merged_common_peaks	286.113	302.393
1	12035420	12038347	1558	-0.06286	8.94949	0.01015	merged_common_peaks	483.731	505.273
1	12041122	12042090	613	0.03132	7.85664	0.0180379	merged_common_peaks	234.314	229.282
1	12077747	12080858	1559	-0.04045	8.93398	0.0115386	merged_common_peaks	482.289	496.003
1	12097188	12097884	382	0.12549	7.26182	0.0172903	merged_common_peaks	160.293	146.939
1	12137081	12137565	281	0.05691	7.41664	0.0204544	merged_common_peaks	174.26	167.519
1	12138833	12143278	2221	0.03081	10.1296	0.0074118	merged_common_peaks	1132.23	1108.31
1	12172571	12177010	2225	0.01025	9.87624	0.009083	merged_common_peaks	943.164	936.487
1	12183597	12183916	164	0.21045	6.88873	0.0140986	merged_common_peaks	127.465	110.164
1	12222582	12223073	314	0.23383	7.46932	0.00648549	merged_common_peaks	192.169	163.416
1	12252281	12253482	628	-0.03362	8.35292	0.0148504	merged_common_peaks	323.161	330.78
1	12263132	12264482	670	-0.03054	8.51946	0.0140931	merged_common_peaks	363.092	370.86
1	12273068	12276498	1677	-0.15484	8.95767	0.00292586	merged_common_peaks	471.218	524.606
1	12286633	12287655	501	0.01573	8.37602	0.0152911	merged_common_peaks	334.042	330.42
1	12291652	12294729	1560	-0.04674	8.71361	0.012247	merged_common_peaks	413.069	426.671
1	12297552	12300416	1363	-0.14343	8.38358	0.00683828	merged_common_peaks	317.776	350.992
1	12314987	12317105	1065	0.19412	8.5339	0.00291069	merged_common_peaks	396.44	346.531
1	12328189	12329691	764	-0.01037	8.79712	0.0133089	merged_common_peaks	443.237	446.435
1	12336936	12337799	573	-0.04266	7.62011	0.0191909	merged_common_peaks	193.848	199.665
1	12361698	12363918	1112	-0.01734	9.26864	0.011064	merged_common_peaks	613.096	620.51
1	12364755	12365803	525	-0.07446	8.13416	0.0141333	merged_common_peaks	273.791	288.293
1	12376629	12380245	1826	-0.01897	9.65429	0.00963159	merged_common_peaks	800.526	811.122
1	12401498	12410332	4415	-0.06687	9.91474	0.00537455	merged_common_peaks	943.125	987.868
1	12425093	12425707	336	-0.07439	8.06186	0.0143673	merged_common_peaks	260.414	274.194
1	12444407	12445774	702	-0.10035	8.11115	0.0122412	merged_common_peaks	267.052	286.288
1	12457766	12458133	190	0.11504	7.05478	0.0202635	merged_common_peaks	138.362	127.757
1	12466943	12471430	2235	0.02838	9.03499	0.011625	merged_common_peaks	529.754	519.435
1	12476966	12477388	252	-0.17227	6.97136	0.0160933	merged_common_peaks	118.211	133.204
1	12497456	12499083	818	-0.07726	8.9166	0.00904669	merged_common_peaks	470.474	496.356
1	12508404	12515225	3413	0.105	8.78953	0.00752194	merged_common_peaks	458.898	426.686
1	12526225	12527524	537	0.00381	8.11203	0.0169418	merged_common_peaks	277.037	276.306
1	12555202	12559257	2038	-0.04656	9.44246	0.00898589	merged_common_peaks	684.63	707.085
1	12562364	12563451	560	0.07655	8.05756	0.0139906	merged_common_peaks	273.583	259.445
1	12565382	12574550	4586	0.09611	9.36413	0.00527335	merged_common_peaks	681.318	637.409
1	12576345	12581553	2585	-0.05466	9.30932	0.00892295	merged_common_peaks	622.526	646.564
1	12590857	12595574	2363	-0.00229	9.21166	0.0115818	merged_common_peaks	592.436	593.377
1	12626940	12630994	2043	0.02063	9.60008	0.00973523	merged_common_peaks	781.659	770.561
1	12651385	12653303	958	0.06326	9.00125	0.0096266	merged_common_peaks	523.803	501.331
1	12664453	12684944	10243	0.02629	9.69415	0.00915619	merged_common_peaks	835.963	820.867
1	12691429	12692611	600	0.01549	8.36949	0.0153136	merged_common_peaks	332.506	328.955
1	12699224	12701902	1496	-0.04477	9.05271	0.0108505	merged_common_peaks	522.876	539.356
1	12711740	12735040	11683	0.05026	10.173	0.00587097	merged_common_peaks	1174.78	1134.56
1	12739825	12741581	855	-0.09559	8.88125	0.00780624	merged_common_peaks	456.179	487.428
1	12753550	12761573	3901	-0.09077	8.88371	0.00831771	merged_common_peaks	457.721	487.445
1	12766353	12768955	1313	-0.09035	8.74027	0.00890921	merged_common_peaks	414.462	441.248
1	12769759	12772229	1211	0.05585	8.51329	0.0126489	merged_common_peaks	372.531	358.385
1	12773179	12779107	3815	-0.02184	8.15374	0.0164701	merged_common_peaks	282.64	286.951
1	12779987	12782511	1281	0.05626	8.63626	0.0120383	merged_common_peaks	405.734	390.216
1	12783373	12785883	1242	-0.06752	8.56571	0.0117011	merged_common_peaks	370.146	387.881
1	12786844	12789414	1281	-0.01061	8.56352	0.0144092	merged_common_peaks	376.946	379.729
1	12790285	12792827	1262	-0.026	8.59239	0.0140232	merged_common_peaks	382.52	389.476
1	12793655	12796194	1263	-0.04019	8.57603	0.0133387	merged_common_peaks	376.351	386.983
1	12796977	12806251	7166	0.1493	8.46757	0.00570884	merged_common_peaks	372.79	336.14
1	12807150	12809534	1185	0.20292	8.7076	0.00173097	merged_common_peaks	448.53	389.678
1	12811114	12816398	2727	0.03152	8.90937	0.0122084	merged_common_peaks	486.107	475.602
1	12818285	12839649	10691	0.01219	9.40198	0.0107441	merged_common_peaks	679.38	673.664
1	12846020	12849696	1805	0.15824	8.75223	0.00357965	merged_common_peaks	455.514	408.194
1	12854079	12862321	4119	0.01295	9.9268	0.00885405	merged_common_peaks	977.718	968.981
1	12863147	12866341	1571	0.02341	9.23796	0.011011	merged_common_peaks	608.733	598.935
1	12875710	12876597	469	-0.10871	7.80924	0.0136476	merged_common_peaks	216	232.905
1	12899437	12903558	2111	-0.02518	8.57455	0.0139823	merged_common_peaks	377.926	384.58
1	12905202	12908257	1536	-0.0325	9.65091	0.0089944	merged_common_peaks	794.917	813.027
1	12926641	12931914	2681	0.01398	9.24736	0.0112702	merged_common_peaks	610.713	604.823
1	12942418	12946971	2280	0.0066	10.0117	0.00872509	merged_common_peaks	1034.68	1029.96
1	12949979	12953862	1927	0.01968	9.41217	0.0104879	merged_common_peaks	685.974	676.68
1	12959761	12960105	183	0.03715	7.10915	0.0233087	merged_common_peaks	139.849	136.294
1	12994621	13014553	9964	0.00251	9.83092	0.00933469	merged_common_peaks	911.548	909.964
1	13016335	13017395	515	-0.00954	8.18909	0.016445	merged_common_peaks	290.888	292.818
1	13018507	13024879	3117	0.03643	9.59975	0.0089015	merged_common_peaks	785.771	766.178
1	13027983	13028705	354	-0.15252	7.95925	0.00907346	merged_common_peaks	236.057	262.379
1	13042833	13043729	447	-0.04827	8.22576	0.0150012	merged_common_peaks	294.398	304.415
1	13055465	13057945	1244	-0.13111	8.68369	0.00605602	merged_common_peaks	392.932	430.314
1	13059370	13060365	503	-0.01705	8.33563	0.0154973	merged_common_peaks	321.15	324.968
1	13066085	13066637	282	0.10944	7.82476	0.0136258	merged_common_peaks	235.483	218.281
1	13067944	13068923	412	0.16009	8.06473	0.00744736	merged_common_peaks	283.023	253.297
1	13081020	13089228	4224	-0.0379	9.2787	0.0102103	merged_common_peaks	613.003	629.32
1	13097719	13102756	2536	0.03822	9.53948	0.00904066	merged_common_peaks	754.088	734.373
1	13107573	13111756	2064	-0.06959	9.38962	0.0074365	merged_common_peaks	654.761	687.118
1	13126978	13128145	575	0.07079	9.25262	0.00789888	merged_common_peaks	625.131	595.198
1	13131416	13140082	4332	-0.01239	9.91087	0.00893951	merged_common_peaks	958.527	966.794
1	13143787	13144588	407	-0.19972	7.86408	0.00575858	merged_common_peaks	217.402	249.681
1	13148375	13154124	2867	-0.02576	8.53328	0.0141747	merged_common_peaks	367.194	373.81
1	13166344	13167281	476	0.06274	7.87271	0.0161876	merged_common_peaks	239.533	229.339
1	13172868	13192508	9835	0.00476	9.75407	0.00957348	merged_common_peaks	864.936	862.087
1	13198971	13200024	522	-0.20922	8.20009	0.00368654	merged_common_peaks	273.516	316.201
1	13212423	13213019	363	-0.33712	7.48346	0.00181543	merged_common_peaks	159.222	201.135
1	13230589	13245077	7240	-0.17537	8.53227	0.00374	merged_common_peaks	348.396	393.428
1	13247609	13249317	917	-0.08394	8.25075	0.0123852	merged_common_peaks	295.862	313.587
1	13250526	13250879	180	0.01665	7.87332	0.0182362	merged_common_peaks	235.837	233.131
1	13256954	13257290	174	0.07296	7.23496	0.0211851	merged_common_peaks	154.498	146.879
1	13259445	13260918	737	0.05185	9.02213	0.0105852	merged_common_peaks	529.342	510.655
1	13263408	13276067	6346	0.09141	9.4823	0.0051987	merged_common_peaks	738.27	692.944
1	13282533	13288915	3190	0.01623	9.13575	0.0116356	merged_common_peaks	565.689	559.361
1	13291473	13303422	6127	-0.00322	9.43289	0.0107139	merged_common_peaks	690.396	691.938
1	13305275	13312472	3749	0.05447	8.79166	0.0113802	merged_common_peaks	451.598	434.865
1	13324026	13339652	7814	-0.00732	9.2494	0.0113912	merged_common_peaks	607.079	610.167
1	13347480	13349450	966	0.07602	8.45713	0.011639	merged_common_peaks	360.821	342.301
1	13355171	13355858	350	-0.14551	8.00231	0.00912146	merged_common_peaks	243.8	269.673
1	13356682	13357553	453	-0.16319	7.89669	0.00851285	merged_common_peaks	225.205	252.176
1	13372116	13387267	7247	0.00441	9.67419	0.00985567	merged_common_peaks	818.248	815.751
1	13389969	13403344	6530	-0.05576	8.86176	0.0109895	merged_common_peaks	456.313	474.295
1	13405054	13415464	5204	-0.08552	9.39185	0.00600171	merged_common_peaks	652.164	691.991
1	13418189	13422972	2366	-0.03519	9.15832	0.0108329	merged_common_peaks	564.459	578.396
1	13424845	13437189	6553	-0.05955	8.7252	0.0115566	merged_common_peaks	414.557	432.026
1	13438408	13449721	5580	0.06014	10.2375	0.00473821	merged_common_peaks	1232.67	1182.34
1	13477791	13479249	744	0.01927	8.47875	0.0146761	merged_common_peaks	359.136	354.371
1	13480061	13496118	8004	0.00389	9.9891	0.00882728	merged_common_peaks	1017.66	1014.92
1	13498417	13501725	1624	0.02208	8.79935	0.0129993	merged_common_peaks	448.943	442.125
1	13503703	13523420	9847	-0.01971	10.2835	0.0075395	merged_common_peaks	1237.91	1254.94
1	13524391	13527080	1330	-0.07269	8.67186	0.0109297	merged_common_peaks	397.694	418.245
1	13544536	13545370	411	0.09844	8.03321	0.0127938	merged_common_peaks	271.053	253.175
1	13559807	13565493	2837	0.00334	9.85723	0.00923903	merged_common_peaks	928.591	926.444
1	13568761	13569362	320	-0.07163	7.82519	0.0163961	merged_common_peaks	221.226	232.487
1	13571984	13581741	4876	0.05781	9.56696	0.0074622	merged_common_peaks	773.826	743.431
1	13583508	13585909	1279	-0.00172	8.15174	0.0167025	merged_common_peaks	284.223	284.562
1	13591692	13601668	5001	0.07659	10.0711	0.00404356	merged_common_peaks	1104.67	1047.55
1	13605180	13637371	16098	0.07105	9.45839	0.00688244	merged_common_peaks	721.03	686.381
1	13639133	13640173	383	-0.08757	7.72084	0.0163706	merged_common_peaks	204.656	217.463
1	13643631	13668103	12230	-0.0648	8.44173	0.0125802	merged_common_peaks	339.986	355.605
1	13674718	13682910	4066	-0.00675	9.77137	0.00949709	merged_common_peaks	871.886	875.974
1	13689351	13695160	2902	0.0197	9.59774	0.0098101	merged_common_peaks	780.14	769.56
1	13704058	13748371	21433	0.02983	9.4926	0.00971896	merged_common_peaks	727.859	712.964
1	13750897	13759629	4402	0.06986	8.85394	0.0100949	merged_common_peaks	474.042	451.634
1	13761152	13807693	23316	-0.00318	10.0413	0.00867983	merged_common_peaks	1052.59	1054.91
1	13812701	13813584	441	0.01312	8.08859	0.017034	merged_common_peaks	273.453	270.978
1	13814790	13815948	557	-0.01778	7.98482	0.0175527	merged_common_peaks	251.764	254.886
1	13818130	13836457	9134	-0.03093	9.91918	0.00808864	merged_common_peaks	957.889	978.647
1	13839745	13847602	3858	0.05278	9.61465	0.00784617	merged_common_peaks	798.44	769.757
1	13847984	13852448	2381	-0.00743	9.11599	0.0119285	merged_common_peaks	553.437	556.294
1	13854507	13855645	596	0.17236	8.04024	0.00698791	merged_common_peaks	279.445	247.977
1	13856451	13856824	185	0.1406	7.45112	0.0141122	merged_common_peaks	183.727	166.666
1	13857742	13858890	566	0.06483	8.22231	0.01417	merged_common_peaks	305.436	292.014
1	13861068	13878419	9652	0.08806	8.74896	0.0089045	merged_common_peaks	443.561	417.297
1	13880289	13895001	7411	0.0463	10.1944	0.0060557	merged_common_peaks	1190.7	1153.1
1	13901960	13964239	31137	0.01776	8.89635	0.0127514	merged_common_peaks	479.448	473.582
1	13966567	13979825	6671	0.05546	9.70819	0.00718138	merged_common_peaks	852.715	820.557
1	13982209	13985387	1559	-0.06969	8.17977	0.0139877	merged_common_peaks	283.052	297.061
1	13986273	13990252	3344	-0.01631	8.0448	0.0171905	merged_common_peaks	262.586	265.571
1	13991564	13998812	3621	-0.07101	8.82679	0.0101418	merged_common_peaks	443.038	465.39
1	14005005	14006634	819	0.03493	8.66293	0.0131752	merged_common_peaks	410.26	400.446
1	14009669	14011015	650	-0.13315	8.64096	0.00599481	merged_common_peaks	381.195	418.051
1	14012039	14013643	801	-0.15209	7.99635	0.00865294	merged_common_peaks	242.242	269.174
1	14014682	14024485	3792	0.17039	8.58946	0.00364917	merged_common_peaks	408.631	363.111
1	14031622	14033334	991	-0.16818	7.90243	0.00805243	merged_common_peaks	225.712	253.619
1	14035375	14146576	11125	0.04481	9.2489	0.00985855	merged_common_peaks	617.932	599.034
1	14178097	14283359	52631	-0.04222	10.1181	0.00662307	merged_common_peaks	1095.21	1127.73
1	14286414	14287925	728	-0.08428	8.58778	0.0105	merged_common_peaks	373.675	396.155
1	14296811	14299302	1286	-0.03477	8.98341	0.0116773	merged_common_peaks	500.083	512.282
1	14300107	14303271	1543	-0.04765	9.22644	0.00975315	merged_common_peaks	589.201	608.986
1	14309265	14511725	101543	-0.05406	9.41823	0.00842473	merged_common_peaks	671.48	697.118
1	14538677	14545769	3541	-0.04797	9.72962	0.00768547	merged_common_peaks	835.002	863.232
1	14581684	14604385	11342	-0.00423	9.89401	0.00912236	merged_common_peaks	950.073	952.863
1	14605233	14606876	820	0.01517	8.30365	0.0156636	merged_common_peaks	317.637	314.315
1	14609204	14610748	769	0.02606	9.35279	0.0104384	merged_common_peaks	659.77	647.96
1	14656968	14750866	46934	0.02605	9.33726	0.0104885	merged_common_peaks	652.704	641.024
1	14804071	14818169	7043	-0.05483	9.48113	0.00817734	merged_common_peaks	701.216	728.379
1	14819103	14861744	21078	-0.07567	9.02233	0.00871252	merged_common_peaks	506.527	533.804
1	14862733	14998834	81656	0.07856	9.36522	0.00672166	merged_common_peaks	677.699	641.782
1	14999727	15008578	4398	-0.07889	8.96639	0.00876155	merged_common_peaks	486.719	514.075
1	15009841	15080504	35235	0.0027	10.6993	0.00690866	merged_common_peaks	1664.23	1661.12
1	15087612	15602111	193508	-0.05001	9.39441	0.00877902	merged_common_peaks	661.412	684.741
1	15610263	15623227	6457	0.01844	9.90029	0.00878544	merged_common_peaks	961.745	949.53
1	15624419	15641319	7082	-0.03447	8.8006	0.0126267	merged_common_peaks	440.612	451.266
1	15643211	15649907	3365	0.00116	9.20256	0.011621	merged_common_peaks	589.415	588.941
1	15652998	15729969	38581	0.10428	9.52058	0.00386033	merged_common_peaks	761.51	708.41
1	15731122	15879265	89567	0.021	9.70365	0.0093543	merged_common_peaks	839.944	827.807
1	15884667	15886956	1131	-0.01206	8.9442	0.0125992	merged_common_peaks	490.521	494.638
1	15908836	15921571	6355	-0.00491	9.63467	0.00999073	merged_common_peaks	793.571	796.276
1	15939743	15940571	422	-0.09103	8.03535	0.013222	merged_common_peaks	254.203	270.759
1	15941818	15944804	1547	0.11787	8.43461	0.00860938	merged_common_peaks	360.422	332.146
1	15950005	15960043	5016	0.00934	9.43724	0.0106141	merged_common_peaks	695.502	691.013
1	15961495	15971717	6262	-0.05748	8.98423	0.0100821	merged_common_peaks	496.445	516.624
1	15987029	15990737	1860	-0.01397	9.04183	0.012135	merged_common_peaks	524.517	529.62
1	15991635	16067543	38756	-0.0972	9.52957	0.00460798	merged_common_peaks	714.589	764.393
1	16069918	16114707	22393	-0.03551	9.6678	0.00874774	merged_common_peaks	803.439	823.46
1	16116105	16125249	4629	0.01281	10.078	0.00838287	merged_common_peaks	1085.67	1076.08
1	16145656	16148403	1372	-0.01708	8.99799	0.0122585	merged_common_peaks	508.27	514.323
1	16165267	16170158	2456	0.04818	8.53475	0.0132885	merged_common_peaks	377.11	364.724
1	16171719	16181394	6183	-0.0445	8.79547	0.0121647	merged_common_peaks	437.524	451.23
1	16185812	16187105	692	-0.03795	8.04687	0.0165539	merged_common_peaks	260.998	267.955
1	16188991	16222484	31461	-0.01404	8.27297	0.0159125	merged_common_peaks	307.821	310.832
1	16223932	16225873	978	0.02504	8.3265	0.0153044	merged_common_peaks	323.814	318.242
1	16237511	16246641	4556	0.08245	9.28943	0.00672034	merged_common_peaks	643.883	608.117
1	16247466	16254150	3332	-0.15724	8.21998	0.00656296	merged_common_peaks	282.354	314.867
1	16256032	16256712	347	-0.14218	7.45696	0.0134257	merged_common_peaks	167.251	184.573
1	16258985	16262190	1376	-0.0605	8.41994	0.0129324	merged_common_peaks	335.389	349.752
1	16279376	16280580	547	0.04597	8.51217	0.0133759	merged_common_peaks	370.969	359.335
1	16281592	16306681	12532	-0.00835	9.21216	0.011504	merged_common_peaks	591.398	594.831
1	16311079	16342313	23480	0.06181	9.45887	0.00772357	merged_common_peaks	718.964	688.811
1	16343214	16346998	1912	-0.08939	8.50075	0.0102882	merged_common_peaks	351.177	373.624
1	16347986	16361021	6445	-0.05089	8.16795	0.0152361	merged_common_peaks	282.578	292.724
1	16363239	16397885	17728	0.01166	9.34653	0.0109024	merged_common_peaks	653.643	648.382
1	16404238	16407837	1809	-0.0792	8.76985	0.0097066	merged_common_peaks	424.685	448.651
1	16414018	16414660	330	0.09878	7.99696	0.0133013	merged_common_peaks	264.358	246.864
1	16418702	16421450	1375	-0.06522	8.9567	0.00991909	merged_common_peaks	485.757	508.22
1	16422483	16423101	306	0.0839	7.81171	0.0155949	merged_common_peaks	231.306	218.238
1	16430870	16434165	1669	-0.01474	9.78767	0.00927431	merged_common_peaks	879.354	888.384
1	16449317	16451688	1308	-0.01792	8.60376	0.0141521	merged_common_peaks	386.627	391.46
1	16452636	16453829	596	-0.17377	8.38205	0.00466352	merged_common_peaks	314.118	354.326
1	16455219	16460219	2507	-0.00909	9.45043	0.0105693	merged_common_peaks	697.421	701.829
1	16462692	16463460	394	0.03037	8.05274	0.0169026	merged_common_peaks	268.341	262.751
1	16474768	16477847	1544	-0.01249	9.27457	0.0112178	merged_common_peaks	616.657	622.019
1	16488887	16493121	2104	0.07289	9.78054	0.00548708	merged_common_peaks	902.001	857.561
1	16494457	16534712	20109	0.02009	10.6486	0.00652969	merged_common_peaks	1616.45	1594.1
1	16538506	16544466	2978	0.06581	9.01668	0.00938643	merged_common_peaks	529.903	506.274
1	16546230	16547022	485	-0.17302	7.56735	0.0108325	merged_common_peaks	178.631	201.392
1	16551151	16559050	3932	-0.13065	9.1388	0.00375383	merged_common_peaks	538.751	589.818
1	16568873	16575145	3138	-0.00847	9.53018	0.0102845	merged_common_peaks	737.217	741.558
1	16581529	16614196	15512	-0.0796	8.90679	0.00905512	merged_common_peaks	466.907	493.392
1	16624572	16637394	6402	0.00036	9.97372	0.00889287	merged_common_peaks	1005.64	1005.39
1	16659719	16664256	2273	-0.03138	9.71628	0.0088334	merged_common_peaks	832.087	850.384
1	16666247	16666768	257	0.13309	7.77143	0.0120782	merged_common_peaks	228.805	208.642
1	16671428	16686326	6848	-0.01347	9.9515	0.00878089	merged_common_peaks	985.536	994.781
1	16690082	16690538	207	0.0042	7.33051	0.0222149	merged_common_peaks	161.189	160.72
1	16691346	16699462	4067	0.02763	9.97323	0.00813183	merged_common_peaks	1014.85	995.595
1	16700998	16701500	251	-0.01154	7.82249	0.0186717	merged_common_peaks	225.459	227.269
1	16706956	16707183	116	-0.06299	7.17953	0.0220025	merged_common_peaks	141.832	148.161
1	16710135	16712786	1345	-0.06601	8.62539	0.0115613	merged_common_peaks	385.981	404.051
1	16716254	16718187	1080	0.21876	8.76396	0.00111172	merged_common_peaks	468.966	402.984
1	16723587	16736882	6672	-0.0077	9.94207	0.00893705	merged_common_peaks	981.075	986.325
1	16737703	16738511	422	-0.0414	8.55889	0.0133979	merged_common_peaks	371.75	382.573
1	16741950	16751757	4823	0.01845	9.37406	0.0106206	merged_common_peaks	667.806	659.32
1	16790553	16792167	813	0.04214	8.9862	0.0112067	merged_common_peaks	514.587	499.773
1	16815313	16816414	556	-0.11458	8.21477	0.0104878	merged_common_peaks	285.526	309.128
1	16825011	16825917	458	-0.05535	8.0639	0.0156923	merged_common_peaks	262.509	272.776
1	16841561	16843767	1164	-0.10721	7.97439	0.0124262	merged_common_peaks	242.323	261.016
1	16853312	16859162	2936	-0.04992	9.88795	0.00687574	merged_common_peaks	931.228	964.014
1	16870742	16870993	118	0.10595	7.18433	0.0189927	merged_common_peaks	150.885	140.201
1	16879444	16884134	3136	-0.61734	8.2663	1.44678e-08	merged_common_peaks	248.591	381.349
1	16885750	16886865	533	0.05037	8.37009	0.0139044	merged_common_peaks	336.69	325.137
1	16889897	16890921	312	-0.25975	7.42665	0.0053427	merged_common_peaks	157.235	188.252
1	16904281	16905395	571	-0.16718	8.40908	0.00500761	merged_common_peaks	320.791	360.204
1	16942774	16962501	9854	-0.07896	9.27238	0.00710945	merged_common_peaks	601.7	635.549
1	16966033	16967844	945	-0.0725	8.63427	0.0110051	merged_common_peaks	387.491	407.462
1	16985155	16989777	2297	0.02793	8.34775	0.0151932	merged_common_peaks	328.948	322.641
1	16997800	16998833	516	-0.13781	8.12112	0.00878992	merged_common_peaks	265.435	292.041
1	17004266	17007260	1501	-0.13773	8.5658	0.00616612	merged_common_peaks	361.27	397.46
1	17016585	17020688	2033	-0.01924	8.81465	0.0130314	merged_common_peaks	447.279	453.284
1	17023169	17030874	3848	0.02991	10.1633	0.00734624	merged_common_peaks	1158.65	1134.88
1	17035030	17050037	7499	0.04357	9.77225	0.00774448	merged_common_peaks	887.766	861.356
1	17070131	17074418	2107	0.01777	9.47129	0.010291	merged_common_peaks	714.195	705.452
1	17136102	17143303	3181	-0.10991	8.84748	0.00650803	merged_common_peaks	443.418	478.52
1	17144802	17145664	433	-0.00418	8.19662	0.0164451	merged_common_peaks	292.954	293.804
1	17151940	17152566	332	-0.04274	7.50779	0.0198904	merged_common_peaks	179.323	184.715
1	17194137	17197622	1707	-0.10114	8.82654	0.00753491	merged_common_peaks	438.359	470.193
1	17201576	17201997	204	-0.00222	7.77087	0.0190513	merged_common_peaks	218.238	218.574
1	17203680	17206157	1219	0.16878	9.00176	0.00203498	merged_common_peaks	543.505	483.499
1	17213954	17217346	1688	-0.02409	9.12149	0.011426	merged_common_peaks	552.352	561.653
1	17229927	17231476	940	-0.15839	7.8541	0.00944605	merged_common_peaks	219.018	244.433
1	17239892	17240653	382	0.01447	7.89009	0.0182374	merged_common_peaks	238.414	236.035
1	17254608	17265271	5389	0.0518	9.99858	0.00631156	merged_common_peaks	1041.52	1004.79
1	17267204	17267907	360	-0.00611	7.90016	0.0182377	merged_common_peaks	238.378	239.389
1	17278548	17280503	950	-0.56775	8.41029	2.76319e-08	merged_common_peaks	279.444	414.195
1	17288961	17290317	468	0.10922	8.047	0.0118837	merged_common_peaks	274.68	254.653
1	17294937	17295348	210	-0.18362	6.91822	0.0151226	merged_common_peaks	113.489	128.893
1	17299832	17300305	248	-0.11682	7.24254	0.0173411	merged_common_peaks	145.425	157.69
1	17312319	17318359	3028	-0.07401	9.1617	0.00795825	merged_common_peaks	558.222	587.606
1	17323981	17324744	380	-0.04345	7.85454	0.0175773	merged_common_peaks	227.988	234.959
1	17332566	17333294	373	-0.08391	7.64029	0.0171576	merged_common_peaks	193.788	205.393
1	17341611	17342527	445	-0.11323	8.29725	0.00968126	merged_common_peaks	302.467	327.163
1	17360884	17365568	2364	-0.02084	9.65067	0.00951186	merged_common_peaks	798.003	809.614
1	17369524	17369853	167	-0.00433	7.49317	0.0210115	merged_common_peaks	179.894	180.435
1	17405305	17413034	3133	0.01766	9.43526	0.0104092	merged_common_peaks	696.553	688.079
1	17414607	17415122	264	0.10747	7.98141	0.0124192	merged_common_peaks	262.313	243.483
1	17431075	17431779	351	0.06142	8.13384	0.0148014	merged_common_peaks	286.929	274.97
1	17448523	17449671	573	0.0787	7.94352	0.0151346	merged_common_peaks	252.978	239.548
1	17489344	17491159	947	0.05295	9.1735	0.00969798	merged_common_peaks	588.123	566.929
1	17502319	17503575	645	-0.06818	8.44988	0.0125574	merged_common_peaks	341.511	358.038
1	17515016	17515873	430	-0.1106	7.84089	0.0135929	merged_common_peaks	220.646	238.226
1	17520735	17525086	2175	-0.01198	9.8116	0.00928235	merged_common_peaks	894.917	902.379
1	17528615	17536164	3767	-0.02558	9.70822	0.00911823	merged_common_peaks	829.116	843.948
1	17543829	17544544	298	0.06468	7.98236	0.0153794	merged_common_peaks	258.622	247.283
1	17547202	17547829	333	0.01448	7.83272	0.0185904	merged_common_peaks	229.12	226.832
1	17551390	17552493	541	-0.06444	8.13196	0.0144854	merged_common_peaks	274.325	286.855
1	17570881	17571927	549	-0.03988	8.52606	0.0137199	merged_common_peaks	363.578	373.768
1	17573528	17576234	1335	-0.20688	8.94052	0.000983873	merged_common_peaks	457.326	527.841
1	17590123	17590717	342	-0.03814	7.91271	0.0174975	merged_common_peaks	237.806	244.176
1	17605656	17606031	176	-0.03502	7.2533	0.0224914	merged_common_peaks	150.727	154.43
1	17607986	17611787	1899	0.02243	9.61121	0.00963256	merged_common_peaks	788.204	776.044
1	17620710	17621960	646	0.34575	8.50367	8.28228e-05	merged_common_peaks	409.167	321.973
1	17624958	17627411	1223	-0.02903	9.44024	0.00997072	merged_common_peaks	687.743	701.722
1	17632498	17632904	207	0.15003	7.21179	0.0158542	merged_common_peaks	156.152	140.729
1	17655151	17660293	2575	0.11361	9.32751	0.00421008	merged_common_peaks	668.283	617.675
1	17664940	17666206	633	0.02911	7.66375	0.0194018	merged_common_peaks	204.833	200.741
1	17668090	17682232	7060	0.05025	9.52102	0.00826765	merged_common_peaks	747.612	722.02
1	17685663	17686218	264	-0.01663	7.39553	0.0216192	merged_common_peaks	167.407	169.348
1	17689588	17690717	568	-0.03967	9.1449	0.0105883	merged_common_peaks	558.365	573.932
1	17709567	17710474	470	0.10823	7.92612	0.0124809	merged_common_peaks	252.517	234.266
1	17713232	17714966	855	-0.00407	8.58166	0.0143909	merged_common_peaks	382.582	383.663
1	17759462	17761199	859	-0.09091	8.80129	0.0086086	merged_common_peaks	432.284	460.4
1	17812302	17813824	739	0.11938	9.21123	0.00421313	merged_common_peaks	617.767	568.706
1	17823709	17824980	456	-0.04251	7.79741	0.0178907	merged_common_peaks	219.208	225.763
1	17842349	17845287	1466	0.04886	9.78908	0.00735369	merged_common_peaks	899.831	869.866
1	17900364	17901464	552	-0.06331	8.36516	0.0133838	merged_common_peaks	322.578	337.049
1	17937030	17937949	439	0.05779	8.23783	0.0144054	merged_common_peaks	307.987	295.894
1	17961204	17961557	178	8e-05	7.22108	0.0230907	merged_common_peaks	149.202	149.193
1	18002146	18007391	2624	-0.02622	10.0123	0.00804366	merged_common_peaks	1023.43	1042.2
1	18012669	18020694	4146	-0.00368	10.419	0.00760125	merged_common_peaks	1367.32	1370.82
1	18053717	18054555	409	0.12295	8.13695	0.0100841	merged_common_peaks	293.746	269.749
1	18088504	18089581	534	-0.01344	8.58239	0.0143161	merged_common_peaks	381.535	385.106
1	18094498	18096112	805	-0.12198	8.52507	0.00765921	merged_common_peaks	353.136	384.292
1	18110869	18111338	245	0.12068	7.31031	0.0171634	merged_common_peaks	165.496	152.215
1	18154703	18165539	5441	-0.06928	9.98683	0.00502054	merged_common_peaks	990.621	1039.35
1	18192244	18192665	227	-0.00318	7.70844	0.0195012	merged_common_peaks	208.926	209.387
1	18214232	18214502	143	-0.12749	7.17888	0.0182748	merged_common_peaks	138.634	151.442
1	18269799	18271999	1103	0.00999	8.23696	0.0161725	merged_common_peaks	302.744	300.655
1	18300299	18304404	2009	-0.13	8.63748	0.00627241	merged_common_peaks	380.692	416.589
1	18338407	18339906	762	-0.07103	8.95652	0.00947088	merged_common_peaks	484.719	509.181
1	18380415	18381023	291	-0.04624	7.79241	0.0179266	merged_common_peaks	218.167	225.273
1	18386368	18387438	541	0.10736	8.77066	0.00751362	merged_common_peaks	453.306	420.797
1	18456850	18457453	297	-0.01993	7.79653	0.0187113	merged_common_peaks	220.795	223.867
1	18580254	18580808	214	0.14452	7.60729	0.012102	merged_common_peaks	205.01	185.468
1	18599604	18600487	435	-0.07244	8.57408	0.0113996	merged_common_peaks	371.665	390.804
1	18632166	18633846	834	-0.08837	9.06562	0.00755875	merged_common_peaks	519.664	552.49
1	18640820	18642202	696	0.1399	8.45223	0.00661264	merged_common_peaks	367.648	333.67
1	18652258	18652514	127	0.06779	7.3587	0.0199709	merged_common_peaks	168.032	160.319
1	18745184	18746722	707	-0.07761	8.73227	0.0100225	merged_common_peaks	413.994	436.874
1	18768022	18768621	383	-0.01583	7.4988	0.0208383	merged_common_peaks	179.879	181.864
1	18790533	18792363	903	-0.08874	8.73949	0.00890921	merged_common_peaks	414.469	440.763
1	18806700	18807326	333	-0.23384	7.80692	0.00446069	merged_common_peaks	206.5	242.836
1	18846384	18854858	4238	-0.04037	9.5129	0.00897445	merged_common_peaks	720.43	740.874
1	18894390	18895430	607	0.17185	8.3475	0.00487496	merged_common_peaks	345.712	306.889
1	18962065	18972068	4997	0.07031	10.0365	0.0046873	merged_common_peaks	1076.15	1024.96
1	18981014	18982200	619	-0.15201	8.22266	0.00693402	merged_common_peaks	283.392	314.881
1	19026864	19027972	558	0.05308	8.24254	0.0146721	merged_common_peaks	308.49	297.346
1	19054744	19056257	752	0.0072	8.22851	0.0162259	merged_common_peaks	300.685	299.188
1	19062382	19064110	875	-0.06839	8.7611	0.0107538	merged_common_peaks	423.702	444.271
1	19085644	19086694	545	-0.1679	8.3386	0.00514677	merged_common_peaks	305.42	343.115
1	19145876	19147813	956	-0.10167	8.85169	0.00728278	merged_common_peaks	445.986	478.55
1	19172182	19173435	644	-0.03372	8.58844	0.0136447	merged_common_peaks	380.454	389.452
1	19247925	19249082	581	-0.07172	7.85194	0.0158785	merged_common_peaks	225.359	236.845
1	19303916	19304201	133	0.05475	6.71226	0.0264738	merged_common_peaks	106.864	102.885
1	19317584	19319761	1104	-0.00978	8.4639	0.0149667	merged_common_peaks	351.897	354.291
1	19327751	19328750	495	-0.00433	8.15041	0.0167025	merged_common_peaks	283.704	284.557
1	19336277	19345649	4681	-0.03302	10.2405	0.00689662	merged_common_peaks	1195.97	1223.66
1	19374637	19380810	3088	0.02926	9.84143	0.00843987	merged_common_peaks	926.765	908.158
1	19403620	19404581	465	-0.08755	7.99513	0.0141595	merged_common_peaks	247.512	262.997
1	19465367	19466392	550	-0.15369	8.13447	0.00756062	merged_common_peaks	266.432	296.382
1	19577324	19577948	228	0.25502	7.4194	0.00582277	merged_common_peaks	187.002	156.703
1	19593122	19594004	413	-0.28617	8.00879	0.00141854	merged_common_peaks	233.245	284.419
1	19595745	19599807	2021	0.03679	9.39101	0.00977455	merged_common_peaks	680.007	662.885
1	19665878	19666613	357	-0.04221	7.76631	0.0183244	merged_common_peaks	214.555	220.925
1	19675503	19680385	2440	0.0336	9.96318	0.00781938	merged_common_peaks	1009.89	986.64
1	19705884	19706856	490	0.10329	7.78927	0.014205	merged_common_peaks	229.272	213.431
1	19725349	19729663	2158	-0.05612	9.22562	0.00924445	merged_common_peaks	587.14	610.429
1	19731856	19736300	2213	-0.13138	9.7868	0.00155321	merged_common_peaks	844.006	924.475
1	19741670	19742034	192	-0.21156	7.11289	0.0116657	merged_common_peaks	128.632	148.949
1	19768447	19769627	591	-0.09133	8.48266	0.010634	merged_common_peaks	346.568	369.217
1	19780474	19780989	257	0.08645	7.71375	0.0163962	merged_common_peaks	216.313	203.731
1	19808194	19809982	963	-0.01253	9.23381	0.0113245	merged_common_peaks	599.471	604.7
1	19909223	19909511	150	-0.04891	7.21447	0.0221793	merged_common_peaks	146.019	151.054
1	19943477	19945132	829	-0.04302	8.81806	0.0120879	merged_common_peaks	444.657	458.116
1	19993796	19995330	761	0.03871	8.85674	0.0119593	merged_common_peaks	469.863	457.423
1	20032740	20033628	537	0.49913	7.89359	1.42111e-05	merged_common_peaks	282.705	200.023
1	20085026	20090279	2627	0.0233	9.8144	0.00883038	merged_common_peaks	907.686	893.145
1	20112768	20113495	393	-0.14268	8.07226	0.00874266	merged_common_peaks	256.163	282.792
1	20125288	20126056	388	-0.10646	8.0429	0.0118892	merged_common_peaks	254.174	273.639
1	20166654	20167526	428	0.17419	7.67771	0.00976692	merged_common_peaks	217.49	192.754
1	20311930	20320608	4332	-0.01225	10.1582	0.00816262	merged_common_peaks	1137.85	1147.55
1	20329658	20331758	1043	-0.04483	8.59	0.0130908	merged_common_peaks	379.402	391.377
1	20333338	20334908	734	-0.21356	8.33158	0.00264024	merged_common_peaks	299.166	346.896
1	20423213	20423704	249	0.03766	7.85988	0.0178076	merged_common_peaks	235.357	229.293
1	20475630	20477874	1122	0.03288	9.29201	0.0104174	merged_common_peaks	634.049	619.762
1	20489007	20489875	377	0.02839	7.64944	0.0194942	merged_common_peaks	202.761	198.81
1	20509076	20509955	328	0.50611	7.8474	1.60843e-05	merged_common_peaks	274.461	193.253
1	20683346	20687550	2093	0.10906	9.34814	0.00440267	merged_common_peaks	676.84	627.56
1	20704042	20704342	136	0.06891	6.98733	0.0233027	merged_common_peaks	129.947	123.886
1	20709548	20711135	805	0.04959	9.32909	0.00921593	merged_common_peaks	654.335	632.225
1	20795139	20795690	300	-0.05655	7.93727	0.016269	merged_common_peaks	240.35	249.959
1	20824275	20827100	1410	-0.05077	9	0.0106417	merged_common_peaks	503.07	521.089
1	20914195	20915089	432	-0.19422	7.96698	0.00563523	merged_common_peaks	233.92	267.629
1	20972467	20974071	800	0.07828	8.61638	0.010752	merged_common_peaks	403.247	381.95
1	20979580	20982843	1636	0.03717	10.425	0.00601039	merged_common_peaks	1392.57	1357.15
1	21053693	21054703	506	0.03225	8.0295	0.0168624	merged_common_peaks	264.225	258.384
1	21081393	21081896	264	0.00057	7.61048	0.0201883	merged_common_peaks	195.465	195.388
1	21124682	21126165	738	0.12383	9.1163	0.00443059	merged_common_peaks	579.319	531.669
1	21210217	21211534	668	0.00344	8.62905	0.0141713	merged_common_peaks	396.388	395.444
1	21244305	21250015	2684	-0.01367	9.93168	0.00884101	merged_common_peaks	972.022	981.276
1	21260470	21260781	158	-0.05872	7.54045	0.0189708	merged_common_peaks	182.416	189.994
1	21282784	21283262	241	-0.12873	7.60716	0.0133382	merged_common_peaks	186.469	203.873
1	21335954	21336287	181	-0.1456	7.02079	0.016977	merged_common_peaks	123.468	136.579
1	21346154	21351286	2588	0.05431	10.0748	0.00581802	merged_common_peaks	1098.99	1058.39
1	21389988	21392914	1469	-0.13429	8.52061	0.00670815	merged_common_peaks	350.547	384.744
1	21399762	21400137	177	-0.07109	7.65697	0.0175319	merged_common_peaks	196.914	206.861
1	21401362	21401695	165	-0.07916	7.47024	0.0188833	merged_common_peaks	172.525	182.256
1	21450154	21457586	3712	-0.01719	9.83659	0.00902373	merged_common_peaks	908.911	919.805
1	21470289	21472226	986	0.08136	9.3191	0.00672198	merged_common_peaks	657.014	620.987
1	21524931	21529732	2402	0.0263	10.2732	0.00720583	merged_common_peaks	1248.79	1226.24
1	21602161	21602837	330	-0.25924	7.61371	0.00424041	merged_common_peaks	179.034	214.277
1	21608596	21609981	866	-0.13436	8.65883	0.006021	merged_common_peaks	385.784	423.439
1	21637520	21637938	199	0.05032	7.66065	0.0186512	merged_common_peaks	205.901	198.844
1	21681684	21683336	775	0.04479	8.57688	0.0131324	merged_common_peaks	387.829	375.973
1	21691454	21692630	668	-0.06091	8.24448	0.0140856	merged_common_peaks	296.939	309.745
1	21729826	21732022	1068	-0.05654	8.46564	0.0130529	merged_common_peaks	346.658	360.514
1	21739083	21739634	301	-0.08773	7.52562	0.017623	merged_common_peaks	178.744	189.951
1	21740551	21741880	663	-0.00341	8.46914	0.0149668	merged_common_peaks	353.958	354.796
1	21744265	21744947	319	0.01476	7.77955	0.018922	merged_common_peaks	220.851	218.603
1	21747128	21754887	3803	0.02316	10.1554	0.00771699	merged_common_peaks	1149.62	1131.31
1	21755590	21757122	796	-0.01797	7.90283	0.0180486	merged_common_peaks	237.84	240.821
1	21771939	21773347	713	0.0269	8.61943	0.013781	merged_common_peaks	396.968	389.635
1	21775566	21778141	1144	0.18274	8.86375	0.00202307	merged_common_peaks	496.318	437.27
1	21779091	21779566	225	0.06679	7.60461	0.0182202	merged_common_peaks	199.19	190.179
1	21788431	21789599	471	0.08747	8.0081	0.0141285	merged_common_peaks	265.365	249.754
1	21790743	21791094	173	0.07252	7.5286	0.018602	merged_common_peaks	189.343	180.061
1	21797521	21800674	1603	0.22433	9.08218	0.000435745	merged_common_peaks	585.833	501.468
1	21808171	21809660	743	0.06898	8.63185	0.0112823	merged_common_peaks	406.283	387.314
1	21811766	21814405	1223	0.08997	8.85949	0.00832505	merged_common_peaks	479.197	450.226
1	21815407	21815815	192	-0.02612	7.6004	0.0198282	merged_common_peaks	192.317	195.83
1	21824715	21825757	408	0.17685	8.13561	0.00603285	merged_common_peaks	299.007	264.511
1	21833775	21837038	1634	0.13432	9.07539	0.00381705	merged_common_peaks	565.173	514.929
1	21844467	21845947	728	0.04362	8.64063	0.0129014	merged_common_peaks	405.186	393.118
1	21848063	21849470	726	0.25593	8.57969	0.000709046	merged_common_peaks	418.086	350.125
1	21857789	21858630	395	-0.01018	8.01322	0.0174862	merged_common_peaks	257.447	259.27
1	21872679	21873917	621	0.04748	8.67815	0.0125713	merged_common_peaks	416.418	402.937
1	21991046	21992947	952	-0.05384	9.18289	0.00950253	merged_common_peaks	570.455	592.146
1	22059360	22062822	1736	-0.07612	9.65574	0.0057502	merged_common_peaks	785.616	828.18
1	22084396	22085333	512	0.15274	7.9901	0.0086457	merged_common_peaks	268.071	241.14
1	22100749	22106553	2891	-0.01158	9.84415	0.00914368	merged_common_peaks	915.464	922.842
1	22112102	22113088	563	-0.04862	8.04924	0.0160616	merged_common_peaks	260.462	269.39
1	22162912	22167943	2552	0.00313	9.43923	0.0106908	merged_common_peaks	694.964	693.458
1	22192021	22192447	221	0.0041	7.02484	0.0247176	merged_common_peaks	130.408	130.038
1	22224647	22224886	124	0.16441	6.73457	0.0194842	merged_common_peaks	112.734	100.592
1	22231245	22232643	661	0.07274	8.61909	0.0110327	merged_common_peaks	403.23	383.404
1	22261108	22261400	163	0.03436	7.14773	0.0229973	merged_common_peaks	143.5	140.123
1	22357047	22358006	473	0.05233	8.19654	0.0148497	merged_common_peaks	298.731	288.09
1	22450420	22451880	733	-0.09026	8.72418	0.00919945	merged_common_peaks	409.878	436.34
1	22620809	22621954	576	-0.05693	8.53238	0.0125894	merged_common_peaks	363.022	377.634
1	22693958	22699403	2715	-0.002	10.1206	0.00845092	merged_common_peaks	1112.5	1114.04
1	22743117	22743413	149	0.08254	7.23514	0.0200917	merged_common_peaks	155.031	146.41
1	22778265	22778506	114	0.10088	7.1768	0.0197107	merged_common_peaks	149.836	139.717
1	22779806	22780092	145	-0.06526	7.23784	0.0216145	merged_common_peaks	147.565	154.394
1	22795701	22796034	177	0.08122	7.36989	0.0193947	merged_common_peaks	170.131	160.817
1	22872165	22873337	533	-0.00633	8.73593	0.0136315	merged_common_peaks	425.426	427.297
1	22992166	22993668	736	0.10116	8.93147	0.00682032	merged_common_peaks	505.669	471.427
1	23096704	23097278	305	-0.28043	7.65711	0.00303501	merged_common_peaks	183.152	222.448
1	23118221	23123251	2510	-0.09858	10.1291	0.00224532	merged_common_peaks	1082.28	1158.82
1	23152535	23153226	338	0.13477	7.93071	0.0105079	merged_common_peaks	255.662	232.861
1	23174204	23175025	423	0.0145	8.51559	0.0145803	merged_common_peaks	367.816	364.138
1	23212045	23212587	275	-0.10592	7.71146	0.0149001	merged_common_peaks	202.04	217.432
1	23214097	23215398	667	-0.0253	8.50875	0.0144202	merged_common_peaks	361.061	367.449
1	23240230	23242939	1349	0.0024	10.0144	0.0087632	merged_common_peaks	1035.15	1033.43
1	23280476	23281682	601	0.11597	8.86805	0.00627631	merged_common_peaks	486.412	448.842
1	23295713	23297178	743	0.09507	9.26503	0.00574582	merged_common_peaks	635.86	595.309
1	23434843	23435985	575	-0.06926	8.88594	0.00980476	merged_common_peaks	461.859	484.573
1	23553766	23554102	174	0.21776	6.86725	0.0130665	merged_common_peaks	125.9	108.261
1	23566408	23569490	1595	0.06107	9.83209	0.00615699	merged_common_peaks	930.992	892.405
1	23710423	23711062	312	0.00335	7.95666	0.0178681	merged_common_peaks	248.712	248.136
1	23723633	23723978	155	0.25323	7.02482	0.00897785	merged_common_peaks	142.166	119.28
1	23876464	23877024	204	-0.15193	7.40223	0.0134429	merged_common_peaks	160.482	178.304
1	23925408	23932431	3511	-0.02912	9.79964	0.0086285	merged_common_peaks	882.272	900.261
1	23940231	23940631	246	-0.122	7.23989	0.0173411	merged_common_peaks	144.898	157.684
1	23965470	23966225	367	-0.13541	8.11994	0.00878992	merged_common_peaks	265.439	291.559
1	24027190	24027699	257	-0.06433	7.45864	0.019407	merged_common_peaks	172.025	179.869
1	24082367	24082740	189	0.06378	7.36957	0.0203525	merged_common_peaks	169.068	161.757
1	24272096	24277360	2632	-0.09109	9.54576	0.00492974	merged_common_peaks	724.185	771.384
1	24350810	24353587	1387	-0.08797	9.21866	0.00671042	merged_common_peaks	577.9	614.234
1	24428868	24429305	218	-0.03747	7.59815	0.0196238	merged_common_peaks	191.263	196.296
1	24438090	24438357	130	-0.30276	6.89426	0.00699432	merged_common_peaks	107.105	132.114
1	24455747	24458236	1268	-0.00191	9.33297	0.0111053	merged_common_peaks	644.49	645.344
1	24605313	24606451	581	0.13046	8.47877	0.00729145	merged_common_peaks	373.25	340.979
1	24718504	24718937	259	0.09518	7.13882	0.0198909	merged_common_peaks	145.655	136.356
1	24741301	24742102	397	0.2313	7.45092	0.00643503	merged_common_peaks	189.568	161.487
1	24831663	24832651	450	0.09194	8.1672	0.0121554	merged_common_peaks	296.764	278.441
1	24838138	24838881	374	0.06155	8.14408	0.0147624	merged_common_peaks	288.986	276.916
1	24907712	24908702	499	-0.11574	8.43146	0.00895774	merged_common_peaks	331.667	359.371
1	24917727	24918495	382	-0.15516	7.99478	0.00865294	merged_common_peaks	241.721	269.167
1	25056794	25058155	680	-0.03723	8.47942	0.0139167	merged_common_peaks	352.335	361.546
1	25095856	25096847	495	0.0561	8.79087	0.0111621	merged_common_peaks	451.606	434.382
1	25097791	25098822	530	-0.10936	8.38079	0.00967092	merged_common_peaks	320.929	346.202
1	25159034	25163426	2191	-0.061	9.96373	0.00574016	merged_common_peaks	977.688	1019.91
1	25180244	25181129	444	0.11478	7.62548	0.0150983	merged_common_peaks	205.482	189.768
1	25266056	25266426	185	0.16261	7.4115	0.0127317	merged_common_peaks	180.119	160.919
1	25343485	25343916	203	0.29458	7.30036	0.00402785	merged_common_peaks	174.569	142.327
1	25357835	25358271	209	0.28696	7.3631	0.00423861	merged_common_peaks	181.847	149.047
1	25400491	25401478	501	0.05024	7.97498	0.0164063	merged_common_peaks	256.018	247.256
1	25449639	25450152	260	-0.07042	8.29091	0.0133136	merged_common_peaks	305.642	320.931
1	25639726	25641921	1098	0.00441	10.0307	0.00868795	merged_common_peaks	1047.65	1044.46
1	25696912	25698133	603	0.17976	8.30019	0.00476206	merged_common_peaks	335.477	296.176
1	25722568	25723311	373	-0.05407	7.71535	0.0180308	merged_common_peaks	206.259	214.136
1	25751159	25751907	386	-0.07387	7.72142	0.0168077	merged_common_peaks	205.712	216.52
1	26169611	26171067	781	-0.02202	8.85487	0.0126618	merged_common_peaks	459.481	466.547
1	26196288	26197292	503	0.04629	8.78095	0.0120291	merged_common_peaks	446.989	432.875
1	26307017	26307410	194	-0.06405	7.09248	0.0220594	merged_common_peaks	133.478	139.537
1	26366682	26371683	2493	0.06146	10.3343	0.00437099	merged_common_peaks	1318.77	1263.77
1	26374484	26375380	443	0.05388	8.14269	0.0150754	merged_common_peaks	287.941	277.386
1	26551809	26552081	137	0.04401	7.04524	0.0238005	merged_common_peaks	134.107	130.078
1	26779409	26781134	868	0.02803	8.67346	0.0134252	merged_common_peaks	412.278	404.346
1	26880359	26883410	1527	0.0746	8.9299	0.00927314	merged_common_peaks	500.491	475.269
1	27066866	27068889	998	-0.07487	9.23231	0.00771519	merged_common_peaks	586.048	617.264
1	27240823	27241139	151	-0.08419	6.86957	0.0241307	merged_common_peaks	113.573	120.398
1	27515070	27516422	680	0.02984	8.49802	0.0143382	merged_common_peaks	365.301	357.822
1	27635373	27636701	653	0.26368	8.55101	0.000615618	merged_common_peaks	410.959	342.312
1	27859724	27860703	503	-0.05118	8.37969	0.0138716	merged_common_peaks	327.216	339.033
1	27972092	27972877	391	-0.05354	7.51725	0.01947	merged_common_peaks	179.829	186.628
1	28161292	28162165	456	-0.03452	8.02224	0.0168925	merged_common_peaks	256.885	263.106
1	28311448	28312395	481	0.01884	8.34092	0.015474	merged_common_peaks	326.364	322.13
1	28332072	28333368	662	-0.07226	8.31819	0.0129219	merged_common_peaks	311.278	327.266
1	28397763	28398549	392	-0.00704	8.31452	0.0157881	merged_common_peaks	317.585	319.139
1	28470426	28471171	418	-1.06399	7.71111	8.69883e-15	merged_common_peaks	144.92	302.986
1	28515341	28515974	283	0.05966	7.37602	0.0203003	merged_common_peaks	169.583	162.713
1	28526973	28527664	354	0.03899	8.15768	0.0159882	merged_common_peaks	289.451	281.733
1	28702914	28703958	515	0.06332	8.67921	0.0114332	merged_common_peaks	419.018	401.025
1	28827374	28828380	489	0.03399	8.41281	0.0145717	merged_common_peaks	344.845	336.816
1	28912945	28913591	313	0.09666	7.84988	0.0140691	merged_common_peaks	238.56	223.101
1	29078467	29078844	192	-0.03111	7.29074	0.0222109	merged_common_peaks	154.899	158.276
1	29244224	29244575	162	-0.06405	6.79151	0.0253377	merged_common_peaks	108.345	113.263
1	29263353	29263828	227	0.18072	7.62203	0.0091073	merged_common_peaks	209.73	185.037
1	29319417	29320403	466	-0.02541	8.57076	0.0139995	merged_common_peaks	376.904	383.602
1	29377072	29380701	1814	-0.00249	10.0334	0.00870459	merged_common_peaks	1047.1	1048.91
1	29474555	29481333	3217	-0.02939	9.78907	0.00865237	merged_common_peaks	875.75	893.773
1	29611591	29612335	347	0.16142	7.72792	0.00982916	merged_common_peaks	224.198	200.465
1	29983582	29984500	457	-0.05854	8.36968	0.0133696	merged_common_peaks	324.126	337.548
1	30251183	30255149	1979	0.0128	9.08346	0.0119701	merged_common_peaks	544.905	540.091
Mt	1	366924	183463	-0.05448	9.6219	0.00755316	merged_common_peaks	773.18	802.935
3	422679	423242	287	0.08341	7.4791	0.0178183	merged_common_peaks	183.649	173.332
3	525244	526027	390	0.05209	8.05314	0.016036	merged_common_peaks	270.444	260.853
3	557596	558166	286	-0.07977	7.88856	0.0153189	merged_common_peaks	230.508	243.613
3	1170239	1171123	443	0.08634	8.57731	0.0102083	merged_common_peaks	393.571	370.708
3	1283425	1283722	146	0.14963	7.23112	0.0158277	merged_common_peaks	158.236	142.647
3	1369896	1370831	475	-0.08801	8.35878	0.0114833	merged_common_peaks	318.417	338.447
3	1555670	1560492	2438	0.17318	9.97408	0.000234834	merged_common_peaks	1067.98	947.177
3	1602269	1602944	357	0.08341	7.4791	0.0178183	merged_common_peaks	183.649	173.332
3	1962999	1969932	3451	0.26624	9.72471	7.49123e-06	merged_common_peaks	927.903	771.536
3	2251276	2251518	122	0.19657	6.77807	0.0172383	merged_common_peaks	117.487	102.522
3	2258809	2261019	1106	0.05511	10.3818	0.00474402	merged_common_peaks	1359.97	1309
3	2360892	2362607	873	-0.13537	9.28781	0.00280689	merged_common_peaks	596.395	655.065
3	2628629	2629746	562	-0.1422	8.88626	0.00404039	merged_common_peaks	450.43	497.089
3	2772782	2773672	444	-0.02029	7.87232	0.0182362	merged_common_peaks	232.675	235.971
3	2808420	2818909	5242	0.03548	10.1661	0.00701673	merged_common_peaks	1163.19	1134.93
3	2921661	2923281	812	0.06431	9.62706	0.00665955	merged_common_peaks	808.562	773.311
3	2970706	2971395	347	0.18786	7.6847	0.00812893	merged_common_peaks	219.584	192.774
3	3080050	3080520	225	-0.0654	7.3458	0.0205113	merged_common_peaks	159.024	166.399
3	3120228	3121145	432	0.06794	7.81629	0.0164227	merged_common_peaks	230.762	220.146
3	3423522	3424682	578	0.16461	9.13982	0.00193838	merged_common_peaks	597.223	532.824
3	3497522	3497935	203	0.15568	7.60547	0.0114852	merged_common_peaks	205.545	184.52
3	3807043	3813143	3032	0.0249	10.2371	0.0074736	merged_common_peaks	1217.41	1196.58
3	3837539	3838843	650	0.05185	8.04223	0.0160874	merged_common_peaks	268.384	258.91
3	3965195	3965691	242	0.09341	7.74107	0.0153358	merged_common_peaks	220.98	207.126
3	4276921	4280823	1949	0.11044	9.28364	0.00448798	merged_common_peaks	647.555	599.834
3	4284135	4288296	1865	0.09747	8.5849	0.00927183	merged_common_peaks	397.176	371.229
3	4341556	4342146	284	-0.00018	7.94637	0.0179402	merged_common_peaks	246.643	246.674
3	4454094	4456093	1017	0.08348	9.37883	0.00635792	merged_common_peaks	685.29	646.761
3	4551509	4552199	343	0.04059	7.68344	0.0190787	merged_common_peaks	208.476	202.692
3	4579123	4579562	194	-0.03056	7.38431	0.0212981	merged_common_peaks	165.31	168.849
3	4726767	4729862	1554	-0.27811	8.95438	0.000123398	merged_common_peaks	450.482	546.257
3	4796159	4796568	204	-0.05335	7.68943	0.0184914	merged_common_peaks	202.637	210.271
3	4927658	4932287	2320	0.00918	10.0373	0.00860168	merged_common_peaks	1054.18	1047.5
3	5152198	5156444	2128	0.05359	9.45986	0.00836266	merged_common_peaks	717.41	691.251
3	5278008	5286721	4358	0.03387	9.88446	0.00807313	merged_common_peaks	956.35	934.159
3	5379219	5379954	366	0.1529	7.92184	0.00903245	merged_common_peaks	255.697	229.984
3	5622482	5623947	735	0.09879	9.0279	0.00663894	merged_common_peaks	540.179	504.428
3	5651193	5652490	653	-0.0741	8.9367	0.00926286	merged_common_peaks	477.597	502.768
3	5728255	5729638	684	0.03158	8.91536	0.0121858	merged_common_peaks	488.14	477.571
3	5743986	5745574	801	-0.00509	8.84978	0.0131207	merged_common_peaks	460.557	462.184
3	5792706	5793386	348	-0.04322	7.88992	0.0173772	merged_common_peaks	233.667	240.773
3	5835193	5835549	179	0.25138	7.10818	0.00777015	merged_common_peaks	150.526	126.456
3	5839336	5840215	445	0.0871	8.5332	0.0102569	merged_common_peaks	381.82	359.451
3	5867312	5868265	461	0.03971	8.27995	0.0151891	merged_common_peaks	315.13	306.575
3	5929420	5931185	884	0.0598	9.8021	0.00643533	merged_common_peaks	911.438	874.431
3	6053710	6054582	435	-0.04688	7.54284	0.0193336	merged_common_peaks	183.47	189.53
3	6073322	6073664	169	0.20871	7.20696	0.0102496	merged_common_peaks	158.827	137.435
3	6293915	6295162	625	-0.06948	8.78741	0.0102045	merged_common_peaks	431.337	452.618
3	6486341	6487289	484	0.01023	8.72437	0.0136472	merged_common_peaks	424.46	421.461
3	6576250	6577236	496	-0.08298	7.5022	0.01772	merged_common_peaks	176.156	186.585
3	6728823	6729439	315	-0.13118	7.65955	0.0126989	merged_common_peaks	193.201	211.592
3	6771569	6771920	183	0.07056	6.89037	0.0239582	merged_common_peaks	121.571	115.768
3	6941286	6941982	351	0.05017	7.86323	0.0172474	merged_common_peaks	236.93	228.832
3	6990369	6992469	1024	-0.08284	8.92088	0.00855185	merged_common_peaks	470.96	498.794
3	7234050	7237119	1545	0.05229	9.75652	0.00713444	merged_common_peaks	880.797	849.444
3	7279200	7279862	340	0.07729	7.79547	0.0160953	merged_common_peaks	228.194	216.29
3	7318493	7319202	337	0.01371	7.46337	0.0211886	merged_common_peaks	177.322	175.645
3	7342516	7344301	895	-0.09018	9.41407	0.00548641	merged_common_peaks	661.217	703.867
3	7659084	7659454	191	-0.0883	7.1759	0.0203903	merged_common_peaks	140.24	149.091
3	7713581	7714674	482	0.35257	8.41677	8.96661e-05	merged_common_peaks	386.16	302.436
3	7765399	7766887	843	0.11546	8.60547	0.00771605	merged_common_peaks	405.399	374.219
3	7800401	7800890	246	0.09055	7.40877	0.0186708	merged_common_peaks	175.344	164.677
3	7803767	7807369	1805	0.04679	10.5462	0.00488318	merged_common_peaks	1519.68	1471.19
3	7849680	7851853	1085	0.05725	9.03461	0.00998185	merged_common_peaks	534.941	514.128
3	7859691	7860958	665	0.16718	8.72345	0.0033241	merged_common_peaks	447.902	398.894
3	7921300	7922406	642	0.12035	8.13823	0.0100841	merged_common_peaks	293.742	270.232
3	7937106	7937441	167	-0.00661	7.08678	0.0241672	merged_common_peaks	135.625	136.247
3	7978892	7980407	757	-0.00808	8.08807	0.017034	merged_common_peaks	271.354	272.878
3	7995014	7996153	557	-0.09953	8.44562	0.00999666	merged_common_peaks	336.825	360.882
3	8002247	8003653	706	0.01151	9.08543	0.0120143	merged_common_peaks	545.405	541.071
3	8026652	8027119	271	-0.00982	7.71169	0.0194548	merged_common_peaks	208.916	210.343
3	8093654	8095887	1131	-0.13716	9.12699	0.0034008	merged_common_peaks	533.155	586.33
3	8101090	8102745	829	-0.00212	9.72955	0.00966865	merged_common_peaks	848.335	849.582
3	8130235	8133070	1398	-0.08557	9.54206	0.00539925	merged_common_peaks	723.714	767.937
3	8209635	8211943	971	-0.22274	9.15093	0.00039547	merged_common_peaks	526.234	614.087
3	8231499	8233281	886	-0.03878	8.75698	0.0126455	merged_common_peaks	426.851	438.481
3	8247858	8248370	305	-0.08017	7.39947	0.0187097	merged_common_peaks	164.208	173.592
3	8374193	8374697	240	0.05141	7.79829	0.0175755	merged_common_peaks	226.599	218.666
3	8492125	8493463	674	0.06385	8.12227	0.0148408	merged_common_peaks	284.877	272.544
3	8526574	8527837	572	0.2212	8.04529	0.00383392	merged_common_peaks	285.212	244.669
3	8537308	8543575	3162	0.03666	9.69858	0.00845919	merged_common_peaks	841.553	820.438
3	8644780	8645246	232	-0.13682	7.64676	0.0127056	merged_common_peaks	191.122	210.135
3	8752171	8752991	401	0.00015	7.70681	0.0195012	merged_common_peaks	208.931	208.91
3	8789604	8790472	409	0.03169	8.32325	0.0151613	merged_common_peaks	323.83	316.795
3	8842939	8858279	7666	0.03695	9.91506	0.00772172	merged_common_peaks	977.894	953.167
3	8872605	8873299	341	-0.04283	7.65449	0.0192553	merged_common_peaks	198.511	204.493
3	8874571	8875532	466	0.05809	8.26389	0.014019	merged_common_peaks	313.633	301.256
3	8883344	8883820	268	-0.0769	7.54935	0.0180414	merged_common_peaks	182.392	192.378
3	8937139	8938480	659	0.0306	8.62133	0.0136425	merged_common_peaks	398.001	389.649
3	8956304	8957335	553	-0.11654	8.42516	0.00860602	merged_common_peaks	330.13	357.904
3	8976973	8978132	574	0.13732	8.73806	0.00510748	merged_common_peaks	447.803	407.145
3	9011498	9017185	2854	-0.00255	9.94981	0.0089599	merged_common_peaks	988.115	989.863
3	9185281	9187084	643	-0.44446	8.50029	2.74044e-06	merged_common_peaks	310.416	422.416
3	9226677	9232717	3005	-0.09789	9.69742	0.00381037	merged_common_peaks	802.565	858.911
3	9236834	9241036	2102	-0.01223	9.79219	0.00934322	merged_common_peaks	882.881	890.397
3	9256418	9257647	604	-0.10643	8.35145	0.0100451	merged_common_peaks	314.788	338.888
3	9322143	9322567	200	-0.04685	7.71904	0.0183356	merged_common_peaks	207.306	214.148
3	9331687	9332028	197	-0.11052	7.36788	0.0169865	merged_common_peaks	158.971	171.628
3	9361801	9363139	477	-0.2108	7.95589	0.00487096	merged_common_peaks	230.798	267.11
3	9378731	9381438	1361	0.11437	9.54584	0.00309766	merged_common_peaks	777.676	718.406
3	9384210	9385827	803	-0.05958	9.05434	0.00974194	merged_common_peaks	520.787	542.745
3	9387965	9393936	2963	0.01233	9.72333	0.00956061	merged_common_peaks	848.926	841.702
3	9435170	9437578	1238	-0.33727	9.08072	7.36772e-06	merged_common_peaks	481.731	608.602
3	9443363	9446009	1590	-0.389	8.98237	1.24842e-06	merged_common_peaks	441.99	578.779
3	9471216	9472092	427	0.15657	8.51266	0.00494629	merged_common_peaks	385.596	345.939
3	9540530	9541252	341	-0.02765	7.62429	0.019683	merged_common_peaks	195.424	199.206
3	9558280	9559404	568	-0.109	8.87001	0.00678064	merged_common_peaks	450.54	485.898
3	9608051	9610511	1226	0.06244	9.81738	0.00616194	merged_common_peaks	921.985	882.933
3	9613385	9625418	6039	0.00227	9.75863	0.00957906	merged_common_peaks	866.926	865.563
3	9664576	9665297	364	-0.15617	7.95471	0.00859975	merged_common_peaks	235.018	261.886
3	9682329	9682609	146	0.08722	7.02971	0.0218019	merged_common_peaks	134.673	126.773
3	9692257	9697917	2827	0.01043	10.3722	0.00763013	merged_common_peaks	1330.21	1320.62
3	9723863	9736213	6175	0.00813	10.2797	0.00792049	merged_common_peaks	1246.63	1239.62
3	9766774	9767730	389	-0.0661	7.98464	0.0157205	merged_common_peaks	247.552	259.158
3	9783831	9788305	2230	0.07422	10.2994	0.00343766	merged_common_peaks	1293.04	1228.2
3	9808126	9809183	522	0.12823	8.56985	0.00676694	merged_common_peaks	397.267	363.481
3	9861740	9863545	900	-0.01143	8.92282	0.0127009	merged_common_peaks	483.411	487.256
3	9890579	9890861	144	0.06338	7.11239	0.0224822	merged_common_peaks	141.443	135.364
3	9899619	9901589	888	-0.22824	8.72182	0.000968599	merged_common_peaks	390.1	456.965
3	9974941	9976149	592	0.25785	8.44773	0.000888232	merged_common_peaks	381.795	319.308
3	9977009	9977762	334	0.23994	7.79222	0.00406617	merged_common_peaks	240.883	203.975
3	10004675	10008637	1972	0.0516	9.27131	0.00932922	merged_common_peaks	629.085	606.982
3	10031254	10031886	374	0.12702	7.54094	0.0140253	merged_common_peaks	194.611	178.209
3	10066189	10066874	343	0.06599	7.7203	0.0172447	merged_common_peaks	215.762	206.115
3	10082028	10082416	196	-0.01745	7.18874	0.0231677	merged_common_peaks	145.011	146.775
3	10106003	10111473	2719	-0.02235	10.0952	0.00798462	merged_common_peaks	1085.4	1102.34
3	10114184	10114512	153	-0.11867	7.47648	0.0154084	merged_common_peaks	170.916	185.569
3	10166885	10168763	939	0.00484	8.76629	0.013506	merged_common_peaks	436.159	434.698
3	10176706	10177894	569	-0.04226	8.24033	0.0151645	merged_common_peaks	298.007	306.865
3	10190758	10191103	153	-0.00427	6.99379	0.0249096	merged_common_peaks	127.262	127.639
3	10201076	10202345	831	-0.25055	7.84368	0.00328865	merged_common_peaks	210.606	250.55
3	10222380	10225474	1522	-0.12784	9.32508	0.00328424	merged_common_peaks	613.602	670.457
3	10262347	10263921	791	-0.0629	9.08379	0.00928581	merged_common_peaks	530.916	554.575
3	10293223	10294994	854	-0.04776	9.20277	0.00996841	merged_common_peaks	579.59	599.099
3	10300633	10302175	756	-0.14764	8.6403	0.00493197	merged_common_peaks	379.112	419.963
3	10320749	10321141	206	0.13976	7.25014	0.0158006	merged_common_peaks	159.789	145.035
3	10339751	10345649	2962	0.04673	10.0993	0.00633907	merged_common_peaks	1114.9	1079.37
3	10403044	10407081	1991	-0.04655	9.22466	0.00991597	merged_common_peaks	588.698	608.003
3	10414078	10415133	532	-0.10692	8.31118	0.0100603	merged_common_peaks	306.07	329.615
3	10416892	10417663	322	-0.04868	7.80042	0.0175755	merged_common_peaks	219.196	226.719
3	10440765	10441967	612	-0.11091	8.70712	0.00748085	merged_common_peaks	402.171	434.308
3	10460960	10464846	1940	0.05767	9.81657	0.00655856	merged_common_peaks	919.946	883.897
3	10476500	10484170	3807	-0.02085	9.99624	0.00835255	merged_common_peaks	1013.98	1028.74
3	10493061	10493538	230	-0.33681	7.39094	0.00203638	merged_common_peaks	149.348	188.621
3	10509582	10511586	1007	-0.05898	8.77544	0.0112023	merged_common_peaks	429.332	447.248
3	10514154	10514699	201	0.12805	7.46539	0.0147726	merged_common_peaks	184.748	169.057
3	10530836	10532135	660	0.049	9.03591	0.0105504	merged_common_peaks	533.894	516.065
3	10546069	10546985	453	-0.11928	8.16149	0.0105067	merged_common_peaks	274.726	298.405
3	10552542	10552841	140	-0.07278	7.48867	0.0188017	merged_common_peaks	175.13	184.191
3	10559132	10562460	1668	-0.07739	9.05178	0.00846395	merged_common_peaks	516.665	545.137
3	10564332	10565243	449	0.08198	8.10294	0.0134781	merged_common_peaks	282.857	267.232
3	10570786	10571073	139	-0.13606	7.3709	0.0148941	merged_common_peaks	157.9	173.517
3	10574849	10575129	143	0.00781	7.55234	0.0205602	merged_common_peaks	188.216	187.2
3	10635921	10638595	1345	-0.19982	8.65021	0.00200954	merged_common_peaks	374.884	430.575
3	10640967	10641997	520	-0.04356	7.98259	0.0166421	merged_common_peaks	249.14	256.777
3	10643810	10646030	1116	-0.22299	8.93228	0.000668914	merged_common_peaks	452.19	527.773
3	10681393	10681933	276	0.00839	7.78267	0.018965	merged_common_peaks	220.841	219.561
3	10700851	10703609	1344	-0.05712	8.9482	0.0103655	merged_common_peaks	484.261	503.818
3	10717888	10718341	208	0.27351	7.44209	0.00449309	merged_common_peaks	191.188	158.17
3	10719315	10719897	250	-0.07563	7.67804	0.0170095	merged_common_peaks	199.497	210.234
3	10751216	10753058	732	0.0868	8.55062	0.0105504	merged_common_peaks	386.418	363.855
3	10758033	10758531	249	0.00681	7.30574	0.022354	merged_common_peaks	158.589	157.842
3	10762908	10765056	1058	0.05807	8.26154	0.0143153	merged_common_peaks	313.121	300.768
3	10806481	10807568	577	0.08968	8.13032	0.0130183	merged_common_peaks	289.047	271.626
3	10810305	10813158	1431	0.04501	9.33688	0.00950132	merged_common_peaks	656.834	636.658
3	10816628	10818753	1147	-0.05437	8.85947	0.0112022	merged_common_peaks	455.809	473.314
3	10819920	10820840	434	-0.08867	7.96225	0.0142532	merged_common_peaks	241.841	257.171
3	10825766	10826261	196	-0.17886	7.7059	0.00869961	merged_common_peaks	196.239	222.141
3	10834771	10835521	359	-0.2638	7.52094	0.00475485	merged_common_peaks	167.619	201.249
3	10862788	10865888	1536	-0.13095	9.13623	0.00374949	merged_common_peaks	537.736	588.829
3	10884318	10891930	3804	0.01404	10.0329	0.00850761	merged_common_peaks	1052.72	1042.53
3	10901360	10902190	422	0.03783	7.37336	0.021359	merged_common_peaks	167.995	163.647
3	10904754	10905970	462	0.11099	7.93943	0.0124675	merged_common_peaks	255.101	236.211
3	10917617	10922996	2683	0.04075	9.99077	0.00719243	merged_common_peaks	1031.94	1003.2
3	10927634	10933391	2877	-0.02042	9.41579	0.0104045	merged_common_peaks	678.206	687.874
3	10937669	10938246	278	0.00961	7.85769	0.018431	merged_common_peaks	232.727	231.182
3	10946168	10947150	499	-0.01268	8.13872	0.0167317	merged_common_peaks	280.602	283.079
3	10952913	10954464	785	-0.02745	8.47464	0.0144503	merged_common_peaks	352.362	359.131
3	10970142	10976027	2944	0.03981	10.2381	0.00638934	merged_common_peaks	1224.52	1191.19
3	10978000	10980064	1056	0.01445	9.02513	0.0121444	merged_common_peaks	523.612	518.394
3	10990590	10991174	286	0.0829	7.24944	0.0199947	merged_common_peaks	156.595	147.85
3	10997422	10998541	520	-0.15711	7.89702	0.00900253	merged_common_peaks	225.732	251.702
3	10999364	11000475	659	-0.05153	7.70685	0.0180673	merged_common_peaks	205.228	212.691
3	11016056	11020885	2410	-0.05141	9.84856	0.00691426	merged_common_peaks	905.678	938.534
3	11021788	11022638	430	0.05383	8.29403	0.0141919	merged_common_peaks	319.782	308.07
3	11036390	11036760	157	0.37389	7.06318	0.00249834	merged_common_peaks	152.232	117.477
3	11053922	11063081	4641	-0.01365	10.4096	0.00741351	merged_common_peaks	1353.82	1366.68
3	11064457	11071391	3474	-0.00075	10.1322	0.00841699	merged_common_peaks	1121.99	1122.57
3	11078984	11079523	286	0.05548	7.71154	0.0180308	merged_common_peaks	213.676	205.615
3	11086513	11087493	583	-0.17451	7.79939	0.00835508	merged_common_peaks	209.693	236.656
3	11089275	11091065	881	0.0599	8.62355	0.0118247	merged_common_peaks	402.683	386.306
3	11098608	11099552	461	0.07882	8.35178	0.0121767	merged_common_peaks	335.738	317.887
3	11104378	11104939	344	0.12933	7.35515	0.0163395	merged_common_peaks	171.233	156.551
3	11112316	11112760	206	-0.00357	7.65397	0.0198358	merged_common_peaks	201.158	201.656
3	11115401	11120704	2639	-0.00705	9.9277	0.00900072	merged_common_peaks	971.571	976.33
3	11132422	11132896	240	0.11995	7.45713	0.0160964	merged_common_peaks	183.178	168.564
3	11133769	11134313	263	-0.219	7.69476	0.00571932	merged_common_peaks	192.04	223.52
3	11141598	11147883	3148	-0.00724	10.059	0.00858657	merged_common_peaks	1064.04	1069.4
3	11152863	11153124	132	0.00809	7.26183	0.0227134	merged_common_peaks	153.903	153.042
3	11157971	11158859	440	0.16721	8.12537	0.00676154	merged_common_peaks	295.902	263.519
3	11170111	11187928	8910	-0.01716	9.78968	0.00921724	merged_common_peaks	879.842	890.369
3	11196423	11198069	802	-0.18821	8.66597	0.00249554	merged_common_peaks	380.53	433.556
3	11200044	11200547	279	-0.20441	7.41381	0.00930309	merged_common_peaks	158.859	183.04
3	11205064	11206462	687	0.16079	8.66963	0.00382148	merged_common_peaks	430.546	385.139
3	11220873	11221148	128	0.15413	7.41147	0.0127317	merged_common_peaks	179.586	161.39
3	11223369	11233720	5119	-0.04741	8.6797	0.0123603	merged_common_peaks	403.38	416.856
3	11244578	11245380	390	-0.10094	7.91178	0.0139331	merged_common_peaks	232.536	249.388
3	11295275	11296708	729	-0.09994	8.40581	0.0103718	merged_common_peaks	327.611	351.11
3	11316995	11318052	533	-0.06983	8.10453	0.0145764	merged_common_peaks	268.656	281.979
3	11319208	11327483	4144	-0.05684	9.23341	0.00905111	merged_common_peaks	590.171	613.887
3	11328609	11344561	7928	0.05802	9.7838	0.00671299	merged_common_peaks	899.394	863.942
3	11348277	11357821	4774	0.04681	9.63473	0.00808864	merged_common_peaks	807.957	782.163
3	11363855	11364845	500	0.01263	8.51851	0.0146402	merged_common_peaks	368.322	365.112
3	11366077	11366418	185	-0.10852	7.40877	0.0175039	merged_common_peaks	163.655	176.44
3	11368594	11375262	2714	0.07702	9.01395	0.00849255	merged_common_peaks	530.96	503.358
3	11376419	11380558	2071	-0.14625	9.4126	0.00188845	merged_common_peaks	647.832	716.948
3	11387780	11394332	3274	0.03117	10.0361	0.00775755	merged_common_peaks	1061.35	1038.67
3	11396541	11397125	261	-0.03186	7.37126	0.0216163	merged_common_peaks	163.748	167.404
3	11403202	11431250	13962	-0.04238	9.71993	0.0080702	merged_common_peaks	831.02	855.794
3	11432252	11439137	3741	0.14236	8.31628	0.0070828	merged_common_peaks	334.871	303.405
3	11441179	11444848	2274	-0.08184	8.43697	0.0113522	merged_common_peaks	336.87	356.533
3	11449814	11453040	1062	-0.22941	8.53308	0.00140677	merged_common_peaks	342.124	401.091
3	11454634	11462695	5066	-0.04884	8.91819	0.0112328	merged_common_peaks	475.654	492.033
3	11469694	11475373	2865	-0.08557	8.46055	0.0109901	merged_common_peaks	341.979	362.877
3	11476495	11481933	3463	-0.00266	9.52734	0.0103682	merged_common_peaks	737.25	738.611
3	11483042	11498843	8792	0.01034	10.1184	0.00833773	merged_common_peaks	1115.6	1107.63
3	11501677	11509366	3832	-0.00392	9.39587	0.0108478	merged_common_peaks	672.742	674.573
3	11511889	11523930	6025	-0.05319	9.921	0.00660605	merged_common_peaks	951.728	987.471
3	11536397	11537638	537	-0.02374	8.16252	0.0162999	merged_common_peaks	284.178	288.893
3	11541424	11550543	4558	0.07335	9.65105	0.00589952	merged_common_peaks	824.7	783.818
3	11551383	11554341	1484	-0.01922	9.72419	0.00935934	merged_common_peaks	840.195	851.463
3	11556036	11586330	15157	-0.0474	9.744	0.00766359	merged_common_peaks	843.533	871.707
3	11587431	11588860	846	0.0248	7.85026	0.0182327	merged_common_peaks	232.754	228.787
3	11593275	11601452	4091	0.03885	9.71971	0.00830299	merged_common_peaks	854.617	831.911
3	11602831	11603720	430	0.05591	7.9722	0.0161127	merged_common_peaks	256.028	246.295
3	11606972	11614631	3445	0.00696	8.83429	0.0131346	merged_common_peaks	457.545	455.343
3	11617525	11623556	2339	0.03654	9.00872	0.011445	merged_common_peaks	521.669	508.622
3	11627380	11641365	6998	-0.02092	9.99057	0.00836714	merged_common_peaks	1009.98	1024.73
3	11643633	11645305	845	-0.13926	8.72646	0.00509004	merged_common_peaks	403.613	444.516
3	11657796	11660609	1423	-0.05209	9.35526	0.00884669	merged_common_peaks	643.241	666.89
3	11663845	11670326	3230	0.0187	8.94549	0.0124721	merged_common_peaks	496.221	489.831
3	11674596	11694103	9924	0.00146	9.54489	0.0103196	merged_common_peaks	747.34	746.584
3	11694975	11695392	216	0.09676	7.71559	0.0154139	merged_common_peaks	217.364	203.264
3	11697398	11715291	10422	0.1414	9.38616	0.00214599	merged_common_peaks	702.746	637.137
3	11723260	11723907	286	-0.01911	7.88766	0.0181605	merged_common_peaks	235.259	238.396
3	11726335	11727258	458	-0.05951	8.15634	0.0147237	merged_common_peaks	279.477	291.246
3	11733161	11735417	1002	-0.11623	8.90096	0.00582753	merged_common_peaks	459.157	497.68
3	11741253	11741656	214	-0.04931	7.69481	0.0184521	merged_common_peaks	203.679	210.761
3	11763742	11765051	656	-0.06792	8.66582	0.0112052	merged_common_peaks	396.688	415.81
3	11766537	11784380	15810	0.1313	8.0389	0.0100645	merged_common_peaks	275.241	251.297
3	11793579	11798474	2441	-0.01606	9.91717	0.00879331	merged_common_peaks	961.498	972.261
3	11800424	11801266	420	-0.14983	8.53452	0.00526187	merged_common_peaks	352.042	390.569
3	11815011	11819076	2664	-0.12354	8.13081	0.0100837	merged_common_peaks	268.549	292.558
3	11819950	11823196	1623	-0.03585	8.75037	0.0126707	merged_common_peaks	425.332	436.033
3	11827733	11831445	1549	0.06126	8.36915	0.0133696	merged_common_peaks	337.743	323.701
3	11839450	11845909	3322	-0.02518	9.21669	0.011087	merged_common_peaks	589.807	600.192
3	11852021	11860580	4281	0.00334	9.9009	0.00911287	merged_common_peaks	957.129	954.916
3	11862298	11885786	11743	-0.00837	9.53505	0.0102987	merged_common_peaks	739.735	744.039
3	11890699	11892015	584	-0.05018	8.36559	0.0139208	merged_common_peaks	324.146	335.619
3	11893064	11894099	591	-0.12238	8.21078	0.00967503	merged_common_peaks	283.969	309.109
3	11895302	11897093	893	-0.11231	8.76864	0.0069649	merged_common_peaks	419.488	453.449
3	11899180	11901938	1399	0.04146	9.44743	0.0092515	merged_common_peaks	708.272	688.208
3	11926981	11948935	11250	0.04142	9.75772	0.00800456	merged_common_peaks	878.215	853.36
3	11962797	11963102	159	-0.25184	7.4084	0.0063037	merged_common_peaks	155.684	185.377
3	11964016	11966360	1159	0.07226	9.28305	0.00768533	merged_common_peaks	638.782	607.576
3	11968037	11968485	187	0.06025	7.27485	0.0213669	merged_common_peaks	158.131	151.663
3	11969604	11970566	484	0.08669	7.74436	0.0158151	merged_common_peaks	220.97	208.083
3	11972063	11973088	510	0.1042	8.54782	0.00896214	merged_common_peaks	388.002	360.966
3	11980546	11984991	2229	-0.51588	8.62054	4.50682e-08	merged_common_peaks	329.15	470.64
3	11986529	11986877	180	0.03157	7.41607	0.0210596	merged_common_peaks	172.668	168.93
3	11988342	11988731	195	-0.07451	7.41034	0.0191769	merged_common_peaks	165.775	174.562
3	11990234	11990644	182	0.06206	7.44393	0.0194977	merged_common_peaks	177.905	170.414
3	11992077	11992439	183	0.03783	7.45579	0.0205364	merged_common_peaks	177.873	173.27
3	11993940	11994316	176	0.20332	7.49976	0.00886168	merged_common_peaks	194.203	168.675
3	11997697	12054669	33261	-0.01219	9.9317	0.00887735	merged_common_peaks	972.534	980.786
3	12055842	12062632	3419	-0.00587	9.69857	0.00973733	merged_common_peaks	829.234	832.615
3	12064688	12092385	13907	-0.02617	9.78749	0.00882435	merged_common_peaks	875.768	891.799
3	12093634	12103889	5767	-0.07261	9.3286	0.00747161	merged_common_peaks	626.988	659.352
3	12105658	12121789	8013	-0.02836	9.79763	0.00863247	merged_common_peaks	881.276	898.771
3	12128465	12136958	4232	-0.06964	9.25565	0.00808899	merged_common_peaks	596.687	626.196
3	12144759	12150278	3383	-0.06076	8.57824	0.0122053	merged_common_peaks	374.25	390.349
3	12151445	12157551	3053	-0.10916	9.03292	0.00574565	merged_common_peaks	504.37	544.014
3	12160290	12164785	2292	0.03343	9.61683	0.00908042	merged_common_peaks	794.303	776.109
3	12170860	12233775	31509	-0.00229	9.82213	0.00937068	merged_common_peaks	904.505	905.942
3	12234937	12237899	1501	0.06665	8.70367	0.0108684	merged_common_peaks	426.675	407.412
3	12239302	12240825	570	0.00978	7.96838	0.0177968	merged_common_peaks	251.301	249.603
3	12242111	12265684	11747	0.01151	10.285	0.00782615	merged_common_peaks	1252.63	1242.68
3	12267005	12268702	842	-0.02545	8.03219	0.0170252	merged_common_peaks	259.477	264.095
3	12270349	12299578	14470	0.02878	9.62276	0.00935326	merged_common_peaks	796.29	780.562
3	12302020	12349318	27949	-0.00608	9.9783	0.00884453	merged_common_peaks	1006.59	1010.84
3	12353169	12354328	579	0.03994	7.58355	0.0197192	merged_common_peaks	194.486	189.175
3	12358785	12359519	368	-0.02687	7.94121	0.0175434	merged_common_peaks	243.5	248.077
3	12369965	12447589	38916	0.00842	9.94298	0.00890989	merged_common_peaks	987.194	981.449
3	12452654	12453099	213	0.0712	7.04314	0.022919	merged_common_peaks	135.18	128.671
3	12455002	12455944	471	-0.03251	8.11363	0.0164011	merged_common_peaks	273.875	280.117
3	12457512	12472124	8018	0.03123	9.90227	0.00821343	merged_common_peaks	967.344	946.629
3	12473516	12487350	6919	0.04166	10.312	0.00604417	merged_common_peaks	1289.74	1253.03
3	12488687	12558986	35161	0.08875	9.83246	0.00395497	merged_common_peaks	940.207	884.112
3	12560563	12570894	5143	-0.04181	9.97848	0.00710551	merged_common_peaks	994.326	1023.56
3	12572265	12572901	285	-0.12209	7.80539	0.0126033	merged_common_peaks	214.427	233.363
3	12575325	12589421	7054	0.04349	10.1529	0.00638859	merged_common_peaks	1155.78	1121.46
3	12602744	12623170	10217	0.12131	8.96865	0.0050133	merged_common_peaks	522.506	480.368
3	12624295	12630823	3222	-0.08996	8.81099	0.008605	merged_common_peaks	435.343	463.354
3	12631913	12632590	305	-0.01026	7.92696	0.018013	merged_common_peaks	242.498	244.229
3	12633522	12638441	2457	-0.15302	9.27551	0.00206497	merged_common_peaks	587.726	653.489
3	12639332	12653524	7095	-0.05854	8.67232	0.0119368	merged_common_peaks	399.777	416.332
3	12659630	12662032	1240	-0.00046	8.44458	0.0151164	merged_common_peaks	348.339	348.451
3	12668896	12670923	948	0.02379	9.32716	0.0106155	merged_common_peaks	647.643	637.051
3	12671760	12730330	29257	-0.05478	9.65358	0.00737622	merged_common_peaks	790.264	820.847
3	12731282	12784846	26775	0.10894	8.88798	0.00654295	merged_common_peaks	491.978	456.196
3	12793028	12794846	689	-0.02918	8.01963	0.0170875	merged_common_peaks	256.896	262.145
3	12795871	12797343	633	-0.05417	8.31881	0.0141056	merged_common_peaks	313.37	325.36
3	12799750	12807918	3992	-0.08983	9.40507	0.00565431	merged_common_peaks	657.185	699.405
3	12810082	12816473	3190	-0.08948	8.8325	0.00859604	merged_common_peaks	441.956	470.236
3	12817980	12822760	2395	-0.11576	9.0606	0.0051402	merged_common_peaks	512.966	555.822
3	12823949	12848520	11729	0.09942	8.50773	0.00962603	merged_common_peaks	376.744	351.656
3	12849649	12864903	7612	-0.03569	10.1532	0.00703692	merged_common_peaks	1124.69	1152.86
3	12866134	12866884	371	-0.06506	7.7982	0.0168817	merged_common_peaks	217.62	227.659
3	12868193	12872146	1955	-0.03768	9.43173	0.00954342	merged_common_peaks	681.651	699.689
3	12875424	12877710	1114	-0.07138	8.39409	0.0124057	merged_common_peaks	328.193	344.839
3	12884854	12891637	3283	-0.06555	8.95233	0.00970412	merged_common_peaks	484.232	506.741
3	12892684	12895132	1228	-0.07186	8.74006	0.0105419	merged_common_peaks	417.065	438.365
3	12896848	12899136	996	-0.1102	8.40857	0.00930874	merged_common_peaks	327.073	353.036
3	12901540	12905186	1756	-0.01422	8.71187	0.0136464	merged_common_peaks	417.248	421.381
3	12906518	12916708	5081	-0.10018	8.85097	0.0075426	merged_common_peaks	445.994	478.064
3	12917551	12956201	19320	-0.05817	9.72939	0.00688843	merged_common_peaks	831.922	866.151
3	12957824	12968630	5373	0.02768	10.0983	0.00770359	merged_common_peaks	1106.76	1085.73
3	12970923	12998894	14133	-0.02563	10.2672	0.00728465	merged_common_peaks	1221.43	1243.32
3	13002295	13032785	15227	-0.04407	9.7888	0.00771873	merged_common_peaks	871.143	898.164
3	13042213	13044621	1180	0.05951	8.43628	0.0128819	merged_common_peaks	353.615	339.325
3	13053480	13058512	2522	-0.08841	9.18436	0.00670251	merged_common_peaks	564.236	599.894
3	13067523	13068971	585	-0.07915	7.96984	0.0146459	merged_common_peaks	243.92	257.676
3	13071921	13152842	40458	0.01297	9.52559	0.0102633	merged_common_peaks	740.356	733.73
3	13154529	13178075	12256	0.01233	9.05796	0.0121248	merged_common_peaks	535.271	530.716
3	13179333	13180130	399	-0.14796	7.70592	0.0109424	merged_common_peaks	198.355	219.778
3	13181379	13182160	388	-0.07689	7.80741	0.0160464	merged_common_peaks	218.118	230.058
3	13183442	13218377	17548	-0.07294	9.51261	0.00653363	merged_common_peaks	712.201	749.134
3	13219217	13222234	1645	-0.13144	8.36134	0.00785183	merged_common_peaks	314.218	344.19
3	13223618	13224365	369	0.05007	7.75551	0.0178164	merged_common_peaks	219.876	212.376
3	13231478	13235133	1795	-0.0473	9.3197	0.00938799	merged_common_peaks	628.622	649.574
3	13238197	13257167	9517	0.08825	9.76981	0.00427265	merged_common_peaks	900.096	846.687
3	13260304	13261430	593	-0.01116	8.08134	0.0170652	merged_common_peaks	269.803	271.898
3	13262829	13264022	605	-0.08762	8.26003	0.0120036	merged_common_peaks	297.392	316.013
3	13271365	13289816	9220	-0.04316	9.33495	0.00950639	merged_common_peaks	636.215	655.535
3	13297124	13303495	3176	-0.06058	8.85929	0.0107768	merged_common_peaks	454.772	474.275
3	13304445	13307066	1304	0.0113	8.37376	0.0153832	merged_common_peaks	333.007	330.409
3	13311476	13313162	881	-0.06442	8.05412	0.0151035	merged_common_peaks	259.918	271.786
3	13315255	13324637	4711	0.01566	9.74287	0.00941252	merged_common_peaks	861.496	852.195
3	13333292	13377132	21748	0.03037	10.0112	0.00780919	merged_common_peaks	1042.86	1021.14
3	13378512	13452959	37200	0.05882	9.68429	0.0069216	merged_common_peaks	839.682	806.136
3	13453761	13480953	13598	0.02671	9.64994	0.0092779	merged_common_peaks	810.852	795.978
3	13494253	13524487	15102	0.07319	8.84143	0.0098733	merged_common_peaks	470.492	447.218
3	13532313	13541262	4476	-0.13806	8.34563	0.00747779	merged_common_peaks	310.102	341.244
3	13542089	13542998	496	-0.03012	8.14461	0.0162376	merged_common_peaks	280.052	285.96
3	13544124	13566828	11377	-0.00548	9.82129	0.00935516	merged_common_peaks	902.98	906.416
3	13567732	13587524	9478	-0.05836	9.83267	0.00654823	merged_common_peaks	893.603	930.492
3	13594570	13799361	102432	0.0103	9.98668	0.00874931	merged_common_peaks	1018.22	1010.97
3	13800372	13841057	20335	-0.08842	9.96379	0.00341134	merged_common_peaks	968.481	1029.69
3	13843317	14065027	106325	0.03342	9.53507	0.00928413	merged_common_peaks	750.537	733.351
3	14066020	14084497	9229	0.02108	9.79623	0.0090187	merged_common_peaks	895.637	882.645
3	14095988	14132049	18031	0.06513	9.48429	0.00720762	merged_common_peaks	732.586	700.249
3	14133280	14189373	28042	-0.01709	9.57614	0.0099405	merged_common_peaks	758.81	767.852
3	14190179	14191362	524	0.05528	10.4592	0.00447984	merged_common_peaks	1434.97	1381.02
3	14205808	14208900	1999	0.03083	10.9427	0.00508228	merged_common_peaks	1989.38	1947.32
3	14209982	14226615	8312	0.06675	10.439	0.00353833	merged_common_peaks	1420.69	1356.45
3	14227665	14228096	206	-0.01863	8.52174	0.0144625	merged_common_peaks	365.17	369.916
3	14233592	14238695	2560	-0.03954	9.85309	0.00772608	merged_common_peaks	912.272	937.62
3	14241101	14272698	15749	0.04096	9.77841	0.00796636	merged_common_peaks	890.758	865.824
3	14273451	14286550	6589	0.00905	9.52456	0.0103051	merged_common_peaks	738.823	734.203
3	14287830	14308191	10787	-0.00229	9.48719	0.0105259	merged_common_peaks	717.107	718.246
3	14311879	14315150	1699	-0.05787	8.59054	0.0124151	merged_common_peaks	377.833	393.297
3	14318583	14319089	255	-0.00788	7.78386	0.018965	merged_common_peaks	219.781	220.984
3	14329492	14333876	2219	0.01856	9.39779	0.0105389	merged_common_peaks	678.907	670.229
3	14335906	14362803	13445	-0.07689	9.26894	0.00730541	merged_common_peaks	600.698	633.581
3	14365841	14398666	19668	-0.00291	9.51062	0.010439	merged_common_peaks	728.692	730.163
3	14401210	14418133	8436	-0.04832	9.95456	0.00680612	merged_common_peaks	975.772	1009.01
3	14419134	14446568	13796	0.03114	9.97648	0.00796557	merged_common_peaks	1018.37	996.627
3	14448017	14459179	5695	-0.10078	9.24995	0.00554248	merged_common_peaks	587.954	630.495
3	14459999	14469840	4864	-0.02499	9.95933	0.00831411	merged_common_peaks	986.951	1004.2
3	14471952	14472477	310	-0.02427	7.74355	0.0190495	merged_common_peaks	212.514	216.119
3	14473847	14561772	43684	-0.10506	8.97769	0.0063747	merged_common_peaks	486.117	522.838
3	14563418	14604148	34054	-0.08044	9.50398	0.00586977	merged_common_peaks	706.115	746.604
3	14609024	14613945	2459	-0.07663	9.56057	0.00604485	merged_common_peaks	735.334	775.447
3	14615863	14648922	16536	0.04496	8.86767	0.0117517	merged_common_peaks	474.462	459.904
3	14650159	14662733	6294	-0.04257	8.87447	0.0117318	merged_common_peaks	462.46	476.309
3	14664930	14669223	2143	-0.21327	9.0722	0.000627067	merged_common_peaks	499.924	579.568
3	14671286	14675686	2203	0.02114	9.25456	0.0110426	merged_common_peaks	615.293	606.343
3	14677225	14681739	2351	-0.12177	8.33527	0.00893159	merged_common_peaks	309.626	336.895
3	14683032	14685430	1683	-0.08294	7.91254	0.0148263	merged_common_peaks	234.114	247.968
3	14690553	14721910	15678	-0.01242	9.83982	0.00915812	merged_common_peaks	912.455	920.344
3	14729354	14735235	2937	0.0612	8.93792	0.0101728	merged_common_peaks	500.949	480.143
3	14737994	14748343	5183	0.07728	9.15288	0.00775317	merged_common_peaks	584.687	554.191
3	14749581	14750246	337	0.09352	7.86385	0.0145079	merged_common_peaks	240.62	225.517
3	14761888	14783058	10747	0.0138	9.91378	0.00889353	merged_common_peaks	969.22	959.993
3	14784804	14810727	12965	0.00877	10.0819	0.00849623	merged_common_peaks	1087.14	1080.55
3	14812737	14836225	11751	0.03949	9.8411	0.00785436	merged_common_peaks	929.844	904.737
3	14837355	14842791	2685	0.03502	9.56397	0.0092116	merged_common_peaks	766.148	747.775
3	14844682	14877283	16278	0.05188	9.82254	0.00694032	merged_common_peaks	921.909	889.345
3	14880695	14902666	11053	-0.00643	8.81493	0.0132649	merged_common_peaks	449.356	451.363
3	14908628	14916876	4115	0.10116	8.93147	0.00682032	merged_common_peaks	505.669	471.427
3	14919273	14928571	4672	0.15689	8.17241	0.00684737	merged_common_peaks	304.618	273.229
3	14932010	14939698	3768	-0.03768	9.28334	0.0101973	merged_common_peaks	615.024	631.299
3	14949085	14952686	1820	0.02969	8.88131	0.0124425	merged_common_peaks	476.441	466.737
3	14956910	14987868	11791	-0.07703	9.43596	0.0065403	merged_common_peaks	674.393	711.379
3	14989272	15007289	9819	-0.01546	9.44309	0.0104481	merged_common_peaks	692.351	699.81
3	15009502	15014940	2723	-0.00252	9.78498	0.00948652	merged_common_peaks	881.441	882.982
3	15020788	15022714	1103	-0.02263	7.68175	0.0194528	merged_common_peaks	203.719	206.939
3	15024564	15026005	723	-0.13617	8.46355	0.00694903	merged_common_peaks	336.734	370.065
3	15026917	15048565	10835	0.04474	9.68686	0.00812789	merged_common_peaks	837.085	811.524
3	15050895	15075549	12344	-0.03598	9.0651	0.0112637	merged_common_peaks	528.995	542.354
3	15077721	15079533	919	-0.01056	9.06093	0.0121136	merged_common_peaks	532.136	536.045
3	15081010	15081696	361	-0.01109	7.91503	0.0180869	merged_common_peaks	240.432	242.287
3	15082872	15091382	4259	0.07664	8.72948	0.010027	merged_common_peaks	435.884	413.333
3	15097041	15170298	45670	0.0057	10.0445	0.00864704	merged_common_peaks	1058.15	1053.98
3	15173362	15177523	2162	-0.00519	9.49367	0.0104894	merged_common_peaks	719.612	722.205
3	15186838	15189847	1498	-0.09467	9.07011	0.00688406	merged_common_peaks	520.147	555.424
3	15219266	15221849	1306	-0.06655	8.68175	0.0111746	merged_common_peaks	401.283	420.227
3	15229504	15233506	2023	0.07343	9.35478	0.00709082	merged_common_peaks	671.617	638.289
3	15245607	15269964	12161	0.04542	10.4049	0.00553388	merged_common_peaks	1377.26	1334.58
3	15270853	15271623	388	-0.19088	7.9843	0.00567846	merged_common_peaks	237.019	270.548
3	15279113	15293669	7150	0.0029	9.22747	0.0115141	merged_common_peaks	600.042	598.837
3	15294130	15295010	573	0.02353	7.75827	0.0189632	merged_common_peaks	218.28	214.749
3	15298107	15331486	16685	-0.07479	9.37651	0.00708411	merged_common_peaks	647.67	682.131
3	15335798	15338944	1571	-0.01141	8.84808	0.0130215	merged_common_peaks	459.008	462.652
3	15349797	15352968	1674	-0.03023	8.81839	0.0126908	merged_common_peaks	446.735	456.194
3	15359211	15366854	3823	0.08857	9.87571	0.00376152	merged_common_peaks	968.76	911.074
3	15370792	15401563	14431	0.07089	9.54737	0.00652768	merged_common_peaks	766.858	730.087
3	15408078	15430487	11208	-0.11557	9.4994	0.00328237	merged_common_peaks	695.359	753.354
3	15433650	15436099	1240	-0.08459	8.90136	0.00856346	merged_common_peaks	464.349	492.389
3	15440151	15450010	4849	-0.10273	9.20296	0.00550132	merged_common_peaks	568.728	610.702
3	15451967	15452779	375	-0.14288	7.81556	0.0104552	merged_common_peaks	214.394	236.714
3	15454490	15468105	6875	0.10706	9.77262	0.00285383	merged_common_peaks	907.749	842.825
3	15469723	15474542	2395	0.00527	9.44445	0.0106526	merged_common_peaks	698.001	695.456
3	15476784	15482880	3063	-0.0693	9.12228	0.00861619	merged_common_peaks	544.063	570.835
3	15486555	15492046	2715	-0.0708	9.65499	0.0061997	merged_common_peaks	786.657	826.224
3	15493566	15501387	3909	-0.03568	10.0261	0.00742785	merged_common_peaks	1029.86	1055.65
3	15507036	15509241	1096	0.04951	8.91258	0.0112499	merged_common_peaks	490.237	473.698
3	15524510	15530936	3221	0.00506	9.63345	0.00997816	merged_common_peaks	795.644	792.859
3	15531777	15538616	3412	0.02614	9.8905	0.00848322	merged_common_peaks	957.793	940.595
3	15540222	15555080	7428	0.00975	10.1657	0.00820621	merged_common_peaks	1152.5	1144.74
3	15561471	15562579	447	-0.06934	8.00709	0.0149165	merged_common_peaks	251.153	263.518
3	15571018	15597910	13432	0.03002	9.8434	0.00843618	merged_common_peaks	928.276	909.16
3	15608657	15614127	2833	-0.0521	8.49505	0.0132118	merged_common_peaks	354.342	367.373
3	15618612	15642856	12047	-0.01478	9.51043	0.0102688	merged_common_peaks	725.605	733.077
3	15649184	15653277	2074	0.04881	9.20987	0.0097913	merged_common_peaks	602.274	582.238
3	15666827	15667452	306	0.16889	7.35755	0.0127147	merged_common_peaks	173.886	154.676
3	15681539	15682647	379	-0.31239	7.63134	0.00196992	merged_common_peaks	177.927	220.944
3	15687242	15698910	5561	0.03431	9.82485	0.00819642	merged_common_peaks	917.78	896.211
3	15710060	15737288	13458	-0.04448	9.98485	0.0069908	merged_common_peaks	997.802	1029.04
3	15737483	15739889	1958	-0.06671	8.2094	0.0138927	merged_common_peaks	289.224	302.912
3	15764298	15767007	1337	0.02375	8.28776	0.0156359	merged_common_peaks	315.093	309.949
3	15779647	15780761	489	0.13161	8.1799	0.00884187	merged_common_peaks	303.532	277.068
3	15786230	15794795	4285	-0.09826	9.40587	0.00496834	merged_common_peaks	655.631	701.841
3	15796197	15796886	339	-0.03814	7.91271	0.0174975	merged_common_peaks	237.806	244.176
3	15797695	15799230	765	-0.04296	8.96528	0.0112761	merged_common_peaks	492.439	507.323
3	15803296	15810611	3871	0.11947	9.32355	0.00372842	merged_common_peaks	667.806	614.733
3	15812176	15818324	3099	0.08113	9.4625	0.00602557	merged_common_peaks	725.617	685.938
3	15828512	15832886	2186	0.00481	8.86707	0.0130224	merged_common_peaks	467.711	466.155
3	15837753	15838457	346	0.01945	7.48984	0.0208954	merged_common_peaks	180.965	178.541
3	15847140	15854324	3578	-0.02743	9.76899	0.00879037	merged_common_peaks	864.232	880.821
3	15859522	15864928	2654	-0.06872	9.0044	0.00918302	merged_common_peaks	501.477	525.942
3	15873347	15875466	1065	-0.12909	8.81827	0.00547866	merged_common_peaks	431.652	472.056
3	15876651	15877049	212	-0.23848	7.51301	0.00610613	merged_common_peaks	168.169	198.398
3	15880501	15883942	1699	0.0392	8.95306	0.0116351	merged_common_peaks	502.389	488.922
3	15898757	15900171	750	-0.16844	8.1963	0.00616051	merged_common_peaks	276.681	310.946
3	15915723	15924034	4150	-0.02181	9.93046	0.00852503	merged_common_peaks	968.464	983.216
3	15926838	15927261	224	0.24923	7.5191	0.00518008	merged_common_peaks	199.98	168.253
3	15931127	15934588	1714	-0.07435	8.98657	0.00897731	merged_common_peaks	494.352	520.497
3	15937898	15938825	464	-0.0365	8.22252	0.0156656	merged_common_peaks	294.938	302.496
3	15943706	15946082	1198	-0.00558	8.34149	0.0156418	merged_common_peaks	323.742	324.996
3	15954415	15957020	1297	-0.18146	8.73797	0.00248427	merged_common_peaks	400.939	454.678
3	15960038	15968019	3988	0.01516	9.83422	0.00908269	merged_common_peaks	917.65	908.058
3	15976625	15977664	654	-0.24022	7.67766	0.00443919	merged_common_peaks	188.386	222.517
3	15996455	16000050	1800	-0.11707	9.56647	0.00288758	merged_common_peaks	728.071	789.615
3	16038853	16041240	1197	-0.01272	9.88057	0.0089923	merged_common_peaks	938.498	946.809
3	16043621	16044333	364	0.00641	7.85605	0.0185105	merged_common_peaks	232.205	231.176
3	16051883	16052561	332	-0.11447	7.92159	0.0124876	merged_common_peaks	233.027	252.27
3	16064060	16067139	1522	-0.09491	9.13884	0.00626432	merged_common_peaks	545.481	582.573
3	16071606	16072026	204	0.00506	7.7292	0.0193175	merged_common_peaks	212.561	211.816
3	16083805	16088323	2736	-0.03145	9.32118	0.0103275	merged_common_peaks	632.734	646.679
3	16089427	16090247	402	-0.08532	7.94203	0.0147355	merged_common_peaks	238.752	253.298
3	16100086	16106558	3296	-0.02378	9.74781	0.00908557	merged_common_peaks	852.715	866.887
3	16142005	16144292	1130	-0.02208	8.91737	0.0125053	merged_common_peaks	479.814	487.213
3	16154991	16156276	394	-0.03573	7.80087	0.0181347	merged_common_peaks	220.251	225.774
3	16158611	16163058	2279	0.04874	10.0808	0.00635561	merged_common_peaks	1101.44	1064.85
3	16172473	16183737	5649	-0.03155	10.0607	0.00754272	merged_common_peaks	1056.36	1079.72
3	16185415	16186133	355	0.03808	7.95454	0.0172672	merged_common_peaks	251.355	244.807
3	16201781	16202287	250	-0.2083	7.27691	0.00967547	merged_common_peaks	144.283	166.694
3	16212857	16213918	526	-0.26463	7.54789	0.00442876	merged_common_peaks	170.73	205.103
3	16222018	16222534	271	-0.04479	7.67042	0.0188886	merged_common_peaks	200.579	206.904
3	16234776	16235641	310	0.16055	7.46963	0.0127406	merged_common_peaks	187.391	167.655
3	16240558	16241823	643	-0.04229	9.16696	0.0103773	merged_common_peaks	566.454	583.304
3	16245125	16249168	2038	-0.00635	9.19629	0.0116012	merged_common_peaks	585.333	587.915
3	16268880	16269732	438	-0.01249	7.67679	0.0195948	merged_common_peaks	203.734	205.506
3	16293650	16294038	214	0.31218	7.12279	0.00478773	merged_common_peaks	155.296	125.079
3	16331095	16341915	5455	0.01248	10.3782	0.00752529	merged_common_peaks	1336.68	1325.17
3	16353449	16357492	2015	0.0308	8.99032	0.0117851	merged_common_peaks	514.034	503.176
3	16405268	16405644	212	-0.06015	7.56152	0.0188454	merged_common_peaks	185.008	192.885
3	16418003	16419979	974	0.0582	8.27325	0.013986	merged_common_peaks	315.687	303.205
3	16437116	16438569	728	-0.12163	9.10424	0.00460282	merged_common_peaks	527.645	574.059
3	16441308	16442026	340	-0.07242	8.05518	0.0143843	merged_common_peaks	259.388	272.741
3	16451256	16452163	452	-0.04815	7.96379	0.0167289	merged_common_peaks	245.523	253.856
3	16498001	16501910	1946	0.03611	9.33234	0.010057	merged_common_peaks	652.754	636.618
3	16510490	16512912	1198	-0.05837	9.11155	0.00963801	merged_common_peaks	542.081	564.463
3	16520716	16522095	486	-0.2328	7.72466	0.00496249	merged_common_peaks	195.126	229.295
3	16534561	16535656	697	0.0429	7.74195	0.0184804	merged_common_peaks	217.278	210.912
3	16548908	16549959	530	0.05825	8.27791	0.0139696	merged_common_peaks	316.714	304.181
3	16562060	16563759	678	0.00966	8.49164	0.0148214	merged_common_peaks	361.154	358.744
3	16588898	16596214	3662	0.02857	9.92358	0.00824694	merged_common_peaks	980.834	961.601
3	16600956	16604262	1632	-0.0937	9.73102	0.00397637	merged_common_peaks	822.67	877.874
3	16635789	16647386	5823	0.03022	9.56821	0.00941035	merged_common_peaks	767.126	751.224
3	16669833	16672615	1395	-0.03797	9.62317	0.0087345	merged_common_peaks	778.301	799.057
3	16682047	16682884	497	-0.11324	7.9926	0.0119369	merged_common_peaks	244.888	264.885
3	16691156	16700398	4605	-0.06631	9.95818	0.00525567	merged_common_peaks	972.143	1017.87
3	16709096	16712014	1465	-0.09479	8.90477	0.00780686	merged_common_peaks	463.805	495.302
3	16715464	16716057	277	0.31116	7.52576	0.00238897	merged_common_peaks	205.264	165.442
3	16719595	16719926	162	-0.0412	7.63474	0.0191031	merged_common_peaks	195.923	201.598
3	16809197	16814193	2505	0.03768	10.094	0.00713165	merged_common_peaks	1107.34	1078.79
3	16829189	16831870	1283	0.06595	9.0083	0.00939851	merged_common_peaks	526.86	503.318
3	16839836	16840519	340	0.05717	8.19168	0.0148698	merged_common_peaks	298.227	286.64
3	16853076	16853487	220	-0.24783	7.49061	0.00555508	merged_common_peaks	165.043	195.975
3	16876377	16878089	843	-0.0199	9.16244	0.0114579	merged_common_peaks	569.081	576.985
3	16880103	16882601	1190	0.05054	9.26369	0.00934303	merged_common_peaks	625.541	604.006
3	16898955	16901127	1077	0.10335	8.43143	0.00965714	merged_common_peaks	357.824	333.087
3	16957307	16962810	2760	-0.04757	10.2061	0.00594858	merged_common_peaks	1161.98	1200.93
3	16974408	16974900	244	-0.1181	7.91696	0.0119984	merged_common_peaks	231.989	251.778
3	16989256	16989937	347	-0.01073	7.87721	0.0183141	merged_common_peaks	234.24	235.989
3	16993187	16993848	313	-0.01019	7.66092	0.019787	merged_common_peaks	201.666	203.096
3	17033724	17035701	639	-0.00082	8.1223	0.016881	merged_common_peaks	278.569	278.727
3	17046189	17047232	549	0.18094	7.94829	0.00679816	merged_common_peaks	262.971	231.974
3	17056044	17058261	1098	0.0773	9.05726	0.00845976	merged_common_peaks	547.195	518.647
3	17067703	17069042	639	-0.04466	8.8897	0.0115009	merged_common_peaks	467.03	481.713
3	17070185	17072082	866	0.06178	8.58557	0.0121841	merged_common_peaks	392.476	376.024
3	17098374	17101010	1179	0.21405	8.27678	0.0029217	merged_common_peaks	334.023	287.966
3	17106380	17115073	4333	-0.00266	9.59561	0.0101381	merged_common_peaks	772.976	774.403
3	17116964	17117716	361	-0.14923	8.08125	0.00831855	merged_common_peaks	257.18	285.207
3	17142918	17143940	495	-0.08665	8.35114	0.0114901	merged_common_peaks	316.885	336.501
3	17164338	17164838	262	-0.09576	7.57894	0.0163471	merged_common_peaks	184.959	197.652
3	17202903	17203675	386	-0.01973	7.83966	0.0184297	merged_common_peaks	227.511	230.644
3	17226326	17227274	482	-0.08091	8.19049	0.0132581	merged_common_peaks	284.057	300.442
3	17275972	17277334	717	0.03238	8.6186	0.0136585	merged_common_peaks	397.494	388.672
3	17298964	17300919	983	-0.0506	9.02444	0.0105782	merged_common_peaks	511.695	529.96
3	17356653	17358092	714	0.02899	8.95075	0.0120523	merged_common_peaks	499.813	489.87
3	17362927	17368252	2655	-0.09071	9.73746	0.00411179	merged_common_peaks	827.207	880.888
3	17382296	17383582	651	-0.06715	8.59118	0.0116395	merged_common_peaks	376.787	394.739
3	17392463	17395188	1375	-0.00399	9.71243	0.00972595	merged_common_peaks	837.784	840.105
3	17396201	17397056	422	-0.21907	7.85977	0.00460541	merged_common_peaks	215.305	250.611
3	17402218	17419257	8500	0.01718	9.94599	0.00870925	merged_common_peaks	992.264	980.518
3	17429674	17437528	3903	0.01549	10.1211	0.0081823	merged_common_peaks	1119.64	1107.68
3	17469777	17471038	626	-0.03902	9.00873	0.0113007	merged_common_peaks	508.189	522.121
3	17516541	17516971	205	-0.01117	7.45853	0.0211285	merged_common_peaks	175.21	176.572
3	17640067	17641196	569	-0.06695	7.69239	0.0173707	merged_common_peaks	202.099	211.698
3	17662408	17662707	157	0.08509	7.34576	0.0189475	merged_common_peaks	167.533	157.938
3	17663589	17666285	1314	0.13814	8.95339	0.00416459	merged_common_peaks	520.033	472.549
3	17682914	17683797	443	-0.12689	8.26423	0.00889678	merged_common_peaks	294.227	321.277
3	17730311	17731018	358	0.01993	7.75318	0.0190062	merged_common_peaks	217.24	214.259
3	17741256	17741743	248	0.06139	7.95785	0.0158398	merged_common_peaks	253.975	243.395
3	17775611	17777608	1000	0.12428	8.9672	0.00479837	merged_common_peaks	522.519	479.391
3	17842432	17843174	376	0.01806	7.84069	0.0184297	merged_common_peaks	230.675	227.806
3	17928794	17929278	244	0.07514	7.47085	0.0188833	merged_common_peaks	182.079	172.838
3	17978418	17985573	3600	-0.03501	10.2659	0.00669688	merged_common_peaks	1216.37	1246.25
3	18018982	18019799	354	-0.05773	8.03937	0.0158126	merged_common_peaks	257.871	268.399
3	18047442	18047929	246	0.17057	7.51964	0.010782	merged_common_peaks	194.675	172.967
3	18062367	18062998	316	-0.02224	7.60238	0.0199823	merged_common_peaks	192.84	195.836
3	18069345	18070317	490	0.06174	8.49248	0.0127091	merged_common_peaks	367.946	352.532
3	18110467	18112529	1011	-0.12548	8.99819	0.00484601	merged_common_peaks	489.597	534.087
3	18146664	18147033	161	0.07646	7.35446	0.0194838	merged_common_peaks	168.043	159.369
3	18171108	18172672	782	-0.03935	7.96553	0.017203	merged_common_peaks	246.57	253.388
3	18180197	18180574	173	-0.10793	7.26887	0.0186554	merged_common_peaks	148.56	160.101
3	18243550	18244324	395	-0.09359	7.77747	0.0147356	merged_common_peaks	212.405	226.641
3	18308479	18310560	1041	-0.07033	8.9287	0.0097407	merged_common_peaks	475.577	499.335
3	18412136	18413085	480	-0.01345	8.00614	0.0175199	merged_common_peaks	255.896	258.293
3	18458199	18458931	358	0.0285	7.79295	0.0185852	merged_common_peaks	223.976	219.595
3	18543428	18544806	705	0.11112	8.79928	0.00698937	merged_common_peaks	462.991	428.669
3	18630031	18632169	1079	0.04042	9.18211	0.0104813	merged_common_peaks	589.08	572.805
3	18646197	18647121	444	0.05894	8.14021	0.0147819	merged_common_peaks	287.951	276.424
3	18652106	18655045	1448	0.00976	9.76329	0.00946951	merged_common_peaks	871.991	866.112
3	18734103	18740928	3191	-0.0573	9.78443	0.00671182	merged_common_peaks	864.535	899.563
3	18746789	18747377	293	-0.11932	7.47241	0.0154244	merged_common_peaks	170.396	185.088
3	18757165	18758250	587	-0.0562	8.19139	0.0148698	merged_common_peaks	286.679	298.066
3	18791097	18796365	2620	0.02935	10.2485	0.0071127	merged_common_peaks	1228.9	1204.15
3	18831073	18831732	319	-0.12233	7.92863	0.0119895	merged_common_peaks	233.53	254.196
3	18843492	18844923	691	0.00158	9.06048	0.0122046	merged_common_peaks	534.213	533.628
3	18860080	18861032	474	-0.03313	8.20318	0.0157628	merged_common_peaks	291.351	298.119
3	18864365	18865230	436	0.07169	8.13398	0.0141333	merged_common_peaks	287.98	274.02
3	18873702	18873962	123	0.06939	6.99867	0.0232245	merged_common_peaks	130.995	124.843
3	18885784	18887572	883	-0.08845	9.43615	0.00567202	merged_common_peaks	671.817	714.294
3	18927413	18928683	661	-0.10073	8.8757	0.00754892	merged_common_peaks	453.618	486.422
3	19133533	19134837	646	0.06652	9.05449	0.00933006	merged_common_peaks	544.108	519.59
3	19178604	19178901	148	-0.04248	7.35335	0.0212204	merged_common_peaks	161.133	165.948
3	19242942	19243809	434	0.05118	8.43617	0.0134124	merged_common_peaks	352.569	340.28
3	19428303	19429147	422	0.13417	7.85015	0.010997	merged_common_peaks	241.727	220.26
3	19520723	19521172	222	0.2376	7.51728	0.00613028	merged_common_peaks	198.925	168.719
3	19529055	19529698	430	0.22625	7.35515	0.00787051	merged_common_peaks	177.082	151.379
3	19622176	19623099	463	0.08741	8.70382	0.00949668	merged_common_peaks	429.801	404.533
3	19739887	19740225	172	0.24051	6.80723	0.0119418	merged_common_peaks	121.725	103.034
3	19753524	19753945	214	-0.13452	6.95927	0.0198263	merged_common_peaks	118.769	130.376
3	19765169	19765662	182	0.04102	7.78015	0.0182478	merged_common_peaks	222.963	216.713
3	19776573	19778988	1208	-0.10793	9.22463	0.00495038	merged_common_peaks	576.296	621.063
3	19959623	19960236	245	0.11344	7.75803	0.0137335	merged_common_peaks	225.151	208.126
3	20188558	20189301	346	-0.08293	8.03431	0.0140516	merged_common_peaks	254.734	269.805
3	20200998	20203432	1112	0.20139	8.65318	0.00187696	merged_common_peaks	431.697	375.452
3	20206616	20208267	893	0.25728	8.43636	0.000955619	merged_common_peaks	378.723	316.864
3	20233676	20234830	514	-0.13047	8.63384	0.0062675	merged_common_peaks	379.671	415.607
3	20259134	20260450	646	0.1734	9.43032	0.000888995	merged_common_peaks	732.67	649.696
3	20304646	20310123	2738	0.02685	10.1598	0.00750272	merged_common_peaks	1154.64	1133.35
3	20482361	20488359	1849	-0.05582	9.04969	0.0101458	merged_common_peaks	519.788	540.294
3	20539656	20540139	240	0.0662	7.58219	0.0183324	merged_common_peaks	196.079	187.285
3	20584615	20585543	443	0.16809	8.48971	0.00437038	merged_common_peaks	381.028	339.123
3	20653943	20654679	361	-0.00229	7.81797	0.0187543	merged_common_peaks	225.475	225.833
3	20656997	20658934	1094	-0.06434	8.87078	0.0102997	merged_common_peaks	457.812	478.691
3	20685765	20686633	434	0.10016	7.73777	0.0148342	merged_common_peaks	220.992	206.17
3	20726164	20728961	1397	0.00729	10.1613	0.00827052	merged_common_peaks	1147.99	1142.2
3	20769637	20769957	160	-0.02072	7.48864	0.0207793	merged_common_peaks	178.314	180.894
3	20786797	20788216	707	0.01758	8.81458	0.0131041	merged_common_peaks	453.001	447.514
3	20875549	20876247	342	0.12911	7.64013	0.0133076	merged_common_peaks	208.613	190.755
3	20989538	20991123	802	0.07007	9.31907	0.00766352	merged_common_peaks	654.434	623.409
3	21008376	21008649	124	0.17426	6.87646	0.0171518	merged_common_peaks	124.81	110.609
3	21322848	21329525	3337	0.04076	10.1398	0.00669375	merged_common_peaks	1144.28	1112.41
3	21694255	21694734	247	-0.09762	7.2123	0.0195781	merged_common_peaks	143.359	153.395
3	21882853	21883426	283	-0.01148	7.95189	0.0178321	merged_common_peaks	246.621	248.591
3	22059414	22064848	2714	0.02134	10.1817	0.00777741	merged_common_peaks	1170.05	1152.87
3	22112991	22115641	1326	-0.04111	9.68401	0.00837473	merged_common_peaks	810.942	834.382
3	22118948	22120435	744	0.02695	8.80024	0.0128838	merged_common_peaks	449.979	441.652
3	22215404	22215751	180	0.16255	7.52356	0.0114327	merged_common_peaks	194.663	173.921
3	22232187	22242448	5132	-0.09891	9.81812	0.00323942	merged_common_peaks	872.291	934.192
3	22372195	22372886	341	0.19035	7.80404	0.00690945	merged_common_peaks	238.727	209.218
3	22382882	22391522	4331	0.00293	10.2229	0.00815272	merged_common_peaks	1196.29	1193.87
3	22524398	22530222	2912	0.02957	10.1522	0.00736792	merged_common_peaks	1149.68	1126.35
3	22568886	22570586	869	-0.05771	9.20006	0.00928774	merged_common_peaks	576.511	600.04
3	22585560	22591405	2911	0.02943	10.1808	0.00731288	merged_common_peaks	1172.61	1148.93
3	22660409	22662456	1026	-0.00015	9.36672	0.0109784	merged_common_peaks	660.148	660.216
3	22695452	22700594	2566	-0.01844	10.3331	0.00747343	merged_common_peaks	1281.7	1298.18
3	22767125	22767711	318	0.11686	8.07005	0.0109717	merged_common_peaks	279.844	258.07
3	23108940	23115825	3436	0.07649	10.3522	0.00313971	merged_common_peaks	1342.29	1272.98
3	23157035	23158166	581	-0.04707	8.63507	0.0127199	merged_common_peaks	391.138	404.11
3	23203698	23207321	1801	-0.03052	10.043	0.00774337	merged_common_peaks	1043.89	1066.21
2	10421	50499	30763	0.02178	9.52324	0.00998114	merged_common_peaks	741.411	730.302
2	58250	72487	7204	-0.11176	9.76775	0.00263951	merged_common_peaks	838.618	906.165
2	184146	184433	161	-0.008	7.18412	0.0233264	merged_common_peaks	145.021	145.828
2	238184	238971	367	-0.19742	7.74882	0.00725051	merged_common_peaks	200.869	230.325
2	241396	241775	173	0.0541	7.45204	0.0202439	merged_common_peaks	178.415	171.848
2	243893	249225	2652	0.06088	9.32579	0.00838332	merged_common_peaks	655.399	628.318
2	292992	293504	269	-0.09559	7.25777	0.019362	merged_common_peaks	148.054	158.196
2	314664	315153	250	-0.03953	7.61471	0.0192353	merged_common_peaks	193.333	198.704
2	373133	378718	2798	0.02985	10.2312	0.00721755	merged_common_peaks	1214.46	1189.6
2	395112	396230	553	-0.08388	8.47689	0.0109666	merged_common_peaks	346.077	366.795
2	402817	403110	167	0.03373	7.13751	0.0234013	merged_common_peaks	142.456	139.164
2	500411	501785	690	-0.1404	8.58736	0.00563204	merged_common_peaks	366.371	403.818
2	530154	537667	3751	0.02418	10.1084	0.00788881	merged_common_peaks	1113.22	1094.72
2	542870	543881	470	0.09532	8.07793	0.0127186	merged_common_peaks	279.284	261.428
2	565807	582744	8587	-0.08455	9.4047	0.00600663	merged_common_peaks	658.22	697.948
2	612704	613366	329	0.0216	7.84862	0.0183905	merged_common_peaks	232.232	228.78
2	667124	668044	462	-0.07569	8.21635	0.0135358	merged_common_peaks	289.718	305.324
2	676772	678602	790	0.28624	8.29153	0.000751776	merged_common_peaks	346.005	283.737
2	688291	689225	433	0.03118	7.85352	0.0180379	merged_common_peaks	233.797	228.798
2	707968	709562	813	-0.09697	8.64244	0.00894516	merged_common_peaks	386.401	413.265
2	713371	713733	166	0.38297	7.34067	0.0013052	merged_common_peaks	185.099	141.945
2	752492	753666	586	0.04656	8.40451	0.0140185	merged_common_peaks	344.364	333.428
2	794736	796143	672	-0.05139	8.29844	0.0144445	merged_common_peaks	309.275	320.49
2	808279	808962	343	0.09938	7.91861	0.0139195	merged_common_peaks	250.436	233.766
2	818998	826128	3576	0.02399	9.65395	0.00943038	merged_common_peaks	812.343	798.946
2	870816	872238	673	-0.05015	8.25903	0.0145951	merged_common_peaks	301.07	311.72
2	885666	886615	458	0.04185	8.27184	0.0150148	merged_common_peaks	313.596	304.63
2	895566	896444	424	0.00484	8.27809	0.0159897	merged_common_peaks	310.944	309.902
2	904453	905114	328	-0.00966	7.93584	0.01794	merged_common_peaks	244.046	245.686
2	909714	914826	2479	-0.07337	9.77462	0.0054858	merged_common_peaks	853.907	898.457
2	925370	934373	4505	0.01234	9.71477	0.00958817	merged_common_peaks	843.907	836.719
2	980079	980404	165	0.11598	7.21392	0.0181481	merged_common_peaks	154.548	142.61
2	1010815	1012914	1045	-0.05332	9.17107	0.00970318	merged_common_peaks	565.903	587.209
2	1048564	1049323	386	-0.10764	7.94983	0.0124539	merged_common_peaks	238.197	256.649
2	1065792	1066095	162	-0.07247	7.10784	0.0224822	merged_common_peaks	134.513	141.443
2	1084828	1086991	1132	-0.03206	9.41504	0.00994251	merged_common_peaks	675.125	690.295
2	1088794	1089123	174	-0.16671	7.27725	0.013444	merged_common_peaks	146.413	164.347
2	1108231	1111062	1419	0.04772	9.49973	0.00859266	merged_common_peaks	736.014	712.067
2	1126622	1127487	424	-0.20748	7.98613	0.00494777	merged_common_peaks	235.959	272.454
2	1167548	1167907	177	0.16231	7.41995	0.0127336	merged_common_peaks	181.158	161.882
2	1199314	1204084	2718	-0.18719	8.85179	0.00187762	merged_common_peaks	432.992	492.98
2	1205351	1209560	2399	0.00706	9.12596	0.0118861	merged_common_peaks	560.08	557.346
2	1214029	1215549	1024	0.00804	7.88384	0.0183144	merged_common_peaks	236.855	235.539
2	1217839	1219858	982	-0.09848	8.64508	0.00894415	merged_common_peaks	386.906	414.239
2	1221770	1222409	343	0.05846	7.82093	0.0171347	merged_common_peaks	230.746	221.582
2	1225971	1232521	3590	0.05203	9.1451	0.00993629	merged_common_peaks	576.475	556.055
2	1251587	1252788	623	-0.11846	8.59857	0.00740598	merged_common_peaks	372.047	403.885
2	1264927	1272128	3596	-0.03479	9.50411	0.00936332	merged_common_peaks	717.44	734.951
2	1280064	1281236	609	-0.04678	7.81976	0.0174751	merged_common_peaks	222.301	229.627
2	1287583	1289098	798	0.05396	8.52605	0.012857	merged_common_peaks	375.594	361.805
2	1293175	1294659	743	-0.1365	8.69566	0.00528428	merged_common_peaks	395.466	434.71
2	1295495	1306891	5640	-0.13787	8.94313	0.00414389	merged_common_peaks	469.244	516.3
2	1307968	1314331	3198	-0.05754	8.61742	0.0120898	merged_common_peaks	384.983	400.648
2	1327028	1330209	1583	-0.17636	9.19995	0.00128785	merged_common_peaks	553.243	625.181
2	1342011	1344251	1106	-0.06824	8.68257	0.0109092	merged_common_peaks	401.276	420.712
2	1370401	1373446	1076	-0.13223	8.12397	0.0092195	merged_common_peaks	266.475	292.053
2	1387141	1392800	2841	-0.08615	9.75521	0.00452302	merged_common_peaks	838.772	890.385
2	1394343	1399438	2741	0.00143	9.21476	0.0115721	merged_common_peaks	594.476	593.887
2	1402149	1402828	343	0.03418	8.00588	0.0169839	merged_common_peaks	260.109	254.019
2	1412524	1413636	551	-0.02953	8.53512	0.0140235	merged_common_peaks	367.183	374.776
2	1420763	1426164	2700	-0.06233	8.97624	0.0098833	merged_common_peaks	492.874	514.635
2	1434605	1438514	1950	-0.0056	9.22432	0.011514	merged_common_peaks	596.972	599.294
2	1456537	1457381	466	-0.18765	7.74774	0.00773837	merged_common_peaks	201.399	229.375
2	1458457	1460411	1108	-0.06481	8.66059	0.0114756	merged_common_peaks	395.679	413.859
2	1464754	1466867	1156	0.11257	8.94031	0.00587197	merged_common_peaks	510.793	472.452
2	1485438	1490428	2498	-0.10752	9.48918	0.00381789	merged_common_peaks	692.38	745.953
2	1505445	1513343	3947	-0.07201	9.66476	0.00604954	merged_common_peaks	791.67	832.188
2	1547668	1553554	2933	-0.09162	9.26028	0.00612909	merged_common_peaks	594.062	633.012
2	1599768	1602413	1337	-0.15669	9.01645	0.00258756	merged_common_peaks	490.499	546.772
2	1605907	1609638	1843	-0.07953	9.44471	0.00636647	merged_common_peaks	677.908	716.327
2	1614255	1618041	1984	-0.23949	9.33875	0.000124394	merged_common_peaks	595.932	703.543
2	1629445	1637509	4085	-0.15633	10.299	0.000192469	merged_common_peaks	1193.39	1329.97
2	1649379	1655710	2471	-0.08255	8.94083	0.00853971	merged_common_peaks	477.566	505.688
2	1664540	1668406	1937	-0.1086	9.47705	0.00380136	merged_common_peaks	686.326	739.984
2	1670149	1672429	1138	0.04139	9.22917	0.0102056	merged_common_peaks	608.817	591.599
2	1709557	1711320	1101	-0.06742	7.71826	0.0172447	merged_common_peaks	205.722	215.564
2	1716024	1716470	211	-0.12573	7.53159	0.0146768	merged_common_peaks	177.137	193.267
2	1727996	1728737	382	-0.10567	7.98586	0.0124121	merged_common_peaks	244.387	262.959
2	1740748	1774821	31862	0.05379	8.29173	0.0144631	merged_common_peaks	319.268	307.584
2	1776340	1779962	1693	0.05537	8.93049	0.0108158	merged_common_peaks	497.37	478.643
2	1781524	1787108	2776	-0.0098	9.79182	0.00938011	merged_common_peaks	883.398	889.419
2	1793592	1797446	1930	0.04714	9.11675	0.0103472	merged_common_peaks	564.301	546.16
2	1801792	1803795	1008	0.0007	8.88312	0.012981	merged_common_peaks	472.271	472.042
2	1804829	1821730	8460	-0.04986	9.14464	0.00993629	merged_common_peaks	556.296	575.858
2	1828040	1840963	6045	0.06675	9.17047	0.00856473	merged_common_peaks	589.703	563.041
2	1847688	1851168	1739	0.04804	8.8677	0.0113806	merged_common_peaks	474.979	459.423
2	1855540	1856236	238	-0.29389	7.78482	0.00192928	merged_common_peaks	199.173	244.174
2	1865000	1865296	155	-0.03828	6.94362	0.0246	merged_common_peaks	121.472	124.738
2	1880143	1890393	5126	-0.04725	9.8773	0.00712478	merged_common_peaks	925.234	956.039
2	1897997	1898864	447	0.15545	7.78953	0.0104383	merged_common_peaks	233.496	209.645
2	1904483	1912917	4328	-0.00951	9.89735	0.00904626	merged_common_peaks	950.534	956.821
2	1926904	1927440	267	0.11935	7.53311	0.0152952	merged_common_peaks	193.044	177.717
2	1943894	1945396	753	-0.08359	8.27538	0.0123376	merged_common_peaks	300.993	318.947
2	1947909	1948460	270	-0.13894	7.61215	0.0127201	merged_common_peaks	186.455	205.304
2	1949462	1953339	1728	0.0725	9.08871	0.00865071	merged_common_peaks	558.324	530.96
2	1956530	1959075	1212	0.01455	9.10919	0.0118101	merged_common_peaks	555.047	549.477
2	1963041	1965576	1224	0.03336	8.79547	0.0126519	merged_common_peaks	449.491	439.217
2	1968374	1969058	392	-0.2597	7.62642	0.00428572	merged_common_peaks	180.589	216.207
2	1970263	1974835	2224	0.00679	9.49084	0.0104821	merged_common_peaks	721.19	717.803
2	1987940	1989640	663	-0.00784	8.00629	0.0175199	merged_common_peaks	256.421	257.818
2	1995965	2010951	7493	0.07091	9.57269	0.0065224	merged_common_peaks	780.441	743.009
2	2021112	2022274	429	0.07192	8.17949	0.0139877	merged_common_peaks	297.233	282.779
2	2035961	2054290	9160	-0.00972	10.1576	0.00823062	merged_common_peaks	1138.37	1146.07
2	2057896	2066694	4411	-0.09526	8.85349	0.00806544	merged_common_peaks	447.536	478.084
2	2074128	2080407	3141	-0.05365	9.88977	0.00663225	merged_common_peaks	931.199	966.479
2	2085747	2086538	386	-0.05418	7.90164	0.0167444	merged_common_peaks	234.68	243.661
2	2088938	2117360	17876	0.01947	9.08555	0.0118281	merged_common_peaks	546.958	539.626
2	2122094	2132150	4315	-0.00331	9.6947	0.00978428	merged_common_peaks	827.746	829.648
2	2133375	2138003	2276	-0.00247	9.54	0.0103334	merged_common_peaks	743.797	745.071
2	2138843	2140994	1120	-0.09756	8.29447	0.0112042	merged_common_peaks	303.529	324.764
2	2148655	2150870	1112	-0.02604	9.10648	0.0114824	merged_common_peaks	546.266	556.215
2	2152816	2153450	361	0.06544	7.69615	0.0177558	merged_common_peaks	212.14	202.732
2	2154710	2156947	1107	-0.02516	8.97578	0.0120736	merged_common_peaks	499.105	507.886
2	2158328	2158768	230	0.19709	7.7531	0.0067797	merged_common_peaks	230.983	201.489
2	2162488	2170676	4094	-0.05212	8.89178	0.0109131	merged_common_peaks	466.496	483.657
2	2185655	2192489	3427	0.01974	9.58465	0.0098518	merged_common_peaks	773.105	762.599
2	2193567	2197640	2038	-0.02924	9.49225	0.00971896	merged_common_peaks	712.937	727.534
2	2201948	2212641	5285	0.04075	9.78742	0.00795179	merged_common_peaks	896.273	871.312
2	2217455	2228113	4854	-0.0884	9.00378	0.00779819	merged_common_peaks	497.854	529.314
2	2232688	2233664	553	-0.02503	7.96454	0.0175498	merged_common_peaks	247.627	251.961
2	2236776	2239210	1232	-0.0409	8.69823	0.0128646	merged_common_peaks	409.517	421.293
2	2240315	2240852	289	-0.20646	7.46126	0.00877032	merged_common_peaks	164.054	189.295
2	2246334	2248043	1044	-0.22953	7.90917	0.00406721	merged_common_peaks	221.998	260.283
2	2249104	2250597	736	-0.03745	8.21037	0.0155285	merged_common_peaks	292.369	300.057
2	2251629	2256204	2264	-0.06601	8.62539	0.0115613	merged_common_peaks	385.981	404.051
2	2262558	2264503	967	-0.10084	8.73651	0.00806178	merged_common_peaks	411.883	441.702
2	2273769	2282737	4539	0.06403	9.99329	0.0053775	merged_common_peaks	1042.12	996.879
2	2284260	2284517	132	0.08365	6.74693	0.0242615	merged_common_peaks	110.565	104.337
2	2293881	2307221	6858	0.1539	9.08125	0.00271116	merged_common_peaks	571.338	513.528
2	2318923	2321777	1477	-0.00222	8.62437	0.0141892	merged_common_peaks	394.33	394.937
2	2356835	2357511	402	-0.02595	7.87828	0.0180823	merged_common_peaks	233.181	237.413
2	2362734	2363059	167	0.05445	7.24888	0.0215518	merged_common_peaks	154.998	149.257
2	2364943	2371859	3353	-0.03662	9.35672	0.00986717	merged_common_peaks	647.354	663.996
2	2373398	2411081	18843	0.06884	9.1879	0.00834781	merged_common_peaks	597.303	569.472
2	2413862	2424175	5184	0.0255	9.68497	0.00926376	merged_common_peaks	830.433	815.884
2	2437182	2454742	8783	0.02327	9.62636	0.00950995	merged_common_peaks	796.756	784.008
2	2460807	2517757	27566	0.00434	10.0431	0.0086511	merged_common_peaks	1056.64	1053.47
2	2520650	2559381	19358	0.0426	9.22737	0.010212	merged_common_peaks	608.313	590.613
2	2560318	2584092	11883	-0.1524	9.03803	0.00292478	merged_common_peaks	498.631	554.187
2	2591667	2606912	7624	0.0065	9.46248	0.0105849	merged_common_peaks	707.08	703.902
2	2607776	2610849	1512	-0.01627	8.87895	0.0128303	merged_common_peaks	468.146	473.455
2	2616450	2628497	6007	0.06072	9.98797	0.00561559	merged_common_peaks	1037.09	994.35
2	2631978	2637165	2592	-0.01384	9.42539	0.0105669	merged_common_peaks	684.293	690.889
2	2638830	2652869	7004	-0.05827	9.21043	0.00927038	merged_common_peaks	580.557	604.486
2	2660226	2695976	19508	0.02204	9.67879	0.00935788	merged_common_peaks	825.892	813.371
2	2698709	2729904	14943	-0.06536	9.42268	0.00758763	merged_common_peaks	670.921	702.016
2	2732766	2734477	879	-0.01916	8.78307	0.0132478	merged_common_peaks	437.606	443.457
2	2738795	2756004	8635	0.138	9.73984	0.00135334	merged_common_peaks	896.923	815.104
2	2766137	2822269	31127	-0.035	9.29148	0.0103011	merged_common_peaks	619.079	634.282
2	2823708	2841522	8914	0.10796	9.73503	0.00290859	merged_common_peaks	884.679	820.893
2	2844121	2849799	2838	-0.01202	9.80838	0.00929241	merged_common_peaks	892.909	900.38
2	2853250	2857501	2522	-0.08612	9.45329	0.00568064	merged_common_peaks	680.396	722.248
2	2870139	2887368	8616	0.04947	9.9207	0.00684173	merged_common_peaks	985.994	952.757
2	2893938	2894502	288	-0.07217	7.58748	0.0182948	merged_common_peaks	187.584	197.207
2	2902383	2907241	2452	-0.05499	9.36232	0.00867075	merged_common_peaks	645.747	670.835
2	2908138	2911407	1603	-0.06839	9.18745	0.00834781	merged_common_peaks	569.383	597.024
2	2913562	2917964	2194	-0.04246	8.23794	0.0151862	merged_common_peaks	297.493	306.378
2	2932511	2938759	3141	0.05191	9.38682	0.00879023	merged_common_peaks	681.597	657.508
2	2941143	2947257	3008	-0.13715	9.29234	0.00268653	merged_common_peaks	597.902	657.531
2	2952395	2954791	1235	-0.18683	8.74609	0.00219819	merged_common_peaks	402.453	458.096
2	2962892	2964207	657	-0.14485	8.88918	0.00385146	merged_common_peaks	450.929	498.554
2	2969171	2974638	2718	0.03726	9.32842	0.0100696	merged_common_peaks	651.242	634.638
2	2985028	2992119	3490	-0.04279	8.5396	0.013473	merged_common_peaks	366.636	377.673
2	2995854	2999642	1900	0.07312	8.73793	0.0102829	merged_common_peaks	437.91	416.268
2	3000726	3012260	4104	-0.09836	8.76006	0.00806468	merged_common_peaks	419.021	448.586
2	3014091	3040045	12992	0.00863	9.21001	0.0115136	merged_common_peaks	594.002	590.46
2	3040875	3045098	2107	0.00882	9.02088	0.0123202	merged_common_peaks	521.054	517.879
2	3057370	3112742	27673	-0.0275	9.94142	0.00820578	merged_common_peaks	973.927	992.67
2	3115358	3137306	10070	-0.03705	9.42178	0.00956996	merged_common_peaks	677.114	694.728
2	3138910	3166275	16492	0.03268	9.35286	0.0102331	merged_common_peaks	661.318	646.506
2	3171419	3174323	1357	-0.03987	8.89362	0.0118347	merged_common_peaks	469.078	482.222
2	3175065	3179642	2371	-0.0965	9.09332	0.00645234	merged_common_peaks	528.247	564.79
2	3181107	3192307	6042	-0.08316	8.25786	0.0123756	merged_common_peaks	297.404	315.051
2	3193926	3195446	960	-0.04194	8.35927	0.0146295	merged_common_peaks	323.652	333.199
2	3196362	3197894	871	-0.0216	7.6098	0.0199323	merged_common_peaks	193.877	196.802
2	3198754	3211586	6410	-0.02054	9.3778	0.0106056	merged_common_peaks	660.553	670.024
2	3213442	3217183	1893	-0.13863	9.27959	0.0026624	merged_common_peaks	592.337	652.08
2	3221694	3513578	145849	-0.00972	10.1689	0.00819928	merged_common_peaks	1147.34	1155.1
2	3517174	3522540	2686	-0.1258	9.1818	0.00382515	merged_common_peaks	555.984	606.641
2	3528298	3533865	2769	0.02202	8.4357	0.0148787	merged_common_peaks	348.91	343.625
2	3535938	3563230	13641	0.0305	10.3902	0.00665383	merged_common_peaks	1356.24	1327.87
2	3564234	3571949	4127	0.08446	9.66222	0.00501392	merged_common_peaks	834.316	786.875
2	3573272	3580473	3609	0.10676	9.24316	0.00497276	merged_common_peaks	628.836	583.982
2	3581498	3598703	8427	0.05257	8.89605	0.0111036	merged_common_peaks	485.166	467.805
2	3599543	3605698	3878	0.00641	9.45427	0.0106148	merged_common_peaks	703.046	699.929
2	3607507	3607910	209	0.06411	10.0516	0.00514669	merged_common_peaks	1085.09	1037.93
2	3632638	3665045	16644	0.06052	8.8523	0.010791	merged_common_peaks	471.973	452.583
2	3673360	3674451	572	-0.30592	7.58985	0.0023133	merged_common_peaks	173.271	214.199
2	3675284	3698512	11620	0.07284	9.30203	0.00748548	merged_common_peaks	647.371	615.498
2	3699296	3720370	10545	0.05324	9.24004	0.00938935	merged_common_peaks	615.946	593.63
2	3721497	3747789	13142	-0.03177	10.0143	0.00771761	merged_common_peaks	1022.89	1045.66
2	3748594	3779525	15492	0.04701	9.92775	0.0069497	merged_common_peaks	989.98	958.241
2	3784635	3797515	6492	0.01269	9.47173	0.0104517	merged_common_peaks	713.157	706.911
2	3800575	3803630	1726	0.13302	8.32305	0.00818011	merged_common_peaks	335.358	305.82
2	3804539	3935023	63965	0.02215	9.95586	0.00845629	merged_common_peaks	1000.8	985.55
2	3936102	3985450	24669	-0.00779	9.62416	0.0099905	merged_common_peaks	787.025	791.286
2	3986328	4005128	9392	0.09027	8.79193	0.00888244	merged_common_peaks	457.322	429.584
2	4007200	4018752	5776	0.03827	9.34239	0.00990255	merged_common_peaks	657.809	640.589
2	4024296	4025621	684	0.16511	7.85642	0.00894483	merged_common_peaks	245.397	218.86
2	4027886	4032502	2305	0.10079	8.45114	0.00999413	merged_common_peaks	362.424	337.969
2	4033689	4034710	471	-0.05991	7.81609	0.0171658	merged_common_peaks	220.729	230.088
2	4035852	4049178	6538	-0.05286	9.63696	0.00767644	merged_common_peaks	781.732	810.906
2	4049856	4059226	4738	-0.02446	9.68388	0.00926376	merged_common_peaks	815.562	829.507
2	4061123	4067607	3256	0.01678	9.4809	0.0102569	merged_common_peaks	718.722	710.411
2	4069911	4075458	2910	-0.04097	9.09628	0.0108774	merged_common_peaks	539.618	555.162
2	4077945	4080785	1403	-0.01824	8.93672	0.0125089	merged_common_peaks	486.94	493.135
2	4086916	4097101	5220	0.01268	9.85499	0.00911026	merged_common_peaks	930.157	922.017
2	4097919	4098162	123	-0.16595	7.48197	0.0120668	merged_common_peaks	168.779	189.354
2	4102137	4104178	1062	-0.2505	8.07785	0.00224104	merged_common_peaks	247.726	294.699
2	4106105	4107832	870	0.02938	7.81235	0.0183013	merged_common_peaks	227.077	222.5
2	4109819	4140865	15513	0.03716	9.80283	0.00813841	merged_common_peaks	904.772	881.765
2	4148680	4211249	31305	0.04147	9.91359	0.00751907	merged_common_peaks	978.43	950.706
2	4212748	4214983	1098	-0.07632	9.09859	0.00821045	merged_common_peaks	533.902	562.906
2	4216772	4220677	1957	-0.03727	9.61723	0.00874649	merged_common_peaks	775.291	795.581
2	4221486	4222286	400	-0.05965	8.02	0.0155806	merged_common_peaks	254.263	264.996
2	4226818	4261922	17561	0.13341	9.43392	0.00244255	merged_common_peaks	724.391	660.409
2	4265129	4268372	1547	-0.06055	8.39553	0.013285	merged_common_peaks	329.756	343.89
2	4270193	4271187	418	-0.00084	7.88818	0.0183144	merged_common_peaks	236.839	236.976
2	4275514	4300454	12482	-1e-05	9.79764	0.00945451	merged_common_peaks	889.984	889.99
2	4301503	4303100	803	0.05535	8.93345	0.0108084	merged_common_peaks	498.388	479.629
2	4318291	4322156	1950	0.04159	9.19511	0.010297	merged_common_peaks	594.653	577.755
2	4323373	4326574	1636	-0.09945	9.19879	0.00589345	merged_common_peaks	567.732	608.248
2	4327485	4331627	2231	-0.1525	8.43602	0.00595618	merged_common_peaks	328.505	365.131
2	4332789	4333541	371	0.014	8.10704	0.0168499	merged_common_peaks	277.057	274.382
2	4334310	4340328	2741	-0.1322	8.90558	0.00469949	merged_common_peaks	458.088	502.047
2	4353438	4354818	693	0.06711	8.63999	0.0115268	merged_common_peaks	408.317	389.758
2	4355831	4360117	2408	0.03059	9.28043	0.0105703	merged_common_peaks	628.481	615.295
2	4361571	4415805	27117	-0.01239	9.99352	0.00866016	merged_common_peaks	1015.04	1023.8
2	4424218	4428732	2827	-0.09034	8.87223	0.0080636	merged_common_peaks	454.161	483.509
2	4429902	4438056	4067	-0.07465	8.9122	0.00929358	merged_common_peaks	469.465	494.397
2	4439570	4445571	3010	-0.04868	8.89793	0.011293	merged_common_peaks	469.047	485.144
2	4450746	4456373	3018	-0.06326	9.47485	0.00754529	merged_common_peaks	696.133	727.337
2	4459232	4470674	5729	-0.00732	10.0268	0.00867954	merged_common_peaks	1040.57	1045.86
2	4473635	4476649	1508	-0.00103	7.88513	0.0183531	merged_common_peaks	236.323	236.492
2	4486063	4507450	10703	0.05469	9.92034	0.00636534	merged_common_peaks	987.533	950.798
2	4508582	4523904	7675	0.02493	9.86982	0.00861032	merged_common_peaks	943.766	927.597
2	4526025	4535987	4979	-0.03867	8.96467	0.0115963	merged_common_peaks	492.963	506.355
2	4538680	4568127	19269	0.00671	8.99067	0.0124761	merged_common_peaks	509.884	507.518
2	4569680	4590924	10623	0.01202	9.83023	0.00922265	merged_common_peaks	914.12	906.536
2	4592359	4618212	12943	0.05225	9.36839	0.00882403	merged_common_peaks	673.024	649.086
2	4622203	4652347	15080	0.01681	9.66191	0.00960925	merged_common_peaks	814.807	805.368
2	4654357	4741993	2356	-0.03595	8.29089	0.0151455	merged_common_peaks	309.311	317.116
2	4752913	4756377	1731	0.0744	8.76555	0.00997765	merged_common_peaks	446.572	424.126
2	4771955	4792924	9120	0.04426	9.52686	0.00868183	merged_common_peaks	749.087	726.455
2	4797369	4798509	559	-0.13049	8.44534	0.00725447	merged_common_peaks	333.165	364.705
2	4807941	4832371	12185	0.09746	9.48229	0.00455888	merged_common_peaks	739.815	691.488
2	4834509	4869643	17591	0.06609	9.88073	0.0054989	merged_common_peaks	964.592	921.401
2	4873136	4888081	7479	-0.03759	9.65887	0.00865567	merged_common_peaks	797.906	818.969
2	4894556	4899089	2279	0.08357	9.45327	0.00585164	merged_common_peaks	721.6	680.988
2	4900168	4920997	10472	0.00954	9.19101	0.0116209	merged_common_peaks	586.416	582.551
2	4921614	4937619	8046	0.13189	9.24127	0.00314393	merged_common_peaks	633.506	578.16
2	4946062	4946705	308	0.10243	7.91117	0.0134706	merged_common_peaks	249.412	232.318
2	4947686	5002860	30955	0.00723	9.85766	0.0091993	merged_common_peaks	930.121	925.472
2	5009243	5018092	4423	-0.09534	9.41549	0.00514581	merged_common_peaks	660.686	705.822
2	5019869	5049209	14588	0.1112	9.63517	0.003107	merged_common_peaks	826.442	765.135
2	5053936	5054587	325	-0.04602	7.7612	0.018363	merged_common_peaks	213.514	220.435
2	5056550	5056875	149	-0.05549	7.31715	0.0206738	merged_common_peaks	156.433	162.567
2	5057801	5067954	5014	-0.0052	9.49267	0.0104748	merged_common_peaks	719.111	721.707
2	5076415	5112385	19842	0.11748	9.64867	0.00267379	merged_common_peaks	836.029	770.649
2	5119639	5158909	19632	0.00794	9.67158	0.00980145	merged_common_peaks	817.769	813.281
2	5160350	5163823	1786	0.02617	8.85033	0.0125648	merged_common_peaks	465.751	457.379
2	5171720	5179695	3980	-0.00352	9.60071	0.010112	merged_common_peaks	775.482	777.377
2	5182790	5185677	1410	-0.17481	9.07083	0.00171049	merged_common_peaks	506.151	571.352
2	5187000	5188820	914	0.03987	9.27936	0.0100725	merged_common_peaks	630.038	612.865
2	5190950	5213903	11476	0.04571	10.6653	0.00461678	merged_common_peaks	1649.91	1598.46
2	5215517	5246050	15265	0.04759	10.0382	0.00650137	merged_common_peaks	1068.98	1034.29
2	5247545	5291851	22156	0.04255	10.0237	0.00704355	merged_common_peaks	1056.45	1025.74
2	5292778	5313475	10525	0.05993	9.75279	0.00659721	merged_common_peaks	880.851	845.01
2	5315024	5319711	2201	-0.04633	8.41301	0.0139846	merged_common_peaks	335.425	346.371
2	5322147	5347283	12559	-0.00654	10.0808	0.0085394	merged_common_peaks	1080.53	1085.44
2	5348046	5389160	19714	0.01953	10.0336	0.00831508	merged_common_peaks	1055.26	1041.07
2	5394591	5400069	2735	0.02329	9.8152	0.00889952	merged_common_peaks	908.187	893.643
2	5401082	5401467	209	-0.14841	7.51279	0.0127406	merged_common_peaks	173.475	192.271
2	5411758	5414832	1562	-0.35525	8.60324	3.96174e-05	merged_common_peaks	343.845	439.849
2	5423431	5425536	840	-0.0472	8.21006	0.0150642	merged_common_peaks	291.32	301.008
2	5426304	5433428	3520	0.05918	8.38324	0.0133271	merged_common_peaks	340.811	327.114
2	5434861	5439094	2018	-0.08518	8.38499	0.0117766	merged_common_peaks	324.573	344.314
2	5440524	5461363	10309	0.00744	8.90599	0.0128189	merged_common_peaks	480.939	478.465
2	5465198	5466311	540	-0.02198	8.29359	0.015612	merged_common_peaks	311.395	316.175
2	5468369	5502565	17122	-0.05135	8.55381	0.0127683	merged_common_peaks	369.168	382.545
2	5509376	5510891	738	-0.21331	8.71074	0.00139706	merged_common_peaks	389.124	451.129
2	5515832	5520418	2296	0.04996	9.09054	0.0102355	merged_common_peaks	554.683	535.803
2	5523055	5534505	5734	0.05933	9.47517	0.00770767	merged_common_peaks	726.508	697.237
2	5556831	5584267	13627	-0.01193	10.3832	0.00754569	merged_common_peaks	1329.99	1341.03
2	5585265	5586230	486	0.00346	8.58183	0.0143909	merged_common_peaks	383.627	382.708
2	5588536	5591982	1730	0.01488	8.83522	0.0130202	merged_common_peaks	459.099	454.388
2	5598496	5606423	3954	-0.01998	10.1384	0.0079384	merged_common_peaks	1119.34	1134.95
2	5607870	5608164	147	-0.48692	7.47439	0.000119983	merged_common_peaks	150.22	210.525
2	5609544	5636893	14391	0.04244	10.0272	0.00693667	merged_common_peaks	1058.94	1028.25
2	5645726	5647405	857	0.09202	8.57639	0.00990137	merged_common_peaks	394.095	369.743
2	5656926	5660036	1556	0.10551	9.1966	0.00530038	merged_common_peaks	608.602	565.681
2	5666857	5671071	1659	-0.15574	8.71803	0.00413639	merged_common_peaks	398.977	444.457
2	5709335	5716207	3438	0.03205	9.4643	0.0097996	merged_common_peaks	714.27	698.577
2	5717138	5719788	1323	0.03299	8.45965	0.0143634	merged_common_peaks	356.102	348.051
2	5721789	5738330	6745	0.01116	9.5556	0.0101968	merged_common_peaks	755.443	749.622
2	5739249	5741389	1148	0.01956	9.20711	0.0112918	merged_common_peaks	595.059	587.046
2	5751653	5752249	271	-0.33043	7.466	0.0022368	merged_common_peaks	157.672	198.255
2	5760975	5765579	2275	-0.08298	8.76476	0.00944314	merged_common_peaks	422.635	447.657
2	5774395	5775351	438	0.18522	7.53914	0.00954529	merged_common_peaks	198.329	174.433
2	5777369	5788087	5664	0.02319	10.1541	0.00771984	merged_common_peaks	1148.63	1130.31
2	5791890	5802732	5415	0.15537	9.50982	0.00130008	merged_common_peaks	769.355	690.805
2	5804848	5831308	13136	0.10517	9.25088	0.00498091	merged_common_peaks	631.862	587.439
2	5842215	5843598	696	-0.1512	8.43089	0.00563926	merged_common_peaks	327.486	363.671
2	5846134	5851576	2734	0.0118	10.049	0.00850152	merged_common_peaks	1063.7	1055.03
2	5852485	5857713	2658	0.04632	9.32175	0.009537	merged_common_peaks	650.277	629.73
2	5868581	5872386	1863	-0.12932	8.5576	0.00675287	merged_common_peaks	360.271	394.057
2	5876651	5905997	14682	0.05379	9.64471	0.0075264	merged_common_peaks	815.536	785.689
2	5939134	5940319	586	0.21371	8.32702	0.00262973	merged_common_peaks	345.819	298.206
2	5941111	5946187	2439	-0.06028	8.49279	0.0127091	merged_common_peaks	352.786	367.839
2	5947170	5948134	460	0.03544	7.96174	0.017235	merged_common_peaks	252.381	246.257
2	5949511	5950449	492	-0.0876	7.89883	0.0148629	merged_common_peaks	231.526	246.02
2	5960235	5976149	7953	-0.05513	9.7967	0.00683417	merged_common_peaks	872.575	906.564
2	5982155	6013951	15595	0.01142	9.43622	0.0105758	merged_common_peaks	695.511	690.027
2	6026950	6031224	2132	0.06679	9.86457	0.00562762	merged_common_peaks	954.079	910.917
2	6044088	6047527	1714	0.06493	9.73131	0.00632801	merged_common_peaks	869.339	831.081
2	6054999	6056919	968	-0.08178	8.39692	0.0117522	merged_common_peaks	327.654	346.764
2	6060131	6066370	3112	-0.09524	9.21842	0.00590742	merged_common_peaks	576.349	615.681
2	6067261	6085138	8948	0.0496	9.24538	0.00971	merged_common_peaks	617.451	596.583
2	6091660	6098189	3196	-0.01515	8.90479	0.0127125	merged_common_peaks	476.792	481.825
2	6100820	6102439	812	0.05	8.52011	0.0131146	merged_common_peaks	373.538	360.814
2	6105785	6128626	11449	0.03021	9.56916	0.0094052	merged_common_peaks	767.629	751.722
2	6129826	6130932	546	0.10496	8.26669	0.0108535	merged_common_peaks	319.389	296.978
2	6133764	6141496	3806	-0.01241	9.67086	0.00972964	merged_common_peaks	811.617	818.628
2	6148822	6153997	2614	-0.05591	9.46078	0.00820542	merged_common_peaks	691.136	718.446
2	6155448	6162873	3724	0.0707	9.60316	0.00635957	merged_common_peaks	797.041	758.923
2	6176167	6180634	2245	0.20747	9.22713	0.000530536	merged_common_peaks	643.977	557.719
2	6185682	6187155	698	-0.05456	8.31428	0.0141228	merged_common_peaks	312.346	324.384
2	6192854	6196667	1341	0.02867	8.61671	0.0137975	merged_common_peaks	396.464	388.663
2	6206062	6207196	555	0.04388	7.49844	0.0199397	merged_common_peaks	183.595	178.095
2	6217052	6217776	350	0.18827	8.12007	0.00529189	merged_common_peaks	296.977	260.644
2	6218694	6224553	2929	0.06008	9.19341	0.00892752	merged_common_peaks	597.771	573.389
2	6227732	6234976	3617	0.00107	9.51265	0.0104319	merged_common_peaks	730.725	730.183
2	6247043	6247787	372	0.00919	7.74116	0.0191827	merged_common_peaks	214.637	213.274
2	6248845	6253754	2449	0.09815	8.93294	0.00706596	merged_common_peaks	505.657	472.4
2	6255459	6271933	8257	0.01581	9.7036	0.00953525	merged_common_peaks	838.406	829.268
2	6294454	6296471	1011	-0.1779	8.95802	0.0019558	merged_common_peaks	467.58	528.944
2	6305056	6307622	1312	-0.01065	9.05823	0.0121248	merged_common_peaks	531.124	535.059
2	6316698	6318100	702	0.17825	8.35077	0.00459398	merged_common_peaks	347.265	306.904
2	6319515	6320446	597	0.0098	7.75125	0.019183	merged_common_peaks	216.189	214.726
2	6329639	6345040	7696	0.05665	9.84509	0.00653986	merged_common_peaks	937.981	901.863
2	6348916	6353494	2281	-0.01551	9.69365	0.00956257	merged_common_peaks	823.654	832.557
2	6371938	6373298	681	0.09281	8.05503	0.0131766	merged_common_peaks	274.647	257.535
2	6376868	6377709	494	-0.09959	8.05408	0.0127563	merged_common_peaks	256.761	275.112
2	6379103	6380634	723	-0.07456	7.93365	0.0151751	merged_common_peaks	238.256	250.893
2	6382971	6383699	311	0.03554	7.80606	0.0180975	merged_common_peaks	226.573	221.059
2	6412745	6414558	816	-0.05535	8.47988	0.0130131	merged_common_peaks	350.241	363.94
2	6415265	6416207	621	-0.0352	7.5041	0.0202182	merged_common_peaks	179.333	183.763
2	6420795	6427292	3251	-0.10373	9.80715	0.00290102	merged_common_peaks	864.238	928.665
2	6433316	6443030	4853	0.03299	9.98897	0.00776804	merged_common_peaks	1027.89	1004.65
2	6445381	6450966	2806	-0.03656	9.63731	0.00870274	merged_common_peaks	786.351	806.533
2	6457309	6466489	4603	-0.01583	10.0037	0.00854812	merged_common_peaks	1021.01	1032.28
2	6471788	6480418	4397	-0.01224	9.58235	0.0100261	merged_common_peaks	763.365	769.869
2	6486695	6490562	1977	0.07816	8.62554	0.010449	merged_common_peaks	405.799	384.399
2	6494546	6499739	2626	0.04646	8.8404	0.0116515	merged_common_peaks	465.82	451.058
2	6508082	6510863	1374	-0.0508	9.58207	0.00803283	merged_common_peaks	753.086	780.076
2	6513682	6517821	2063	-0.17913	9.05988	0.00159357	merged_common_peaks	501.573	567.881
2	6524670	6533059	4193	0.11487	9.93126	0.00190303	merged_common_peaks	1016.01	938.248
2	6548486	6558084	4798	-0.06513	9.87193	0.0057565	merged_common_peaks	916.102	958.407
2	6559607	6560981	720	0.1061	8.21179	0.0108932	merged_common_peaks	307.585	285.776
2	6566088	6583974	8939	-0.03954	9.72809	0.00828614	merged_common_peaks	836.557	859.802
2	6592439	6607872	7722	-0.0078	9.62324	0.0099905	merged_common_peaks	786.52	790.784
2	6610872	6612174	585	-0.02577	7.99168	0.0172462	merged_common_peaks	252.265	256.811
2	6619689	6626562	3428	-0.09151	9.66512	0.00444636	merged_common_peaks	786.534	838.04
2	6648191	6648833	341	0.04663	7.84915	0.0176113	merged_common_peaks	234.341	226.888
2	6658627	6663589	2531	0.01451	8.5745	0.0142967	merged_common_peaks	383.147	379.313
2	6678629	6680844	1095	-0.02112	8.37624	0.015177	merged_common_peaks	329.853	334.717
2	6691633	6692276	334	0.07677	7.75595	0.016244	merged_common_peaks	221.988	210.484
2	6700477	6706716	3118	0.03982	10.0454	0.00711246	merged_common_peaks	1071.41	1042.24
2	6714990	6732055	8560	-0.00047	9.72276	0.00970292	merged_common_peaks	844.835	845.11
2	6736440	6740277	1919	-0.12193	9.413	0.00314854	merged_common_peaks	653.496	711.128
2	6746926	6756004	4743	-0.07589	8.39178	0.0120924	merged_common_peaks	327.156	344.826
2	6766266	6772486	3120	0.0068	9.97558	0.00883566	merged_common_peaks	1009.19	1004.44
2	6778920	6786946	4010	-0.09032	9.79136	0.00403793	merged_common_peaks	858.813	914.298
2	6803519	6803907	193	0.00129	7.46097	0.0212486	merged_common_peaks	176.267	176.109
2	6813200	6813710	276	0.11176	7.39839	0.0169111	merged_common_peaks	175.371	162.299
2	6837212	6848467	5627	-0.00793	9.81526	0.00933427	merged_common_peaks	898.45	903.402
2	6852889	6855028	1031	-0.09045	8.01742	0.0136902	merged_common_peaks	251.113	267.361
2	6859888	6860822	555	-0.12858	7.78401	0.0126193	merged_common_peaks	210.798	230.448
2	6862842	6863959	578	-0.23362	8.61475	0.00114259	merged_common_peaks	361.522	425.071
2	6881329	6888320	3477	-0.02492	9.80657	0.00885191	merged_common_peaks	887.812	903.28
2	6892228	6893143	457	0.0449	8.5863	0.0131046	merged_common_peaks	390.384	378.421
2	6900559	6903755	1587	-0.02259	8.61932	0.0139036	merged_common_peaks	390.188	396.346
2	6909850	6914596	2370	-0.02817	9.77269	0.00878198	merged_common_peaks	866.229	883.309
2	6922822	6924937	1066	0.03586	8.8875	0.0120072	merged_common_peaks	479.514	467.742
2	6926142	6926456	145	0.0591	7.24661	0.0215518	merged_common_peaks	155.004	148.782
2	6935712	6946362	5310	0.00326	9.24542	0.0114287	merged_common_peaks	607.63	606.259
2	6953191	6958776	2802	-0.00075	9.81014	0.00941231	merged_common_peaks	897.498	897.965
2	6965196	6968119	1456	-0.04643	8.30318	0.014658	merged_common_peaks	310.826	320.992
2	6969090	6979069	4891	0.03456	9.60067	0.00901175	merged_common_peaks	785.763	767.163
2	6985995	6986590	298	0.04455	7.60418	0.0192799	merged_common_peaks	197.602	191.594
2	6990147	6994162	1952	-0.09467	9.67034	0.00417635	merged_common_peaks	788.521	841.999
2	7005149	7019871	7362	0.0089	9.803	0.00937024	merged_common_peaks	896.059	890.548
2	7066774	7070966	2101	0.00969	9.27901	0.0112452	merged_common_peaks	623.331	619.159
2	7073053	7073500	214	-0.03214	7.98296	0.0171081	merged_common_peaks	250.192	255.828
2	7093392	7094460	549	-0.0472	7.78259	0.0179627	merged_common_peaks	216.615	223.819
2	7112031	7120057	4032	-0.00139	9.84311	0.00930418	merged_common_peaks	918.041	918.926
2	7146164	7146755	292	0.04225	7.72499	0.0182973	merged_common_peaks	214.691	208.494
2	7147699	7148437	394	-0.11594	7.78136	0.013163	merged_common_peaks	211.335	229.02
2	7153553	7154321	345	0.08178	7.97973	0.0142062	merged_common_peaks	259.685	245.374
2	7155518	7156730	581	-0.22159	8.66674	0.00122447	merged_common_peaks	376.354	438.835
2	7168695	7169210	253	0.10708	7.71054	0.0149001	merged_common_peaks	217.381	201.83
2	7173046	7178854	2919	-0.02742	9.54731	0.00965919	merged_common_peaks	741.139	755.36
2	7193148	7194067	485	-0.11293	8.48683	0.00862698	merged_common_peaks	344.979	373.068
2	7202130	7204426	1032	-0.06132	9.40215	0.00794869	merged_common_peaks	662.368	691.128
2	7205416	7206910	718	0.17912	8.451	0.00403268	merged_common_peaks	372.361	328.885
2	7224192	7229147	2480	0.02001	10.003	0.00839532	merged_common_peaks	1033.29	1019.05
2	7230446	7238695	4133	0.063	10.1427	0.00493404	merged_common_peaks	1155.45	1106.08
2	7240721	7242602	927	-0.04583	8.41936	0.0139509	merged_common_peaks	336.963	347.839
2	7246825	7247620	390	0.01197	8.17346	0.0165294	merged_common_peaks	289.907	287.511
2	7289312	7295576	3122	0.13086	9.56916	0.00213933	merged_common_peaks	794.878	725.952
2	7327371	7328283	461	-0.11246	7.99828	0.0119318	merged_common_peaks	245.921	265.858
2	7347997	7349978	922	-0.02101	9.03688	0.0119396	merged_common_peaks	521.446	529.096
2	7351206	7353271	1049	-0.0413	8.71805	0.0126192	merged_common_peaks	415.124	427.18
2	7420902	7421774	427	-0.11872	7.93322	0.011985	merged_common_peaks	234.568	254.687
2	7440776	7442416	843	-0.25938	8.37364	0.00103613	merged_common_peaks	303.163	362.875
2	7447078	7454172	3617	-0.0366	9.84689	0.00794948	merged_common_peaks	909.286	932.649
2	7536183	7538396	1084	0.42548	9.07908	9.69166e-08	merged_common_peaks	626.782	466.696
2	7581402	7584204	1396	-0.06064	9.80022	0.00630194	merged_common_peaks	873.038	910.516
2	7657639	7660073	1230	0.16314	9.42838	0.00118506	merged_common_peaks	729.088	651.134
2	7681709	7682209	263	-0.03258	7.64947	0.0194942	merged_common_peaks	198.525	203.06
2	7720226	7720645	191	0.01829	7.53523	0.0204492	merged_common_peaks	186.674	184.322
2	7729604	7730394	401	-0.13621	8.19916	0.00845065	merged_common_peaks	280.344	308.102
2	7777046	7783894	3424	0.00733	10.0071	0.00871642	merged_common_peaks	1031.69	1026.46
2	7813621	7815271	877	-0.09775	8.63518	0.0089471	merged_common_peaks	384.358	411.302
2	7844477	7844865	190	-0.03206	7.28147	0.0222801	merged_common_peaks	153.856	157.314
2	7904309	7905019	348	-0.0354	7.4618	0.0207725	merged_common_peaks	174.14	178.465
2	7905866	7907091	579	-0.06805	8.785	0.0104585	merged_common_peaks	430.83	451.639
2	7956091	7956452	183	-0.17874	7.09683	0.0142341	merged_common_peaks	128.664	145.634
2	7959874	7961149	645	-0.00018	9.09516	0.0120587	merged_common_peaks	546.876	546.944
2	8008974	8009504	273	-0.0253	7.48245	0.0208359	merged_common_peaks	177.269	180.406
2	8016232	8018900	1324	0.04068	9.56782	0.00872992	merged_common_peaks	769.704	748.304
2	8028749	8029006	122	0.1928	6.87344	0.0161343	merged_common_peaks	125.352	109.671
2	8035477	8036947	785	-0.08604	8.85225	0.008846	merged_common_peaks	448.583	476.149
2	8038903	8040758	870	0.06282	8.26864	0.0140025	merged_common_peaks	315.184	301.754
2	8045837	8046195	177	0.00705	7.12387	0.0238201	merged_common_peaks	139.817	139.135
2	8061323	8061855	266	0.04691	7.76044	0.0181091	merged_common_peaks	220.387	213.336
2	8076078	8077998	960	0.03973	9.50068	0.00925203	merged_common_peaks	734.462	714.512
2	8099886	8100369	215	-0.00174	7.72902	0.0193629	merged_common_peaks	212.034	212.29
2	8102665	8103500	417	0.04994	8.20019	0.0151066	merged_common_peaks	299.24	289.059
2	8198426	8200214	893	0.02329	8.95939	0.0122386	merged_common_peaks	501.823	493.787
2	8236484	8237047	286	0.01248	7.50561	0.0207817	merged_common_peaks	182.512	180.94
2	8269810	8274428	2289	-0.01479	9.55187	0.0101289	merged_common_peaks	746.747	754.441
2	8300322	8302981	1155	0.00012	9.15777	0.0118027	merged_common_peaks	571.191	571.144
2	8379528	8383437	1967	0.02293	9.77417	0.0090116	merged_common_peaks	882.612	868.694
2	8420602	8422725	1142	-0.13245	8.30665	0.00779493	merged_common_peaks	302.423	331.502
2	8452350	8453649	638	0.03078	8.29135	0.0153165	merged_common_peaks	316.649	309.965
2	8554825	8555837	503	0.12768	8.0674	0.010523	merged_common_peaks	280.38	256.632
2	8560619	8566930	3157	0.03976	10.2871	0.00624565	merged_common_peaks	1266.83	1232.4
2	8568521	8569924	696	0.10279	9.29748	0.00503211	merged_common_peaks	652.066	607.224
2	8578618	8579060	206	0.27363	6.92726	0.00867459	merged_common_peaks	133.813	110.695
2	8626000	8626865	360	0.07086	8.02739	0.015208	merged_common_peaks	267.393	254.577
2	8815893	8821350	2722	0.00165	10.0307	0.00871289	merged_common_peaks	1046.63	1045.43
2	8822349	8823173	422	0.11623	8.09664	0.0109606	merged_common_peaks	284.988	262.928
2	8854528	8855150	310	0.01531	7.78938	0.0188796	merged_common_peaks	222.403	220.056
2	8883600	8885279	849	-0.00369	8.63254	0.0141535	merged_common_peaks	396.368	397.383
2	8893662	8895184	760	0.01432	8.87801	0.0128303	merged_common_peaks	472.827	468.157
2	8907506	8908154	317	0.08929	7.63431	0.0166846	merged_common_peaks	204.925	192.627
2	8911003	8911479	236	0.13591	7.48169	0.0147492	merged_common_peaks	187.357	170.513
2	8914268	8917225	1488	-0.1237	8.49637	0.00763612	merged_common_peaks	345.974	376.948
2	8993800	8998171	2185	0.00033	9.99791	0.00881869	merged_common_peaks	1022.63	1022.4
2	9047816	9048536	359	0.17449	8.48464	0.00386932	merged_common_peaks	380.535	337.185
2	9057109	9059779	1329	-0.02119	10.0239	0.0082211	merged_common_peaks	1033.47	1048.76
2	9063193	9064293	622	0.05115	8.13369	0.0153914	merged_common_peaks	285.88	275.922
2	9121960	9125925	1985	0.04565	10.3117	0.0057763	merged_common_peaks	1291.27	1251.05
2	9161393	9161879	239	-0.12193	7.86987	0.0120309	merged_common_peaks	224.241	244.017
2	9187367	9195324	3987	0.00601	9.99231	0.00878411	merged_common_peaks	1020.68	1016.44
2	9310806	9313238	1215	-0.03746	9.28797	0.0101843	merged_common_peaks	617.048	633.28
2	9314201	9314926	382	-0.00748	8.0119	0.0174862	merged_common_peaks	257.452	258.79
2	9328737	9330758	1026	-0.14948	8.7973	0.00387119	merged_common_peaks	422.428	468.544
[truncated: 1,505 more rows]

## Sheet: WT vs ddm1 R1
chr	start	end	summit	M_value	A_value	P_value	Peak_Group	normalized_read_density_in_H3K9me2_WT_R1	normalized_read_density_in_H3K9me2_ddm1_R1
1	525574	526353	390	0.21651	6.94173	0.0122384	k9me2_wt_r1_peaks_unique	132.513	114.046
1	578027	579168	571	0.61508	6.81021	0.00017294	k9me2_wt_r1_peaks_unique	138.885	90.6773
1	1265216	1268045	1415	0.56879	6.90297	0.000224617	k9me2_wt_r1_peaks_unique	145.751	98.2629
1	1619812	1620288	238	0.3376	6.89493	0.00503911	k9me2_wt_r1_peaks_unique	133.781	105.869
1	2843989	2844853	432	0.556	6.87937	0.000310487	k9me2_wt_r1_peaks_unique	142.752	97.098
1	2957886	2958782	448	0.67338	6.76305	7.63152e-05	k9me2_wt_r1_peaks_unique	137.162	86.0057
1	3737617	3738023	203	0.53802	6.82642	0.0004764	k9me2_wt_r1_peaks_unique	136.753	94.184
1	4620713	4621469	378	0.69834	6.79493	4.26777e-05	k9me2_wt_r1_peaks_unique	141.445	87.17
1	5809420	5810268	424	0.68463	6.84488	4.24649e-05	k9me2_wt_r1_peaks_unique	145.734	90.6707
1	6156621	6158899	1139	2.21732	7.14154	9.00835e-39	k9me2_wt_r1_peaks_unique	304.479	65.4754
1	6211263	6211589	163	0.39702	6.85119	0.00332932	k9me2_wt_r1_peaks_unique	132.486	100.613
1	7066162	7075893	4866	2.81412	7.02526	1.36573e-56	k9me2_wt_r1_peaks_unique	345.447	49.1187
1	7124086	7124894	404	0.61867	6.72596	0.000199347	k9me2_wt_r1_peaks_unique	131.17	85.4273
1	7204327	7205363	518	0.31573	6.99118	0.0054029	k9me2_wt_r1_peaks_unique	141.931	114.034
1	7255201	7257141	970	2.25855	6.31154	1.34529e-23	k9me2_wt_r1_peaks_unique	173.743	36.3092
1	7595473	7596595	561	0.23871	6.96747	0.010476	k9me2_wt_r1_peaks_unique	135.94	115.209
1	7861536	7863658	1061	0.53878	6.88801	0.000381773	k9me2_wt_r1_peaks_unique	142.755	98.266
1	8160255	8160650	198	0.69026	6.68059	9.04899e-05	k9me2_wt_r1_peaks_unique	130.302	80.7539
1	8475132	8476255	562	0.81677	6.92	1.37661e-06	k9me2_wt_r1_peaks_unique	160.718	91.2413
1	9077779	9078762	492	0.39626	7.03133	0.00211076	k9me2_wt_r1_peaks_unique	150.067	114.025
1	9111521	9112361	420	0.49624	6.90065	0.000802687	k9me2_wt_r1_peaks_unique	141.904	100.603
1	9194161	9195936	888	0.46144	6.82355	0.00157152	k9me2_wt_r1_peaks_unique	132.907	96.525
1	9765630	9766640	505	0.24853	6.7938	0.0119096	k9me2_wt_r1_peaks_unique	120.933	101.796
1	10152773	10156554	1891	2.76678	7.06858	1.29682e-56	k9me2_wt_r1_peaks_unique	350.184	51.4532
1	10405260	10406773	757	0.62758	6.74022	0.000170984	k9me2_wt_r1_peaks_unique	132.883	86.0099
1	11011097	11012241	572	0.65656	6.73496	0.000109736	k9me2_wt_r1_peaks_unique	133.736	84.8404
1	11047569	11051256	1844	2.5581	6.93149	2.49259e-44	k9me2_wt_r1_peaks_unique	296.223	50.2984
1	11089497	11089880	192	0.80136	6.54689	2.56228e-05	k9me2_wt_r1_peaks_unique	123.432	70.8261
1	11126526	11127703	589	0.79119	7.02237	1.51601e-06	k9me2_wt_r1_peaks_unique	171.013	98.823
1	11148017	11152955	2469	2.17458	7.81854	1.7235e-58	k9me2_wt_r1_peaks_unique	479.647	106.245
1	11321888	11323806	959	0.79591	7.2379	2.68327e-07	k9me2_wt_r1_peaks_unique	198.894	114.559
1	11365448	11367269	911	0.78276	7.00104	2.27e-06	k9me2_wt_r1_peaks_unique	168.012	97.6576
1	11502789	11512843	5027	2.10458	7.69398	3.04794e-50	k9me2_wt_r1_peaks_unique	429.427	99.85
1	11733670	11734178	254	1.16529	6.80919	3.2541e-10	k9me2_wt_r1_peaks_unique	167.944	74.8819
1	11752320	11754720	1200	2.32942	7.22288	1.18486e-44	k9me2_wt_r1_peaks_unique	334.901	66.6332
1	11788980	11794158	2589	1.94919	7.6903	1.69502e-43	k9me2_wt_r1_peaks_unique	405.876	105.106
1	11941898	11942957	530	0.70304	6.74818	4.50745e-05	k9me2_wt_r1_peaks_unique	137.158	84.2532
1	12222657	12223050	197	0.64528	6.90644	6.61646e-05	k9me2_wt_r1_peaks_unique	150.027	95.9227
1	12401555	12412670	5558	3.47568	7.13332	9.77265e-93	k9me2_wt_r1_peaks_unique	468.258	42.0922
1	12626451	12630567	2058	4.195	6.32553	1.1162e-78	k9me2_wt_r1_peaks_unique	343.23	18.7398
1	12698897	12701813	1458	1.16477	7.42176	1.88464e-14	k9me2_wt_r1_peaks_unique	256.737	114.514
1	12886065	12887513	724	0.80383	7.06231	6.69438e-07	k9me2_wt_r1_peaks_unique	176.586	101.153
1	12970708	12972008	650	0.43088	7.02628	0.00136418	k9me2_wt_r1_peaks_unique	151.347	112.271
1	12973857	12975394	769	0.5518	6.91996	0.000287209	k9me2_wt_r1_peaks_unique	146.612	100.014
1	13018361	13024813	3226	1.98858	7.37896	1.10486e-36	k9me2_wt_r1_peaks_unique	331.588	83.5559
1	13095287	13095570	142	0.42315	6.8474	0.0021702	k9me2_wt_r1_peaks_unique	133.341	99.4449
1	13199362	13199894	266	0.78471	6.51462	3.84912e-05	k9me2_wt_r1_peaks_unique	120.007	69.6603
1	13324813	13339621	7404	1.70915	7.45418	4.19898e-29	k9me2_wt_r1_peaks_unique	317.091	96.9793
1	13409316	13415415	3050	1.69888	7.51677	7.09393e-30	k9me2_wt_r1_peaks_unique	329.974	101.64
1	13418124	13421332	1604	1.90954	7.25676	2.30432e-31	k9me2_wt_r1_peaks_unique	296.426	78.902
1	13422616	13423366	375	0.84555	6.85862	1.29505e-06	k9me2_wt_r1_peaks_unique	155.567	86.573
1	13478467	13479185	359	0.98571	6.79626	7.2181e-08	k9me2_wt_r1_peaks_unique	156.402	78.9794
1	13499266	13501903	1319	1.53764	7.06069	8.19443e-19	k9me2_wt_r1_peaks_unique	227.466	78.3505
1	13544665	13545088	212	0.62947	6.27085	0.000812649	k9me2_wt_r1_peaks_unique	96.0414	62.0825
1	13559804	13565438	2817	2.134	7.63973	4.80268e-50	k9me2_wt_r1_peaks_unique	417.818	95.1895
1	13689410	13695154	2872	2.20293	7.41362	6.43087e-46	k9me2_wt_r1_peaks_unique	365.844	79.4599
1	13982055	13984953	1449	0.94465	6.79694	1.85674e-07	k9me2_wt_r1_peaks_unique	154.265	80.1491
1	13986312	13989702	1695	1.59455	6.83111	2.84377e-17	k9me2_wt_r1_peaks_unique	197.867	65.5187
1	14035680	14037006	663	2.22952	6.57085	6.00171e-27	k9me2_wt_r1_peaks_unique	205.873	43.8982
1	16538516	16544277	2881	1.82402	6.98351	2.31796e-24	k9me2_wt_r1_peaks_unique	238.116	67.2518
1	16551166	16558767	3801	1.54184	7.38801	3.12377e-23	k9me2_wt_r1_peaks_unique	285.813	98.1618
1	16565318	16565783	233	1.0774	6.56042	6.02461e-08	k9me2_wt_r1_peaks_unique	137.103	64.9708
1	16659829	16664197	2184	2.4767	7.32131	1.22928e-53	k9me2_wt_r1_peaks_unique	377.324	67.7881
1	16716445	16718327	941	1.22983	7.25794	2.33092e-14	k9me2_wt_r1_peaks_unique	234.404	99.9424
1	16853438	16857957	2260	2.64523	7.30254	1.66763e-60	k9me2_wt_r1_peaks_unique	394.848	63.1156
1	16880004	16881368	682	0.58986	6.91347	0.000155563	k9me2_wt_r1_peaks_unique	147.892	98.2605
1	17004283	17007263	1490	0.99434	6.91322	1.41544e-08	k9me2_wt_r1_peaks_unique	170.118	85.3932
1	17023210	17030838	3814	2.78597	7.57139	1.69178e-80	k9me2_wt_r1_peaks_unique	499.512	72.4244
1	17035015	17050007	7496	2.31632	7.26595	1.76417e-45	k9me2_wt_r1_peaks_unique	343.487	68.9649
1	17267424	17267733	155	0.30518	6.22641	0.0139095	k9me2_wt_r1_peaks_unique	83.2282	67.36
1	17361072	17365593	2261	1.78494	7.68619	1.31508e-36	k9me2_wt_r1_peaks_unique	382.326	110.946
1	17543909	17544830	461	0.27975	7.05218	0.00687718	k9me2_wt_r1_peaks_unique	146.226	120.451
1	17590121	17591164	522	0.51785	7.19166	0.000202477	k9me2_wt_r1_peaks_unique	174.924	122.169
1	17620938	17621896	479	1.37059	6.97742	8.23942e-15	k9me2_wt_r1_peaks_unique	202.632	78.3643
1	17624915	17627317	1201	1.93986	7.43297	2.39245e-36	k9me2_wt_r1_peaks_unique	338.474	88.2204
1	18002147	18007351	2602	2.58064	7.6019	1.49897e-70	k9me2_wt_r1_peaks_unique	475.144	79.4282
1	18094708	18095833	563	1.23663	6.73989	1.04273e-10	k9me2_wt_r1_peaks_unique	164.074	69.627
1	18228845	18229128	142	0.18823	6.92763	0.0151256	k9me2_wt_r1_peaks_unique	129.944	114.049
1	18271496	18271842	173	1.02259	6.48032	5.16385e-07	k9me2_wt_r1_peaks_unique	127.258	62.6405
1	18489910	18491526	808	0.43659	6.9522	0.00140427	k9me2_wt_r1_peaks_unique	144.057	106.441
1	18827727	18829116	695	0.47019	6.81916	0.00132555	k9me2_wt_r1_peaks_unique	132.905	95.9403
1	19595863	19599754	1946	1.84443	7.49539	1.52564e-34	k9me2_wt_r1_peaks_unique	341.941	95.2188
1	19706318	19706625	154	2.97375	5.24178	2.51805e-19	k9me2_wt_r1_peaks_unique	106.054	13.5002
1	19722787	19723154	184	0.48104	7.01334	0.000610019	k9me2_wt_r1_peaks_unique	152.626	109.351
1	20085015	20090745	2865	2.21082	7.60564	5.22004e-52	k9me2_wt_r1_peaks_unique	419.071	90.5241
1	20329784	20331506	861	1.28546	7.06816	5.90534e-14	k9me2_wt_r1_peaks_unique	209.512	85.9502
1	20375666	20377978	1156	0.33364	6.9244	0.00513313	k9me2_wt_r1_peaks_unique	136.355	108.202
1	20543844	20544499	328	0.34989	6.9784	0.00426471	k9me2_wt_r1_peaks_unique	142.355	111.698
1	20549092	20550250	579	0.47757	6.94872	0.000882428	k9me2_wt_r1_peaks_unique	145.765	104.687
1	20683442	20685901	1230	2.87527	6.96748	5.9787e-57	k9me2_wt_r1_peaks_unique	338.994	46.2008
1	20698080	20698363	142	0.48177	6.78041	0.00123897	k9me2_wt_r1_peaks_unique	129.903	93.0236
1	21307590	21308086	248	1.14846	6.48826	1.59612e-08	k9me2_wt_r1_peaks_unique	133.666	60.2977
1	21323307	21324296	495	0.44199	6.80511	0.00205772	k9me2_wt_r1_peaks_unique	130.337	95.9436
1	21345832	21352382	3275	2.36218	7.66241	9.61224e-62	k9me2_wt_r1_peaks_unique	459.366	89.3453
1	21390197	21392849	1326	1.57702	6.49176	7.29472e-14	k9me2_wt_r1_peaks_unique	155.446	52.1014
1	21410322	21410914	296	0.3917	6.88161	0.003013	k9me2_wt_r1_peaks_unique	135.06	102.947
1	21450211	21457566	3678	3.00956	7.07037	9.64695e-67	k9me2_wt_r1_peaks_unique	381.397	47.3598
1	21481143	21483384	1121	0.4359	6.94393	0.00161772	k9me2_wt_r1_peaks_unique	143.199	105.858
1	21797522	21800971	1725	2.51392	6.76903	2.55966e-38	k9me2_wt_r1_peaks_unique	260.654	45.635
1	21833939	21836945	1503	2.71126	6.67006	1.38613e-41	k9me2_wt_r1_peaks_unique	260.599	39.7927
1	22231231	22232691	730	1.20257	7.12149	9.31259e-13	k9me2_wt_r1_peaks_unique	211.245	91.7862
1	22849299	22850628	665	0.71973	6.72622	4.26752e-05	k9me2_wt_r1_peaks_unique	135.87	82.5019
1	23357985	23359093	554	0.50926	6.90714	0.000684809	k9me2_wt_r1_peaks_unique	143.188	100.602
1	23454245	23454773	264	0.36902	6.76873	0.00453737	k9me2_wt_r1_peaks_unique	123.918	95.9506
1	23708654	23710881	1114	0.37801	6.97728	0.00295746	k9me2_wt_r1_peaks_unique	143.637	110.529
1	24199355	24200124	385	0.57738	6.89867	0.000224617	k9me2_wt_r1_peaks_unique	145.751	97.6792
1	24272027	24277406	2690	2.0128	7.1626	7.69709e-33	k9me2_wt_r1_peaks_unique	287.815	71.3183
1	24350982	24353034	1026	2.96515	6.13744	5.35476e-35	k9me2_wt_r1_peaks_unique	196.722	25.1915
1	24428930	24429970	520	1.44706	6.29151	8.03019e-11	k9me2_wt_r1_peaks_unique	129.341	47.4383
1	24455826	24458321	1248	1.46572	7.47308	3.12806e-22	k9me2_wt_r1_peaks_unique	295.28	106.908
1	24463687	24464301	307	0.42087	6.96008	0.00192157	k9me2_wt_r1_peaks_unique	144.059	107.608
1	24590770	24592202	716	0.35105	6.98649	0.00380245	k9me2_wt_r1_peaks_unique	143.213	112.281
1	25072523	25073423	450	0.20386	6.95738	0.0141631	k9me2_wt_r1_peaks_unique	133.372	115.797
1	25449661	25450081	210	0.56879	6.90297	0.000224617	k9me2_wt_r1_peaks_unique	145.751	98.2629
1	25588461	25588807	173	0.40589	6.56978	0.0049637	k9me2_wt_r1_peaks_unique	109.344	82.5293
1	27204445	27205880	718	0.49961	6.98361	0.00056559	k9me2_wt_r1_peaks_unique	150.479	106.433
1	27903689	27904684	498	0.25098	6.9291	0.0103785	k9me2_wt_r1_peaks_unique	132.936	111.71
1	28718759	28719042	142	0.33989	6.82272	0.00601278	k9me2_wt_r1_peaks_unique	127.351	100.62
1	28805721	28806631	455	0.24698	6.84976	0.0110779	k9me2_wt_r1_peaks_unique	125.649	105.879
1	28807812	28808952	570	0.66356	6.889	4.92391e-05	k9me2_wt_r1_peaks_unique	149.167	94.1716
1	28816789	28817078	145	0.48471	6.74522	0.00138136	k9me2_wt_r1_peaks_unique	126.902	90.6896
Mt	82685	104783	11049	1.71326	6.52698	2.41241e-16	k9me2_wt_r1_peaks_unique	166.989	50.9267
Mt	107776	109927	1076	1.59597	6.77951	6.19164e-17	k9me2_wt_r1_peaks_unique	191.009	63.1857
Mt	111213	120243	4515	1.83483	7.81331	4.62902e-42	k9me2_wt_r1_peaks_unique	424.825	119.089
Mt	122190	136202	7006	2.74824	6.06238	1.64774e-28	k9me2_wt_r1_peaks_unique	173.225	25.7814
Mt	137919	141918	2000	1.8777	6.45189	2.94801e-18	k9me2_wt_r1_peaks_unique	167.816	45.6657
3	129233	130536	652	1.94524	7.16386	1.23406e-30	k9me2_wt_r1_peaks_unique	281.4	73.0717
3	340218	342006	894	0.56033	6.88153	0.000310487	k9me2_wt_r1_peaks_unique	143.181	97.0977
3	1699072	1700920	924	0.2737	7.02096	0.00747108	k9me2_wt_r1_peaks_unique	142.796	118.12
3	2544086	2544598	256	0.60713	6.77813	0.00023372	k9me2_wt_r1_peaks_unique	135.457	88.9279
3	4093072	4093470	199	0.28234	6.82709	0.00915824	k9me2_wt_r1_peaks_unique	125.215	102.959
3	4689993	4691063	535	0.39604	6.84232	0.00288637	k9me2_wt_r1_peaks_unique	131.63	100.031
3	5010608	5011436	414	0.48051	6.92587	0.000842322	k9me2_wt_r1_peaks_unique	143.621	102.937
3	5152358	5156483	2063	1.87614	7.3626	1.5768e-32	k9me2_wt_r1_peaks_unique	315.319	85.8966
3	5651196	5652429	617	1.78961	6.87603	6.45357e-22	k9me2_wt_r1_peaks_unique	218.401	63.1725
3	7029473	7029772	150	0.48231	6.69686	0.00150577	k9me2_wt_r1_peaks_unique	122.617	87.773
3	7499767	7500496	365	0.39271	6.77174	0.0034847	k9me2_wt_r1_peaks_unique	125.2	95.3648
3	7573928	7574974	523	0.47824	6.88329	0.00106899	k9me2_wt_r1_peaks_unique	139.335	100.022
3	7749952	7750320	184	0.54762	6.92626	0.000352613	k9me2_wt_r1_peaks_unique	147.041	100.597
3	7859920	7860421	251	0.74641	6.91232	8.27022e-06	k9me2_wt_r1_peaks_unique	156.013	92.9972
3	7896857	7897761	452	0.26272	7.04369	0.00754939	k9me2_wt_r1_peaks_unique	144.512	120.453
3	7970550	7971151	301	0.34754	6.96209	0.00422184	k9me2_wt_r1_peaks_unique	140.64	110.532
3	8272120	8272928	404	0.81054	7.02348	8.72586e-07	k9me2_wt_r1_peaks_unique	172.297	98.2381
3	8526064	8528096	1016	0.71569	7.26249	1.82346e-06	k9me2_wt_r1_peaks_unique	196.766	119.813
3	8627385	8627669	142	0.64649	6.81655	9.20812e-05	k9me2_wt_r1_peaks_unique	141.024	90.0906
3	8789775	8790311	268	0.72356	6.96289	1.04952e-05	k9me2_wt_r1_peaks_unique	160.304	97.0805
3	8824747	8825947	600	0.40002	6.91807	0.00239266	k9me2_wt_r1_peaks_unique	138.917	105.278
3	8842996	8858210	7607	2.2353	7.55138	1.16889e-51	k9me2_wt_r1_peaks_unique	407.041	86.4462
3	8937278	8938401	562	1.68586	6.72794	5.32395e-18	k9me2_wt_r1_peaks_unique	190.134	59.0969
3	8956308	8957182	437	1.19027	6.72882	3.981e-10	k9me2_wt_r1_peaks_unique	160.225	70.2139
3	9011533	9017209	2838	2.6142	7.50878	1.21304e-67	k9me2_wt_r1_peaks_unique	450.655	73.6024
3	9139847	9140686	420	0.58347	7.02541	0.000120327	k9me2_wt_r1_peaks_unique	159.47	106.424
3	9435344	9437662	1159	0.89634	7.30981	5.2164e-09	k9me2_wt_r1_peaks_unique	216.464	116.295
3	9444501	9446318	909	1.0531	7.25951	2.5067e-11	k9me2_wt_r1_peaks_unique	220.718	106.371
3	9688592	9689150	279	0.5268	6.70942	0.000765939	k9me2_wt_r1_peaks_unique	125.611	87.1857
3	10269806	10270307	251	0.51091	6.82182	0.000808957	k9me2_wt_r1_peaks_unique	135.043	94.7704
3	10274424	10274957	267	0.44017	6.83886	0.00185215	k9me2_wt_r1_peaks_unique	133.338	98.2765
3	10441007	10441682	338	1.86514	6.20536	1.69289e-15	k9me2_wt_r1_peaks_unique	140.842	38.6605
3	10461050	10464773	1862	2.78926	7.12799	8.6453e-60	k9me2_wt_r1_peaks_unique	367.76	53.2002
3	10530949	10532127	589	1.61227	7.08711	9.59027e-21	k9me2_wt_r1_peaks_unique	237.741	77.761
3	10559183	10562256	1537	1.56616	7.25619	7.31853e-22	k9me2_wt_r1_peaks_unique	263.064	88.8383
3	10630725	10631219	247	0.30719	6.96463	0.00590555	k9me2_wt_r1_peaks_unique	138.931	112.286
3	10641025	10641980	478	0.78402	6.99303	2.12077e-06	k9me2_wt_r1_peaks_unique	167.155	97.0745
3	10648201	10649238	519	0.37326	6.87242	0.00386521	k9me2_wt_r1_peaks_unique	133.348	102.949
3	10806568	10807681	557	0.84205	7.02196	3.84927e-07	k9me2_wt_r1_peaks_unique	174.005	97.0687
3	10816933	10818611	839	2.09257	6.81198	3.64799e-28	k9me2_wt_r1_peaks_unique	232.046	54.406
3	10828688	10828973	143	0.59517	6.70436	0.000352532	k9me2_wt_r1_peaks_unique	128.173	84.846
3	10917698	10922997	2650	2.57401	7.60913	3.03671e-70	k9me2_wt_r1_peaks_unique	476.435	80.0109
3	11045973	11046816	422	0.34238	6.98217	0.00426471	k9me2_wt_r1_peaks_unique	142.356	112.282
3	11112527	11112917	195	1.42269	6.16867	8.44584e-10	k9me2_wt_r1_peaks_unique	117.785	43.9358
3	11295559	11296628	535	1.85551	6.13365	7.55766e-15	k9me2_wt_r1_peaks_unique	133.566	36.9089
3	11363986	11364737	376	1.42687	6.76031	7.33041e-14	k9me2_wt_r1_peaks_unique	177.755	66.1136
3	11441350	11444744	1697	1.08098	6.74452	9.09747e-09	k9me2_wt_r1_peaks_unique	155.958	73.7223
3	11473921	11475573	826	1.57661	6.75648	3.14271e-16	k9me2_wt_r1_peaks_unique	186.727	62.6037
3	11657910	11661581	1836	1.98431	7.08821	1.49598e-30	k9me2_wt_r1_peaks_unique	270.665	68.4062
3	11890637	11891872	618	1.05504	7.00141	8.89118e-10	k9me2_wt_r1_peaks_unique	184.686	88.8863
3	11964068	11966301	1117	1.3555	7.52416	5.49627e-20	k9me2_wt_r1_peaks_unique	294.456	115.073
3	12267843	12268743	450	0.67739	6.87791	3.80945e-05	k9me2_wt_r1_peaks_unique	148.735	93.0036
3	12455293	12455785	246	0.37428	6.57428	0.00644099	k9me2_wt_r1_peaks_unique	108.49	83.6991
3	12560816	12572629	5907	2.1857	7.69173	4.38257e-54	k9me2_wt_r1_peaks_unique	440.983	96.9306
3	12631992	12632419	214	0.79963	6.84542	3.47075e-06	k9me2_wt_r1_peaks_unique	151.717	87.1607
3	12837745	12848402	5329	4.02322	6.48707	4.38228e-81	k9me2_wt_r1_peaks_unique	361.708	22.2458
3	12875484	12877629	1073	1.0116	6.95108	5.57091e-09	k9me2_wt_r1_peaks_unique	175.689	87.141
3	12901794	12904825	1516	1.7821	6.84541	2.62205e-21	k9me2_wt_r1_peaks_unique	213.259	62.007
3	13040238	13041310	536	0.54185	6.75503	0.000705361	k9me2_wt_r1_peaks_unique	130.324	89.5179
3	13053529	13058584	2528	1.69443	7.32012	3.62191e-26	k9me2_wt_r1_peaks_unique	287.483	88.8257
3	13266994	13268394	700	0.57983	7.00771	0.000139318	k9me2_wt_r1_peaks_unique	157.327	105.259
3	13293240	13293956	358	0.77503	6.86183	6.40796e-06	k9me2_wt_r1_peaks_unique	152.149	88.9125
3	13304387	13306816	1215	1.00594	7.30543	1.25569e-10	k9me2_wt_r1_peaks_unique	224.162	111.621
3	13311399	13313323	962	1.55667	6.67771	3.45699e-15	k9me2_wt_r1_peaks_unique	175.587	59.6882
3	13314653	13325754	5551	1.941	7.62082	2.14522e-41	k9me2_wt_r1_peaks_unique	385.696	100.449
3	14273684	14284796	5556	1.60304	7.74629	3.02873e-31	k9me2_wt_r1_peaks_unique	374.237	123.192
3	14471841	14472464	312	1.22937	6.52859	1.56143e-09	k9me2_wt_r1_peaks_unique	141.364	60.2924
3	14682977	14685421	1222	0.63733	6.97098	6.75899e-05	k9me2_wt_r1_peaks_unique	156.459	100.588
3	14729250	14735244	2997	1.18949	7.48456	1.87273e-15	k9me2_wt_r1_peaks_unique	270.466	118.588
3	14837483	14877469	19993	1.87128	7.88001	1.09457e-45	k9me2_wt_r1_peaks_unique	450.583	123.158
3	14953608	14954770	581	0.44088	6.84775	0.00188678	k9me2_wt_r1_peaks_unique	134.195	98.8597
3	15022228	15022744	258	0.73859	6.6516	4.0017e-05	k9me2_wt_r1_peaks_unique	129.867	77.8327
3	15173813	15178918	2553	1.54072	7.60917	1.00227e-26	k9me2_wt_r1_peaks_unique	333.035	114.469
3	15229595	15232244	1325	2.73811	7.07053	2.64366e-55	k9me2_wt_r1_peaks_unique	347.191	52.0373
3	15335614	15338768	1577	1.40447	7.12748	1.25944e-16	k9me2_wt_r1_peaks_unique	227.499	85.9392
3	15398376	15401337	1481	1.18803	7.53259	6.86781e-16	k9me2_wt_r1_peaks_unique	279.481	122.665
3	15557411	15557928	259	0.37314	7.06339	0.00285827	k9me2_wt_r1_peaks_unique	152.214	117.525
3	15561862	15562309	224	0.33614	6.99397	0.00430721	k9me2_wt_r1_peaks_unique	143.215	113.449
3	15760630	15761738	554	0.48909	6.93016	0.000842322	k9me2_wt_r1_peaks_unique	144.478	102.937
3	15847057	15854407	3675	2.29955	7.42971	4.32905e-50	k9me2_wt_r1_peaks_unique	382.545	77.705
3	15996476	16000074	1799	3.136	6.92348	1.8657e-65	k9me2_wt_r1_peaks_unique	359.907	40.9412
3	16201924	16202291	184	0.70852	6.38945	0.000230985	k9me2_wt_r1_peaks_unique	107.166	65.5803
3	16245122	16249885	2382	1.53776	7.403	2.74434e-23	k9me2_wt_r1_peaks_unique	288.391	99.3274
3	16371095	16372078	492	0.32367	6.88799	0.0062627	k9me2_wt_r1_peaks_unique	132.498	105.87
3	16441345	16441972	314	0.77772	6.81506	8.38618e-06	k9me2_wt_r1_peaks_unique	147.433	85.9961
3	16510869	16512917	1024	2.69455	6.66174	7.21853e-41	k9me2_wt_r1_peaks_unique	257.605	39.7936
3	16526889	16528750	931	0.85329	7.15199	1.06082e-07	k9me2_wt_r1_peaks_unique	191.16	105.811
3	16589146	16596111	3483	2.43889	7.4883	2.00041e-58	k9me2_wt_r1_peaks_unique	418.112	77.1105
3	16601043	16604135	1546	2.33978	7.28978	5.29051e-47	k9me2_wt_r1_peaks_unique	352.058	69.5457
3	16669876	16672616	1370	2.4242	7.27012	8.2026e-50	k9me2_wt_r1_peaks_unique	357.604	66.6263
3	16682413	16682868	228	0.54704	6.83092	0.000400452	k9me2_wt_r1_peaks_unique	137.61	94.1833
3	16709243	16711977	1367	1.14017	7.30291	4.38198e-13	k9me2_wt_r1_peaks_unique	234.427	106.361
3	16809241	16814133	2446	3.85507	7.01144	1.58198e-105	k9me2_wt_r1_peaks_unique	490.794	33.9163
3	16829323	16831888	1283	1.34883	7.40693	1.36087e-18	k9me2_wt_r1_peaks_unique	270.849	106.338
3	17076611	17077270	330	0.50856	6.7478	0.00098206	k9me2_wt_r1_peaks_unique	128.185	90.1041
3	17356769	17358079	655	1.27105	7.25303	2.94069e-15	k9me2_wt_r1_peaks_unique	236.969	98.19
3	17978526	17985487	3481	2.57023	7.7848	4.15831e-79	k9me2_wt_r1_peaks_unique	537.423	90.4899
3	18308656	18309235	290	1.28402	6.27957	8.42102e-09	k9me2_wt_r1_peaks_unique	121.228	49.7823
3	21585749	21586808	530	0.24289	6.87137	0.0120891	k9me2_wt_r1_peaks_unique	127.364	107.629
3	21846882	21847527	323	0.25618	6.8303	0.0110075	k9me2_wt_r1_peaks_unique	124.361	104.128
3	22113214	22115628	1207	2.48641	7.15519	1.4333e-48	k9me2_wt_r1_peaks_unique	337.418	60.2122
3	22232943	22242471	4764	2.40371	7.43771	4.09441e-55	k9me2_wt_r1_peaks_unique	398.812	75.3667
3	22509114	22510513	700	0.5057	6.80135	0.000926146	k9me2_wt_r1_peaks_unique	132.9	93.6041
3	22767102	22767642	270	1.43908	6.66079	2.23722e-13	k9me2_wt_r1_peaks_unique	166.61	61.4461
3	23067195	23068053	429	0.57054	6.72154	0.00045374	k9me2_wt_r1_peaks_unique	128.606	86.5985
3	23203710	23207219	1755	1.92048	7.88394	3.24455e-48	k9me2_wt_r1_peaks_unique	459.582	121.406
2	635481	636350	435	0.49288	6.82167	0.000949646	k9me2_wt_r1_peaks_unique	134.188	95.3546
2	1176575	1177470	448	0.47329	6.87239	0.0010449	k9me2_wt_r1_peaks_unique	138.049	99.4394
2	1215052	1215765	357	1.31454	6.63922	2.91421e-11	k9me2_wt_r1_peaks_unique	157.204	63.2043
2	1218345	1219736	696	2.10677	6.62036	3.26943e-25	k9me2_wt_r1_peaks_unique	204.187	47.4053
2	1221759	1222511	376	1.53238	6.45326	8.0274e-13	k9me2_wt_r1_peaks_unique	149.029	51.5203
2	1226151	1232287	3068	1.46457	7.39168	3.39432e-21	k9me2_wt_r1_peaks_unique	278.97	101.083
2	1251820	1252756	468	3.05021	6.07583	1.50221e-35	k9me2_wt_r1_peaks_unique	194.137	23.4371
2	1290305	1291067	381	0.41291	6.69075	0.00369757	k9me2_wt_r1_peaks_unique	119.197	89.5297
2	1342094	1345804	1855	0.89452	6.87328	3.28195e-07	k9me2_wt_r1_peaks_unique	159.846	85.9854
2	1402040	1402694	327	0.69235	6.94734	2.0116e-05	k9me2_wt_r1_peaks_unique	156.88	97.0842
2	1434544	1438814	2135	2.05531	7.21873	2.45853e-35	k9me2_wt_r1_peaks_unique	303.675	73.0633
2	1485612	1490607	2498	1.97367	7.515	1.20643e-39	k9me2_wt_r1_peaks_unique	362.499	92.294
2	1523624	1524008	192	0.4607	6.66679	0.00231708	k9me2_wt_r1_peaks_unique	119.192	86.6087
2	1727878	1728678	400	1.02104	6.77061	3.23535e-08	k9me2_wt_r1_peaks_unique	155.539	76.6434
2	1781513	1786866	2677	2.69269	7.31282	1.2149e-62	k9me2_wt_r1_peaks_unique	404.267	62.5299
2	1801967	1803347	690	0.76967	7.34445	1.94645e-07	k9me2_wt_r1_peaks_unique	212.201	124.467
2	1840393	1840804	206	0.77448	6.58027	2.9305e-05	k9me2_wt_r1_peaks_unique	125.15	73.1624
2	1905243	1913858	4308	2.42587	7.61692	8.1764e-63	k9me2_wt_r1_peaks_unique	455.042	84.6821
2	1943902	1946116	1107	0.82955	6.96278	1.05583e-06	k9me2_wt_r1_peaks_unique	166.29	93.572
2	1949529	1954753	2612	1.15606	7.29494	2.73229e-13	k9me2_wt_r1_peaks_unique	234.423	105.194
2	1956583	1959628	1523	1.07338	7.33905	4.82039e-12	k9me2_wt_r1_peaks_unique	234.873	111.613
2	1968479	1969119	320	0.83966	6.51764	9.77827e-06	k9me2_wt_r1_peaks_unique	122.571	68.4895
2	2021266	2021564	149	0.72972	6.80089	2.21972e-05	k9me2_wt_r1_peaks_unique	143.584	86.5841
2	2035981	2054271	9145	2.2957	7.7552	6.72319e-62	k9me2_wt_r1_peaks_unique	478.724	97.5013
2	2133509	2137191	1841	1.80266	7.48337	1.20888e-32	k9me2_wt_r1_peaks_unique	334.231	95.8057
2	2152761	2153325	282	0.73945	6.68412	3.59786e-05	k9me2_wt_r1_peaks_unique	132.868	79.5834
2	2158322	2158736	207	1.0697	6.49029	1.38946e-07	k9me2_wt_r1_peaks_unique	130.25	62.0535
2	2247810	2248115	153	0.36989	6.84601	0.00377228	k9me2_wt_r1_peaks_unique	130.776	101.2
2	2262610	2264439	915	2.96723	6.20387	1.3338e-36	k9me2_wt_r1_peaks_unique	206.141	26.3596
2	2273739	2282413	4337	2.7497	7.44494	7.6562e-72	k9me2_wt_r1_peaks_unique	451.878	67.1861
2	2514912	2518858	1973	1.37633	7.37242	1.03924e-18	k9me2_wt_r1_peaks_unique	266.979	102.84
2	2638814	2652389	6788	1.69237	7.48007	3.43674e-29	k9me2_wt_r1_peaks_unique	320.961	99.3112
2	2932515	2938743	3114	2.36594	7.16332	2.42446e-44	k9me2_wt_r1_peaks_unique	325.45	63.1342
2	2941308	2948358	3525	2.45443	6.91288	1.43244e-40	k9me2_wt_r1_peaks_unique	282.106	51.4702
2	2952424	2954739	1158	0.94037	7.28773	1.75001e-09	k9me2_wt_r1_peaks_unique	216.454	112.794
2	3175523	3179233	1855	1.47411	7.37127	3.05428e-21	k9me2_wt_r1_peaks_unique	275.962	99.334
2	3198936	3211486	6275	1.59158	7.37815	2.39296e-24	k9me2_wt_r1_peaks_unique	288.803	95.827
2	3512754	3513077	162	0.70018	6.77641	4.04612e-05	k9me2_wt_r1_peaks_unique	139.73	86.0033
2	3565307	3571953	3323	1.94891	7.59093	9.36183e-41	k9me2_wt_r1_peaks_unique	378.824	98.12
2	3799786	3800870	542	1.75227	6.31365	4.57355e-15	k9me2_wt_r1_peaks_unique	145.996	43.3366
2	3802237	3803328	546	2.52714	6.27312	2.7886e-28	k9me2_wt_r1_peaks_unique	185.682	32.2125
2	4061208	4067917	3355	1.884	7.35669	6.76333e-33	k9me2_wt_r1_peaks_unique	314.887	85.3128
2	4332967	4333602	318	1.1119	6.73692	4.28798e-09	k9me2_wt_r1_peaks_unique	156.81	72.5533
2	4451550	4456138	2294	1.68854	7.5443	3.78424e-30	k9me2_wt_r1_peaks_unique	335.128	103.97
2	4764308	4764915	304	0.89687	6.68659	1.01027e-06	k9me2_wt_r1_peaks_unique	140.558	75.4869
2	4873220	4889279	8030	1.99933	7.54588	1.07284e-41	k9me2_wt_r1_peaks_unique	373.65	93.456
2	4894652	4899054	2201	1.57053	7.57172	4.96974e-27	k9me2_wt_r1_peaks_unique	327.871	110.389
2	4946079	4946732	327	0.60969	6.94882	9.5445e-05	k9me2_wt_r1_peaks_unique	152.606	100.008
2	5411229	5415988	2380	0.91745	7.32754	1.9722e-09	k9me2_wt_r1_peaks_unique	220.749	116.874
2	5516786	5520515	1865	2.17669	7.18411	1.62506e-38	k9me2_wt_r1_peaks_unique	309.213	68.3924
2	5588701	5591226	1263	1.29751	6.60385	9.92967e-11	k9me2_wt_r1_peaks_unique	152.494	62.0386
2	5665227	5669331	2052	1.27812	7.1126	3.62438e-14	k9me2_wt_r1_peaks_unique	215.517	88.8648
2	5685358	5686094	368	0.49226	6.907	0.000802687	k9me2_wt_r1_peaks_unique	142.333	101.186
2	5687522	5687957	218	0.70601	6.71938	5.3003e-05	k9me2_wt_r1_peaks_unique	134.586	82.503
2	5844660	5858027	6684	2.34577	6.90693	4.33901e-37	k9me2_wt_r1_peaks_unique	270.562	53.2255
2	5947397	5948149	376	0.89988	6.90501	2.31707e-07	k9me2_wt_r1_peaks_unique	163.704	87.7344
2	6027106	6031269	2082	4.18059	6.60288	1.62771e-94	k9me2_wt_r1_peaks_unique	413.91	22.8257
2	6246844	6247688	422	0.49209	6.99558	0.000695793	k9me2_wt_r1_peaks_unique	151.337	107.6
2	6316804	6318116	656	1.00251	6.81525	4.54878e-08	k9me2_wt_r1_peaks_unique	159.4	79.5613
2	6371815	6373319	752	0.95577	7.06121	1.12464e-08	k9me2_wt_r1_peaks_unique	185.992	95.8911
2	6377325	6377765	220	1.09125	6.70324	8.31043e-09	k9me2_wt_r1_peaks_unique	152.099	71.3883
2	6420869	6427207	3169	1.88063	7.77125	1.05958e-42	k9me2_wt_r1_peaks_unique	419.22	113.846
2	6508307	6511580	1637	1.55912	7.51963	1.21235e-25	k9me2_wt_r1_peaks_unique	314.996	106.896
2	6559776	6560888	556	0.81506	7.08444	4.42754e-07	k9me2_wt_r1_peaks_unique	180.015	102.318
2	6766391	6772505	3057	1.79474	7.88218	6.15143e-42	k9me2_wt_r1_peaks_unique	439.448	126.659
2	6822869	6823360	246	0.44127	6.79595	0.00202008	k9me2_wt_r1_peaks_unique	129.48	95.3602
2	6827675	6828843	584	0.38941	7.00561	0.0023315	k9me2_wt_r1_peaks_unique	147.065	112.276
2	6859921	6860680	380	0.81653	6.77447	3.91503e-06	k9me2_wt_r1_peaks_unique	145.284	82.4933
2	6862997	6863992	498	0.98758	7.17864	1.07223e-09	k9me2_wt_r1_peaks_unique	204.001	102.882
2	6963847	6967255	1704	1.07175	6.87076	2.66506e-09	k9me2_wt_r1_peaks_unique	169.676	80.7217
2	7005034	7019644	7305	2.31773	7.40595	3.79412e-50	k9me2_wt_r1_peaks_unique	378.675	75.9556
2	7066908	7070866	1979	2.1677	7.11681	1.29382e-36	k9me2_wt_r1_peaks_unique	294.201	65.479
2	7073089	7073387	149	0.94528	6.38698	3.65907e-06	k9me2_wt_r1_peaks_unique	116.132	60.3106
2	7113066	7120028	3481	2.43451	7.31263	4.88644e-52	k9me2_wt_r1_peaks_unique	369.616	68.374
2	7224225	7229191	2483	3.17413	7.25519	8.82362e-84	k9me2_wt_r1_peaks_unique	458.97	50.8482
2	7264620	7265225	303	0.52338	6.77375	0.000725745	k9me2_wt_r1_peaks_unique	131.183	91.2694
2	7289329	7295492	3082	2.16567	7.36297	1.04856e-42	k9me2_wt_r1_peaks_unique	348.691	77.7157
2	7475577	7476275	349	0.53813	6.83538	0.000491081	k9me2_wt_r1_peaks_unique	137.61	94.7671
2	7581476	7584145	1335	2.54913	7.17243	2.41574e-51	k9me2_wt_r1_peaks_unique	348.979	59.6258
2	7999034	7999426	196	0.62575	6.87015	0.000109622	k9me2_wt_r1_peaks_unique	145.314	94.1752
2	8016517	8018778	1131	1.74561	7.21705	5.15961e-26	k9me2_wt_r1_peaks_unique	272.451	81.2471
2	8151810	8153273	732	0.48354	6.90266	0.000938119	k9me2_wt_r1_peaks_unique	141.478	101.188
2	8590008	8592455	1224	0.39268	6.89024	0.00305476	k9me2_wt_r1_peaks_unique	135.917	103.53
2	8596716	8597563	424	0.32397	7.01725	0.00493993	k9me2_wt_r1_peaks_unique	144.932	115.782
2	8602560	8602876	158	0.39722	6.89251	0.00305476	k9me2_wt_r1_peaks_unique	136.345	103.53
2	8626058	8626977	460	0.5639	7.02354	0.000178803	k9me2_wt_r1_peaks_unique	158.187	107.009
2	8827361	8828462	551	0.35832	6.92106	0.00404656	k9me2_wt_r1_peaks_unique	137.208	107.032
2	9161411	9161809	199	0.56641	6.62925	0.000635944	k9me2_wt_r1_peaks_unique	120.464	81.3486
2	9286603	9288006	702	0.40867	7.00015	0.00201643	k9me2_wt_r1_peaks_unique	147.491	111.108
2	9300511	9301681	585	0.46318	6.91724	0.00114184	k9me2_wt_r1_peaks_unique	141.91	102.939
2	9346963	9347420	229	0.53022	6.62151	0.00110196	k9me2_wt_r1_peaks_unique	118.326	81.9346
2	9603065	9603728	332	0.37572	6.8572	0.00381893	k9me2_wt_r1_peaks_unique	132.061	101.782
2	10085602	10093654	4026	3.44674	7.25234	7.42854e-99	k9me2_wt_r1_peaks_unique	503.452	46.1728
2	10533738	10534040	151	0.98291	6.31942	3.56477e-06	k9me2_wt_r1_peaks_unique	112.274	56.8058
2	10639429	10642444	1508	1.0373	7.1106	3.52939e-10	k9me2_wt_r1_peaks_unique	197.985	96.4661
2	10648892	10650268	688	0.94624	7.08253	1.37788e-08	k9me2_wt_r1_peaks_unique	188.138	97.6406
2	11788118	11790557	1220	0.31192	6.94434	0.00649605	k9me2_wt_r1_peaks_unique	137.216	110.537
2	12449459	12454436	2489	1.81539	7.52437	4.68799e-34	k9me2_wt_r1_peaks_unique	345.386	98.1336
2	12539084	12541637	1277	1.04519	7.30222	2.27881e-11	k9me2_wt_r1_peaks_unique	226.727	109.868
2	13407585	13408187	301	0.65596	6.67388	0.000136991	k9me2_wt_r1_peaks_unique	128.165	81.3404
2	13501748	13502993	623	0.75533	6.81365	1.41697e-05	k9me2_wt_r1_peaks_unique	146.151	86.5814
2	14089325	14092089	1382	0.68032	6.73685	6.90932e-05	k9me2_wt_r1_peaks_unique	135.018	84.255
2	14408029	14412415	2193	4.54585	6.82136	7.74723e-132	k9me2_wt_r1_peaks_unique	546.579	23.4
2	14554031	14555222	596	2.28765	6.04514	3.31472e-20	k9me2_wt_r1_peaks_unique	145.913	29.8843
2	14811716	14812392	338	0.15052	6.76953	0.0204509	k9me2_wt_r1_peaks_unique	114.944	103.556
2	15652057	15653668	806	0.46425	6.93403	0.00100431	k9me2_wt_r1_peaks_unique	143.624	104.106
2	15655471	15655855	192	0.46594	6.89389	0.00109318	k9me2_wt_r1_peaks_unique	139.765	101.19
2	16384430	16384799	185	0.38342	6.81057	0.00363012	k9me2_wt_r1_peaks_unique	128.202	98.2823
2	16626113	16626440	164	0.35322	6.37029	0.00826805	k9me2_wt_r1_peaks_unique	93.5004	73.1954
2	16720975	16722342	684	0.55602	6.95532	0.000257189	k9me2_wt_r1_peaks_unique	150.47	102.346
2	17092790	17095229	1220	2.30128	7.39775	4.84699e-49	k9me2_wt_r1_peaks_unique	374.388	75.957
5	47696	48086	195	0.3086	6.9728	0.00594998	k9me2_wt_r1_peaks_unique	139.788	112.869
5	250511	250962	226	0.91206	6.29885	1.08017e-05	k9me2_wt_r1_peaks_unique	107.999	57.3937
5	724947	726243	648	1.48966	7.13027	1.7534e-18	k9me2_wt_r1_peaks_unique	234.769	83.6005
5	1064537	1069567	2515	2.49694	6.91763	1.01955e-41	k9me2_wt_r1_peaks_unique	287.237	50.8847
5	1630727	1631292	283	0.29074	6.94137	0.00717709	k9me2_wt_r1_peaks_unique	135.932	111.122
5	2115159	2115654	248	0.42315	6.8474	0.0021702	k9me2_wt_r1_peaks_unique	133.341	99.4449
5	2230082	2231555	737	0.4738	6.95485	0.000882428	k9me2_wt_r1_peaks_unique	146.195	105.27
5	2418448	2419091	322	0.24193	7.05412	0.00908028	k9me2_wt_r1_peaks_unique	144.516	122.205
5	2425947	2426753	403	0.39939	6.98794	0.0022978	k9me2_wt_r1_peaks_unique	145.779	110.526
5	2470810	2471961	576	0.57887	6.80141	0.000302762	k9me2_wt_r1_peaks_unique	136.319	91.2641
5	3006034	3007338	652	2.2087	6.19077	8.50584e-21	k9me2_wt_r1_peaks_unique	157.054	33.9754
5	3638891	3639174	142	0.51392	6.76903	0.00085651	k9me2_wt_r1_peaks_unique	130.327	91.2701
5	4491621	4492797	588	0.42484	7.04557	0.00141408	k9me2_wt_r1_peaks_unique	153.064	114.021
5	4808647	4809218	286	0.27593	6.84015	0.00920262	k9me2_wt_r1_peaks_unique	126.073	104.126
5	4882432	4882985	277	0.3684	6.93393	0.00363476	k9me2_wt_r1_peaks_unique	138.922	107.615
5	4987933	4988797	432	0.75211	7.23791	7.30765e-07	k9me2_wt_r1_peaks_unique	195.899	116.312
5	5477683	5478765	541	0.43536	6.88693	0.0017308	k9me2_wt_r1_peaks_unique	137.626	101.776
5	5739342	5740489	574	0.68415	6.89926	3.24891e-05	k9me2_wt_r1_peaks_unique	151.307	94.1693
5	6403304	6407867	2282	3.01155	7.45825	1.73143e-86	k9me2_wt_r1_peaks_unique	499.391	61.9261
5	6433688	6439443	2878	2.47138	7.65931	4.2997e-67	k9me2_wt_r1_peaks_unique	476.06	85.8425
5	6501501	6501809	154	0.70802	6.87497	2.36186e-05	k9me2_wt_r1_peaks_unique	150.017	91.8342
5	6618902	6620508	803	0.29516	7.09435	0.00577431	k9me2_wt_r1_peaks_unique	151.369	123.363
5	7160811	7161376	283	0.20008	6.87328	0.0140855	k9me2_wt_r1_peaks_unique	125.655	109.383
5	7611303	7612082	390	0.65589	6.74452	8.94147e-05	k9me2_wt_r1_peaks_unique	134.594	85.4243
5	8246120	8247066	473	0.43439	6.97462	0.00145825	k9me2_wt_r1_peaks_unique	146.202	108.19
5	8253151	8253602	226	0.47332	6.9466	0.00102657	k9me2_wt_r1_peaks_unique	145.337	104.687
5	8259633	8259949	158	0.58732	6.83301	0.000225352	k9me2_wt_r1_peaks_unique	139.747	93.0123
5	8364417	8364831	207	0.99524	6.53237	5.4021e-07	k9me2_wt_r1_peaks_unique	130.689	65.5603
5	8400487	8401062	288	0.76461	6.90319	6.17776e-06	k9me2_wt_r1_peaks_unique	156.01	91.8294
5	8622784	8629409	3313	3.32259	7.24406	4.47026e-91	k9me2_wt_r1_peaks_unique	479.489	47.9269
5	8666661	8667175	257	0.92411	6.59615	1.41912e-06	k9me2_wt_r1_peaks_unique	133.27	70.2339
5	8852245	8852528	142	0.47525	6.90682	0.00111747	k9me2_wt_r1_peaks_unique	141.479	101.772
5	9013364	9013695	166	0.56942	6.83311	0.000335631	k9me2_wt_r1_peaks_unique	138.892	93.5976
5	9016324	9017040	358	0.48133	6.85937	0.00102091	k9me2_wt_r1_peaks_unique	137.19	98.2718
5	9020499	9022611	1056	2.52531	6.34859	1.49905e-29	k9me2_wt_r1_peaks_unique	195.53	33.964
5	9048866	9049410	272	1.36666	6.12144	4.39514e-09	k9me2_wt_r1_peaks_unique	111.8	43.3545
5	9061680	9063137	729	0.76877	6.93248	5.57764e-06	k9me2_wt_r1_peaks_unique	159.439	93.5778
5	9206575	9207325	375	2.66384	6.02032	4.01637e-26	k9me2_wt_r1_peaks_unique	163.397	25.7839
5	9249057	9253771	2357	2.64929	7.23639	3.76466e-58	k9me2_wt_r1_peaks_unique	377.684	60.2022
5	9346466	9346759	147	1.15591	6.63792	3.42473e-09	k9me2_wt_r1_peaks_unique	148.66	66.7162
5	9393195	9394233	519	0.88509	7.23004	1.46955e-08	k9me2_wt_r1_peaks_unique	204.023	110.469
5	9579935	9581790	928	0.28476	6.95345	0.00722106	k9me2_wt_r1_peaks_unique	136.791	112.289
5	9601763	9603212	725	0.56872	6.91147	0.000232558	k9me2_wt_r1_peaks_unique	146.609	98.846
5	9640849	9644506	1829	2.20976	7.69504	1.31418e-55	k9me2_wt_r1_peaks_unique	445.697	96.3465
5	9739138	9741757	1310	2.30067	6.62537	8.4208e-30	k9me2_wt_r1_peaks_unique	219.139	44.4785
5	9747815	9748566	376	1.21764	6.65602	4.0294e-10	k9me2_wt_r1_peaks_unique	153.792	66.1285
5	9760549	9762060	756	1.48703	7.12895	2.58339e-18	k9me2_wt_r1_peaks_unique	234.341	83.6002
5	9778451	9779186	368	0.4324	6.85201	0.00188678	k9me2_wt_r1_peaks_unique	134.197	99.4438
5	9904703	9909868	2583	1.75309	7.60844	9.05857e-34	k9me2_wt_r1_peaks_unique	358.29	106.292
5	10120486	10120773	144	1.11504	6.42909	9.35604e-08	k9me2_wt_r1_peaks_unique	126.817	58.5489
5	10179350	10183131	1891	1.6717	7.03897	1.90104e-21	k9me2_wt_r1_peaks_unique	234.724	73.6759
5	10189094	10189708	307	0.41206	6.99425	0.00201643	k9me2_wt_r1_peaks_unique	147.062	110.524
5	10266746	10268112	683	0.89786	6.91356	1.77642e-07	k9me2_wt_r1_peaks_unique	164.562	88.3177
5	10307534	10313989	3228	2.06207	7.23356	9.32153e-36	k9me2_wt_r1_peaks_unique	307.532	73.6455
5	10422969	10426848	1940	0.89358	7.13178	3.78782e-08	k9me2_wt_r1_peaks_unique	191.151	102.892
5	10491944	10493061	559	0.57763	6.88146	0.000259818	k9me2_wt_r1_peaks_unique	144.035	96.5126
5	10494221	10494636	208	0.77277	6.55622	3.46976e-05	k9me2_wt_r1_peaks_unique	123.008	71.9955
5	10534780	10535695	458	0.95279	6.91208	5.43512e-08	k9me2_wt_r1_peaks_unique	167.553	86.5634
5	10537789	10538200	206	0.62723	6.64917	0.000249451	k9me2_wt_r1_peaks_unique	124.74	80.7592
5	10644249	10646910	1331	1.80505	7.0111	3.09529e-24	k9me2_wt_r1_peaks_unique	241.123	69.0024
5	10654735	10655618	442	0.71734	6.70448	3.81282e-05	k9me2_wt_r1_peaks_unique	133.727	81.3353
5	10801746	10802938	596	2.23003	6.5124	4.13481e-26	k9me2_wt_r1_peaks_unique	197.734	42.1478
5	10830639	10835443	2402	0.84459	7.12361	1.49367e-07	k9me2_wt_r1_peaks_unique	186.872	104.063
5	10923194	10923668	237	0.36852	7.29805	0.00180862	k9me2_wt_r1_peaks_unique	178.813	138.505
5	10998006	10998462	228	0.57191	6.6006	0.000735602	k9me2_wt_r1_peaks_unique	118.32	79.5972
5	11278326	11281980	1827	1.27491	6.74683	2.21249e-11	k9me2_wt_r1_peaks_unique	167.067	69.0407
5	12662084	12662847	382	0.76816	7.01937	2.42712e-06	k9me2_wt_r1_peaks_unique	169.301	99.408
5	12961878	12963409	766	0.71403	6.85953	2.23543e-05	k9me2_wt_r1_peaks_unique	148.729	90.6676
5	13199709	13200001	146	0.69627	6.56412	0.000119616	k9me2_wt_r1_peaks_unique	120.447	74.3358
5	13344580	13353065	4243	1.88012	7.43149	3.3022e-34	k9me2_wt_r1_peaks_unique	331.198	89.9736
5	13489653	13492025	1186	1.24249	7.68432	7.27375e-19	k9me2_wt_r1_peaks_unique	316.391	133.72
5	13511350	13512858	754	1.27062	6.61733	1.69435e-10	k9me2_wt_r1_peaks_unique	152.497	63.2073
5	13515954	13516469	258	1.13448	6.46726	4.17854e-08	k9me2_wt_r1_peaks_unique	131.098	59.7149
5	13595028	13595753	363	0.28083	6.84259	0.00836931	k9me2_wt_r1_peaks_unique	126.501	104.125
5	13678069	13678746	339	0.59701	6.45687	0.000646454	k9me2_wt_r1_peaks_unique	108.037	71.4254
5	13755318	13759253	1968	1.51801	7.59049	1.60727e-25	k9me2_wt_r1_peaks_unique	326.173	113.889
5	13835255	13851985	8365	2.15806	7.58859	1.96493e-49	k9me2_wt_r1_peaks_unique	406.643	91.1114
5	13972188	13972634	223	0.32352	7.03866	0.00502308	k9me2_wt_r1_peaks_unique	147.076	117.531
5	14025837	14026834	499	0.96103	6.86676	6.96928e-08	k9me2_wt_r1_peaks_unique	162.836	83.6472
5	14098930	14100425	748	1.06822	7.12601	1.05496e-10	k9me2_wt_r1_peaks_unique	202.267	96.4627
5	14105487	14105995	254	0.56942	6.83311	0.000335631	k9me2_wt_r1_peaks_unique	138.892	93.5976
5	14289462	14290263	401	0.50733	7.08669	0.000367077	k9me2_wt_r1_peaks_unique	162.057	114.011
5	14315067	14317545	1239	0.73816	6.94394	7.45642e-06	k9me2_wt_r1_peaks_unique	159.015	95.3301
5	14436939	14437283	172	1.17166	6.27345	1.23348e-07	k9me2_wt_r1_peaks_unique	116.104	51.54
5	14443222	14449504	3141	2.20604	7.57515	5.86859e-51	k9me2_wt_r1_peaks_unique	409.628	88.778
5	14546782	14548592	905	2.37451	7.01309	2.64274e-40	k9me2_wt_r1_peaks_unique	294.137	56.7219
5	14635990	14636707	359	0.39505	6.83339	0.00284371	k9me2_wt_r1_peaks_unique	130.772	99.4476
5	14694642	14695926	642	0.58674	6.85961	0.000242285	k9me2_wt_r1_peaks_unique	142.319	94.7622
5	14825899	14834058	4080	3.31287	7.18561	2.35267e-87	k9me2_wt_r1_peaks_unique	458.903	46.1793
5	14952310	14953246	468	0.24102	7.06736	0.00911315	k9me2_wt_r1_peaks_unique	145.802	123.37
5	15076817	15085419	4301	2.47129	7.22909	3.46439e-50	k9me2_wt_r1_peaks_unique	353.296	63.7099
5	15291038	15291548	255	0.75568	6.74414	1.6383e-05	k9me2_wt_r1_peaks_unique	139.293	82.4987
5	15646135	15651199	2532	1.84421	7.67737	8.0853e-39	k9me2_wt_r1_peaks_unique	387.882	108.028
5	15653329	15653668	170	0.96823	6.56938	6.68617e-07	k9me2_wt_r1_peaks_unique	132.835	67.8965
5	15657829	15658406	289	0.93683	6.68403	5.33592e-07	k9me2_wt_r1_peaks_unique	142.266	74.3167
5	15662792	15663431	320	0.99029	7.03389	4.63501e-09	k9me2_wt_r1_peaks_unique	184.699	92.9733
5	15666057	15668354	1149	0.64602	7.81327	2.72434e-07	k9me2_wt_r1_peaks_unique	281.361	179.801
5	15678463	15681278	1408	0.67048	8.26124	1.00436e-09	k9me2_wt_r1_peaks_unique	387.078	243.2
5	15692926	15694879	977	0.50603	8.17927	2.29605e-06	k9me2_wt_r1_peaks_unique	345.438	243.243
5	15802167	15802788	311	0.26385	7.03022	0.00822447	k9me2_wt_r1_peaks_unique	143.226	119.287
5	15806233	15806902	335	0.21771	6.96428	0.0122822	k9me2_wt_r1_peaks_unique	134.656	115.795
5	16048578	16052870	2146	2.4609	6.84919	4.51047e-39	k9me2_wt_r1_peaks_unique	270.529	49.1371
5	16222980	16223728	374	0.39924	6.9493	0.00250231	k9me2_wt_r1_peaks_unique	141.919	107.611
5	16657097	16658291	597	1.32791	7.09907	8.57782e-15	k9me2_wt_r1_peaks_unique	217.222	86.5292
5	16681821	16682685	432	1.08625	6.78099	4.12454e-09	k9me2_wt_r1_peaks_unique	160.243	75.4718
5	16698538	16706249	3856	2.41283	7.67823	6.76278e-65	k9me2_wt_r1_peaks_unique	472.655	88.7586
5	16742938	16744110	586	0.48225	6.78966	0.00126774	k9me2_wt_r1_peaks_unique	130.761	93.6064
5	16899394	16899931	269	0.56799	7.0018	0.000166969	k9me2_wt_r1_peaks_unique	156.042	105.259
5	16908258	16910090	916	3.00857	6.22448	4.20504e-38	k9me2_wt_r1_peaks_unique	212.124	26.3585
5	17088593	17095884	3646	2.04743	7.80944	9.90202e-52	k9me2_wt_r1_peaks_unique	456.084	110.333
5	17126380	17127345	483	0.36503	6.97081	0.00376101	k9me2_wt_r1_peaks_unique	142.353	110.53
5	17304509	17309013	2252	1.77321	7.54553	5.16437e-33	k9me2_wt_r1_peaks_unique	345.403	101.05
5	17350972	17351303	166	0.28303	6.9223	0.00786024	k9me2_wt_r1_peaks_unique	133.789	109.956
5	17439724	17445848	3062	2.73711	7.75208	8.73413e-88	k9me2_wt_r1_peaks_unique	556.653	83.4896
5	17596589	17605881	4646	2.56709	7.6972	2.51623e-74	k9me2_wt_r1_peaks_unique	505.212	85.2516
5	17850289	17852685	1198	2.57145	6.85199	1.13828e-42	k9me2_wt_r1_peaks_unique	281.641	47.3819
5	17893652	17901591	3970	3.53929	7.18487	2.36305e-99	k9me2_wt_r1_peaks_unique	496.11	42.6722
5	18007250	18007890	320	0.15439	6.92544	0.0180796	k9me2_wt_r1_peaks_unique	128.234	115.22
5	18033608	18034039	216	0.3582	6.88922	0.00445122	k9me2_wt_r1_peaks_unique	134.207	104.7
5	18104280	18105039	380	1.00535	6.44459	7.37042e-07	k9me2_wt_r1_peaks_unique	123.406	61.4744
5	18142489	18146730	2121	1.89265	7.25896	3.63775e-31	k9me2_wt_r1_peaks_unique	295.146	79.4863
5	18152881	18153935	527	0.45754	6.69408	0.00203977	k9me2_wt_r1_peaks_unique	121.335	88.3593
5	18235772	18236754	491	0.23225	6.91976	0.0121917	k9me2_wt_r1_peaks_unique	131.224	111.712
5	18927644	18929422	889	1.26569	7.5713	3.13039e-18	k9me2_wt_r1_peaks_unique	294.913	122.654
5	18932291	18939127	3418	2.41872	7.69996	3.28907e-66	k9me2_wt_r1_peaks_unique	480.809	89.9219
5	19476497	19477308	406	0.64205	6.73761	0.000134289	k9me2_wt_r1_peaks_unique	133.309	85.4249
5	19516794	19518092	649	0.47525	6.90682	0.00111747	k9me2_wt_r1_peaks_unique	141.479	101.772
5	19575096	19575886	395	0.26269	6.90449	0.00941132	k9me2_wt_r1_peaks_unique	131.219	109.375
5	19704083	19704924	421	0.69034	6.73183	6.90932e-05	k9me2_wt_r1_peaks_unique	135.017	83.6713
5	19903139	19904317	589	0.43772	6.8631	0.00192137	k9me2_wt_r1_peaks_unique	135.482	100.027
5	19965133	19965850	359	0.98386	6.70747	1.31068e-07	k9me2_wt_r1_peaks_unique	146.972	74.3129
5	19988174	19989257	542	0.53444	6.88585	0.000453058	k9me2_wt_r1_peaks_unique	142.327	98.2666
5	20183305	20185873	1284	0.55603	6.73361	0.000559441	k9me2_wt_r1_peaks_unique	129.036	87.7663
5	20527005	20527297	146	0.84266	6.00788	0.000152137	k9me2_wt_r1_peaks_unique	86.1757	48.0528
5	20596387	20598144	879	1.30617	6.93453	4.36765e-13	k9me2_wt_r1_peaks_unique	192.353	77.7863
5	20836431	20837835	702	0.37249	6.99718	0.00299534	k9me2_wt_r1_peaks_unique	145.354	112.278
5	21251928	21252487	280	0.42556	6.87376	0.00195592	k9me2_wt_r1_peaks_unique	135.913	101.194
5	21373619	21374618	500	0.94526	7.02942	2.10422e-08	k9me2_wt_r1_peaks_unique	181.277	94.1435
5	21831535	21837192	2829	1.96908	7.34899	1.22637e-35	k9me2_wt_r1_peaks_unique	322.584	82.393
5	22001789	22007662	2937	2.4719	7.70767	3.20802e-69	k9me2_wt_r1_peaks_unique	492.377	88.7528
5	22223072	22223591	260	1.47744	6.42587	8.30113e-12	k9me2_wt_r1_peaks_unique	143.468	51.5232
5	22612993	22618210	2609	1.51343	7.5047	2.92367e-24	k9me2_wt_r1_peaks_unique	306.855	107.485
5	23738983	23739323	170	0.33293	6.71523	0.00705944	k9me2_wt_r1_peaks_unique	117.922	93.6213
5	23748993	23750910	959	0.365	7.03042	0.00310774	k9me2_wt_r1_peaks_unique	148.356	115.194
5	23777426	23778404	489	0.33248	7.02149	0.0044324	k9me2_wt_r1_peaks_unique	145.788	115.781
5	24017943	24022613	2335	1.44714	6.8081	1.748e-14	k9me2_wt_r1_peaks_unique	185.037	67.8619
5	24331790	24332373	292	0.56968	6.80602	0.000375161	k9me2_wt_r1_peaks_unique	136.321	91.8482
5	24997482	24999490	1004	0.43795	6.96859	0.00145825	k9me2_wt_r1_peaks_unique	145.772	107.606
5	25000757	25002184	714	0.54757	6.91785	0.000341861	k9me2_wt_r1_peaks_unique	146.183	100.014
5	25507603	25507893	145	0.51332	6.90078	0.000566932	k9me2_wt_r1_peaks_unique	142.759	100.018
5	26401820	26402574	377	0.58322	6.81277	0.000261289	k9me2_wt_r1_peaks_unique	137.604	91.847
4	501639	502444	403	0.33614	6.99397	0.00430721	k9me2_wt_r1_peaks_unique	143.215	113.449
4	1016842	1021563	2361	4.38822	6.74279	9.40592e-116	k9me2_wt_r1_peaks_unique	490.089	23.4039
4	1160722	1161409	344	0.19829	6.91782	0.0141338	k9me2_wt_r1_peaks_unique	129.514	112.882
4	1209560	1209921	181	0.5603	6.89015	0.000320795	k9me2_wt_r1_peaks_unique	144.037	97.6806
4	1312686	1314901	1108	2.3041	6.77103	9.1835e-33	k9me2_wt_r1_peaks_unique	242.708	49.1452
4	1438565	1439199	317	1.2891	6.17681	1.64222e-08	k9me2_wt_r1_peaks_unique	113.093	46.2782
4	1543684	1544196	256	0.30246	7.00653	0.00607992	k9me2_wt_r1_peaks_unique	142.791	115.785
4	1588656	1588980	162	0.40917	6.84043	0.00248825	k9me2_wt_r1_peaks_unique	132.057	99.4463
4	1865081	1866538	729	2.47874	6.67578	2.90116e-35	k9me2_wt_r1_peaks_unique	241.378	43.3034
4	2170119	2179225	4553	2.0615	7.55878	2.26569e-44	k9me2_wt_r1_peaks_unique	385.218	92.2854
4	2232040	2232841	401	0.3845	6.81964	0.00367787	k9me2_wt_r1_peaks_unique	129.059	98.8651
4	2235953	2237859	953	1.98284	6.97236	3.07568e-28	k9me2_wt_r1_peaks_unique	249.653	63.16
4	2263324	2265182	929	1.4419	6.90141	3.92486e-15	k9me2_wt_r1_peaks_unique	197.042	72.5277
4	2280023	2288518	4248	2.30825	7.81223	3.98447e-65	k9me2_wt_r1_peaks_unique	500.198	100.993
4	2380426	2380767	171	0.40267	6.90333	0.00235586	k9me2_wt_r1_peaks_unique	137.631	104.112
4	2560419	2560860	221	0.69116	6.61711	9.11287e-05	k9me2_wt_r1_peaks_unique	124.732	77.2536
4	2582667	2585057	1195	1.02421	6.89825	9.43626e-09	k9me2_wt_r1_peaks_unique	170.114	83.6414
4	2654376	2656005	815	1.01684	7.04712	1.94499e-09	k9me2_wt_r1_peaks_unique	188.124	92.9704
4	2735263	2735624	181	2.58446	5.69212	2.3273e-20	k9me2_wt_r1_peaks_unique	126.619	21.1105
4	2763102	2763652	275	0.96327	6.49052	1.0247e-06	k9me2_wt_r1_peaks_unique	125.553	64.3954
4	3360671	3361310	320	1.17109	6.51343	9.69268e-09	k9me2_wt_r1_peaks_unique	137.09	60.8795
4	4077949	4080393	1222	1.8175	6.67487	4.57454e-20	k9me2_wt_r1_peaks_unique	191.821	54.4221
4	4081756	4086616	2430	1.36098	6.66237	4.79002e-12	k9me2_wt_r1_peaks_unique	162.338	63.2012
4	4590611	4594682	2036	1.53533	7.50777	8.91753e-25	k9me2_wt_r1_peaks_unique	309.852	106.899
4	5311221	5312181	480	0.54386	6.9737	0.000274269	k9me2_wt_r1_peaks_unique	151.758	104.096
4	5342816	5344321	753	0.99853	6.88545	2.24999e-08	k9me2_wt_r1_peaks_unique	167.117	83.6437
4	5444976	5445985	505	0.556	6.86194	0.00035838	k9me2_wt_r1_peaks_unique	141.038	95.932
4	5555017	5557256	1120	1.76143	7.22493	1.40269e-26	k9me2_wt_r1_peaks_unique	275.45	81.2454
[truncated: 3,146 more rows]

## Sheet: WT vs ddm1 R2
chr	start	end	summit	M_value	A_value	P_value	Peak_Group	normalized_read_density_in_H3K9me2_WT_R2	normalized_read_density_in_H3K9me2_ddm1_R2
[truncated: 4,151 more rows]

[truncated: 2 more sheets: ddm1 vs ddm1rdr6 R1, ddm1 vs ddm1rdr6 R2]
