# Supplementary material for: Arabidopsis LTR retrotransposons and their regulation by epigenetically activated small RNA
Source: bioRxiv or medRxiv preprint supplement (doi:10.1101/2020.01.24.919167), 2020-02-27
Supplement: Supplementary file [file media-5.pdf]

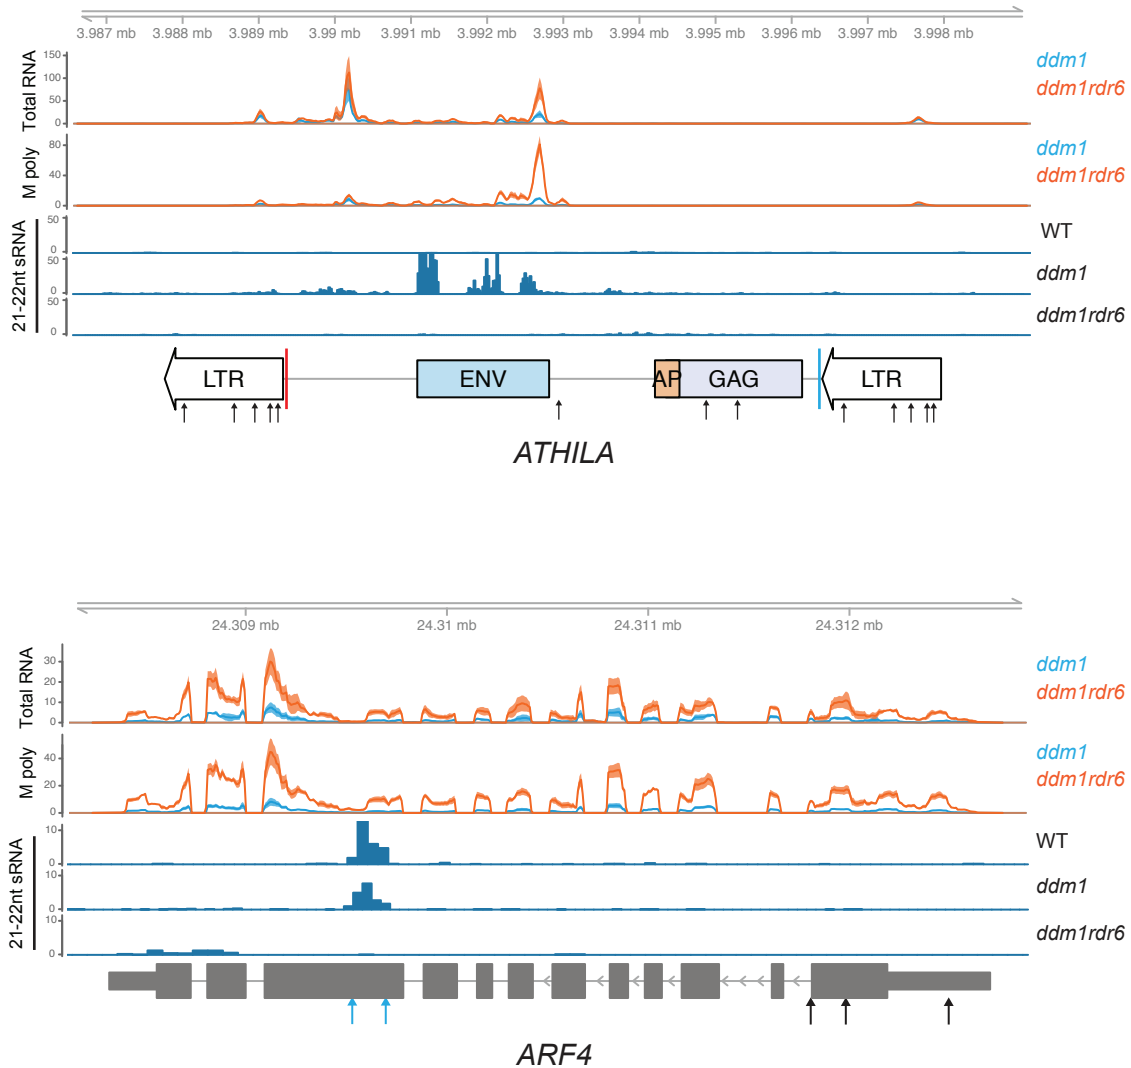

**Supplemental Figure S5. Polysomal occupancy of mRNA in *ddm1* and *ddm1rdr6*.** Total RNA and microsome-polysomal RNA (M poly) tracks are shown for *ATHILA* (AT4TE17360) and *ARF4* (AT5G60450), with annotation and 21-22nt easiRNA are as in Fig. 1. Black arrows indicate predicted miRNA target sites (Supplemental Table S4). Two target sites of the transacting small interfering RNA, tasiR-ARF4 are indicated as blue arrows (Williams et al., 2005).
