# Supplementary material for: Arabidopsis LTR retrotransposons and their regulation by epigenetically activated small RNA
Source: bioRxiv or medRxiv preprint supplement (doi:10.1101/2020.01.24.919167), 2020-02-27
Supplement: Supplementary file [file media-7.pdf]

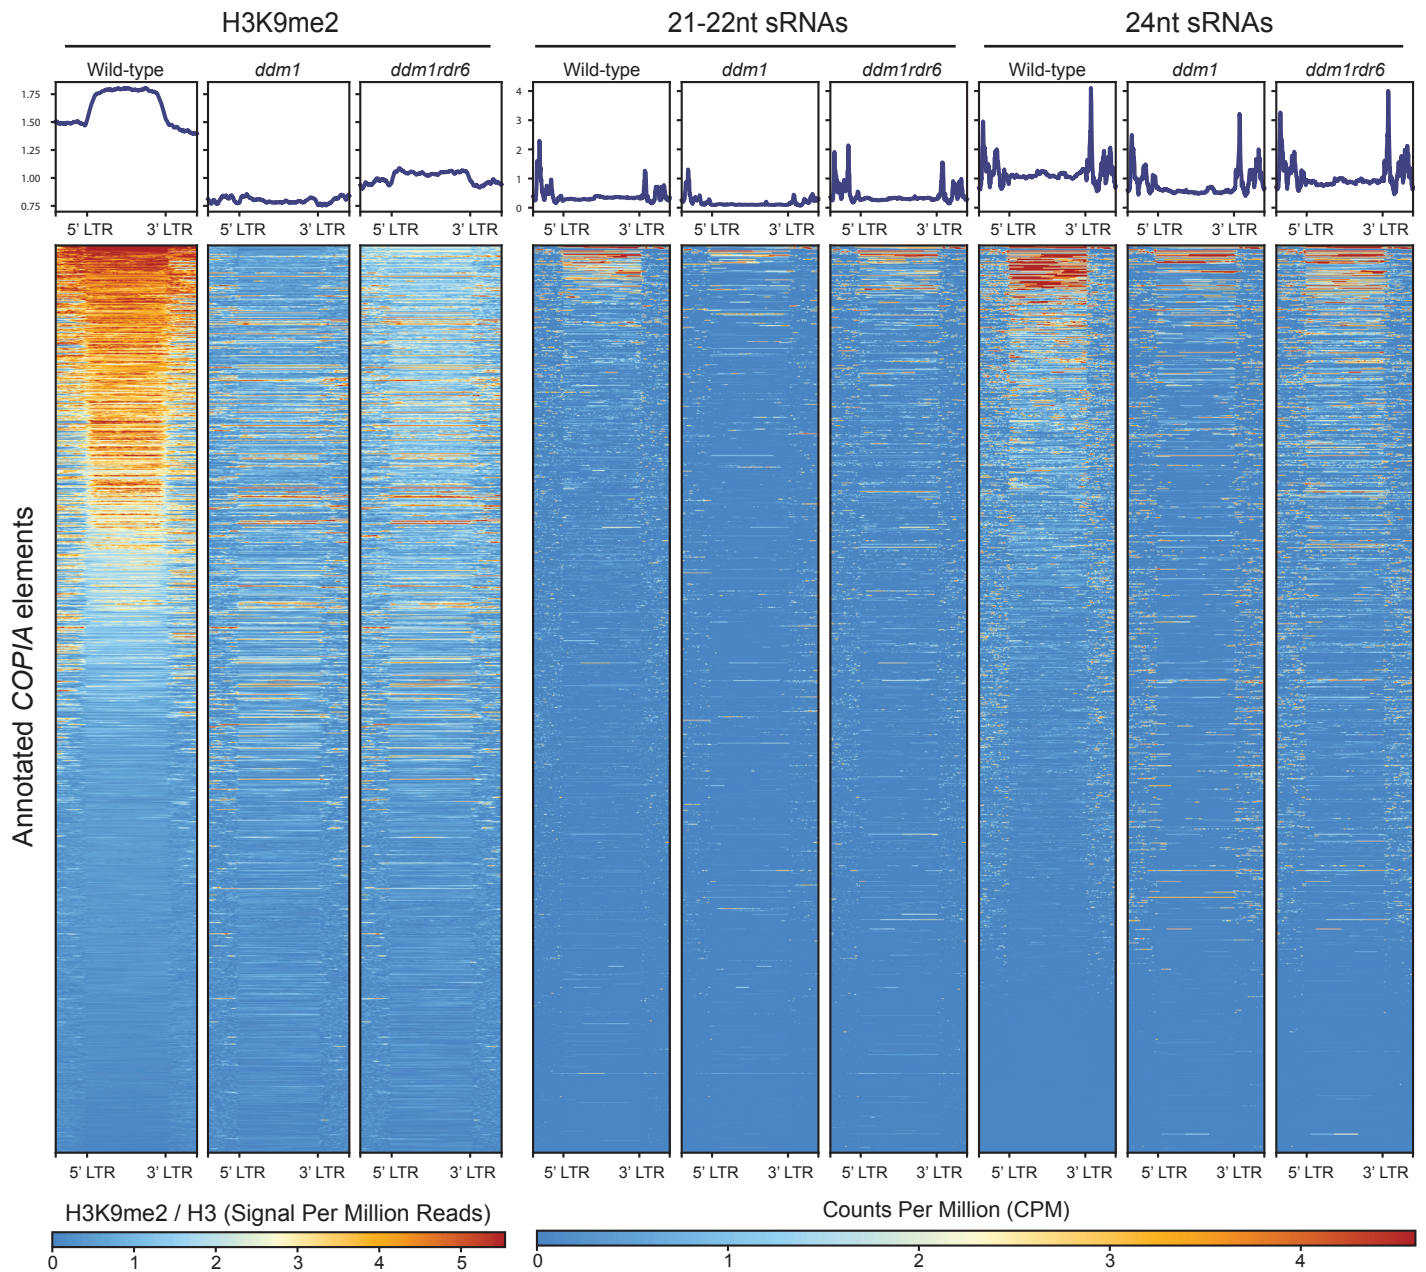

**Supplemental Figure S7. Up-regulation of H3K9me2 at *COPIA* family loci in *ddm1rdr6* as compared to *ddm1*.** H3K9me2 signal at transposable elements from multiple *COPIA* families was analyzed across wild-type (WT), *ddm1*, and *ddm1rdr6* genotypes and correlated with previously published small RNA data (Creasey et al., 2014).
